# Supplementary material for: Paired electrolysis enabled annulation for the quinolyl-modification of bioactive molecules
Source: Royal Society of Chemistry journal article supplement (doi:10.1039/d1sc06757e), 2022-01-01
Supplement: d1sc06757e2.pdf [file d1sc06757e2.pdf]

# Paired Electrolysis Enabled Annulation for the Quinolyl-modification of Bioactive Molecules

Shiqi You,<sup>[a]</sup> Mengyao Ruan,<sup>[a]</sup> Cuifen Lu,<sup>[a]</sup> Li Liu,<sup>[a]</sup> Guichun Yang,<sup>[a]</sup> Shengchun Wang,<sup>[b]</sup>  
Hesham Alhumade,<sup>[c]</sup> Aiwen Lei\*<sup>[b]</sup> and Meng Gao\*<sup>[a]</sup>

## Supporting Information

### TABLE OF CONTENTS

|                                                                                         |           |
|-----------------------------------------------------------------------------------------|-----------|
| <b>1. General Information</b>                                                           | <b>2</b>  |
| <b>2. Synthesis of Starting Materials</b>                                               | <b>3</b>  |
| 2.1 Synthesis of starting materials dipeptides                                          | 3         |
| 2.2 Synthesis of Methyl (2,3-dioxindoline-5-carbonyl)-L-valinate (6)                    | 7         |
| <b>3. General Procedure</b>                                                             | <b>8</b>  |
| 3.1 Reaction optimization                                                               | 8         |
| 3.2 General procedure for cyclic voltammetry (CV)                                       | 9         |
| 3.3 Bioactive molecules scope and characterization                                      | 10        |
| 3.4 Gram-Scale Experiments                                                              | 25        |
| 3.5 Polypeptide scope and characterization                                              | 25        |
| 3.6 Isatins, alkynes and selected small-molecule alcohols scope and<br>characterization | 27        |
| 3.7 PTL derivatives                                                                     | 40        |
| 3.8 Chemoselective transformations of quinoline-substituted bioactive<br>molecule       | 43        |
| <b>4. References</b>                                                                    | <b>45</b> |
| <b>5. Spectra</b>                                                                       | <b>46</b> |
| 5.1 NMR spectra of Products                                                             | 46        |
| 5.2 Fluorescence Measurement of selected Products                                       | 104       |

## **1. General Information**

Unless otherwise stated, analytical grade solvents and commercially available reagents were used without further purification. All solvents were analytical reagent or better and were degassed prior to use. The instrument for electrolysis was dual display potentiostat (DJS-292B) (made in China). The anode electrode is carbon rod electrodes ( $\Phi$  6mm) and the cathode electrode is platinum plate electrodes (15 mm $\times$ 15 mm $\times$ 0.3 mm). Thin layer chromatography (TLC) employed glass 0.25 mm silica gel plates. Flash chromatography columns were packed with 200-300 mesh silica gel in petroleum (boiling point is between 60-90°C). Gradient flash chromatography was conducted eluting with a continuous gradient from petroleum to the indicated solvent, and they are listed as volume/volume ratios. High resolution mass spectra (HRMS) for polypeptides were measured with an Agilent 6224 instrument and accurate masses were reported for the molecular ion + Hydrogen (M+H) or molecular ion + Sodium (M+Na). The  $^1\text{H}$ ,  $^{13}\text{C}$  and  $^{19}\text{F}$  NMR spectra were recorded on a Bruker Advance III (400 MHz) spectrometers with tetramethylsilane as an internal standard. All chemical shifts ( $\delta$ ) are reported in ppm and coupling constants (J) in Hz. For  $^1\text{H}$  NMR, chemical shifts ( $\delta$ ) were given in ppm relatives to internal standard (TMS at 0 ppm,  $\text{CDCl}_3$  at 7.26 ppm,  $\text{MeOH-}d_4$  at 3.31 ppm). For  $^{13}\text{C}$ -NMR, chemical shifts ( $\delta$ ) were reported in ppm using solvent as internal standard ( $\text{CDCl}_3$  at 77.00 ppm,  $\text{MeOH-}d_4$  at 49.00 ppm). GC-MS spectra were recorded on a Varian GC-MS 3900-2100T and Shimadzu GCMS-QP2010SE.

## 2. Synthesis of Starting Materials

### 2.1 Synthesis of starting materials dipeptides<sup>[1][2]</sup>

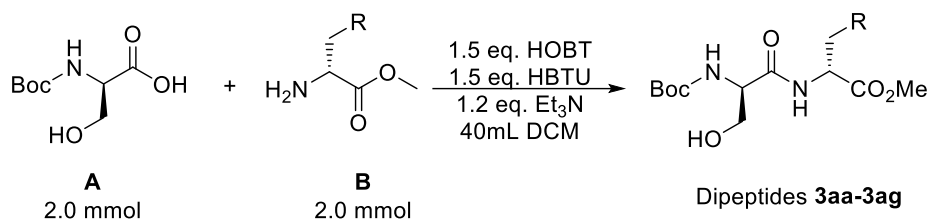

To a solution of Boc-L-serine **A** (410 mg, 2.0 mmol, 1.0 equiv.) in 40 mL CH<sub>2</sub>Cl<sub>2</sub> was added HOBT (1-hydroxybenzotriazole) (3.0 mmol), HBTU (O-benzotriazole-*N,N,N',N'*-tetramethyluronium-hexafluorophosphate) (3.0 mmol) and triethylamine (2.4 mmol). The mixture was stirred for 30 min at room temperature, and then, peptide **B** (2.0 mmol) was added to the solution. The reaction was stirred overnight. After regular workup, the reaction mixture washed by saturated NaHCO<sub>3</sub> solution (40 mL x 3), 2M hydrochloric acid solution (40 mL x 3) and H<sub>2</sub>O (40 mL x 3). The organic layers were combined, dried over Na<sub>2</sub>SO<sub>4</sub>, and concentrated. The resulting crude product was purified by flash chromatography (DCM/MeOH) to afford corresponding dipeptides **3aa-3ag**.

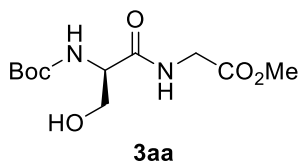

Dipeptide **3aa Boc-Ser-Gly-Ome**, white solid. <sup>1</sup>H NMR (400 MHz, Chloroform-d) δ 7.94 (s, 1H), 6.63 (s, 1H), 4.76 (s, 1H), 4.48 (dt, J = 11.0, 7.0 Hz, 1H), 3.99 – 3.87 (m, 2H), 3.68 (s, 3H), 3.72

- 3.56 (m, 2H), 1.41 (s, 9H).  $^{13}\text{C}$  NMR (101 MHz, Chloroform-d)  $\delta$  171.09, 170.46, 156.35, 79.55, 62.00, 55.00, 52.34, 41.60, 28.27.

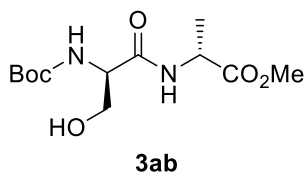

Dipeptide **3ab Boc-Ser-Ala-Ome**, colorless oil.  $^1\text{H}$  NMR (400 MHz, Chloroform-d)  $\delta$  7.75 (s, 1H), 6.66 (d,  $J = 11.0$  Hz, 1H), 4.71 (s, 1H), 4.52 (dt,  $J = 11.0, 7.0$  Hz, 1H), 4.32 (dq,  $J = 9.7, 6.8$  Hz, 1H), 3.70 (s, 3H), 3.71 – 3.63 (m, 1H), 3.61 (dt,  $J = 12.3, 6.7$  Hz, 2H), 1.40 (s, 9H), 1.33 (d,  $J = 6.9$  Hz, 3H).  $^{13}\text{C}$  NMR (101 MHz, Chloroform-d)  $\delta$  173.13, 171.17, 156.35, 79.55, 62.02, 54.55, 52.61, 48.27, 28.27, 17.76.

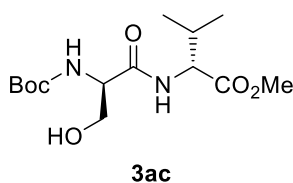

Dipeptide **3ac Boc-Ser-Val-Ome**, colorless oil.  $^1\text{H}$  NMR (400 MHz, Chloroform-d)  $\delta$  7.63 (d,  $J = 11.7$  Hz, 1H), 6.65 (d,  $J = 11.0$  Hz, 1H), 4.67 (s, 1H), 4.52 (dt,  $J = 11.0, 7.1$  Hz, 1H), 4.08 (dd,  $J = 11.8, 7.0$  Hz, 1H), 3.66 (s, 3H), 3.71 – 3.63 (m, 1H), 3.59 (dt,  $J = 12.5, 6.9$  Hz, 1H), 2.14 (h,  $J = 6.8$  Hz, 1H), 1.39 (s, 9H), 1.01 (d,  $J = 6.8$  Hz, 3H), 0.96 (d,  $J = 6.8$  Hz, 3H).  $^{13}\text{C}$  NMR (101 MHz, Chloroform-d)  $\delta$  173.42, 171.40, 156.33, 79.55, 62.06, 57.90, 54.59, 52.40, 30.38, 28.28, 19.05.

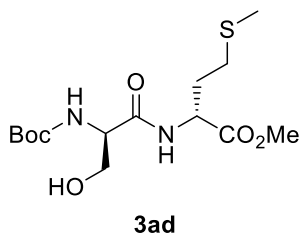

Dipeptide **3ad Boc-Ser-Met-Ome**, yellow oil.  $^1\text{H}$  NMR (400 MHz, Chloroform-d)  $\delta$  7.63 (d,  $J$  = 11.0 Hz, 1H), 6.67 (d,  $J$  = 11.0 Hz, 1H), 4.78 (s, 1H), 4.52 (dt,  $J$  = 11.0, 7.0 Hz, 1H), 4.26 (dt,  $J$  = 11.0, 7.0 Hz, 1H), 3.71(s, 3H) , 3.68 – 3.58 (m, 2H), 2.61 (td,  $J$  = 7.1, 1.4 Hz, 2H), 2.07 (s, 3H), 2.12 – 1.93 (m, 2H), 1.40 (s, 9H).  $^{13}\text{C}$  NMR (101 MHz, Chloroform-d)  $\delta$  173.06, 171.23, 156.30, 79.55, 62.05, 54.47, 52.47, 51.60, 31.22, 30.82, 28.29, 14.82.

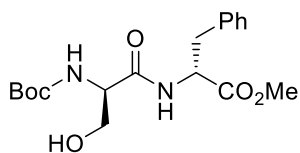

**3ae**

Dipeptide **3ae Boc-Ser-Phe-Ome**, white solid,  $^1\text{H}$  NMR (400 MHz, Chloroform-d)  $\delta$  7.65 (d,  $J$  = 11.4 Hz, 1H),  $\delta$  7.23(d,  $J$  = 7.4 Hz, 2H), 7.04 (d,  $J$ =6.3 Hz, 3H), 6.65 (d,  $J$  = 11.0 Hz, 1H), 4.77 (s, 1H), 4.58 – 4.48 (m, 2H), 3.68 (s, 3H), 3.67 – 3.56 (m, 2H), 3.03 – 2.92 (m, 2H), 1.40 (s, 9H).  $^{13}\text{C}$  NMR (101 MHz, Chloroform-d)  $\delta$  171.56, 156.33, 136.71, 129.17, 128.60, 127.16, 79.34, 62.09, 54.49, 53.66, 52.35, 37.79, 28.30.

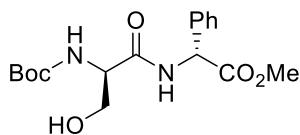

**3af**

Dipeptide **3af Methyl(R)-2-((R)-2-((tert-butoxycarbonyl)amino)-3-hydroxypropanamido)-2-phenylacetate**, colorless oil,  $^1\text{H}$  NMR (400 MHz, Chloroform-d)  $\delta$  7.64 (d,  $J$  = 10.8 Hz, 1H), 7.43 – 7.40 (m, 2H), 7.39 – 7.28 (m, 3H), 6.67 (d,  $J$  = 11.0 Hz, 1H), 5.51 (d,  $J$  = 8.9 Hz, 0H), 4.72 (s, 1H), 4.57 (dt,  $J$  = 11.0, 7.1 Hz, 1H), 3.74 (s, 3H), 3.72 – 3.63 (m, 1H), 3.65 – 3.56 (m, 1H), 1.40 (s, 9H).  $^{13}\text{C}$  NMR (101 MHz, Chloroform-d)  $\delta$  171.45, 170.84, 156.32, 136.83, 128.91, 128.49, 128.02, 79.44, 62.11, 55.43, 54.80, 52.92, 28.30.

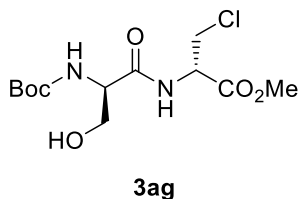

Dipeptide **3ag** Methyl(*S*)-2-((*R*)-2-((*tert*-butoxycarbonyl)amino)-3-hydroxypropanamido)-3-chloropropanoate, colorless oil,  $^1\text{H}$  NMR (400 MHz, Chloroform-*d*)  $\delta$  7.68 (d,  $J$  = 10.6 Hz, 1H), 6.65 (d,  $J$  = 11.0 Hz, 1H), 4.74 (s, 1H), 4.55 – 4.92 (m, 2H), 3.86 (dd,  $J$  = 12.5, 7.0 Hz, 1H), 3.76 (dd,  $J$  = 12.4, 7.1 Hz, 1H), 3.70 (s, 2H), 3.69 – 3.56 (m, 2H), 1.40 (s, 9H).  $^{13}\text{C}$  NMR (101 MHz, Chloroform-*d*)  $\delta$  171.78, 171.07, 156.31, 79.55, 62.08, 54.71, 54.08, 52.43, 45.98, 28.27.

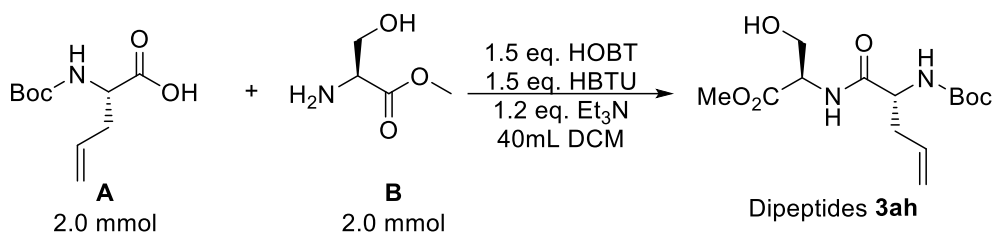

In a round bottomed flask, equipped with a stir bar, peptide **A** (2.0 mmol), HOBT (1-hydroxybenzotriazole) (3.0 mmol), HBTU (O-benzotriazole-*N, N, N', N'*-tetramethyluronium-hexafluorophosphate) (3.0 mmol), dichloromethane (40 mL) and triethylamine (2.4 mmol) were combined and added. The mixture was stirred for 30 min at room temperature, and then, peptide **B** (2.0 mmol) was added to the solution. The reaction was stirred overnight. After regular workup, the reaction mixture washed by saturated  $\text{NaHCO}_3$  solution (40 mL x 3), 2M hydrochloric acid solution (40 mL x 3) and  $\text{H}_2\text{O}$  (40 mL x 3). The organic layers were combined, dried over  $\text{Na}_2\text{SO}_4$ , and concentrated. The resulting crude product was purified by flash chromatography (DCM/MeOH) to afford corresponding dipeptides **3ah**.

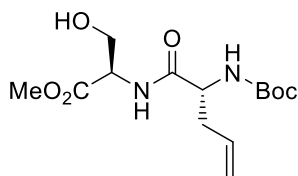

**3ah**

Dipeptide **3ah** Methyl ((*R*)-2-((*tert*-butoxycarbonyl)amino)pent-4-enoyl)-*D*-serinate, colorless oil,  $^1\text{H}$  NMR (500 MHz, Chloroform-*d*)  $\delta$  7.36 (d,  $J$  = 12.1 Hz, 1H), 6.35 (d,  $J$  = 10.4 Hz, 1H), 5.80 – 5.71 (m, 1H),  $\delta$  5.10 (dd,  $J$  = 13.3, 4.7 Hz, 1H), 4.33 – 4.21 (m, 3H), 4.19 (t,  $J$  = 6.7 Hz, 1H), 3.84 – 3.74 (m, 3H), 3.69 (s, 3H), 2.52 – 2.39 (m, 3H), 1.41 (s, 9H).  $^{13}\text{C}$  NMR (101 MHz, Chloroform-*d*)  $\delta$  172.15, 155.42, 133.00, 118.57, 79.55, 64.87, 54.59, 53.61, 52.64, 35.89, 28.32.

## 2.2 Synthesis of Methyl (2,3-dioxindoline-5-carbonyl)-*L*-valinate (**6**)<sup>[3]</sup>

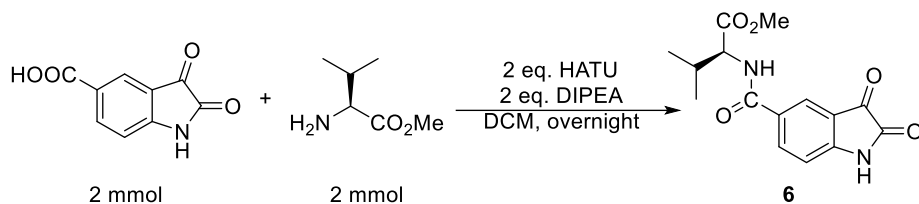

*L*-Valine Methyl Ester Hydrochloride (2.0 mmol), HATU (3.0 mmol) and DIPEA (3.0 mmol) were dissolved in DCM (20 mL) and the solution was stirred at 0 °C under an argon atmosphere for 10min. Then, 2,3-Dioxindoline-5-carboxylic Acid (2.0 mmol) in DCM (10 mL) was added dropwise, and the reaction mixture was stirred overnight at 0 °C to room temperature. The solvent was removed by reduced pressure, and the crude product was purified by silica gel chromatography with  $\text{CH}_2\text{Cl}_2/\text{MeOH}$  to get the product **5**, a yellow solid. Yield was 95%.  $^1\text{H}$  NMR (400 MHz, Methanol-*d*<sub>4</sub>)  $\delta$  8.09 – 8.02 (m, 1H), 7.92 – 7.79 (m, 1H), 6.97 (dd,  $J$  = 21.8, 8.2 Hz, 1H), 4.49 – 4.45 (m, 1H), 3.75 (s, 3H), 2.28 – 2.21 (m, 1H), 1.02 (dd,  $J$  = 11.5, 6.8 Hz, 6H).  $^{13}\text{C}$  NMR (101 MHz, Methanol-*d*<sub>4</sub>)  $\delta$  183.37, 172.46, 167.37, 160.07, 153.03, 128.82, 123.90, 123.40, 117.69, 111.91, 58.88, 51.27, 30.34, 18.30, 17.88.

### 3. General Procedure

#### 3.1. Reaction optimization

In an oven-dried undivided three-necked bottle (25 mL) equipped with a stir bar, isatin (0.3 mmol), dimethyl but-2-ynedioate (0.45 mmol), serine residue (0.45 mmol),  $n\text{Bu}_4\text{NBF}_4$  (0.15 mmol) and KI (0.06 mmol) were combined and added. Then, solvent (6 mL) were injected into the tubes via syringes. The bottle was equipped with carbon rod ( $\phi$  6 mm, about 10 mm immersion depth in solution) as the anode and platinum plate (15 mm $\times$ 15 mm $\times$ 0.3 mm) as the cathode. The reaction mixture was stirred and electrolysis at constant current under room temperature. When the reaction was finished, the solvent was removed by reduced pressure and the crude product was purified by flash column chromatography on silica gel (eluent: petroleum ether/ethyl acetate= 5:1). A summary of optimization results is presented in **Table S1** below.

**Table S1. Investigation of the reaction conditions**

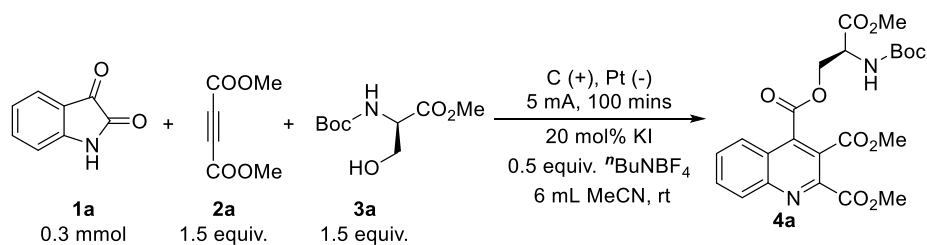



| Entry | Variation from Standard Conditions <sup>[a]</sup>                                                      | Yield (%) |
|-------|--------------------------------------------------------------------------------------------------------|-----------|
| 1     | none                                                                                                   | 85        |
| 2     | Without KI                                                                                             | N.D.      |
| 3     | CH <sub>2</sub> Cl <sub>2</sub> as the solvent                                                         | Trace     |
| 4     | 5mL CH <sub>3</sub> CN, 1 mL H <sub>2</sub> O was used                                                 | 35        |
| 5     | Carbon as cathode                                                                                      | 70        |
| 6     | <sup>n</sup> Bu <sub>4</sub> NPF <sub>6</sub> instead of <sup>n</sup> Bu <sub>4</sub> NBF <sub>4</sub> | 74        |
| 7     | <sup>n</sup> Bu <sub>4</sub> ClO <sub>4</sub> instead of <sup>n</sup> Bu <sub>4</sub> NBF <sub>4</sub> | 63        |
| 8     | KI as electrolyte                                                                                      | 89        |
| 9     | I <sub>2</sub> instead of KI                                                                           | N.D.      |
| 10    | 0.1 equiv. KI was added                                                                                | 67        |
| 11    | 10 mA, 90 mins                                                                                         | 76        |
| 12    | without electric current                                                                               | N.R.      |

<sup>a</sup>Reaction conditions: Undivided cell, carbon rod anode, Pt cathode, **1a** (0.3 mmol), **2a** (1.5 equiv.), **3a** (1.5 equiv.), <sup>n</sup>Bu<sub>4</sub>NBF<sub>4</sub> (0.5 equiv.), KI (0.2 equiv.), 6 mL MeCN, air, rt, 5 mA, 100 mins. Yields of isolated products are shown. N.D. = Not Detected. N.R. = No Reaction.

### 3.2 General procedure for cyclic voltammetry (CV)

Cyclic voltammetry was performed in a three-electrode cell connected to a schlenk line at room temperature. The working electrode was a steady glassy carbon disk electrode, the counter electrode was a platinum wire. The reference was an Ag/AgCl electrode submerged in saturated aqueous KCl solution and separated from a reaction by a salt bridge. The cyclic voltammetry (CV) experiments on 0.015 M <sup>n</sup>Bu<sub>4</sub>NBF<sub>4</sub> with 0.003 M substrate and 20 mol% KI with 0.003 M substrate were performed, respectively. The scan rate is 0.1 V/s. The positive scan range was from 0 V to 2.0 V and 0 V to -2.0 V.

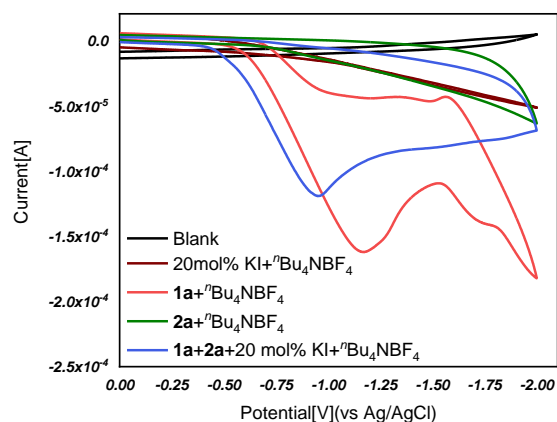

**Figure S1.** As shown in this graphic, the cyclic voltammograms showed irreversible reduction waves for isatin (**1a**).

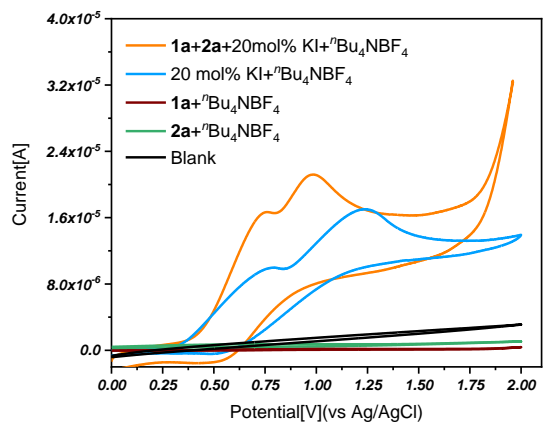

**Figure S2.** These results illustrated that two oxidation peak of **KI** was observed at 0.82 V and 1.22 V while the oxidation peaks of  $n\text{Bu}_4\text{BF}_4$  and substrate were not observed.

### 3.3 Bioactive molecules scope and characterization

**General procedure for bioconjugated product (4a):** In an oven-dried undivided three-necked bottle (25 mL) equipped with a stir bar, isatin (0.3 mmol), dimethyl but-2-ynedioate (0.45 mmol), serine residue (0.45 mmol),  $n\text{Bu}_4\text{NBF}_4$  (0.15 mmol) and KI (0.06 mmol) were combined and added. Then,  $\text{CH}_3\text{CN}$  (6 mL) were injected into the tubes via syringes. The bottle was equipped with carbon rod ( $\phi$  6 mm, about 10 mm immersion depth in solution) as the anode and platinum plate

(15 mm×15 mm×0.3 mm) as the cathode. The reaction mixture was stirred and electrolysis at a constant current of 5 mA under room temperature for 100 mins. After completion of the reaction, as indicated by TLC and LC-MS, the pure product (yield: 85%, 124.95 mg) was obtained by flash column chromatography on silica gel (eluent: petroleum ether/ethyl acetate= 5:1).

**Detailed descriptions for products:**

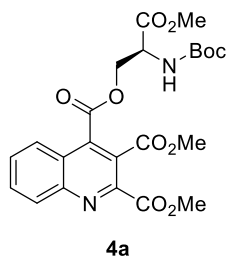

**(S)-4-(2-((tert-butoxycarbonyl)amino)-3-methoxy-3-oxopropyl)-2,3-dimethyl quinoline-2,3,4-tricarboxylate (4a):** light yellow solid (Yield: 85 %, 124.95 mg), <sup>1</sup>H NMR (400 MHz, Chloroform-d) δ 8.24 (d, J = 8.4 Hz, 1H), 7.95 (d, J = 8.3 Hz, 1H), 7.87 (t, J = 7.7 Hz, 1H), 7.71 (t, J = 7.6 Hz, 1H), 5.56 (d, J = 8.4 Hz, 1H), 4.80 (d, J = 3.3 Hz, 2H), 4.68 (s, 1H), 4.02 (s, 3H), 3.95 (s, 3H), 3.74 (s, 3H), 1.41 (s, 9H). <sup>13</sup>C NMR (101 MHz, Chloroform-d) δ 171.39, 169.83, 165.85, 165.75, 164.98, 155.30, 147.97, 147.60, 139.85, 132.41, 130.50, 130.23, 125.51, 123.62, 80.46, 66.25, 53.50, 52.91, 52.84, 52.54, 28.25. HRMS (ESI) cald. for (M+H)<sup>+</sup> C<sub>23</sub>H<sub>27</sub>N<sub>2</sub>O<sub>10</sub>: 491.1587 found, 491.1589.

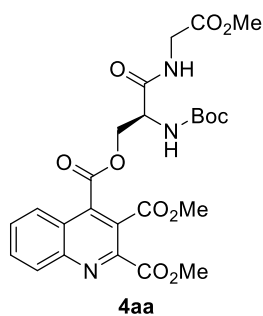

**(S)-4-(2-((tert-butoxycarbonyl)amino)-3-((2-methoxy-2-oxoethyl)amino)-3-oxopropyl)-2,3-dimethyl quinoline-2,3,4-tricarboxylate (4aa):** light yellow oil (Yield: 53 %, 86.97 mg), <sup>1</sup>H NMR (400 MHz, Chloroform-d) δ 8.25 (d, J = 8.3 Hz, 1H), 8.00 (d, J = 8.4 Hz, 1H), 7.89 (t, J =

7.1 Hz, 1H), 7.74 (t,  $J = 7.7$  Hz, 1H), 7.11 (s, 1H), 5.67 (dd,  $J = 47.0, 7.7$  Hz, 2H), 4.96 – 4.74 (m, 2H), 4.03 (s, 3H), 3.97 (s, 3H), 3.62 (s, 2H), 2.77 (s, 3H), 1.42 (s, 9H).  $^{13}\text{C}$  NMR (101 MHz, Chloroform- $d$ )  $\delta$  169.94, 169.38, 168.99, 165.73, 165.09, 155.70, 147.90, 147.65, 139.86, 132.49, 130.54, 130.38, 125.62, 123.64, 122.35, 80.63, 65.79, 53.71, 53.54, 52.97, 52.30, 38.61, 28.28.

HRMS (ESI) cald. for  $(\text{M}+\text{H})^+$   $\text{C}_{25}\text{H}_{30}\text{N}_3\text{O}_{11}$ :548.1836 found,548.1839.

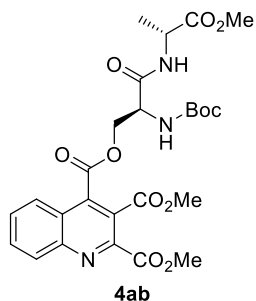

**4-((S)-2-((tert-butoxycarbonyl)amino)-3-(((R)-1-methoxy-1-oxopropan-2-yl)amino)-3-**

**oxopropyl) 2,3-dimethyl quinoline-2,3,4-tricarboxylate (4ab):** light yellow solid (Yield: 61 %, 102.48 mg),  $^1\text{H}$  NMR (400 MHz, Chloroform- $d$ )  $\delta$  8.26 (d,  $J = 4.1$  Hz, 1H), 8.01 (d,  $J = 8.3$  Hz, 1H), 7.88 (ddd,  $J = 8.4, 7.0, 1.3$  Hz, 1H), 7.73 (ddd,  $J = 8.3, 7.0, 1.2$  Hz, 1H), 7.02 (d,  $J = 7.2$  Hz, 1H), 5.61 (s, 1H), 4.90 (dd,  $J = 11.0, 4.5$  Hz, 1H), 4.65 (dd,  $J = 11.0, 5.1$  Hz, 1H), 4.58 (s, 1H), 4.54 – 4.48 (m, 1H), 4.04 (s, 3H), 3.98 (s, 3H), 3.60 (s, 3H), 1.45 (s, 9H), 1.29 (d,  $J = 7.2$  Hz, 3H).

$^{13}\text{C}$  NMR (101 MHz, Chloroform- $d$ )  $\delta$  171.66, 167.44, 165.35, 164.13, 154.41, 146.77, 146.61, 139.08, 131.43, 129.46, 129.29, 124.76, 122.62, 121.43, 79.94, 64.73, 52.64, 52.51, 51.38, 47.28, 27.23, 17.13. HRMS (ESI) cald. for  $(\text{M}+\text{H})^+$   $\text{C}_{26}\text{H}_{32}\text{N}_3\text{O}_{11}$ :5618.1992 found,561.1988.

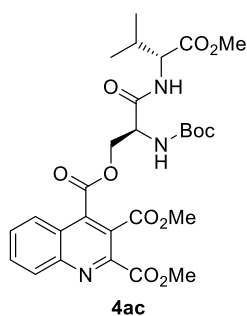

**4-((S)-2-((tert-butoxycarbonyl)amino)-3-(((R)-1-methoxy-3-methyl-1-oxobutan-2-**

**yl)amino)-3-oxopropyl) 2,3-dimethyl quinoline-2,3,4-tricarboxylate (4ac):** white solid (Yield:

58 %, 102.46 mg),  $^1\text{H}$  NMR (400 MHz, Chloroform-d)  $\delta$  8.27 (d,  $J = 8.3$  Hz, 1H), 8.00 (d,  $J = 8.2$  Hz, 1H), 7.89 (ddd,  $J = 8.4, 7.0, 1.3$  Hz, 1H), 7.74 (ddd,  $J = 8.3, 7.0, 1.2$  Hz, 1H), 6.95 (d,  $J = 8.6$  Hz, 1H), 5.68 (s, 1H), 4.92 (dd,  $J = 11.0, 4.6$  Hz, 1H), 4.70 (dd,  $J = 11.0, 4.9$  Hz, 1H), 4.58 (s, 1H), 4.45 (dd,  $J = 8.8, 5.0$  Hz, 1H), 4.05 (s, 3H), 4.00 (s, 3H), 3.58 (s, 3H), 2.02 (dt,  $J = 13.3, 6.6$  Hz, 1H), 1.47 (s, 9H), 0.70 (d,  $J = 6.5$  Hz, 6H).  $^{13}\text{C}$  NMR (101 MHz, Chloroform-d)  $\delta$  171.64, 168.87, 166.43, 165.72, 165.18, 155.49, 147.80, 147.62, 140.32, 132.49, 130.47, 130.30, 125.78, 123.58, 122.30, 80.86, 65.69, 64.89, 57.30, 53.67, 53.52, 52.05, 31.14, 28.26, 18.65, 17.40. HRMS (ESI) cald. for  $(\text{M}+\text{H})^+$   $\text{C}_{28}\text{H}_{36}\text{N}_3\text{O}_{11}$ :590.2305,found,590.2300.

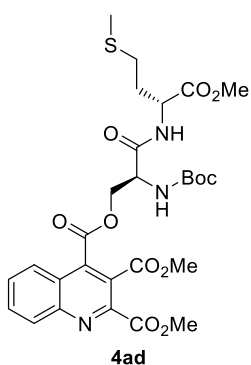

**4-((S)-2-((tert-butoxycarbonyl)amino)-3-(((R)-1-methoxy-4-(methylthio)-1-oxobutan-2-yl)amino)-3-oxopropyl) 2,3-dimethyl quinoline-2,3,4-tricarboxylate (4ad):** yellow solid (Yield: 62 %, 115.46 mg),  $^1\text{H}$  NMR (400 MHz, Chloroform-d)  $\delta$  8.29 (d,  $J = 8.5$  Hz, 1H), 8.02 (d,  $J = 8.4$  Hz, 1H), 7.91 (t,  $J = 7.7$  Hz, 1H), 7.77 (t,  $J = 7.7$  Hz, 1H), 7.15 (d,  $J = 7.9$  Hz, 1H), 5.70 (s, 1H), 4.93 (dd,  $J = 11.0, 4.4$  Hz, 1H), 4.72 (dd,  $J = 11.0, 4.9$  Hz, 1H), 4.66 (dt,  $J = 7.7, 3.8$  Hz, 1H), 4.61 (d,  $J = 8.6$  Hz, 1H), 4.06 (s, 3H), 4.02 (s, 3H), 3.62 (s, 3H), 2.29 (d,  $J = 6.5$  Hz, 2H), 2.10 – 2.02 (m, 1H), 1.92 – 1.87 (m, 1H), 1.84 (s, 3H), 1.48 (s, 9H).  $^{13}\text{C}$  NMR (101 MHz, Chloroform-d)  $\delta$  171.63, 168.78, 166.59, 165.67, 165.16, 155.42, 147.66, 140.09, 132.49, 130.53, 130.39, 128.78, 127.46, 125.70, 123.61, 80.87, 65.76, 53.72, 53.54, 52.45, 51.67, 31.38, 29.69, 29.58, 28.27, 15.16. HRMS (ESI) cald. for  $(\text{M}+\text{Na})^+$   $\text{C}_{28}\text{H}_{35}\text{N}_3\text{NaO}_{11}\text{S}$ :644.1885,found, 644.1910.

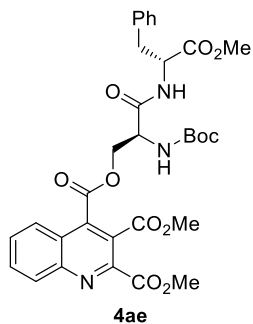

**4-((S)-2-((tert-butoxycarbonyl)amino)-3-(((R)-1-methoxy-1-oxo-3-phenylpropan-2-yl)amino)-3-oxopropyl) 2,3-dimethyl quinoline-2,3,4-tricarboxylate (4ae):** white solid (Yield: 53 %, 101.26 mg),  $^1\text{H}$  NMR (400 MHz, Chloroform-d)  $\delta$  8.27 (d,  $J = 8.3$  Hz, 1H), 8.00 (d,  $J = 8.3$  Hz, 1H), 7.89 (ddd,  $J = 8.4, 7.0, 1.3$  Hz, 1H), 7.74 (ddd,  $J = 8.3, 7.0, 1.2$  Hz, 1H), 7.13 (s, 1H), 7.00 (d,  $J = 7.4$  Hz, 2H), 6.95 – 6.84 (m, 3H), 5.58 (s, 1H), 4.88 (dd,  $J = 11.0, 4.2$  Hz, 1H), 4.81 – 4.76 (m, 1H), 4.67 (dd,  $J = 11.0, 4.9$  Hz, 1H), 4.56 (s, 1H), 4.05 (s, 3H), 3.97 (s, 3H), 3.59 (s, 3H), 3.00 (t,  $J = 6.3$  Hz, 2H), 1.44 (s, 9H).  $^{13}\text{C}$  NMR (101 MHz, Chloroform-d)  $\delta$  171.20, 168.57, 166.25, 165.75, 165.19, 155.39, 147.91, 147.66, 140.24, 135.47, 132.51, 130.50, 130.32, 129.02, 128.33, 126.98, 125.77, 123.64, 122.28, 80.81, 65.67, 60.41, 53.64, 53.53, 53.44, 52.27, 37.69, 28.24. HRMS (ESI) calcd. for (M+H) $^+$  C<sub>32</sub>H<sub>36</sub>N<sub>3</sub>O<sub>11</sub>:638.2305, found, 638.2310.

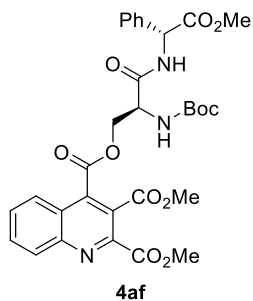

**4-((S)-2-((tert-butoxycarbonyl)amino)-3-(((R)-2-methoxy-2-oxo-1-phenylethyl)amino)-3-oxopropyl) 2,3-dimethyl quinoline-2,3,4-tricarboxylate (4f):** light yellow oil (Yield: 50 %, 93.45 mg),  $^1\text{H}$  NMR (400 MHz, Chloroform-d)  $\delta$  8.28 (d,  $J = 8.2$  Hz, 1H), 7.96 – 7.86 (m, 2H), 7.68 (ddd,  $J = 8.3, 7.0, 1.2$  Hz, 1H), 7.33 (s, 1H), 7.16 (d,  $J = 7.1$  Hz, 2H), 7.07 (t,  $J = 7.3$  Hz, 1H), 7.00 (t,  $J = 7.3$  Hz, 2H), 5.72 (s, 1H), 5.48 (d,  $J = 7.2$  Hz, 1H), 4.89 (dd,  $J = 11.0, 4.2$  Hz, 1H), 4.70 (dd,  $J = 11.0, 4.7$  Hz, 1H), 4.62 (s, 1H), 4.06 (s, 3H), 3.96 (s, 3H), 3.61 (s, 3H), 1.46 (s, 9H).  $^{13}\text{C}$

NMR (101 MHz, Chloroform-d)  $\delta$  170.59, 168.35, 166.44, 165.75, 155.47, 147.65, 135.92, 132.51, 130.41, 130.33, 128.61, 128.36, 126.91, 125.78, 123.60, 80.91, 65.85, 56.49, 53.68, 53.54, 53.41, 52.80, 28.25. HRMS (ESI) cald. for (M+H)<sup>+</sup> C<sub>31</sub>H<sub>34</sub>N<sub>3</sub>O<sub>11</sub>:624.2149,found, 624.2140.

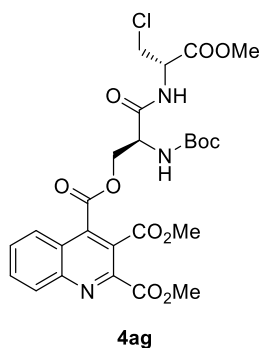

**4-((S)-2-((tert-butoxycarbonyl)amino)-3-(((S)-3-chloro-1-methoxy-1-oxopropan-2-yl)amino)-3-oxopropyl) 2,3-dimethyl quinoline-2,3,4-tricarboxylate (4ag):** yellow oil (Yield: 61 %, 110.64 mg), <sup>1</sup>H NMR (400 MHz, Chloroform-d)  $\delta$  8.26 (d, J = 8.5 Hz, 1H), 7.98 (d, J = 8.5 Hz, 1H), 7.88 (ddd, J = 8.4, 7.0, 1.3 Hz, 1H), 7.73 (ddd, J = 8.2, 7.0, 1.1 Hz, 1H), 7.31 (d, J = 7.7 Hz, 1H), 5.68 (s, 1H), 4.92 (dq, J = 6.6, 3.8, 3.0 Hz, 2H), 4.77 – 4.59 (m, 2H), 4.04 (s, 4H), 3.99 (s, 3H), 3.88 – 3.78 (m, 2H), 3.66 (s, 3H), 1.46 (s, 9H). <sup>13</sup>C NMR (101 MHz, Chloroform-d)  $\delta$  168.99, 168.69, 166.17, 165.79, 165.21, 155.44, 148.04, 147.64, 140.29, 132.48, 130.48, 130.24, 125.72, 123.61, 122.14, 80.98, 65.48, 53.67, 53.50, 53.20, 52.97, 44.59, 28.24. HRMS (ESI) cald. for (M+H)<sup>+</sup> C<sub>26</sub>H<sub>31</sub>ClN<sub>3</sub>O<sub>11</sub>:596.1642,found, 596.1662.

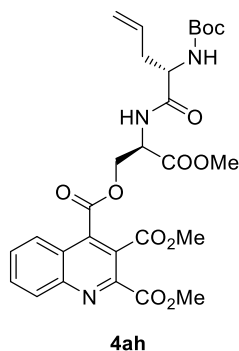

**4-((R)-2-((S)-2-((tert-butoxycarbonyl)amino)pent-4-enamido)-3-methoxy-3-oxopropyl)2,3-dimethyl quinoline-2,3,4-tricarboxylate (4ah):** yellow oil (Yield: 62 %, 109.15 mg), <sup>1</sup>H NMR

(400 MHz, Chloroform-d)  $\delta$  8.24 (d,  $J = 8.4$  Hz, 1H), 7.94 – 7.83 (m, 2H), 7.72 (td,  $J = 7.6, 7.1, 1.1$  Hz, 1H), 7.25 (d,  $J = 4.5$  Hz, 1H), 5.78 – 5.66 (m, 1H), 5.22 (s, 1H), 5.12 – 5.01 (m, 3H), 4.97 (s, 1H), 4.69 (dd,  $J = 11.2, 2.8$  Hz, 1H), 4.29 (s, 1H), 4.02 (s, 3H), 3.98 (s, 3H), 3.73 (s, 3H), 2.58 (dt,  $J = 12.6, 6.0$  Hz, 1H), 2.47 (dt,  $J = 14.3, 7.1$  Hz, 1H), 1.37 (s, 9H).  $^{13}\text{C}$  NMR (101 MHz, Chloroform-d)  $\delta$  171.72, 169.15, 166.13, 165.80, 165.01, 155.38, 148.13, 147.63, 140.35, 132.93, 132.53, 130.53, 130.28, 125.49, 123.53, 121.88, 118.95, 80.00, 65.49, 53.89, 53.81, 53.51, 53.00, 51.74, 36.90, 28.22. HRMS (ESI) cald. for (M+H)<sup>+</sup> C<sub>28</sub>H<sub>34</sub>N<sub>3</sub>O<sub>11</sub>:588.2149,found, 588.2158.

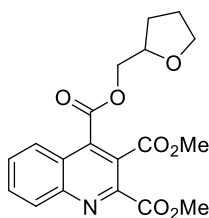

**4aj**

**2,3-dimethyl 4-((tetrahydrofuran-2-yl)methyl) quinoline-2,3,4-tricarboxylate (4aj):** light yellow liquid (Yield: 80 %, 89.30 mg),  $^1\text{H}$  NMR (400 MHz, Chloroform-d)  $\delta$  8.23 (d,  $J = 8.4$  Hz, 1H), 8.09 (d,  $J = 8.3$  Hz, 1H), 7.84 (ddd,  $J = 8.3, 6.8, 1.1$  Hz, 1H), 7.70 (ddd,  $J = 8.1, 6.7, 0.9$  Hz, 1H), 4.52 (dd,  $J = 11.4, 3.5$  Hz, 1H), 4.35 (dd,  $J = 11.4, 6.6$  Hz, 1H), 4.22 (qd,  $J = 6.9, 3.6$  Hz, 1H), 4.01 (s, 3H), 3.93 (s, 3H), 3.85 (q,  $J = 7.5, 6.8$  Hz, 1H), 3.76 (q,  $J = 7.7, 7.2$  Hz, 1H), 2.03 (dt,  $J = 12.3, 6.3$  Hz, 1H), 1.87 (p,  $J = 6.5, 5.6$  Hz, 2H), 1.66 (dq,  $J = 12.2, 7.3$  Hz, 1H).  $^{13}\text{C}$  NMR (101 MHz, Chloroform-d)  $\delta$  165.89, 165.75, 165.45, 147.78, 147.58, 140.18, 132.22, 130.46, 130.16, 125.80, 123.83, 123.02, 75.96, 68.47, 68.39, 53.49, 53.35, 27.95, 25.70. HRMS (ESI) cald. for (M+H)<sup>+</sup> C<sub>19</sub>H<sub>20</sub>NO<sub>7</sub>:374.1195,found, 374.1193.

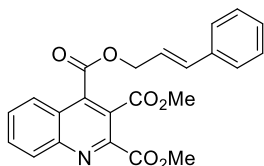

**4ak**

**4-cinnamyl 2,3-dimethyl quinoline-2,3,4-tricarboxylate (4ak):** yellow liquid (Yield: 72 %, 89.30 mg),  $^1\text{H}$  NMR (400 MHz, Chloroform-d)  $\delta$  8.23 (d,  $J = 8.4$  Hz, 1H), 8.09 (d,  $J = 8.3$  Hz, 1H), 7.84 (ddd,  $J = 8.3, 6.8, 1.1$  Hz, 1H), 7.70 (ddd,  $J = 8.1, 6.7, 0.9$  Hz, 1H), 7.25 (d,  $J = 4.5$  Hz, 1H), 7.15 (d,  $J = 4.5$  Hz, 1H), 7.05 (d,  $J = 4.5$  Hz, 1H), 6.95 (d,  $J = 4.5$  Hz, 1H), 6.85 (d,  $J = 4.5$  Hz, 1H), 6.75 (d,  $J = 4.5$  Hz, 1H), 6.65 (d,  $J = 4.5$  Hz, 1H), 6.55 (d,  $J = 4.5$  Hz, 1H), 6.45 (d,  $J = 4.5$  Hz, 1H), 6.35 (d,  $J = 4.5$  Hz, 1H), 6.25 (d,  $J = 4.5$  Hz, 1H), 6.15 (d,  $J = 4.5$  Hz, 1H), 6.05 (d,  $J = 4.5$  Hz, 1H), 5.95 (d,  $J = 4.5$  Hz, 1H), 5.85 (d,  $J = 4.5$  Hz, 1H), 5.75 (d,  $J = 4.5$  Hz, 1H), 5.65 (d,  $J = 4.5$  Hz, 1H), 5.55 (d,  $J = 4.5$  Hz, 1H), 5.45 (d,  $J = 4.5$  Hz, 1H), 5.35 (d,  $J = 4.5$  Hz, 1H), 5.25 (d,  $J = 4.5$  Hz, 1H), 5.15 (d,  $J = 4.5$  Hz, 1H), 5.05 (d,  $J = 4.5$  Hz, 1H), 4.95 (d,  $J = 4.5$  Hz, 1H), 4.85 (d,  $J = 4.5$  Hz, 1H), 4.75 (d,  $J = 4.5$  Hz, 1H), 4.65 (d,  $J = 4.5$  Hz, 1H), 4.55 (d,  $J = 4.5$  Hz, 1H), 4.45 (d,  $J = 4.5$  Hz, 1H), 4.35 (d,  $J = 4.5$  Hz, 1H), 4.25 (d,  $J = 4.5$  Hz, 1H), 4.15 (d,  $J = 4.5$  Hz, 1H), 4.05 (d,  $J = 4.5$  Hz, 1H), 3.95 (d,  $J = 4.5$  Hz, 1H), 3.85 (d,  $J = 4.5$  Hz, 1H), 3.75 (d,  $J = 4.5$  Hz, 1H), 3.65 (d,  $J = 4.5$  Hz, 1H), 3.55 (d,  $J = 4.5$  Hz, 1H), 3.45 (d,  $J = 4.5$  Hz, 1H), 3.35 (d,  $J = 4.5$  Hz, 1H), 3.25 (d,  $J = 4.5$  Hz, 1H), 3.15 (d,  $J = 4.5$  Hz, 1H), 3.05 (d,  $J = 4.5$  Hz, 1H), 2.95 (d,  $J = 4.5$  Hz, 1H), 2.85 (d,  $J = 4.5$  Hz, 1H), 2.75 (d,  $J = 4.5$  Hz, 1H), 2.65 (d,  $J = 4.5$  Hz, 1H), 2.55 (d,  $J = 4.5$  Hz, 1H), 2.45 (d,  $J = 4.5$  Hz, 1H), 2.35 (d,  $J = 4.5$  Hz, 1H), 2.25 (d,  $J = 4.5$  Hz, 1H), 2.15 (d,  $J = 4.5$  Hz, 1H), 2.05 (d,  $J = 4.5$  Hz, 1H), 1.95 (d,  $J = 4.5$  Hz, 1H), 1.85 (d,  $J = 4.5$  Hz, 1H), 1.75 (d,  $J = 4.5$  Hz, 1H), 1.65 (d,  $J = 4.5$  Hz, 1H), 1.55 (d,  $J = 4.5$  Hz, 1H), 1.45 (d,  $J = 4.5$  Hz, 1H), 1.35 (d,  $J = 4.5$  Hz, 1H), 1.25 (d,  $J = 4.5$  Hz, 1H), 1.15 (d,  $J = 4.5$  Hz, 1H), 1.05 (d,  $J = 4.5$  Hz, 1H), 0.95 (d,  $J = 4.5$  Hz, 1H), 0.85 (d,  $J = 4.5$  Hz, 1H), 0.75 (d,  $J = 4.5$  Hz, 1H), 0.65 (d,  $J = 4.5$  Hz, 1H), 0.55 (d,  $J = 4.5$  Hz, 1H), 0.45 (d,  $J = 4.5$  Hz, 1H), 0.35 (d,  $J = 4.5$  Hz, 1H), 0.25 (d,  $J = 4.5$  Hz, 1H), 0.15 (d,  $J = 4.5$  Hz, 1H), 0.05 (d,  $J = 4.5$  Hz, 1H).  $^{13}\text{C}$  NMR (101 MHz, Chloroform-d)  $\delta$  165.89, 165.75, 165.45, 147.78, 147.58, 140.18, 132.22, 130.46, 130.16, 125.80, 123.83, 123.02, 75.96, 68.47, 68.39, 53.49, 53.35, 27.95, 25.70. HRMS (ESI) cald. for (M+H)<sup>+</sup> C<sub>28</sub>H<sub>28</sub>N<sub>3</sub>O<sub>7</sub>:500.1995,found, 500.1993.



89.30 mg),  $^1\text{H}$  NMR (400 MHz, Chloroform- $d$ )  $\delta$  8.28 (d,  $J$  = 8.1 Hz, 1H), 8.11 (d,  $J$  = 8.5 Hz, 1H), 7.87 (ddd,  $J$  = 8.4, 7.0, 1.3 Hz, 1H), 7.73 (ddd,  $J$  = 8.3, 7.0, 1.2 Hz, 1H), 7.42 (d,  $J$  = 7.1 Hz, 2H), 7.33 (t,  $J$  = 7.3 Hz, 2H), 7.28 (d,  $J$  = 7.1 Hz, 1H), 6.79 (d,  $J$  = 15.9 Hz, 1H), 6.41 (dt,  $J$  = 15.9, 6.6 Hz, 1H), 5.12 (d,  $J$  = 7.7 Hz, 2H), 4.04 (s, 3H), 3.89 (s, 3H).  $^{13}\text{C}$  NMR (101 MHz, Chloroform- $d$ )  $\delta$  166.02, 165.68, 165.21, 147.61, 139.79, 135.82, 135.72, 132.22, 130.61, 130.27, 128.76, 128.48, 126.75, 125.65, 123.87, 123.40, 121.63, 67.29, 53.58, 53.35. HRMS (ESI) calcd. for  $(\text{M}+\text{H})^+$   $\text{C}_{23}\text{H}_{20}\text{NO}_6$ :406.1246,found, 406.1243.

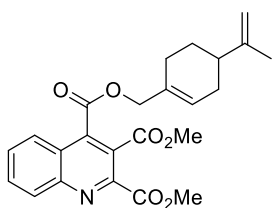

4al

**2,3-dimethyl 4-((4-(prop-1-en-2-yl)cyclohex-1-en-1-yl)methyl) quinoline-2,3,4-tricarboxylate (4al):** yellow liquid (Yield: 72 %, 101.32 mg),  $^1\text{H}$  NMR (400 MHz, Chloroform- $d$ )  $\delta$  8.27 (d,  $J$  = 8.4 Hz, 1H), 8.07 (d,  $J$  = 8.5 Hz, 1H), 7.90 – 7.85 (m, 1H), 7.73 (t,  $J$  = 7.7 Hz, 1H), 5.90 (s, 1H), 4.83 (d,  $J$  = 5.6 Hz, 2H), 4.70 (d,  $J$  = 10.1 Hz, 2H), 4.04 (s, 3H), 3.94 (s, 3H), 2.23 – 2.10 (m, 9H), 2.03 – 1.94 (m, 1H), 1.85 (d,  $J$  = 16.5 Hz, 1H), 1.71 (s, 3H), 1.48 (ddd,  $J$  = 20.1, 12.7, 8.6 Hz, 1H).  $^{13}\text{C}$  NMR (101 MHz, Chloroform- $d$ )  $\delta$  165.94, 165.73, 165.38, 149.26, 147.76, 147.63, 140.20, 132.14, 131.65, 130.58, 130.11, 127.88, 125.67, 123.90, 123.13, 108.96, 70.95, 53.50, 53.26, 40.62, 30.51, 27.23, 26.50, 20.76. HRMS (ESI) calcd. for  $(\text{M}+\text{H})^+$   $\text{C}_{24}\text{H}_{26}\text{NO}_6$ : 424.1755,found, 424.1760.

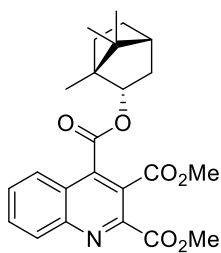

4am

**2,3-dimethyl 4-((1R,2S,4R)-1,7,7-trimethylbicyclo[2.2.1]heptan-2-yl) quinoline-2,3,4-**

**tricarboxylate (4am):** yellow solid (Yield: 40%, 50.72 mg),  $^1\text{H}$  NMR (400 MHz, Chloroform-*d*)  $\delta$  8.27 (d,  $J = 8.5$  Hz, 1H), 7.99 (d,  $J = 8.5$  Hz, 1H), 7.87 (ddd,  $J = 8.4, 6.9, 1.4$  Hz, 1H), 7.72 (ddd,  $J = 8.3, 6.9, 1.2$  Hz, 1H), 5.06 (t,  $J = 5.8$  Hz, 1H), 4.04 (s, 3H), 3.93 (s, 3H), 2.03 (d,  $J = 5.8$  Hz, 2H), 1.84 – 1.69 (m, 2H), 1.63 (td,  $J = 12.1, 11.6, 3.8$  Hz, 1H), 1.26 (d,  $J = 13.1$  Hz, 2H), 0.93 (s, 3H), 0.83 (d,  $J = 7.0$  Hz, 6H).  $^{13}\text{C}$  NMR (101 MHz, Chloroform-*d*)  $\delta$  165.91, 165.66, 165.26, 148.13, 147.59, 141.15, 132.14, 130.58, 129.96, 125.47, 123.83, 122.31, 84.40, 53.48, 53.20, 48.95, 47.07, 45.13, 38.59, 33.85, 27.01, 20.01, 19.78, 11.76. HRMS (ESI) calcd. for (M+H)<sup>+</sup> C<sub>24</sub>H<sub>28</sub>NO<sub>6</sub>:426.1872,found, 426.1877.

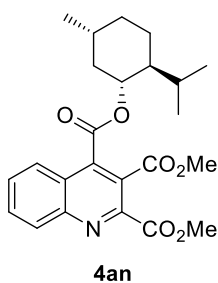

**4-((1R,2S,5R)-2-isopropyl-5-methylcyclohexyl) 2,3-dimethyl quinoline-2,3,4-tricarboxylate (4an):** yellow solid (Yield: 42%, 53.82 mg),  $^1\text{H}$  NMR (400 MHz, Chloroform-*d*)  $\delta$  8.28 (d,  $J = 8.1$  Hz, 1H), 8.02 (d,  $J = 9.1$  Hz, 1H), 7.88 (ddd,  $J = 8.4, 6.9, 1.3$  Hz, 1H), 7.74 (ddd,  $J = 8.3, 6.9, 1.2$  Hz, 1H), 5.11 (td,  $J = 10.9, 4.4$  Hz, 1H), 4.05 (s, 3H), 3.95 (s, 3H), 2.37 (d,  $J = 11.7$  Hz, 1H), 1.96 (td,  $J = 7.0, 2.6$  Hz, 1H), 1.74 (d,  $J = 12.5$  Hz, 2H), 1.68 – 1.56 (m, 2H), 1.47 (t,  $J = 11.6$  Hz, 1H), 1.21 – 1.11 (m, 2H), 1.00 (d,  $J = 6.5$  Hz, 3H), 0.88 (t,  $J = 7.4$  Hz, 6H).  $^{13}\text{C}$  NMR (101 MHz, Chloroform-*d*)  $\delta$  165.84, 165.20, 147.73, 147.58, 140.73, 132.02, 130.66, 130.01, 125.47, 123.92, 122.84, 77.63, 53.49, 53.17, 46.87, 40.54, 34.08, 31.56, 25.80, 23.03, 22.09, 20.80, 15.96. HRMS (ESI) calcd. for (M+H)<sup>+</sup> C<sub>24</sub>H<sub>30</sub>NO<sub>6</sub>:428.2028,found, 428.2022.

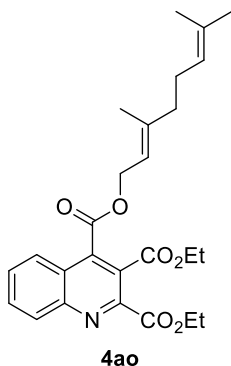

**(E)-4-(3,7-dimethylocta-2,6-dien-1-yl) 2,3-diethyl quinoline-2,3,4-tricarboxylate (4ao):**

yellow liquid (Yield: 70 %, 95.02 mg),  $^1\text{H}$  NMR (400 MHz, Chloroform-*d*)  $\delta$  8.26 (d,  $J = 8.3$  Hz, 1H), 8.03 (d,  $J = 8.4$  Hz, 1H), 7.86 (ddd,  $J = 8.4, 6.9, 1.3$  Hz, 1H), 7.71 (ddd,  $J = 8.3, 6.9, 1.2$  Hz, 1H), 5.49 (t,  $J = 7.2$  Hz, 1H), 5.12 – 5.06 (m, 1H), 4.98 (d,  $J = 7.2$  Hz, 2H), 4.50 (q,  $J = 7.1$  Hz, 2H), 4.40 (q,  $J = 7.2$  Hz, 2H), 2.10 (p,  $J = 8.5, 7.5$  Hz, 4H), 1.79 (s, 3H), 1.66 (s, 3H), 1.59 (s, 3H), 1.41 (dt,  $J = 22.3, 7.2$  Hz, 6H).  $^{13}\text{C}$  NMR (101 MHz, Chloroform-*d*)  $\delta$  165.66, 165.55, 165.30, 148.69, 147.63, 144.15, 140.57, 132.04, 132.01, 130.50, 129.79, 125.62, 123.81, 123.54, 122.63, 117.13, 63.46, 62.64, 62.45, 39.61, 26.29, 25.68, 17.70, 16.65, 14.13, 13.95. HRMS (ESI) calcd. for (M+H) $^+$  C<sub>26</sub>H<sub>32</sub>NO<sub>6</sub>:454.2185, found, 454.2194.

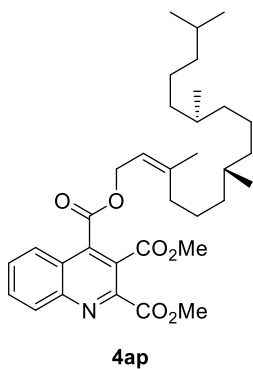

**2,3-dimethyl 4-((7S,11R,Z)-3,7,11,15-tetramethylhexadec-2-en-1-yl) quinoline-2,3,4-**

**tricarboxylate (4ap):** yellow liquid (Yield: 65 %, 115.92 mg),  $^1\text{H}$  NMR (400 MHz, Chloroform-

*d*)  $\delta$  8.26 (d,  $J = 8.5$  Hz, 1H), 8.07 (d,  $J = 8.5$  Hz, 1H), 7.87 (ddd,  $J = 8.4, 7.0, 1.3$  Hz, 1H), 7.72

(ddd,  $J = 8.2, 7.0, 1.2$  Hz, 1H), 5.48 (t,  $J = 7.3$  Hz, 1H), 4.98 (d,  $J = 7.3$  Hz, 2H), 4.04 (s, 3H), 3.93

(s, 3H), 2.05 (t,  $J = 7.1$  Hz, 2H), 1.78 (s, 3H), 1.52 – 1.35 (m, 4H), 1.32 – 1.19 (m, 8H), 1.18 –

0.97 (m, 7H), 0.85 – 0.81 (m, 12H). <sup>13</sup>C NMR (101 MHz, Chloroform-*d*) δ 165.90, 165.72, 165.45, 147.74, 147.61, 144.79, 140.30, 132.08, 130.55, 130.02, 125.71, 123.94, 123.10, 116.88, 63.57, 53.47, 53.15, 39.97, 39.36, 37.42, 37.34, 37.28, 36.68, 32.78, 32.69, 27.97, 25.09, 24.79, 24.46, 22.72, 22.63, 19.74, 19.69, 16.54. HRMS (ESI) cald. for (M+H)<sup>+</sup> C<sub>34</sub>H<sub>50</sub>NO<sub>6</sub>:568.3633,found, 568.3645.

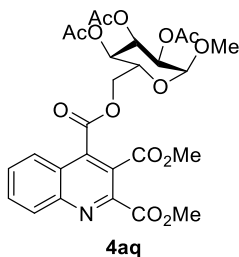

**2,3-dimethyl 4-(((2S,3S,4S,5S,6R)-3,4,5-triacetoxy-6-methoxytetrahydro-2H-pyran-2-yl)methyl) quinoline-2,3,4-tricarboxylate (4aq):** yellow oil (Yield: 53%, 93.82 mg), <sup>1</sup>H NMR (400 MHz, Chloroform-*d*) δ 8.27 (d, J = 8.5 Hz, 1H), 8.11 (d, J = 9.2 Hz, 1H), 7.89 (ddd, J = 8.4, 6.9, 1.4 Hz, 1H), 7.76 (ddd, J = 8.3, 6.9, 1.2 Hz, 1H), 5.52 – 5.47 (m, 1H), 5.04 – 4.99 (m, 1H), 4.95 (d, J = 3.5 Hz, 1H), 4.86 – 4.82 (m, 2H), 4.52 (d, J = 4.2 Hz, 2H), 4.13 – 4.09 (m, 1H), 4.03 (s, 3H), 3.95 (s, 3H), 3.34 (s, 3H), 2.04 (d, J = 4.4 Hz, 6H), 1.97 (s, 3H). <sup>13</sup>C NMR (101 MHz, Chloroform-*d*) δ 170.17, 170.06, 169.68, 165.74, 165.71, 165.19, 147.83, 147.66, 139.72, 132.33, 130.55, 130.22, 125.79, 123.77, 123.06, 96.68, 70.73, 69.85, 69.03, 66.94, 64.59, 55.71, 53.51, 53.36, 20.70, 20.66. HRMS (ESI) cald. for (M+H)<sup>+</sup> C<sub>27</sub>H<sub>30</sub>NO<sub>14</sub>:592.1622,found, 592.1618.

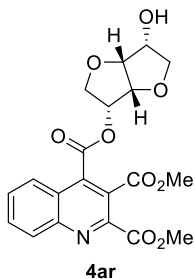

**4-((3R,3aR,6R,6aR)-6-hydroxyhexahydrofuro[3,2-b]furan-3-yl) 2,3-dimethyl quinoline-2,3,4-tricarboxylate (4ar):** yellow solid (Yield: 67%, 53.82 mg), <sup>1</sup>H NMR (400 MHz, Chloroform-*d*) δ 8.24 (t, J = 8.3 Hz, 2H), 7.87 (ddd, J = 8.6, 6.9, 1.5 Hz, 1H), 7.73 (ddd, J = 8.2,

6.9, 1.3 Hz, 1H), 5.49 (q, J = 5.9 Hz, 1H), 4.91 (t, J = 5.3 Hz, 1H), 4.52 (t, J = 5.2 Hz, 1H), 4.29 (s, 1H), 4.18 (dd, J = 9.9, 6.1 Hz, 1H), 4.03 (s, 3H), 4.00 – 3.94 (m, 2H), 3.93 (s, 3H), 3.85 (d, J = 5.8 Hz, 1H), 3.46 (dd, J = 9.1, 7.4 Hz, 1H). <sup>13</sup>C NMR (101 MHz, Chloroform-d) δ 165.81, 164.88, 147.79, 147.64, 139.90, 132.42, 130.38, 130.22, 126.07, 123.81, 122.63, 95.16, 81.77, 80.46, 76.23, 73.61, 72.18, 70.78, 53.51, 53.30. HRMS (ESI) calcd. for (M+H)<sup>+</sup> C<sub>20</sub>H<sub>20</sub>NO<sub>9</sub>: 418.1093, found, 418.1095.

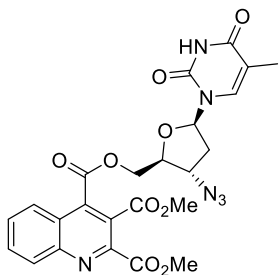

4as

**4-(((2*S*,3*S*,5*R*)-3-azido-5-(5-methyl-2,4-dioxo-3,4-dihydropyrimidin-1(2H)-**

**yl)tetrahydrofuran-2-yl)methyl) 2,3-dimethyl quinoline-2,3,4-tricarboxylate (4as):** yellow solid (Yield: 48%, 77.47 mg), <sup>1</sup>H NMR (400 MHz, Chloroform-d) δ 9.18 (s, 1H), 8.30 (d, J = 8.4 Hz, 1H), 7.98 (d, J = 8.4 Hz, 1H), 7.91 (t, J = 7.7 Hz, 1H), 7.75 (t, J = 7.2 Hz, 1H), 7.01 (s, 1H), 6.21 – 6.11 (m, 1H), 4.84 (dd, J = 12.3, 3.7 Hz, 1H), 4.69 (dd, J = 12.3, 3.1 Hz, 1H), 4.39 (q, J = 6.4 Hz, 1H), 4.11 (dt, J = 6.4, 3.4 Hz, 1H), 4.05 (s, 3H), 3.94 (s, 3H), 2.49 – 2.33 (m, 2H), 1.35 (s, 3H). <sup>13</sup>C NMR (101 MHz, Chloroform-d) δ 166.04, 165.59, 165.30, 163.52, 150.19, 147.89, 147.66, 139.89, 135.20, 132.65, 130.79, 130.56, 125.23, 123.47, 122.70, 111.50, 84.89, 81.22, 64.57, 59.50, 53.59, 37.35, 29.69, 11.78. HRMS (ESI) calcd. for (M+H)<sup>+</sup> C<sub>24</sub>H<sub>23</sub>N<sub>6</sub>O<sub>9</sub>: 539.1482, found, 539.1485.

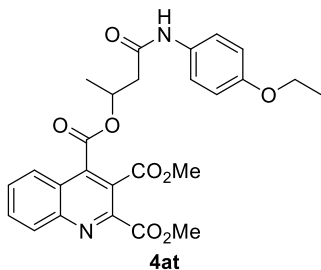

4at

**4-(4-((4-ethoxyphenyl)amino)-4-oxobutan-2-yl) 2,3-dimethyl quinoline-2,3,4-tricarboxylate**

**(4at):** light yellow solid (Yield: 48%, 111.07 mg),  $^1\text{H}$  NMR (400 MHz, Chloroform-d)  $\delta$  8.21 (d,  $J = 8.4$  Hz, 1H), 7.95 (d,  $J = 8.0$  Hz, 1H), 7.88 (s, 1H), 7.79 (t,  $J = 7.7$  Hz, 1H), 7.49 (t,  $J = 7.7$  Hz, 1H), 7.33 (d,  $J = 9.0$  Hz, 2H), 6.76 (d,  $J = 9.0$  Hz, 2H), 5.88 – 5.75 (m, 1H), 4.04 (s, 3H), 3.97 (t,  $J = 7.0$  Hz, 2H), 3.93 (s, 3H), 2.79 – 2.63 (m, 2H), 1.53 (d,  $J = 6.4$  Hz, 3H), 1.37 (t,  $J = 7.0$  Hz, 3H).  $^{13}\text{C}$  NMR (101 MHz, Chloroform-d)  $\delta$  167.21, 166.48, 165.77, 164.88, 155.73, 147.59, 147.52, 140.73, 132.33, 130.89, 130.36, 130.25, 125.73, 123.62, 122.41, 121.55, 114.64, 71.37, 63.68, 53.46, 43.55, 19.56, 14.38. HRMS (ESI) calcd. for  $(\text{M}+\text{H})^+$   $\text{C}_{26}\text{H}_{27}\text{N}_2\text{O}_8$ :495.1723,found, 495.1728.

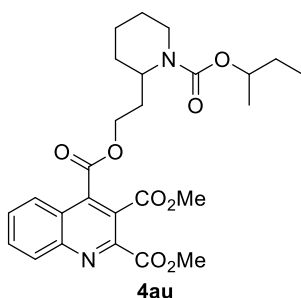

**4-(2-(1-(sec-butoxycarbonyl)piperidin-2-yl)ethyl) 2,3-dimethyl quinoline-2,3,4-**

**tricarboxylate (4au):** yellow oil (Yield: 67%, 100.32 mg),  $^1\text{H}$  NMR (400 MHz, Chloroform-d)  $\delta$  8.29 (d,  $J = 8.4$  Hz, 1H), 8.11 (d,  $J = 7.6$  Hz, 1H), 7.90 (t,  $J = 8.4$  Hz, 1H), 7.77 (t,  $J = 8.3$  Hz, 1H), 4.72 (q,  $J = 6.2$  Hz, 1H), 4.46 (s, 2H), 4.06 (s, 3H), 3.96 (s, 3H), 2.86 (t,  $J = 12.6$  Hz, 1H), 2.26 (ddd,  $J = 13.7, 9.8, 6.8$  Hz, 1H), 1.92 (dt,  $J = 13.8, 6.5$  Hz, 1H), 1.64 (q,  $J = 12.4$  Hz, 8H), 1.48 – 1.40 (m, 2H), 1.16 (d,  $J = 6.1$  Hz, 2H), 0.88 – 0.82 (m, 3H).  $^{13}\text{C}$  NMR (101 MHz, Chloroform-d)  $\delta$  165.94, 165.75, 165.48, 155.56, 147.74, 147.62, 140.35, 132.22, 130.55, 130.19, 125.84, 123.84, 123.04, 73.15, 73.08, 64.52, 53.52, 53.22, 47.76, 39.00, 32.15, 31.92, 29.37, 29.00, 19.73, 9.66. HRMS (ESI) calcd. for  $(\text{M}+\text{H})^+$   $\text{C}_{26}\text{H}_{33}\text{N}_2\text{O}_8$ :501.2192,found, 501.2188.

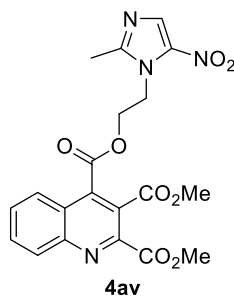

**2,3-dimethyl 4-(2-(2-methyl-5-nitro-1H-imidazol-1-yl)ethyl) quinoline-2,3,4-tricarboxylate**

**(4av):** yellow solid (Yield: 60%, 79.47 mg),  $^1\text{H}$  NMR (400 MHz, Chloroform-d)  $\delta$  8.27 (d,  $J = 8.5$  Hz, 1H), 7.97 (s, 1H), 7.89 (dd,  $J = 8.5, 4.2$  Hz, 1H), 7.71 (d,  $J = 3.7$  Hz, 2H), 4.81 (t,  $J = 5.3$  Hz, 2H), 4.70 (t,  $J = 5.3$  Hz, 2H), 4.03 (s, 3H), 3.88 (s, 3H), 2.33 (s, 3H).  $^{13}\text{C}$  NMR (101 MHz, Chloroform-d)  $\delta$  165.68, 165.68, 165.04, 151.23, 147.99, 147.64, 139.55, 133.24, 132.99, 132.59, 130.67, 130.47, 125.11, 123.35, 122.57, 64.69, 53.56, 53.43, 44.76, 14.28. HRMS (ESI) cald. for  $(\text{M}+\text{H})^+ \text{C}_{20}\text{H}_{19}\text{N}_4\text{O}_8$  : 443.1158, found, 443.1161.

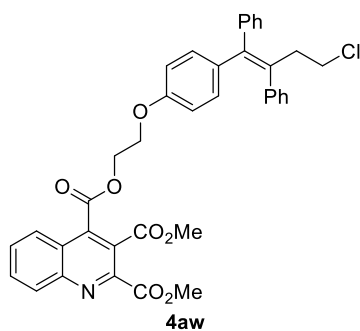

**(Z)-4-(2-(4-(4-chloro-1,2-diphenylbut-1-en-1-yl)phenoxy)ethyl) 2,3-dimethyl quinoline-**

**2,3,4-tricarboxylate (4aw):** white solid (Yield: 73%, 142.02 mg),  $^1\text{H}$  NMR (400 MHz, Chloroform-d)  $\delta$  8.29 – 8.22 (m, 1H), 8.06 (d,  $J = 8.4$  Hz, 1H), 7.83 (t,  $J = 7.3$  Hz, 1H), 7.58 (t,  $J = 7.7$  Hz, 1H), 7.39 – 7.34 (m, 2H), 7.29 (d,  $J = 7.3$  Hz, 3H), 7.15 (q,  $J = 6.9$  Hz, 5H), 6.82 (d,  $J = 8.7$  Hz, 2H), 6.60 (d,  $J = 8.7$  Hz, 2H), 4.83 – 4.70 (m, 2H), 4.23 – 4.15 (m, 2H), 4.03 (s, 3H), 3.85 (s, 3H), 3.41 (t,  $J = 7.3$  Hz, 2H), 2.92 (t,  $J = 7.4$  Hz, 2H).  $^{13}\text{C}$  NMR (101 MHz, Chloroform-d)  $\delta$  165.83, 165.75, 165.41, 156.43, 147.85, 147.61, 142.77, 141.63, 140.92, 140.01, 135.63, 135.56, 132.26, 131.87, 130.50, 130.21, 129.58, 129.41, 128.42, 128.26, 127.06, 126.67, 125.77, 123.78,

123.04, 113.56, 65.17, 64.71, 53.53, 53.38, 42.86, 38.54. HRMS (ESI) cald. for (M+H)<sup>+</sup> C<sub>38</sub>H<sub>33</sub>ClNO<sub>7</sub>:650.1940,found, 650.1948.

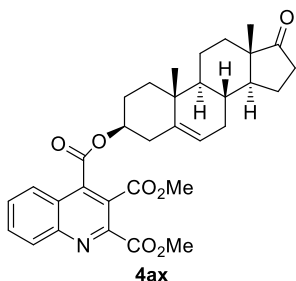

**4-((3*S*,8*R*,9*S*,10*R*,13*S*,14*S*)-10,13-dimethyl-17-oxo-2,3,4,7,8,9,10,11,12,13,14,15,16,17-tetradecahydro-1*H*-cyclopenta[*a*]phenanthren-3-yl)2,3-dimethylquinoline-2,3,4-**

**tricarboxylate (4ax):** yellow solid (Yield: 52%, 87.37 mg), <sup>1</sup>H NMR (400 MHz, Chloroform-*d*) δ 8.25 (d, *J* = 8.2 Hz, 1H), 8.04 (d, *J* = 8.5 Hz, 1H), 7.86 (ddd, *J* = 8.4, 6.9, 1.3 Hz, 1H), 7.72 (ddd, *J* = 8.3, 6.9, 1.2 Hz, 1H), 5.48 (d, *J* = 5.2 Hz, 1H), 5.03 (tt, *J* = 11.4, 4.8 Hz, 1H), 4.02 (s, 3H), 3.94 (s, 3H), 2.56 (ddd, *J* = 13.1, 5.1, 2.1 Hz, 1H), 2.48 – 2.40 (m, 2H), 2.17 – 2.05 (m, 3H), 1.97 – 1.89 (m, 3H), 1.82 (t, *J* = 9.3 Hz, 2H), 1.70 – 1.60 (m, 4H), 1.56 – 1.41 (m, 3H), 1.33 – 1.24 (m, 2H), 1.03 (s, 3H), 0.86 (s, 3H). <sup>13</sup>C NMR (101 MHz, Chloroform-*d*) δ 220.91, 165.85, 164.80, 147.76, 147.58, 140.53, 139.29, 132.12, 130.57, 130.08, 125.53, 123.81, 122.64, 120.81, 76.63, 53.46, 53.15, 51.67, 50.12, 47.50, 37.84, 36.87, 36.75, 35.82, 31.44, 31.39, 30.78, 30.76, 27.58, 21.86, 20.33, 19.30, 13.54. HRMS (ESI) cald. for (M+H)<sup>+</sup> C<sub>33</sub>H<sub>38</sub>NO<sub>7</sub>:560.2604,found, 560.26048.

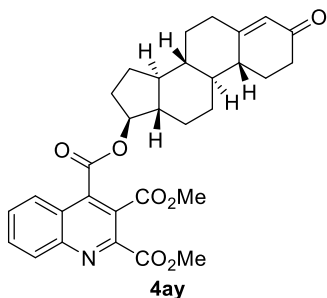

**2,3-dimethyl 4-((8*R*,9*S*,10*R*,13*S*,14*S*,17*S*)-3-oxo-2,3,6,7,8,9,10,11,12,13,14,15,16,17-tetradecahydro-1*H*-cyclopenta[*a*]phenanthren-17-yl) quinoline-2,3,4-tricarboxylate (4ay):**



yellow solid (Yield: 54%, 85.37 mg), <sup>1</sup>H NMR (400 MHz, Chloroform-d) δ 8.28 (d, J = 8.2 Hz, 1H), 8.00 (d, J = 7.8 Hz, 1H), 7.89 (ddd, J = 8.4, 6.9, 1.3 Hz, 1H), 7.74 (ddd, J = 8.3, 6.9, 1.2 Hz, 1H), 5.74 (s, 1H), 5.04 – 4.96 (m, 1H), 4.05 (s, 3H), 3.94 (s, 3H), 2.50 – 2.25 (m, 5H), 2.07 – 1.92 (m, 2H), 1.91 – 1.56 (m, 8H), 1.50 – 1.24 (m, 4H), 1.15 – 0.95 (m, 2H). <sup>13</sup>C NMR (101 MHz, Chloroform-d) δ 199.41, 170.69, 165.81, 165.79, 147.93, 147.61, 140.77, 132.12, 130.65, 130.05, 125.50, 124.05, 123.83, 122.72, 85.35, 53.68, 53.52, 53.26, 50.15, 42.79, 38.61, 36.65, 35.73, 35.39, 33.94, 31.45, 29.71, 27.31, 23.58, 20.56. HRMS (ESI) calcd. for (M+H)<sup>+</sup> C<sub>31</sub>H<sub>34</sub>NO<sub>7</sub>:532.2291,found, 532.2286.

### 3.4 Gram-Scale Experiments

**General procedure for Gram-Scale Experiments:** In an oven-dried undivided three-necked bottle (50 mL) equipped with a stir bar, isatin (3 mmol), dimethyl but-2-ynedioate (4.5 mmol), serine residue (4.5 mmol), <sup>n</sup>Bu<sub>4</sub>NBF<sub>4</sub> (1.5 mmol) and KI (0.9 mmol) were combined and added. Then, CH<sub>3</sub>CN (20 mL) were injected into the tubes via syringes. The bottle was equipped with carbon rod (ϕ 6 mm, about 10 mm immersion depth in solution) as the anode and platinum plate (15 mm×15 mm×0.3 mm) as the cathode. The reaction mixture was stirred and electrolysis at constant current of 5 mA under room temperature overnight. The solvent was removed under vacuum. The crude product was purified by flash column chromatography on silica gel to afford pure product.

### 3.5 Polypeptide scope and characterization :

**The procedure for the bioconjugated product (4ai):** In an oven-dried undivided three-necked bottle (15 mL) equipped with a stir bar, polypeptides (5 mg), isatin (10 mg), but-2-ynedioate(12 μL) , <sup>n</sup>Bu<sub>4</sub>NBF<sub>4</sub> (5 mg), KI (2 mg) and CH<sub>3</sub>CN (0.75 mL) were combined and added. The bottle was equipped carbon paper (10 mm×10 mm×0.1 mm) as the anode and platinum plate (10 mm×10

mm×0.3 mm) as the cathode. The reaction mixture was stirred and electrolysis at constant current of 5 mA under room temperature for 30 min. After completion of the reaction, the solution was analyzed by TOF-LC/MS spectroscopy. The reaction was analyzed by reverse phase HPLC using a gradient of 70% to 60% buffer B over 20 minutes on an Agilent Zorbax SB-Aq 5µm column of 250 mm length. HPLC analysis used buffers A (water) and B (acetonitrile + 0.1% TFA). Conversion reported as a % conversion as determined.

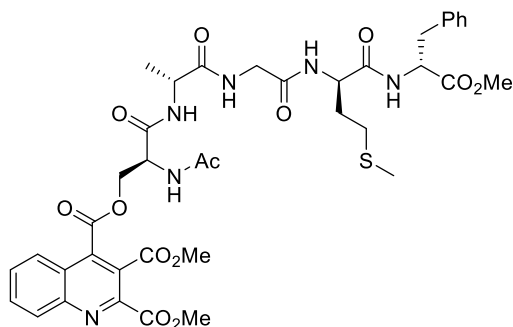

**bioconjugated product 4ai : Ac-S(Quinoline)AGMF-Ome**

**HPLC:** >99% conversion.

After the reaction finished, there are four peaks that elute at 60% buffer B (acetonitrile + 0.1% TFA) with retention times of 7.493 min , 8.280 min, 10.713 min and 11.327 min. Polypeptide **3ai** is a peak that elutes at 60% buffer B (acetonitrile + 0.1% TFA) with a retention time of 7.020 min.

**HRMS (ESI-TOF)** calcd for  $C_{39}H_{47}N_6O_{13}S$ ,  $[M+H]^+$ , 839.2922, found 839.2928. calcd for  $C_{39}H_{46}N_6NaO_{13}S$ ,  $[M+Na]^+$ , 861.2741, found 861.2736.

**HPLC Spectra:**

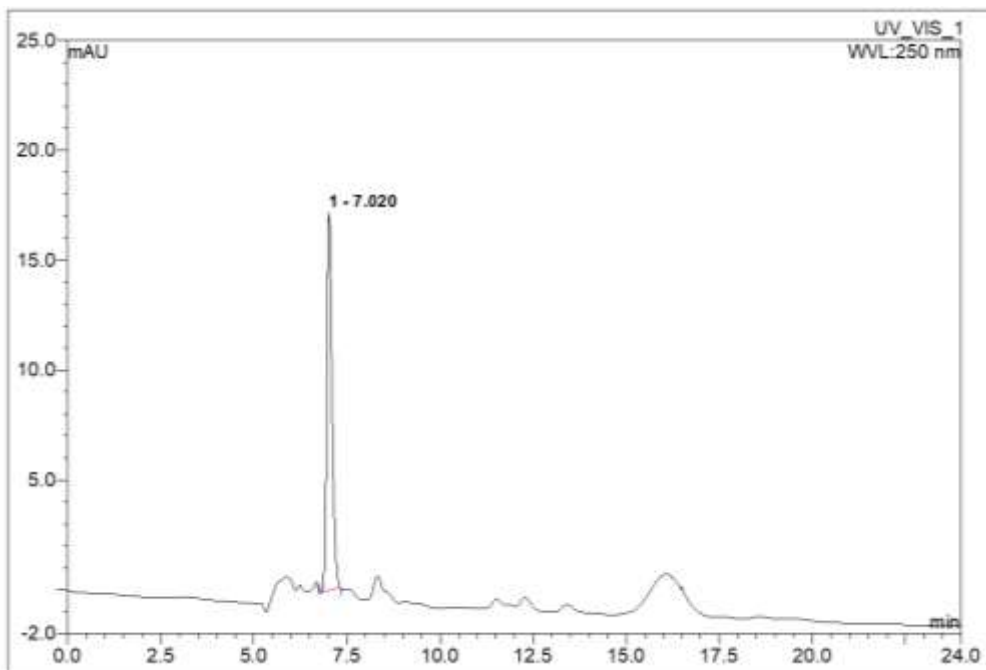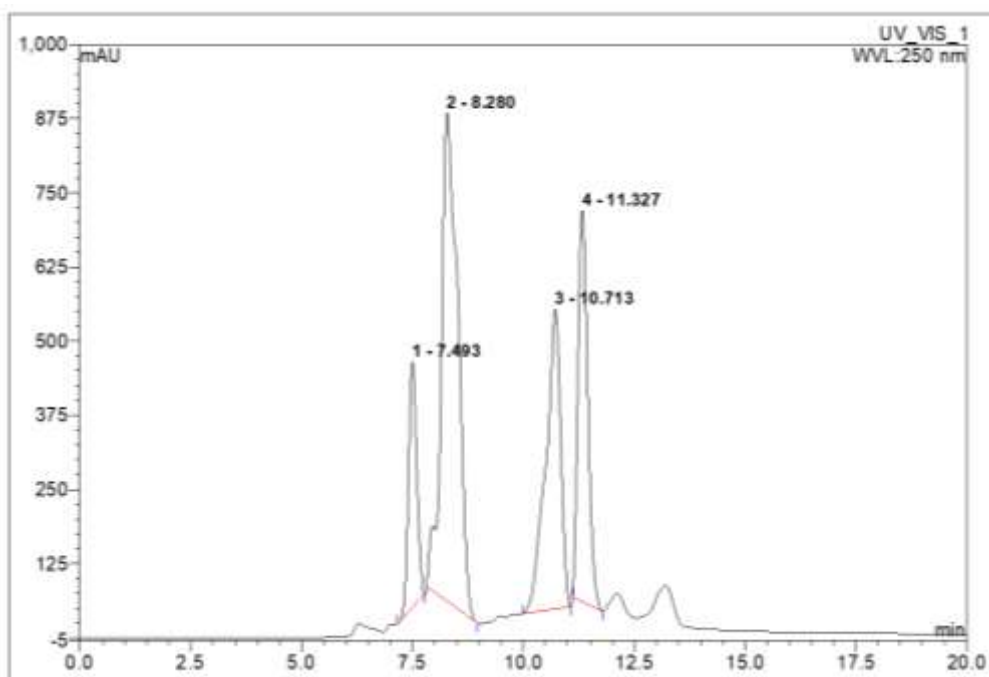

**Normalized UV-VIS Spectra of Reactants and Products:**

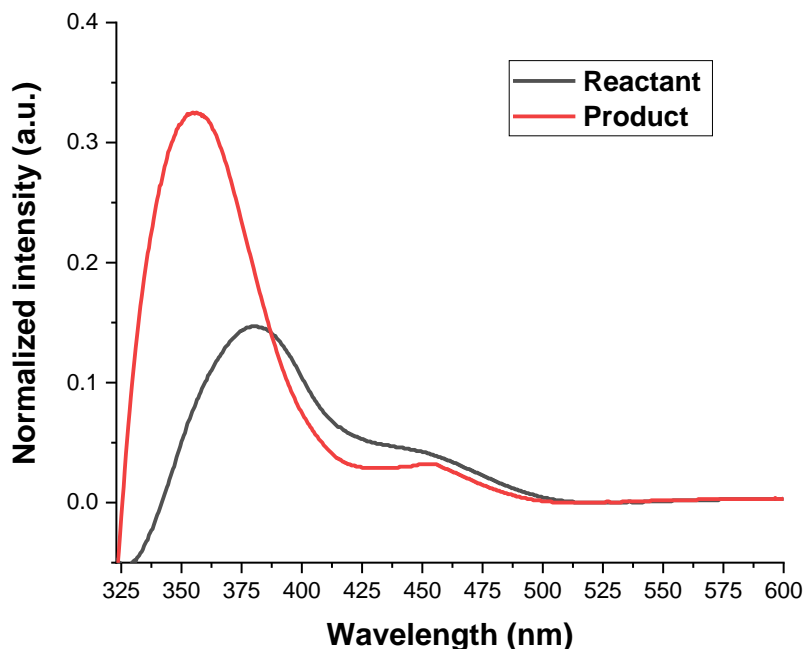

### 3.6 Isatins, alkynes and selected small-molecule alcohols scope and characterization.

**General procedure for quinoline-substituted product:** In an oven-dried undivided three-necked bottle (25 mL) equipped with a stir bar, isatin (0.3 mmol), dimethyl but-2-ynedioate (0.45 mmol), alcohol (0.45 mmol),  $n\text{-Bu}_4\text{NBF}_4$  (0.15 mmol) and KI (0.03 mmol) were combined and added. Then,  $\text{CH}_3\text{CN}$  (6 mL) were injected into the tubes via syringes. The bottle was equipped with carbon rod ( $\phi$  6 mm, about 10 mm immersion depth in solution) as the anode and platinum plate (15 mm $\times$ 15 mm $\times$ 0.3 mm) as the cathode. The reaction mixture was stirred and electrolysis at a constant current of 5 mA under room temperature for 100 min. After completion of the reaction, as indicated by TLC and GC-MS, the pure product was obtained by flash column chromatography on silica gel (eluent: petroleum ether/ethyl acetate).

We tested various other alkynes, including phenylacetylene, methyl 3-phenylpropiolate and methyl propiolate, no reaction occurred under standard conditions and led to full recovery of the starting material. We have also tested the substrates the containing amine group. Unfortunately,

the reaction was messy and no product could be obtained.

Some inert alkynes:

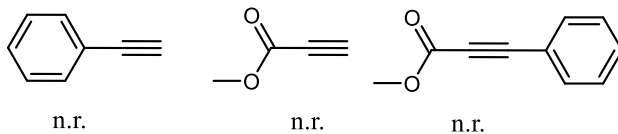

Substrates containing NH group:

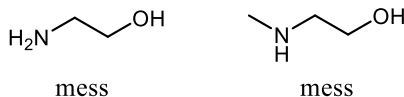

### Detailed descriptions for products:

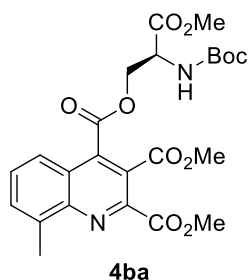

**(S)-4-(2-((*tert*-butoxycarbonyl)amino)-3-methoxy-3-oxopropyl) 2,3-dimethyl 8-methylquinoline-2,3,4-tricarboxylate (4ba):** yellow oil (Yield: 74%, 110.67 mg),  $^1\text{H}$  NMR (400 MHz, Chloroform-*d*)  $\delta$  7.73 (dd,  $J = 17.0, 7.7$  Hz, 2H), 7.62 – 7.56 (m, 1H), 5.55 (d,  $J = 8.4$  Hz, 1H), 4.81 (t,  $J = 3.9$  Hz, 2H), 4.69 (s, 1H), 4.01 (s, 3H), 3.96 (s, 3H), 3.74 (s, 3H), 2.81 (s, 3H), 1.43 (s, 9H).  $^{13}\text{C}$  NMR (101 MHz, Chloroform-*d*)  $\delta$  169.86, 166.36, 165.81, 165.47, 155.29, 147.32, 146.88, 140.46, 138.99, 132.50, 129.81, 123.57, 123.27, 121.05, 80.41, 66.16, 53.43, 53.21, 52.89, 28.28, 17.96. HRMS (ESI) calcd. for  $(\text{M}+\text{H})^+$   $\text{C}_{24}\text{H}_{29}\text{N}_2\text{O}_{10}$ :505.1777, found, 505.1766.

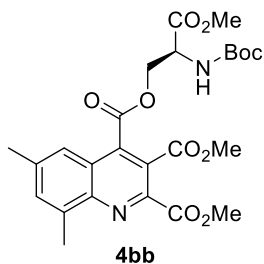

**(S)-4-(2-((tert-butoxycarbonyl)amino)-3-methoxy-3-oxopropyl) 2,3-dimethyl 6,8-dimethylquinoline-2,3,4-tricarboxylate (4bb):** yellow solid (Yield: 65%, 100.67 mg),  $^1\text{H}$  NMR (400 MHz, Chloroform-d)  $\delta$  7.53 (d,  $J = 15.7$  Hz, 2H), 5.56 (d,  $J = 8.4$  Hz, 1H), 4.81 (d,  $J = 3.4$  Hz, 2H), 4.69 (s, 1H), 4.01 (s, 3H), 3.96 (s, 3H), 3.75 (s, 3H), 2.77 (s, 3H), 2.52 (s, 3H), 1.44 (s, 9H).  $^{13}\text{C}$  NMR (101 MHz, Chloroform-d)  $\delta$  169.90, 166.43, 166.07, 165.63, 155.33, 146.21, 145.63, 140.43, 139.46, 138.46, 134.91, 123.72, 122.01, 121.29, 80.41, 66.12, 53.39, 53.16, 52.90, 52.87, 28.29, 22.04, 17.84. HRMS (ESI) cald. for  $(\text{M}+\text{H})^+$   $\text{C}_{25}\text{H}_{31}\text{N}_2\text{O}_{10}$ :519.1973,found, 519.1984.

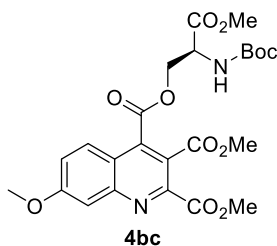

**(S)-4-(2-((tert-butoxycarbonyl)amino)-3-methoxy-3-oxopropyl) 2,3-dimethyl 7-methoxyquinoline-2,3,4-tricarboxylate (4bc):** light yellow solid (Yield: 76%, 118.17 mg),  $^1\text{H}$  NMR (400 MHz, Chloroform-d)  $\delta$  7.83 (d,  $J = 9.3$  Hz, 1H), 7.53 (d,  $J = 2.5$  Hz, 1H), 7.34 (dd,  $J = 9.3, 2.6$  Hz, 1H), 5.55 (d,  $J = 8.3$  Hz, 1H), 4.79 (t,  $J = 3.3$  Hz, 2H), 4.68 (s, 1H), 4.02 (s, 3H), 3.94 (s, 6H), 3.75 (s, 3H), 1.43 (s, 9H).  $^{13}\text{C}$  NMR (101 MHz, Chloroform-d)  $\delta$  169.86, 166.05, 165.89, 165.25, 162.94, 155.28, 150.01, 148.81, 139.84, 126.59, 123.78, 119.70, 118.88, 108.07, 80.43, 66.21, 55.95, 53.45, 53.38, 52.91, 52.86, 28.28. HRMS (ESI) cald. for  $(\text{M}+\text{H})^+$   $\text{C}_{24}\text{H}_{29}\text{N}_2\text{O}_{11}$ :521.1727,found, 521.1731.

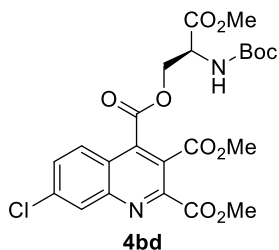

**(S)-4-(2-((*tert*-butoxycarbonyl)amino)-3-methoxy-3-oxopropyl) 2,3-dimethyl 7-chloroquinoline-2,3,4-tricarboxylate (4bd):** yellow solid (Yield: 75%, 117.57 mg),  $^1\text{H}$  NMR (400 MHz, Chloroform-*d*)  $\delta$  8.24 (s, 1H), 7.94 (d, *J* = 9.0 Hz, 1H), 7.67 (d, *J* = 8.1 Hz, 1H), 5.52 (d, *J* = 7.8 Hz, 1H), 4.81 (d, *J* = 3.0 2H), 4.69 (s, 1H), 4.03 (s, 3H), 3.96 (s, 3H), 3.76 (s, 3H), 1.43 (s, 9H).  $^{13}\text{C}$  NMR (101 MHz, Chloroform-*d*)  $\delta$  169.79, 165.53, 165.45, 164.60, 155.23, 149.17, 147.98, 139.79, 138.81, 131.25, 129.39, 126.89, 122.62, 122.13, 80.52, 66.44, 53.59, 52.97, 52.82, 28.27. HRMS (ESI) cald. for (M+H) $^+$  C<sub>23</sub>H<sub>26</sub>ClN<sub>2</sub>O<sub>10</sub>: 525.1198,found, 525.1201.

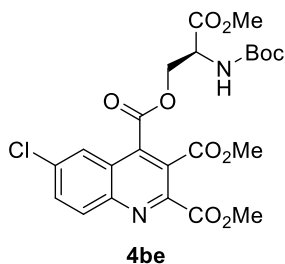

**(S)-4-(2-((*tert*-butoxycarbonyl)amino)-3-methoxy-3-oxopropyl) 2,3-dimethyl 6-chloroquinoline-2,3,4-tricarboxylate (4be):** yellow oil (Yield: 71%, 110.15 mg),  $^1\text{H}$  NMR (400 MHz, Chloroform-*d*)  $\delta$  8.19 (d, *J* = 9.0 Hz, 1H), 8.00 (s, 1H), 7.81 (d, *J* = 11.3 Hz, 1H), 5.56 – 5.48 (m, 1H), 4.81 (d, *J* = 3.2 Hz, 2H), 4.70 (s, 1H), 4.03 (s, 3H), 3.97 (s, 3H), 3.78 (s, 3H), 1.43 (s, 9H).  $^{13}\text{C}$  NMR (101 MHz, Chloroform-*d*)  $\delta$  169.76, 165.71, 165.32, 164.40, 155.24, 147.78, 145.98, 138.36, 136.77, 133.39, 132.05, 124.45, 124.42, 124.04, 80.51, 66.56, 53.63, 53.61, 53.02, 52.79, 28.26. HRMS (ESI) cald. for (M+H) $^+$  C<sub>23</sub>H<sub>26</sub>ClN<sub>2</sub>O<sub>10</sub>:525.1198,found, 525.1194.

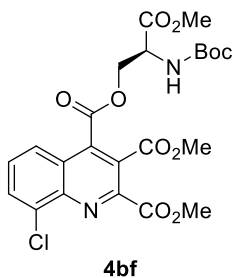

**(S)-4-(2-((*tert*-butoxycarbonyl)amino)-3-methoxy-3-oxopropyl) 2,3-dimethyl 8-chloroquinoline-2,3,4-tricarboxylate (4bf):** light yellow solid (Yield: 67%, 103.74 mg),  $^1\text{H}$  NMR (400 MHz, Chloroform-*d*)  $\delta$  8.00 (d,  $J = 7.5$  Hz, 1H), 7.91 (d,  $J = 9.4$  Hz, 1H), 7.66 (t,  $J = 8.3$ , 1H), 5.50 (d,  $J = 8.2$  Hz, 1H), 4.88 – 4.76 (m, 2H), 4.70 (s, 1H), 4.05 (s, 3H), 3.98 (s, 3H), 3.76 (s, 3H), 1.44 (s, 9H).  $^{13}\text{C}$  NMR (101 MHz, Chloroform-*d*)  $\delta$  169.78, 165.51, 165.46, 164.74, 155.24, 148.63, 144.06, 140.50, 135.17, 132.43, 129.96, 125.11, 124.52, 123.10, 80.53, 66.46, 53.65, 53.55, 52.97, 52.84, 28.29. HRMS (ESI) cald. for (M+H) $^+$  C<sub>23</sub>H<sub>26</sub>ClN<sub>2</sub>O<sub>10</sub>: 525.1198, found, 525.1196.

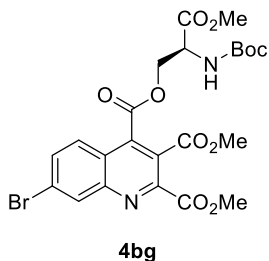

**(S)-4-(2-((*tert*-butoxycarbonyl)amino)-3-methoxy-3-oxopropyl) 2,3-dimethyl 7-bromoquinoline-2,3,4-tricarboxylate (4bg):** yellow solid (Yield: 67%, 118.95 mg),  $^1\text{H}$  NMR (400 MHz, Chloroform-*d*)  $\delta$  8.38 (s, 1H), 7.82 (d,  $J = 9.0$  Hz, 1H), 7.74 (d,  $J = 9.0$  Hz, 1H), 5.55 (d,  $J = 8.2$  Hz, 1H), 4.77 (t,  $J = 3.9$  Hz, 2H), 4.66 (s, 1H), 3.99 (s, 3H), 3.93 (s, 3H), 3.72 (s, 3H), 1.38 (s, 9H).  $^{13}\text{C}$  NMR (101 MHz, Chloroform-*d*)  $\delta$  169.77, 165.50, 165.35, 164.49, 155.22, 149.01, 147.97, 139.80, 133.69, 132.67, 127.10, 126.80, 122.73, 122.33, 80.42, 66.40, 53.58, 53.55, 52.93, 52.79, 28.24. HRMS (ESI) cald. for (M+H) $^+$  C<sub>23</sub>H<sub>26</sub>BrN<sub>2</sub>O<sub>10</sub>: 569.0771, found, 569.0776.



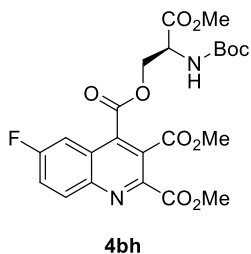

**(S)-4-(2-((*tert*-butoxycarbonyl)amino)-3-methoxy-3-oxopropyl) 2,3-dimethyl 6-fluoroquinoline-2,3,4-tricarboxylate (4bh):** yellow oil (Yield: 72%, 118.95 mg),  $^1\text{H}$  NMR (400 MHz, Chloroform-*d*)  $\delta$  8.25 (dd,  $J = 9.2, 5.3$  Hz, 1H), 7.68 – 7.61 (m, 2H), 5.52 (d,  $J = 8.2$  Hz, 1H), 4.83 – 4.74 (m, 2H), 4.68 (s, 1H), 4.01 (s, 3H), 3.96 (s, 3H), 3.76 (s, 3H), 1.41 (s, 9H).  $^{19}\text{F}$  NMR (376 MHz, Chloroform-*d*)  $\delta$  -105.46.  $^{13}\text{C}$  NMR (101 MHz, Chloroform-*d*)  $\delta$  169.76, 165.88, 165.31, 164.48, 162.65 (d,  $J = 254.6$  Hz), 155.22, 146.83 (d,  $J = 2.8$  Hz), 144.74, 138.40 (d,  $J = 6.2$  Hz), 133.37 (d,  $J = 9.5$  Hz), 124.98 (d,  $J = 10.9$  Hz), 124.26, 122.85 (d,  $J = 26.1$  Hz), 109.40 (d,  $J = 24.5$  Hz), 80.49, 66.44, 53.58, 53.56, 52.95, 52.78, 28.22. HRMS (ESI) calcd. for (M+H) $^+$  C<sub>23</sub>H<sub>25</sub>FN<sub>2</sub>O<sub>10</sub>:508.1493,found, 508.1487.

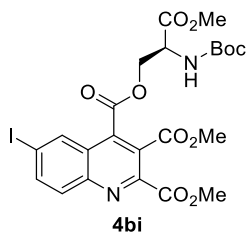

**(S)-4-(2-((*tert*-butoxycarbonyl)amino)-3-methoxy-3-oxopropyl) 2,3-dimethyl 6-iodoquinoline-2,3,4-tricarboxylate (4bi):** light yellow oil (Yield: 75%, 138.56 mg),  $^1\text{H}$  NMR (400 MHz, Chloroform-*d*)  $\delta$  8.39 (d,  $J = 1.7$  Hz, 1H), 8.12 (d,  $J = 10.8$  Hz, 1H), 7.95 (d,  $J = 8.9$  Hz, 1H), 5.53 (d,  $J = 7.3$  Hz, 1H), 4.81 (d,  $J = 3.2$  Hz, 2H), 4.70 (s, 1H), 4.03 (s, 3H), 3.97 (s, 3H), 3.79 (s, 3H), 1.43 (s, 9H).  $^{13}\text{C}$  NMR (101 MHz, Chloroform-*d*)  $\delta$  169.76, 165.64, 165.38, 164.41, 155.26, 148.06, 146.51, 141.28, 138.11, 134.33, 131.78, 125.07, 123.69, 97.34, 80.53, 66.59, 53.64, 53.61, 53.09, 52.79, 28.30. HRMS (ESI) calcd. for (M+H) $^+$  C<sub>23</sub>H<sub>26</sub>IN<sub>2</sub>O<sub>10</sub>:617.0632,found, 617.0635.

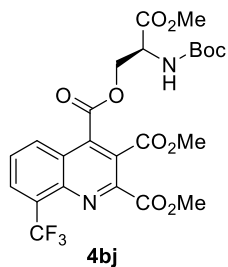

**(S)-4-(2-((tert-butoxycarbonyl)amino)-3-methoxy-3-oxopropyl) 2,3-dimethyl 8-(trifluoromethyl)quinoline-2,3,4-tricarboxylate (4bj):** white solid (Yield: 66%, 110.45 mg),  $^1\text{H}$  NMR (400 MHz, Chloroform-*d*)  $\delta$  8.21 (dd,  $J = 18.8, 7.8$  Hz, 2H), 7.79 (t,  $J = 7.9$  Hz, 1H), 5.51 (d,  $J = 8.2$  Hz, 1H), 4.83 (td,  $J = 11.5, 3.4$  Hz, 2H), 4.70 (s, 1H), 4.03 (s, 3H), 3.98 (s, 3H), 3.76 (s, 3H), 1.43 (s, 9H).  $^{19}\text{F}$  NMR (376 MHz, Chloroform-*d*)  $\delta$  -60.17.  $^{13}\text{C}$  NMR (101 MHz, Chloroform-*d*)  $\delta$  169.77, 165.56, 165.28, 164.60, 155.24, 149.09, 144.19, 140.15, 130.65 (q,  $J = 5.3$  Hz), 129.86, 128.96 (q,  $J = 124.0$  Hz), 128.70, 124.05, 123.17 (q,  $J = 274.0$  Hz), 122.75, 80.53, 66.48, 53.68, 53.48, 52.96, 52.84, 28.27. HRMS (ESI) calcd. for (M+H) $^+$   $\text{C}_{24}\text{H}_{26}\text{F}_3\text{N}_2\text{O}_{10}$ :559.1540,found, 559.1538.

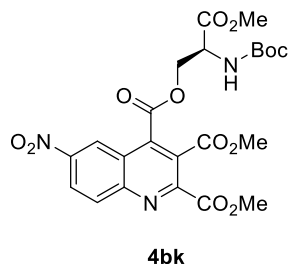

**(S)-4-(2-((tert-butoxycarbonyl)amino)-3-methoxy-3-oxopropyl) 2,3-dimethyl 6-nitroquinoline-2,3,4-tricarboxylate (4bk):** yellow solid (Yield: 71%, 112.57 mg),  $^1\text{H}$  NMR (400 MHz, Chloroform-*d*)  $\delta$  9.00 (d,  $J = 2.3$  Hz, 1H), 8.64 (dd,  $J = 9.3, 2.4$  Hz, 1H), 8.43 (d,  $J = 9.3$  Hz, 1H), 5.54 (d,  $J = 7.8$  Hz, 1H), 4.88 (t,  $J = 2.9$  Hz, 2H), 4.73 (s, 1H), 4.07 (s, 3H), 4.01 (s, 3H), 3.80 (s, 3H), 1.44 (s, 9H).  $^{13}\text{C}$  NMR (101 MHz, Chloroform-*d*)  $\delta$  169.69, 165.08, 164.93, 163.82, 155.23, 151.03, 149.25, 147.77, 141.09, 132.54, 125.60, 124.82, 123.10, 122.49, 80.64, 66.97, 53.85, 53.10, 52.81, 51.76, 28.25. HRMS (ESI) calcd. for (M+H) $^+$   $\text{C}_{23}\text{H}_{26}\text{N}_3\text{O}_{12}$ :536.1516,found, 536.1518.

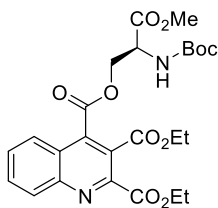

4bl

**(S)-4-(2-((tert-butoxycarbonyl)amino)-3-methoxy-3-oxopropyl) 2,3-diethyl quinoline-2,3,4-tricarboxylate (4bl):** light yellow oil (Yield: 81%, 125.57 mg) ,  $^1\text{H}$  NMR (400 MHz,

Chloroform-d)  $\delta$  8.25 (d,  $J = 8.5$  Hz, 1H), 7.97 – 7.84 (m, 2H), 7.72 (t,  $J = 7.6$  Hz, 1H), 5.55 (d,  $J = 8.1$  Hz, 1H), 4.82 (d,  $J = 3.2$  Hz, 2H), 4.69 (s, 1H), 4.46 (dq,  $J = 28.1, 7.1$  Hz, 4H), 3.75 (s, 3H), 1.43 (t,  $J = 5.5$  Hz, 12H), 1.38 (t,  $J = 7.2$  Hz, 3H).  $^{13}\text{C}$  NMR (101 MHz, Chloroform-d)  $\delta$  193.54, 169.60, 164.79, 164.54, 155.24, 147.51, 147.18, 144.74, 138.02, 134.60, 131.70, 131.55, 130.94, 130.50, 129.51, 129.30, 125.38, 124.23, 80.34, 66.12, 62.77, 52.81, 52.60, 28.32, 21.81, 13.73.

HRMS (ESI) cald. for (M+H) $^+$  C<sub>25</sub>H<sub>31</sub>N<sub>2</sub>O<sub>10</sub>:519.1979,found, 519.1978.

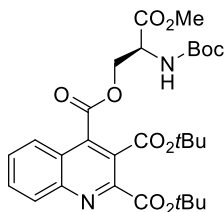

4bm

**(S)-4-(2-((tert-butoxycarbonyl)amino)-3-methoxy-3-oxopropyl) 2,3-di-tert-butyl quinoline-2,3,4-tricarboxylate (4bm):** light yellow solid (Yield: 60%, 103.24 mg),  $^1\text{H}$  NMR (400 MHz,

Chloroform-d)  $\delta$  8.23 (d,  $J = 8.4$  Hz, 1H), 7.87 – 7.77 (m, 2H), 7.67 (t,  $J = 7.6$  Hz, 1H), 5.49 (d,  $J = 8.1$  Hz, 1H), 4.84 (qd,  $J = 11.2, 3.3$  Hz, 2H), 4.72 (s, 1H), 3.74 (s, 3H), 1.66 (s, 9H), 1.58 (s, 9H), 1.44 (s, 9H).  $^{13}\text{C}$  NMR (101 MHz, Chloroform-d)  $\delta$  169.85, 165.69, 165.13, 164.20, 155.20, 150.59, 147.41, 139.73, 131.74, 130.53, 129.37, 125.19, 123.27, 122.83, 84.05, 83.65, 80.48, 65.92, 53.45, 52.96, 28.30, 28.09, 27.95. HRMS (ESI) cald. for (M+H) $^+$  C<sub>29</sub>H<sub>39</sub>N<sub>2</sub>O<sub>10</sub>:575.2605,found, 575.2603.

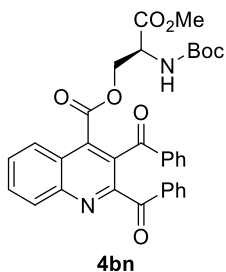

**(S)-2-((tert-butoxycarbonyl)amino)-3-methoxy-3-oxopropyl 2,3-dibenzoylquinoline-4-carboxylate (4bn):** white solid ((Yield: 65%, 113.47 mg),  $^1\text{H}$  NMR (400 MHz, Chloroform-d)  $\delta$  8.26 (d, J = 8.4 Hz, 1H), 8.21 (d, J = 8.2 Hz, 1H), 8.06 (d, J = 7.1 Hz, 2H), 7.93 – 7.89 (m, 1H), 7.80 (t, J = 7.9 Hz, 3H), 7.61 (t, J = 7.4 Hz, 1H), 7.53 (t, J = 7.4 Hz, 1H), 7.46 (t, J = 7.8 Hz, 2H), 7.40 (t, J = 7.7 Hz, 2H), 5.21 (d, J = 8.3 Hz, 1H), 4.58 – 4.43 (m, 2H), 4.22 (d, J = 11.7 Hz, 1H), 3.67 (s, 3H), 1.46 (s, 9H).  $^{13}\text{C}$  NMR (101 MHz, Chloroform-d)  $\delta$  194.55, 192.72, 169.65, 164.71, 155.18, 154.51, 146.71, 137.80, 136.95, 135.25, 133.75, 133.69, 132.25, 131.74, 131.21, 130.75, 130.39, 129.29, 128.70, 128.30, 125.51, 123.56, 80.41, 66.08, 52.86, 52.54, 28.33. HRMS (ESI) cald. for (M+H) $^+$  C<sub>33</sub>H<sub>31</sub>N<sub>2</sub>O<sub>8</sub>:583.2080,found, 583.2084.

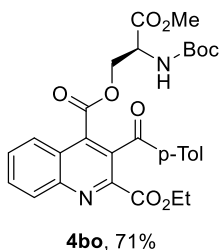

**(S)-4-(2-((tert-butoxycarbonyl)amino)-3-methoxy-3-oxopropyl) 2-ethyl 3-(4-methylbenzoyl)quinoline-2,4-dicarboxylate (4bo):** light yellow oil (Yield: 71%, 120.12 mg),  $^1\text{H}$  NMR (400 MHz, Chloroform-d)  $\delta$  8.36 (d, J = 8.5 Hz, 1H), 8.13 (d, J = 8.4 Hz, 1H), 7.90 (t, J = 7.2 Hz, 1H), 7.77 (t, J = 7.6 Hz, 1H), 7.65 (d, J = 8.1 Hz, 2H), 7.24 (d, J = 8.1 Hz, 2H), 5.26 (d, J = 8.1 Hz, 1H), 4.59 – 4.48 (m, 2H), 4.36 (dd, J = 10.7, 2.5 Hz, 1H), 4.21 (q, J = 7.1 Hz, 2H), 3.66 (s, 3H), 2.40 (s, 3H), 1.45 (s, 9H), 1.16 (t, J = 7.0 Hz, 3H).  $^{13}\text{C}$  NMR (101 MHz, Chloroform-d)  $\delta$  193.54, 169.60, 164.79, 164.54, 155.24, 147.51, 147.18, 144.74, 138.02, 134.60, 131.70, 131.55, 130.94, 130.50, 129.51, 129.30, 125.38, 124.23, 80.34, 66.12, 62.77, 52.81, 52.60, 28.32, 21.81,

13.73. HRMS (ESI) cald. for (M+H)<sup>+</sup> C<sub>30</sub>H<sub>33</sub>N<sub>2</sub>O<sub>9</sub>: 565.2186,found, 565.2184.

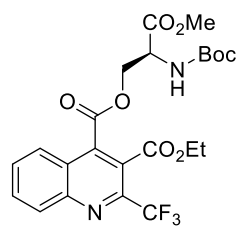

**4bp**, 80%

**(S)-4-(2-((tert-butoxycarbonyl)amino)-3-methoxy-3-oxopropyl) 3-ethyl 2-**

**(trifluoromethyl)quinoline-3,4-dicarboxylate:** light yellow oil (Yield: 80%, 123.12 mg), <sup>1</sup>H NMR (400 MHz, Chloroform-d) δ 8.24 (d, J = 8.5 Hz, 1H), 8.01 (d, J = 8.3 Hz, 1H), 7.90 (t, J = 7.7 Hz, 1H), 7.76 (t, J = 7.7 Hz, 1H), 5.54 (d, J = 8.2 Hz, 1H), 4.81 (d, J = 3.3 Hz, 2H), 4.71 (s, 1H), 4.46 (t, J = 7.1 Hz, 2H), 3.76 (s, 3H), 1.43 (s, 9H), 1.40 (t, J = 7.2 Hz, 3H). <sup>13</sup>C NMR (101 MHz, Chloroform-d) δ 169.76, 165.01, 164.69, 155.23, 146.86, 143.92 (q, J = 35.3 Hz), 140.00, 132.44, 130.67, 130.50, 125.38, 123.84, 122.56, 119.48, 80.44, 67.89, 63.18, 52.92, 52.83, 28.22, 13.75. HRMS (ESI) cald. for (M+H)<sup>+</sup> C<sub>23</sub>H<sub>26</sub>F<sub>3</sub>N<sub>2</sub>O<sub>8</sub>:515.1641,found, 515.1648.

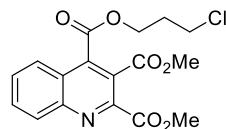

**4ca**

**4-(3-chloropropyl) 2,3-dimethyl quinoline-2,3,4-tricarboxylate (4ca):** light yellow oil (Yield: 70%, 76.62 mg), <sup>1</sup>H NMR (400 MHz, Chloroform-d) δ 8.27 (d, J = 8.5 Hz, 1H), 8.03 (d, J = 8.5 Hz, 1H), 7.89 (ddd, J = 8.4, 6.9, 1.4 Hz, 1H), 7.74 (ddd, J = 8.3, 6.9, 1.2 Hz, 1H), 4.64 (t, J = 6.0 Hz, 2H), 4.04 (s, 3H), 3.96 (s, 3H), 3.66 (t, J = 6.2 Hz, 2H), 2.24 (p, J = 6.1 Hz, 2H). <sup>13</sup>C NMR (101 MHz, Chloroform-d) δ 165.90, 165.75, 165.37, 147.83, 147.60, 140.16, 132.33, 130.61, 130.25, 125.54, 123.74, 122.83, 63.26, 53.59, 53.43, 40.91, 31.18. HRMS (ESI) cald. for (M+H)<sup>+</sup> C<sub>17</sub>H<sub>17</sub>ClNO<sub>6</sub>:366.0744,found, 366.0739.

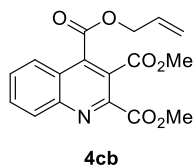

**4-allyl 2,3-dimethyl quinoline-2,3,4-tricarboxylate (4cb):** yellow oil (Yield: 67%, 66.12 mg),  $^1\text{H}$  NMR (400 MHz, Chloroform-d)  $\delta$  8.28 (d,  $J = 8.5$  Hz, 1H), 8.08 (d,  $J = 9.0$  Hz, 1H), 7.88 (ddd,  $J = 8.4, 6.9, 1.4$  Hz, 1H), 7.74 (ddd,  $J = 8.3, 6.9, 1.2$  Hz, 1H), 6.05 (ddt,  $J = 17.2, 10.4, 6.0$  Hz, 1H), 5.46 (dq,  $J = 17.2, 1.4$  Hz, 1H), 5.36 (dq,  $J = 10.4, 1.1$  Hz, 1H), 4.95 (dt,  $J = 6.0, 1.3$  Hz, 2H), 4.05 (s, 3H), 3.94 (s, 3H).  $^{13}\text{C}$  NMR (101 MHz, Chloroform-d)  $\delta$  165.95, 165.68, 165.10, 147.69, 147.63, 139.82, 132.16, 130.93, 130.61, 130.18, 125.61, 123.87, 123.32, 119.98, 67.30, 53.51, 53.25. HRMS (ESI) cald. for  $(\text{M}+\text{H})^+$   $\text{C}_{17}\text{H}_{16}\text{NO}_6$ :330.0978,found, 330.0979.

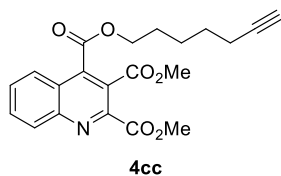

**4-(hept-6-yn-1-yl) 2,3-dimethyl quinoline-2,3,4-tricarboxylate (4cc):** yellow liquid (Yield: 56%, 64.23 mg),  $^1\text{H}$  NMR (400 MHz, Chloroform-d)  $\delta$  8.27 (dd,  $J = 8.3, 3.4$  Hz, 1H), 8.05 (dd,  $J = 8.5, 4.2$  Hz, 1H), 7.88 (td,  $J = 8.4, 7.6, 4.1$  Hz, 1H), 7.73 (td,  $J = 7.0, 3.5$  Hz, 1H), 4.47 (d,  $J = 4.1$  Hz, 2H), 4.04 (s, 3H), 3.95 (s, 3H), 2.23 (t,  $J = 3.9$ , 2H), 1.97 – 1.90 (m, 1H), 1.84 – 1.72 (m, 2H), 1.57 (s, 4H).  $^{13}\text{C}$  NMR (101 MHz, Chloroform-d)  $\delta$  165.90, 165.75, 165.53, 147.80, 147.61, 140.38, 132.18, 130.58, 130.11, 125.64, 123.84, 122.98, 84.03, 68.63, 66.70, 53.52, 53.26, 27.97, 27.95, 25.01, 18.27. HRMS (ESI) cald. for  $(\text{M}+\text{H})^+$   $\text{C}_{21}\text{H}_{22}\text{NO}_6$ :384.1447,found, 384.1445.

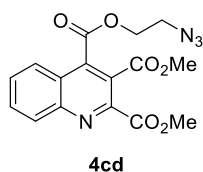

**4-(2-azidoethyl) 2,3-dimethyl quinoline-2,3,4-tricarboxylate (4cd):** yellow solid (Yield: 60 %, 64.23 mg),  $^1\text{H}$  NMR (400 MHz, Chloroform-d)  $\delta$  8.23 (d,  $J = 8.5$  Hz, 1H), 8.00 (d,  $J = 8.4$  Hz,

1H), 7.85 (ddd, J = 8.4, 7.0, 1.2 Hz, 1H), 7.70 (ddd, J = 8.2, 6.9, 1.1 Hz, 1H), 4.57 (t, J = 5.2 Hz, 2H), 4.01 (s, 3H), 3.94 (s, 3H), 3.64 (t, J = 5.1, 2H). <sup>13</sup>C NMR (101 MHz, Chloroform-d) δ 165.78, 165.67, 165.27, 148.06, 147.61, 140.01, 132.38, 130.51, 130.24, 125.49, 123.59, 122.56, 64.67, 53.48, 53.35, 49.44. HRMS (ESI) cald. for (M+H)<sup>+</sup> C<sub>16</sub>H<sub>15</sub>N<sub>4</sub>O<sub>6</sub>:359.0986,found, 359.0987.

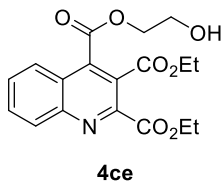

**2,3-diethyl 4-(2-hydroxyethyl) quinoline-2,3,4-tricarboxylate (4ae):** yellow oil (Yield: 60%, 64.05 mg), <sup>1</sup>H NMR (400 MHz, Chloroform-d) δ 8.33 – 8.24 (m, 1H), 8.06 (d, J = 9.1 Hz, 1H), 7.89 (ddd, J = 8.4, 6.9, 1.3 Hz, 1H), 7.74 (ddd, J = 8.3, 7.0, 1.2 Hz, 1H), 4.61 (t, J = 4.5 Hz, 2H), 4.51 (q, J = 7.2 Hz, 2H), 4.43 (q, J = 7.2 Hz, 2H), 3.98 (d, J = 3.6 Hz, 2H), 2.66 (s, 1H), 1.45 (t, J = 7.2 Hz, 3H), 1.39 (t, J = 7.2 Hz, 3H). <sup>13</sup>C NMR (101 MHz, Chloroform-d) δ 165.99, 165.61, 165.46, 148.47, 147.55, 140.48, 132.27, 130.38, 130.05, 125.60, 123.59, 122.31, 68.23, 62.92, 62.73, 60.54, 14.12, 13.88. HRMS (ESI) cald. for (M+H)<sup>+</sup> C<sub>18</sub>H<sub>20</sub>NO<sub>7</sub>:362.1240,found, 362.1236.

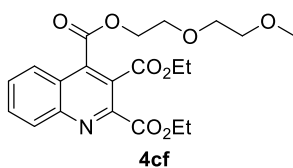

**4-(2-(2-methoxyethoxy)ethyl) 2,3-dimethyl quinoline-2,3,4-tricarboxylate (4cf) :** yellow oil (Yield: 56%, 65.42 mg), <sup>1</sup>H NMR (400 MHz, Chloroform-d) δ 8.25 (d, J = 8.2 Hz, 1H), 8.09 (d, J = 8.5 Hz, 1H), 7.86 (ddd, J = 8.4, 6.9, 1.3 Hz, 1H), 7.71 (ddd, J = 8.3, 6.9, 1.2 Hz, 1H), 4.65 – 4.61 (m, 2H), 4.50 (q, J = 7.1 Hz, 2H), 4.41 (q, J = 7.2 Hz, 2H), 3.86 – 3.82 (m, 2H), 3.68 – 3.65 (m, 2H), 3.56 – 3.52 (m, 2H), 3.35 (s, 3H), 1.43 (t, J = 7.2 Hz, 3H), 1.37 (t, J = 7.1 Hz, 3H). <sup>13</sup>C NMR (101 MHz, Chloroform-d) δ 165.69, 165.58, 165.25, 148.75, 147.64, 140.51, 132.10, 130.43, 129.86, 125.87, 123.75, 122.55, 71.92, 70.57, 68.68, 65.48, 62.65, 62.55, 59.06, 14.12, 13.94.

HRMS (ESI) calcd. for (M+H)<sup>+</sup> C<sub>21</sub>H<sub>26</sub>NO<sub>8</sub>:420.1658,found, 420.1660.

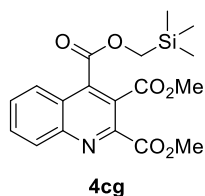

**2,3-dimethyl 4-((trimethylsilyl)methyl) quinoline-2,3,4-tricarboxylate (4cg):** yellow solid (Yield: 55%, 61.74 mg), <sup>1</sup>H NMR (400 MHz, Chloroform-d) δ 8.27 (d, J = 8.5 Hz, 1H), 8.01 (d, J = 7.9 Hz, 1H), 7.87 (ddd, J = 8.4, 7.0, 1.3 Hz, 1H), 7.72 (ddd, J = 8.3, 7.0, 1.1 Hz, 1H), 4.15 (s, 2H), 4.04 (s, 3H), 3.94 (s, 3H), 0.12 (s, 9H). <sup>13</sup>C NMR (101 MHz, Chloroform-d) δ 166.50, 165.95, 165.85, 147.89, 147.65, 140.82, 132.15, 130.62, 130.06, 125.72, 123.99, 123.12, 60.36, 53.54, 53.35, -3.02. HRMS (ESI) calcd. for (M+H)<sup>+</sup> C<sub>18</sub>H<sub>22</sub>NO<sub>6</sub>Si : 376.1216,found, 376.1213.

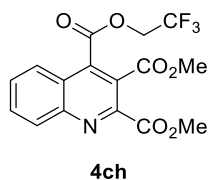

**2,3-dimethyl 4-(2,2,2-trifluoroethyl) quinoline-2,3,4-tricarboxylate (4ch):** yellow solid (Yield: 60%, 66.89 mg), <sup>1</sup>H NMR (400 MHz, Chloroform-d) δ 8.28 (d, J = 8.5 Hz, 1H), 7.98 (d, J = 9.0 Hz, 1H), 7.90 (ddd, J = 8.4, 7.0, 1.3 Hz, 1H), 7.75 (ddd, J = 8.3, 7.0, 1.1 Hz, 1H), 4.81 (q, J = 8.3 Hz, 2H), 4.04 (s, 3H), 3.94 (s, 3H). <sup>19</sup>F NMR (376 MHz, Chloroform-d) δ -73.20. <sup>13</sup>C NMR (101 MHz, Chloroform-d) δ 165.66, 165.51, 164.00, 148.04, 147.67, 138.50, 132.52, 130.68, 130.52, 125.14, 123.48, 122.91, 122.62 (q, J = 277.1 Hz), 61.92 (q, J = 37.3 Hz), 53.54, 53.44. HRMS (ESI) calcd. for (M+H)<sup>+</sup> C<sub>16</sub>H<sub>13</sub>F<sub>3</sub>NO<sub>6</sub>:372.0689,found, 372.0690.

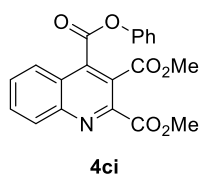

**2,3-dimethyl 4-phenyl quinoline-2,3,4-tricarboxylate (4ci):** yellow liquid (Yield: 42%, 46.01mg), <sup>1</sup>H NMR (400 MHz, Chloroform-d) δ 8.33 (d, J = 8.5 Hz, 1H), 8.21 (d, J = 8.5 Hz, 1H),



7.94 (ddd, J = 8.4, 6.9, 1.4 Hz, 1H), 7.80 (ddd, J = 8.3, 6.9, 1.2 Hz, 1H), 7.49 (dd, J = 8.7, 7.1 Hz, 2H), 7.38 – 7.31 (m, 3H), 4.08 (s, 3H), 3.98 (s, 3H). <sup>13</sup>C NMR (101 MHz, Chloroform-d) δ 165.81, 165.75, 150.38, 147.99, 147.74, 132.40, 130.73, 130.42, 129.83, 126.75, 125.47, 123.82, 123.02, 121.21, 53.56, 53.50. HRMS (ESI) cald. for (M+H)<sup>+</sup> C<sub>20</sub>H<sub>16</sub>NO<sub>6</sub>:366.0978,found, 366.0980.

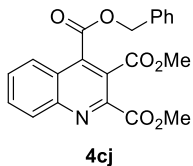

**4-benzyl 2,3-dimethyl quinoline-2,3,4-tricarboxylate (4cj):** yellow oil (Yield : 67%, 74.73mg), <sup>1</sup>H NMR (400 MHz, Chloroform-d) δ 8.26 (d, J = 8.5 Hz, 1H), 8.04 – 8.00 (m, 1H), 7.87 (ddd, J = 8.4, 6.9, 1.3 Hz, 1H), 7.70 (ddd, J = 8.3, 6.9, 1.2 Hz, 1H), 7.46 (dd, J = 7.9, 1.6 Hz, 2H), 7.42 – 7.35 (m, 3H), 5.49 (s, 2H), 4.03 (s, 3H), 3.70 (s, 3H). <sup>13</sup>C NMR (101 MHz, Chloroform-d) δ 165.84, 165.71, 165.26, 147.74, 147.60, 139.83, 134.48, 132.21, 130.58, 130.19, 128.93, 128.90, 128.78, 125.60, 123.86, 123.17, 68.51, 53.56, 53.08. HRMS (ESI) cald. for (M+H)<sup>+</sup> C<sub>21</sub>H<sub>18</sub>NO<sub>6</sub>: 380.1134,found, 380.1132.

### 3.7 PTL derivatives.

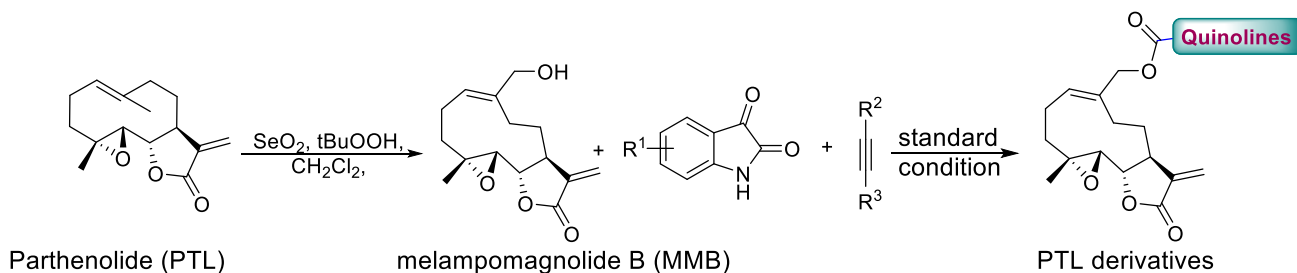

**Synthesis of PTL derivatives:** In a round bottomed flask, equipped with a stir bar, Parthenolide (PTL) (2.0 mmol), SeO<sub>2</sub> (0.4 mmol), t-BuOOH (70% in water, 3 mmol) dissolved in DCM (20 mL). The mixture was stirred for 36 h at room temperature. The resulting crude product was

purified by flash chromatography (dichloromethane : ethyl ether, containing 0.5% of  $\text{NEt}_3$ ) to afford MMB as a white solid<sup>[4]</sup>. Then, in an oven-dried undivided three-necked bottle (25 mL) equipped with a stir bar, isatins (0.3 mmol), MMB (0.45 mmol), alkyne (0.45 mmol),  ${}^n\text{Bu}_4\text{NBF}_4$  (0.15 mmol) and KI (0.03 mmol) were combined and added. Then,  $\text{CH}_3\text{CN}$  (6 mL) were injected into the tubes via syringes. The bottle was equipped with carbon rod ( $\phi$  6 mm, about 10 mm immersion depth in solution) as the anode and platinum plate (15 mm $\times$ 15 mm $\times$ 0.3 mm) as the cathode. The reaction mixture was stirred and electrolysis at a constant current of 5 mA under room temperature for 100 min. After completion of the reaction, as indicated by TLC and LC-MS, the pure product was obtained by flash column chromatography on silica gel (eluent: dichloromethane : ethyl ether).

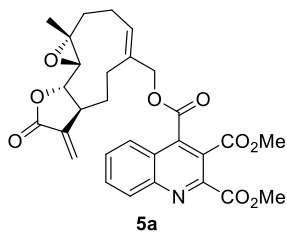

**PTL derivative (PTL-OMe) 5a** : light yellow oil (Yield: 50%, 73.83 mg),  ${}^1\text{H}$  NMR (400 MHz, Chloroform- $d$ )  $\delta$  8.29 (d,  $J$  = 8.1 Hz, 1H), 8.00 (d,  $J$  = 8.5 Hz, 1H), 7.90 (ddd,  $J$  = 8.4, 6.9, 1.4 Hz, 1H), 7.75 (ddd,  $J$  = 8.3, 6.9, 1.2 Hz, 1H), 6.13 (d,  $J$  = 3.5 Hz, 1H), 5.85 (t,  $J$  = 8.2 Hz, 1H), 5.49 (d,  $J$  = 3.2 Hz, 1H), 5.06 (d,  $J$  = 12.1 Hz, 1H), 4.84 (d,  $J$  = 12.2 Hz, 1H), 4.05 (s, 3H), 3.92 (s, 3H), 3.84 (t,  $J$  = 9.3 Hz, 1H), 2.89 – 2.78 (m, 2H), 2.53 – 2.41 (m, 2H), 2.40 – 2.29 (m, 2H), 2.27 – 2.14 (m, 2H), 1.73 – 1.61 (m, 1H), 1.54 (s, 3H).  ${}^{13}\text{C}$  NMR (101 MHz, Chloroform- $d$ )  $\delta$  169.24, 166.01, 165.68, 165.37, 147.71, 147.61, 140.15, 138.43, 134.24, 132.47, 132.41, 130.73, 130.33, 125.34, 123.68, 122.93, 120.39, 80.93, 69.26, 63.36, 59.94, 53.60, 53.32, 42.71, 36.54, 25.50, 24.24, 23.93, 17.99. HRMS (ESI) cald. for  $(\text{M}+\text{H})^+$   $\text{C}_{29}\text{H}_{30}\text{NO}_9$ :536.1921,found, 536.1923.

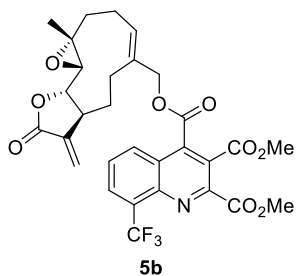

**PTL derivative (PTL-CF<sub>3</sub>) 5b** : light yellow oil (Yield: 42%, 75.98 mg), <sup>1</sup>H NMR (400 MHz, Chloroform-d) δ 8.21 (dd, J = 15.9, 7.9 Hz, 2H), 7.80 (t, J = 7.9 Hz, 1H), 6.14 (d, J = 3.5 Hz, 1H), 5.84 (t, J = 8.2 Hz, 1H), 5.52 (d, J = 3.1 Hz, 1H), 5.05 (d, J = 12.1 Hz, 1H), 4.85 (d, J = 12.2 Hz, 1H), 4.03 (s, 3H), 3.92 (s, 3H), 3.84 (t, J = 9.3 Hz, 1H), 2.88 – 2.77 (m, 2H), 2.56 – 2.42 (m, 2H), 2.41 – 2.29 (m, 2H), 2.19 (ddd, J = 29.8, 9.7, 6.1 Hz, 2H), 1.72 – 1.63 (m, 1H), 1.53 (s, 3H). <sup>19</sup>F NMR (376 MHz, Chloroform-d) δ -60.12. <sup>13</sup>C NMR (101 MHz, Chloroform-d) δ 169.23, 165.48, 165.38, 164.91, 148.85, 144.13, 140.47, 138.51, 134.10, 132.61, 130.66 (q, J = 5.3 Hz), 129.68, 129.15 (q, J = 30.8 Hz), 128.81, 124.08, 123.19 (q, J = 274.0 Hz), 123.16, 120.35, 80.94, 69.37, 63.32, 59.93, 53.51, 53.44, 42.69, 36.51, 25.37, 24.09, 23.92, 17.94. HRMS (ESI) calcd. for (M+H)<sup>+</sup> C<sub>30</sub>H<sub>29</sub>F<sub>3</sub>NO<sub>9</sub>:604.1794, found, 604.1793.

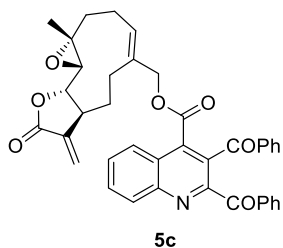

**PTL derivative (PTL-OPh) 5c** : light yellow oil (Yield: 40%, 73.36 mg), <sup>1</sup>H NMR (400 MHz, Chloroform-d) δ 8.26 (d, J = 8.9 Hz, 2H), 8.03 (d, J = 7.3 Hz, 2H), 7.91 (t, J = 8.0 Hz, 1H), 7.79 (dd, J = 22.1, 7.7 Hz, 3H), 7.60 (t, J = 7.4 Hz, 1H), 7.48 (dt, J = 22.0, 7.6 Hz, 3H), 7.36 (d, J = 7.7 Hz, 2H), 6.07 (d, J = 3.4 Hz, 1H), 5.55 (t, J = 7.8 Hz, 1H), 5.38 (d, J = 3.1 Hz, 1H), 4.56 (d, J = 12.3 Hz, 1H), 4.47 (d, J = 12.3 Hz, 1H), 3.74 (t, J = 9.3 Hz, 1H), 2.71 – 2.54 (m, 2H), 2.26 (td, J = 13.5, 4.4 Hz, 1H), 2.20 – 2.00 (m, 5H), 1.46 (s, 3H), 1.44 – 1.32 (m, 1H). <sup>13</sup>C NMR (101 MHz, Chloroform-d) δ 194.31, 192.75, 169.26, 164.99, 154.36, 146.74, 138.45, 138.14, 137.17, 135.27,

133.76, 133.63, 133.59, 132.29, 132.25, 131.79, 131.14, 130.85, 130.47, 129.10, 128.74, 128.33, 125.37, 123.68, 120.22, 80.86, 68.97, 63.24, 59.86, 42.51, 36.47, 25.44, 24.18, 23.83, 17.92. HRMS (ESI) calcd. for (M+H)<sup>+</sup> C<sub>39</sub>H<sub>40</sub>NO<sub>9</sub>:628.2335,found, 628.2330.

**In vitro antitumor activity of PTL derivatives in human cancer cell lines:** The in vitro antiproliferative activity of was evaluated in three human cancer cell lines using the CCK-8 (Cell Counting Kit-8) assay, including U87MG (glioblastoma), MGC803 (gastric carcinoma), HCT116 (colorectal carcinoma). Parthenolide (PTL) was used as the experiment control.

| IC <sub>50</sub> (μM) | PTL            | 5a (PTL-Ome)  | 5b (PTL-OPh)   | 5c (PTL-CF <sub>3</sub> ) |
|-----------------------|----------------|---------------|----------------|---------------------------|
| MGC803                | > 50           | 5.985 ± 0.744 | 5.105 ± 0.578  | 7.498 ± 0.661             |
| HCT116                | 11.050 ± 0.857 | 2.288 ± 1.022 | 2.420 ± 0.814  | 5.118 ± 1.026             |
| U87MG                 | 23.760 ± 0.783 | 8.323 ± 0.761 | 21.620 ± 0.872 | 6.295 ± 0.946             |

It could be seen in the graph that all synthesized compounds showed moderate to significant potency toward three cancer cell lines.

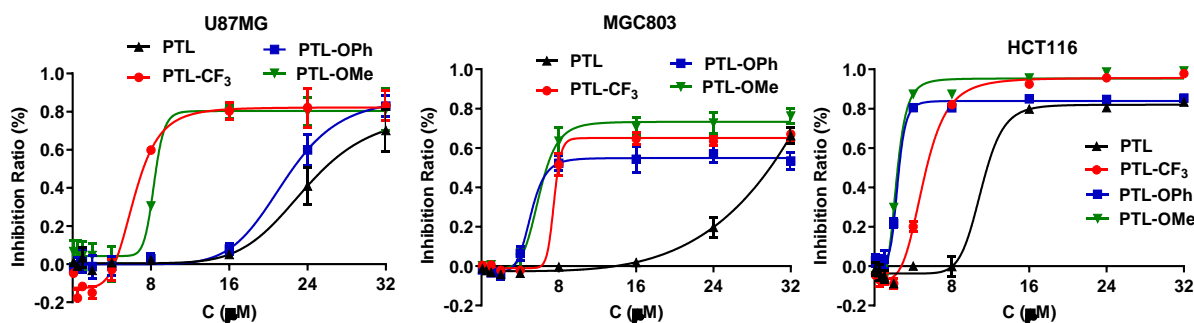

### 3.8 Chemoselective transformations of quinoline-substituted bioactive molecule.

#### Synthesis of Product 7:

In an oven-dried undivided three-necked bottle (25 mL) equipped with a stir bar, compounds **6** (0.3 mmol), dimethyl but-2-ynedioate (0.45 mmol), peptides (0.45 mmol), <sup>n</sup>Bu<sub>4</sub>NBF<sub>4</sub> (0.15 mmol) and KI (0.03 mmol) were combined and added. Then, CH<sub>3</sub>CN (6 mL) were injected into the tubes

via syringes. The bottle was equipped with carbon rod ( $\phi$  6 mm, about 10 mm immersion depth in solution) as the anode and platinum plate (15 mm $\times$ 15 mm $\times$ 0.3 mm) as the cathode. The reaction mixture was stirred and electrolysis at a constant current of 5 mA under room temperature for 100 min. After completion of the reaction, as indicated by TLC and LC-MS, the pure product was obtained by flash column chromatography on silica gel (eluent: CH<sub>2</sub>Cl<sub>2</sub>/MeOH).

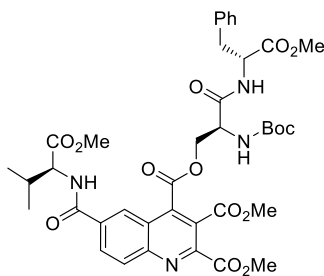

7

**4-((S)-2-((tert-butoxycarbonyl)amino)-3-(((R)-1-methoxy-1-oxo-3-phenylpropan-2-yl)amino)-3-oxopropyl) 2,3-dimethyl 6-(((S)-1-methoxy-3-methyl-1-oxobutan-2-yl)carbamoyl)quinoline-2,3,4-tricarboxylate (7):** light yellow oil (Yield: 48%, 114.13 mg), <sup>1</sup>H NMR (400 MHz, Methanol-d<sub>4</sub>)  $\delta$  8.57 (s, 1H), 8.36 (dd, J = 8.8, 1.9 Hz, 1H), 8.28 (d, J = 8.8 Hz, 1H), 7.15 – 7.07 (m, 5H), 4.76 (ddd, J = 17.5, 9.3, 5.0 Hz, 2H), 4.63 – 4.50 (m, 3H), 4.02 (s, 3H), 3.96 (s, 3H), 3.75 (s, 3H), 3.51 (s, 3H), 3.08 (dd, J = 13.9, 5.5 Hz, 1H), 2.95 (dd, J = 13.9, 8.2 Hz, 1H), 2.29 (dq, J = 14.1, 7.0 Hz, 1H), 1.32 (s, 9H), 1.06 (dd, J = 10.2, 6.8 Hz, 6H). <sup>13</sup>C NMR (101 MHz, Methanol-d<sub>4</sub>)  $\delta$  172.20, 171.44, 169.56, 167.55, 165.56, 165.34, 164.51, 156.08, 149.78, 148.50, 141.20, 136.37, 130.98, 129.92, 128.79, 128.03, 126.44, 122.75, 122.71, 79.78, 65.85, 59.30, 53.56, 52.86, 52.58, 51.28, 51.22, 36.80, 31.68, 30.28, 29.38, 29.35, 29.08, 22.34, 18.33, 18.03, 13.05. HRMS (ESI) calcd. for (M+H)<sup>+</sup> C<sub>39</sub>H<sub>47</sub>N<sub>4</sub>O<sub>14</sub>:795.3089, found, 795.3093.

### Synthesis of Product 10:

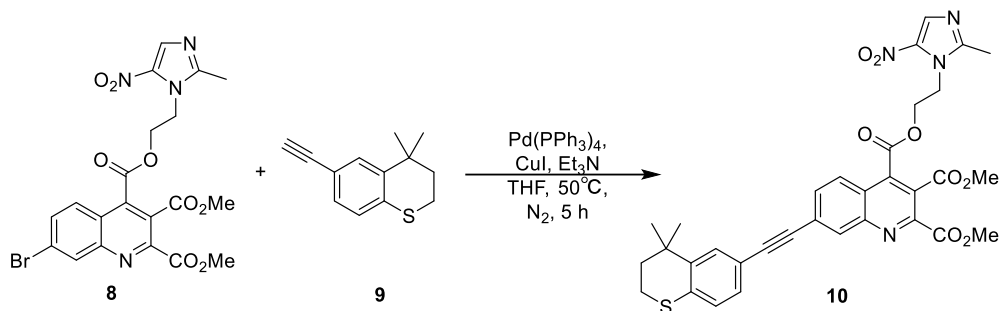

In a round bottomed three-necked flask, equipped with a stir bar, compounds **8** (1 equiv. , 260 mg), 6-Ethynyl-4,4-dimethylthiochroman **9** (2.5equiv. 254 mg), CuI (10 mol%, 10 mg), and Pd(PPh<sub>3</sub>)<sub>4</sub> (10mol%, 115 mg) were dissolved in anhydrous THF (5 mL) under N<sub>2</sub> atmosphere. Then, Et<sub>3</sub>N (5 mL) were injected into the solution via syringes. The reaction mixture was stirred at 50 °C for 5 h. When the reaction was finished, the solvent was removed by reduced pressure and the crude product **10** (Yield: 82%, 255 mg) was purified by flash column chromatography on silica gel (eluent: petroleum ether/ethyl acetate=1:1).

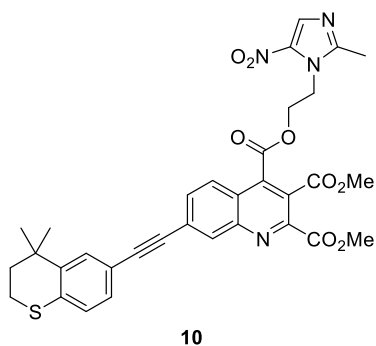

**2,3-dimethyl 4-(2-(2-methyl-5-nitro-1H-imidazol-1-yl)ethyl) 7-((4,4-dimethylthiochroman-6-yl)ethynyl)quinoline-2,3,4-tricarboxylate (10):** yellow oil (Yield: 82%, 255 mg), <sup>1</sup>H NMR (400 MHz, Chloroform-d) δ 8.32 (d, J = 1.2 Hz, 1H), 7.96 (s, 1H), 7.73 (dd, J = 8.7, 1.6 Hz, 1H), 7.61 (d, J = 8.8 Hz, 1H), 7.55 (d, J = 1.7 Hz, 1H), 7.20 (dd, J = 8.1, 1.8 Hz, 1H), 7.05 (d, J = 8.2 Hz, 1H), 4.79 (t, J = 5.3 Hz, 2H), 4.68 (t, J = 5.3 Hz, 2H), 4.01 (s, 3H), 3.86 (s, 3H), 3.06 – 2.98 (m, 2H), 2.32 (s, 3H), 1.96 – 1.89 (m, 2H), 1.33 (s, 6H). <sup>13</sup>C NMR (101 MHz, Chloroform-d) δ 165.60, 165.48, 164.86, 151.23, 148.85, 147.55, 142.25, 139.32, 138.38, 134.62, 133.25, 132.88, 132.73, 129.97, 129.19, 128.34, 126.66, 125.07, 122.60, 122.28, 117.35, 95.35, 95.22, 87.42,

64.79, 53.52, 53.44, 44.73, 37.05, 32.98, 29.93, 23.24, 14.31. HRMS (ESI) calcd. for (M+H)<sup>+</sup>C<sub>33</sub>H<sub>31</sub>N<sub>4</sub>O<sub>8</sub>S:643.1863,found, 643.1860.

## 4. References

- [1] R. A. Serwa, J.-M. Swiecicki, D. Homann, C. P. R. Hackenberger, Phosphoramidate-peptide synthesis by solution- and solid-phase Staudinger-phosphite reactions. *J. Pept. Sci.* **2010**, *16*, 563–567.
- [2] Alam J, Keller T H, Loh T P. Functionalization of peptides and proteins by Mukaiyama aldol reaction. *J. Am. Chem. Soc.* **2010**, *132*, 9546-9548.
- [3] Gu, K., Liu, Y., Guo, Z., Lian, C., Yan, C., Shi, P., ... & Zhu, W. H. In situ ratiometric quantitative tracing of intracellular leucine aminopeptidase activity via an activatable near-infrared fluorescent probe. *ACS Appl. Mater. Inter.* **2016**, *8*, 26622-26629.
- [4] Bravo, F., McDonald, F. E., Neiwert, W. A., & Hardcastle, K. I. Alkene Substituents for Selective Activation of *Endo*-Regioselective Polyepoxide Oxacyclizations. *Org. Lett.* **2004**, *6*, 4487-4489.

## 5. Spectra

### 5.1. NMR Spectra of Products

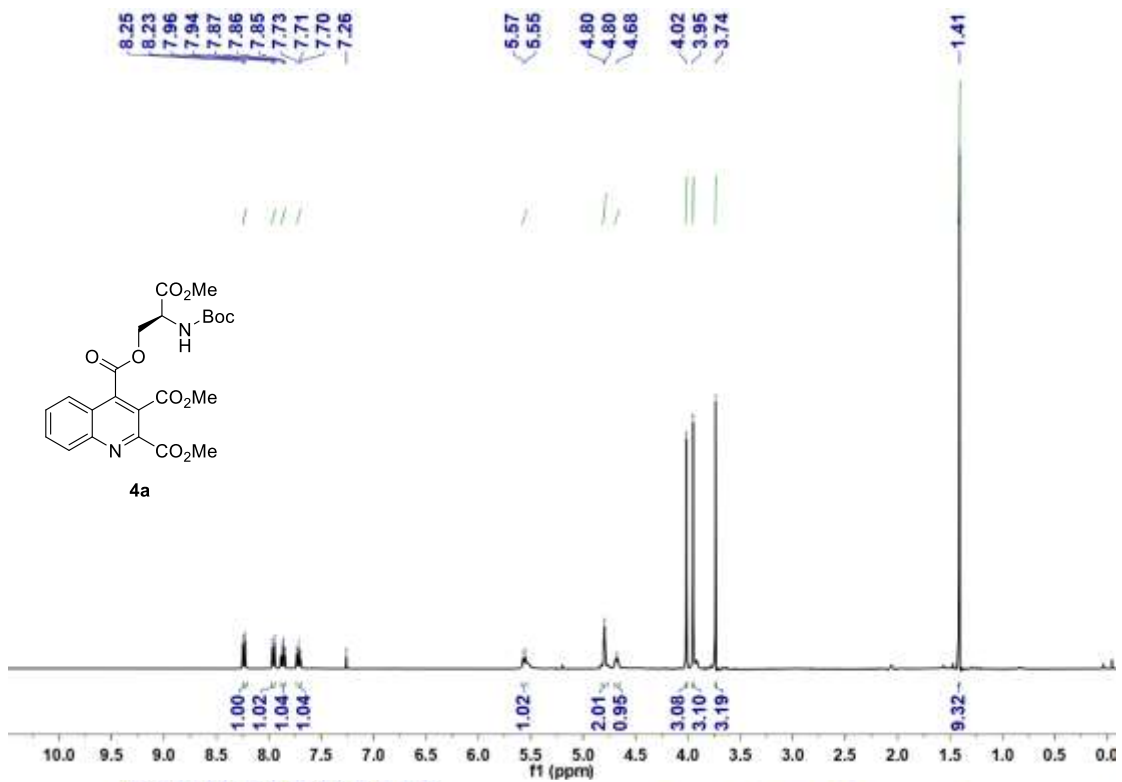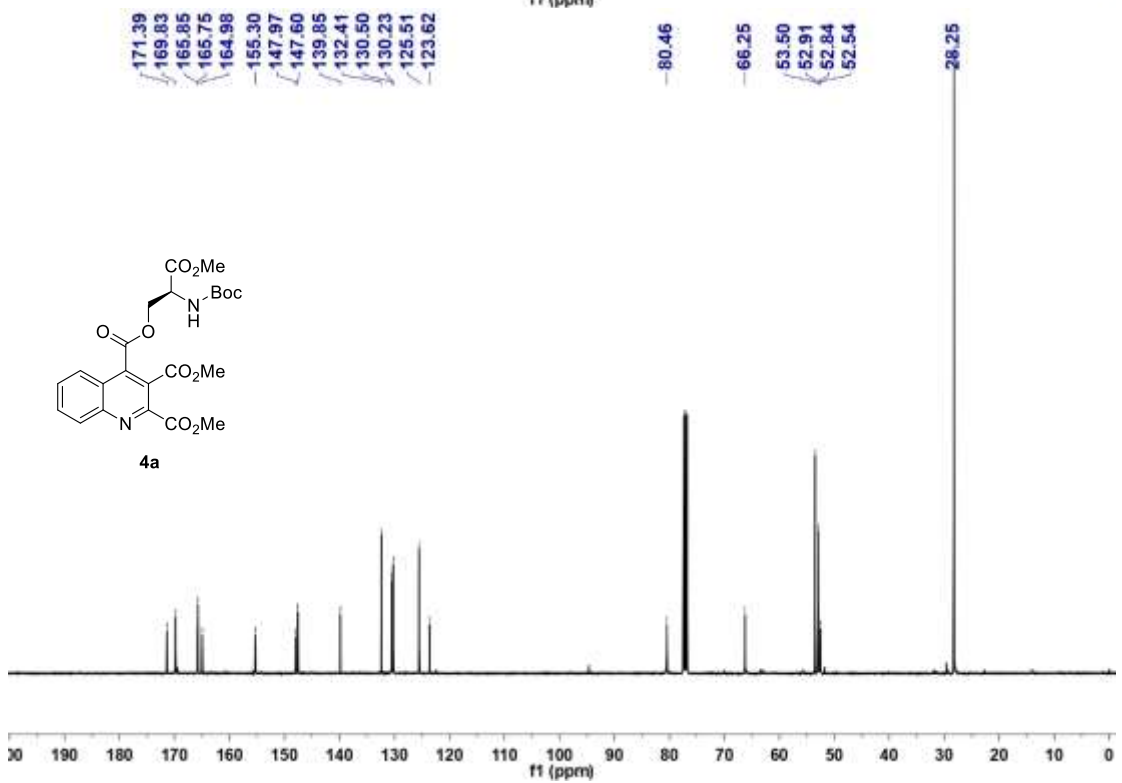



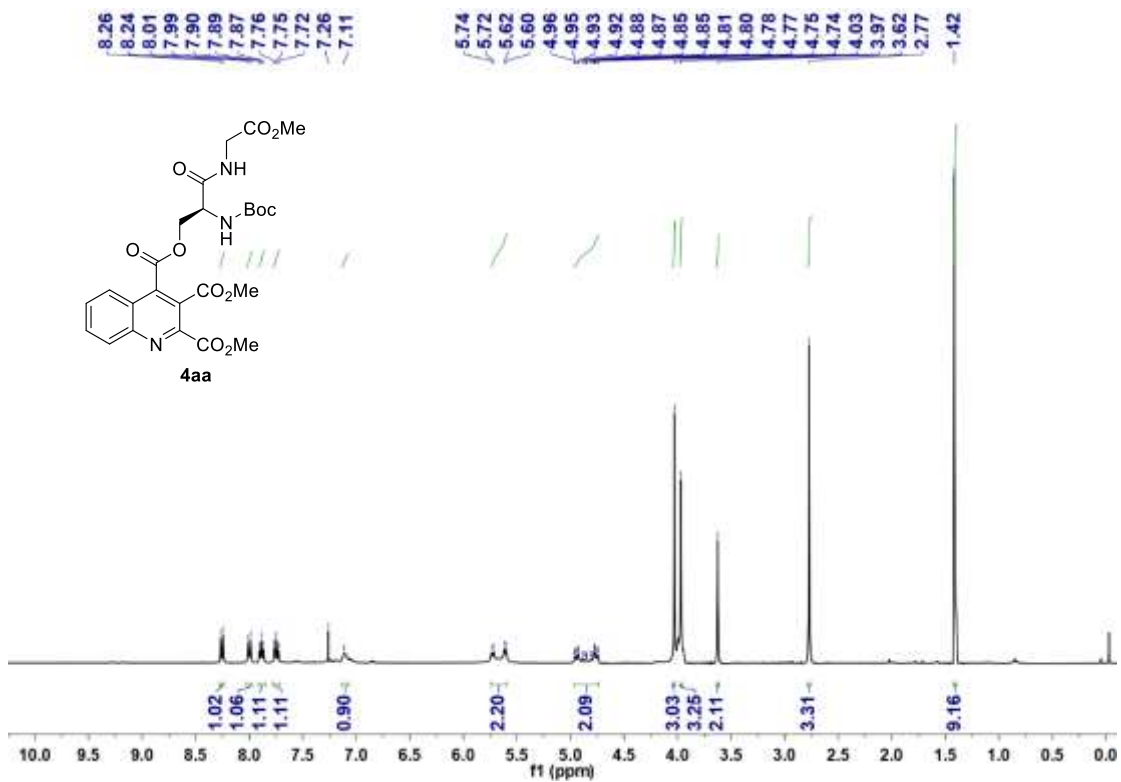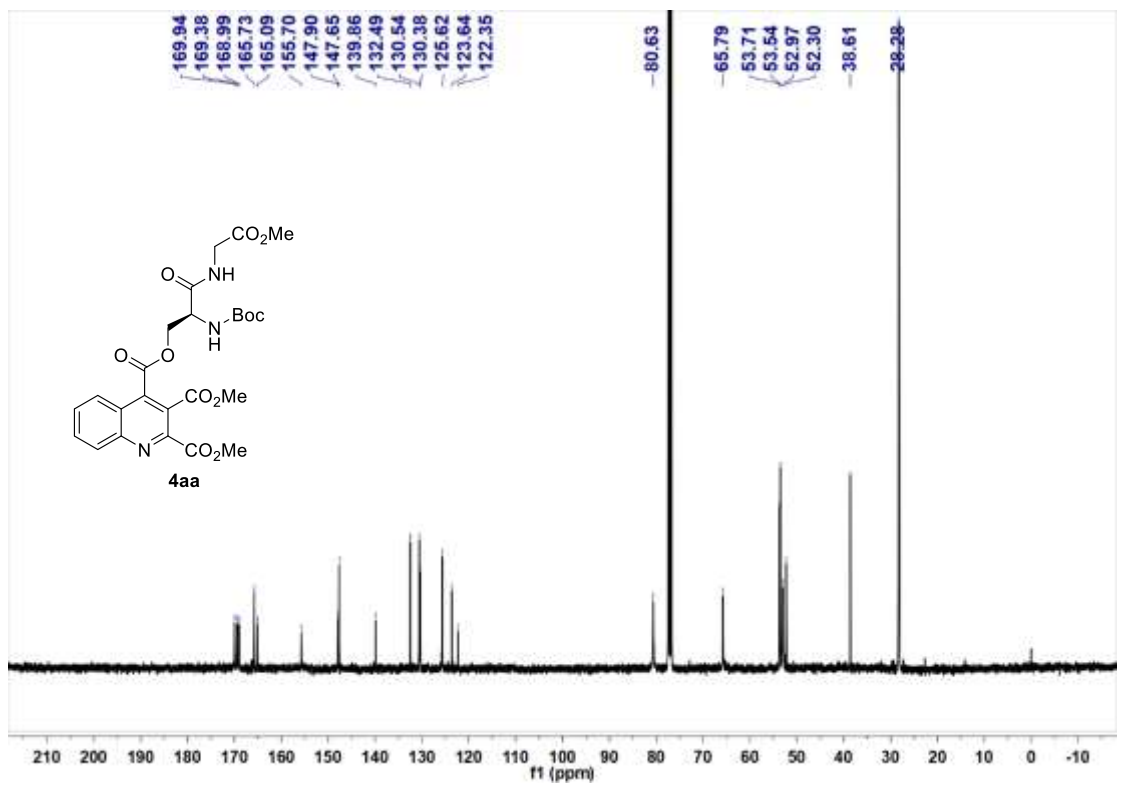

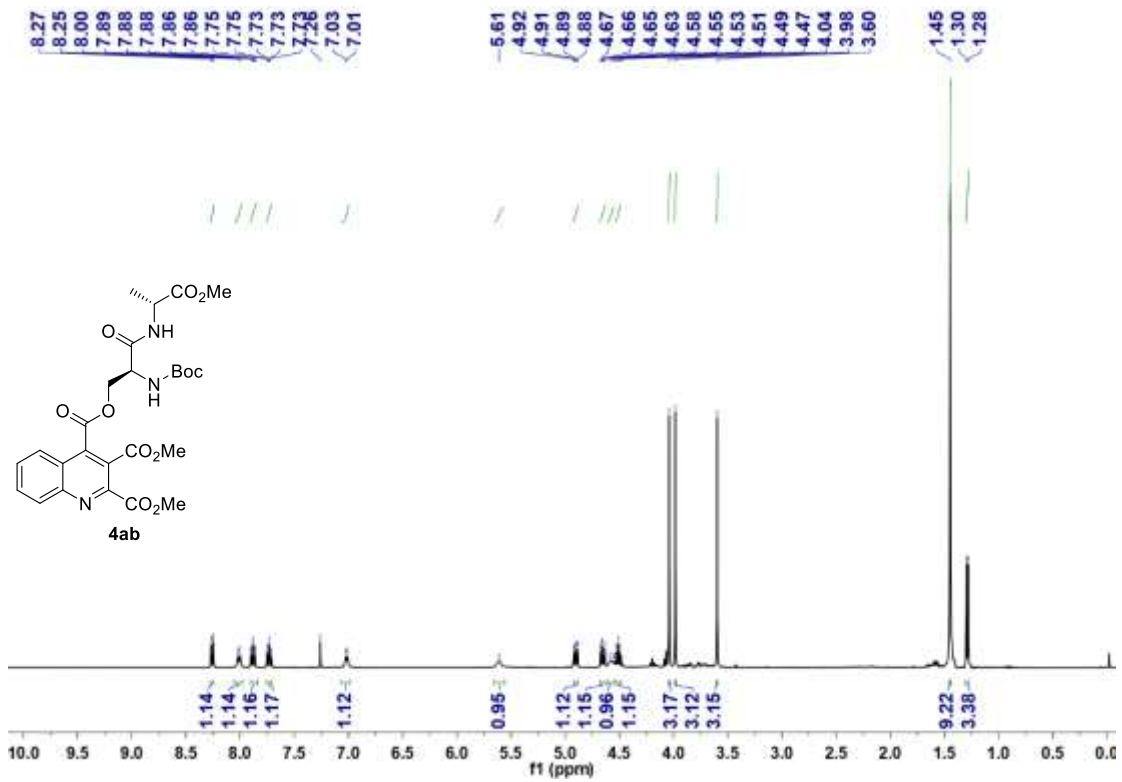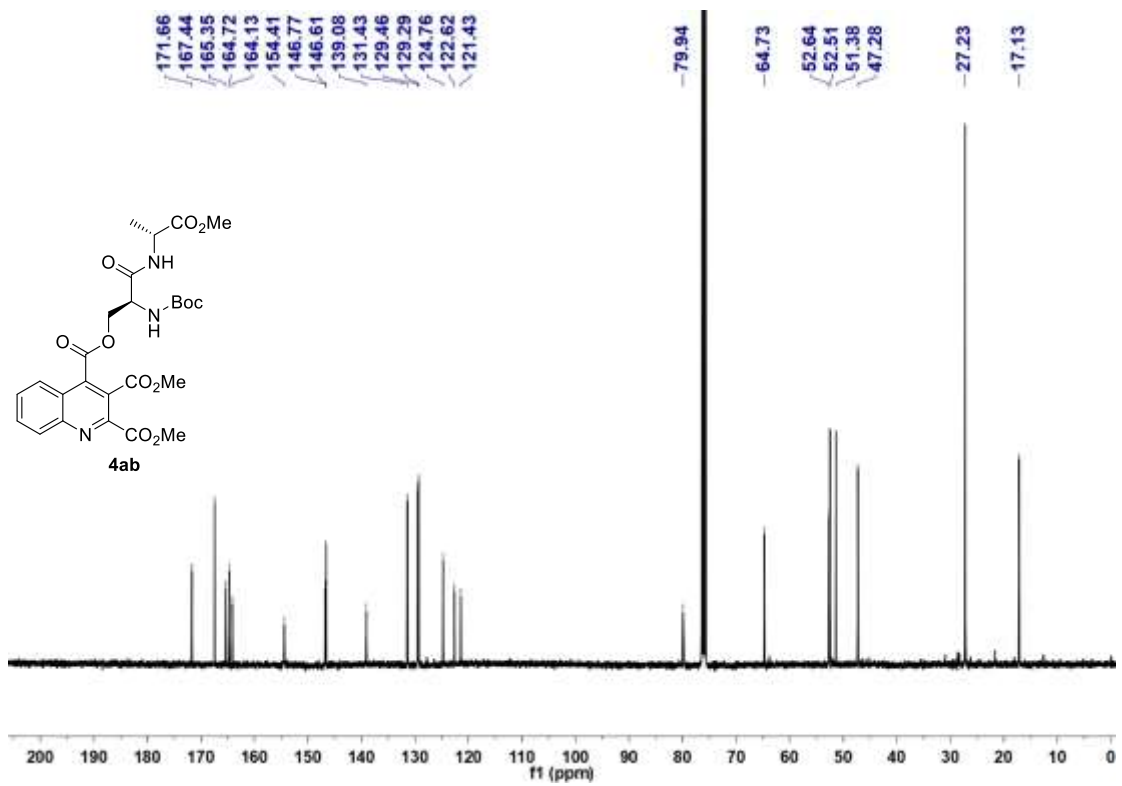

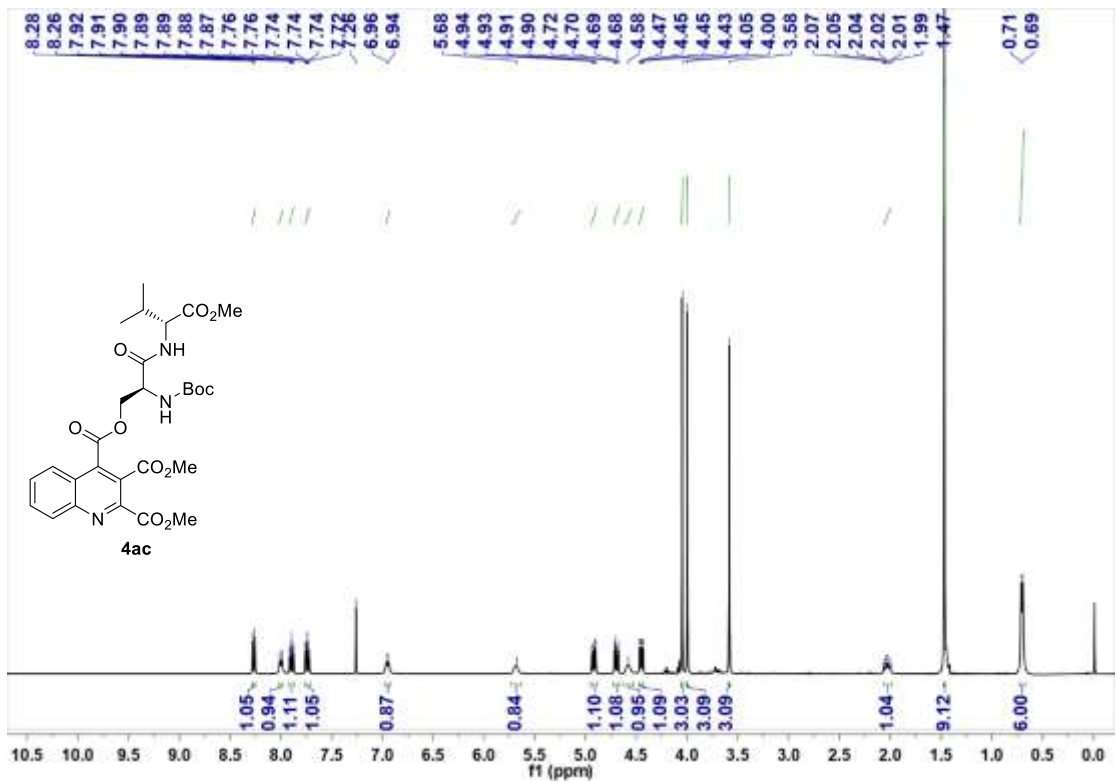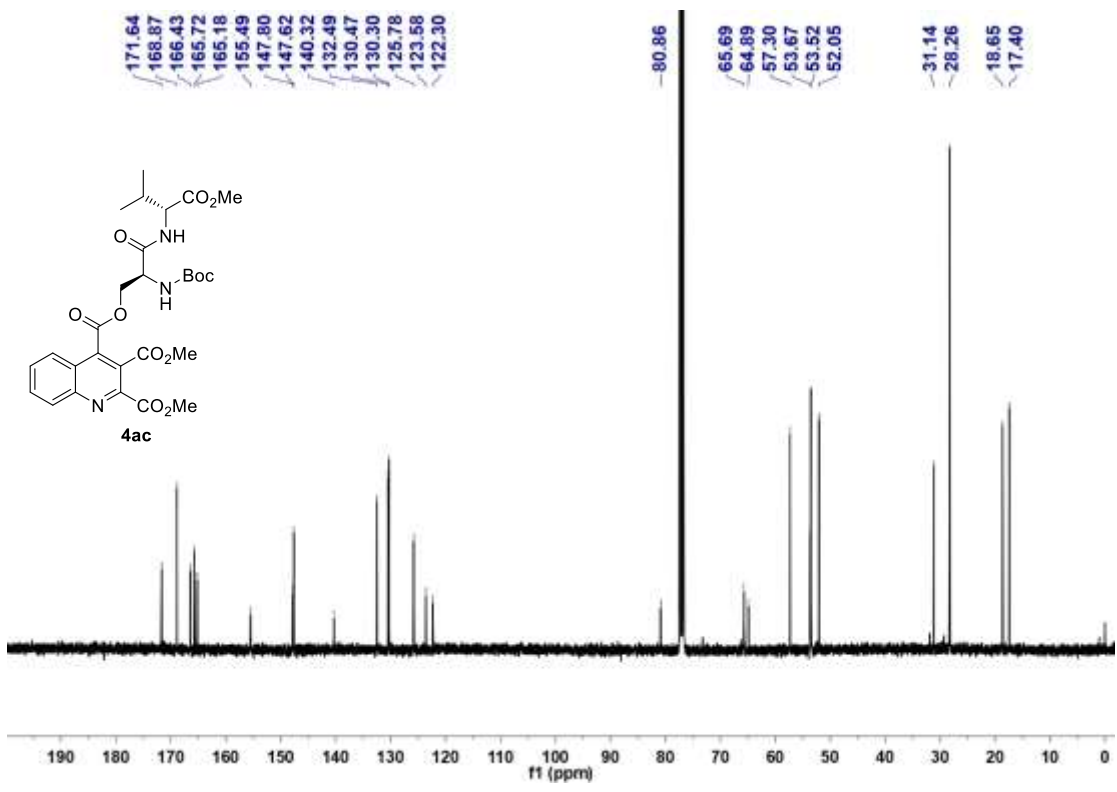

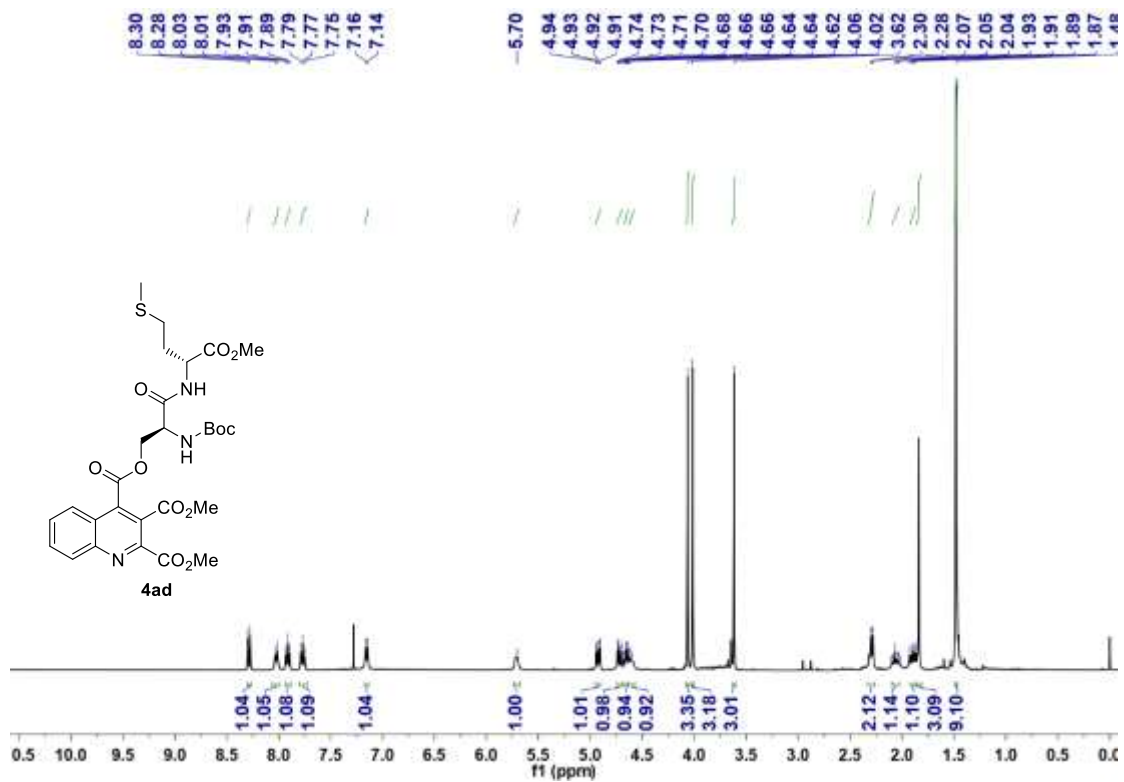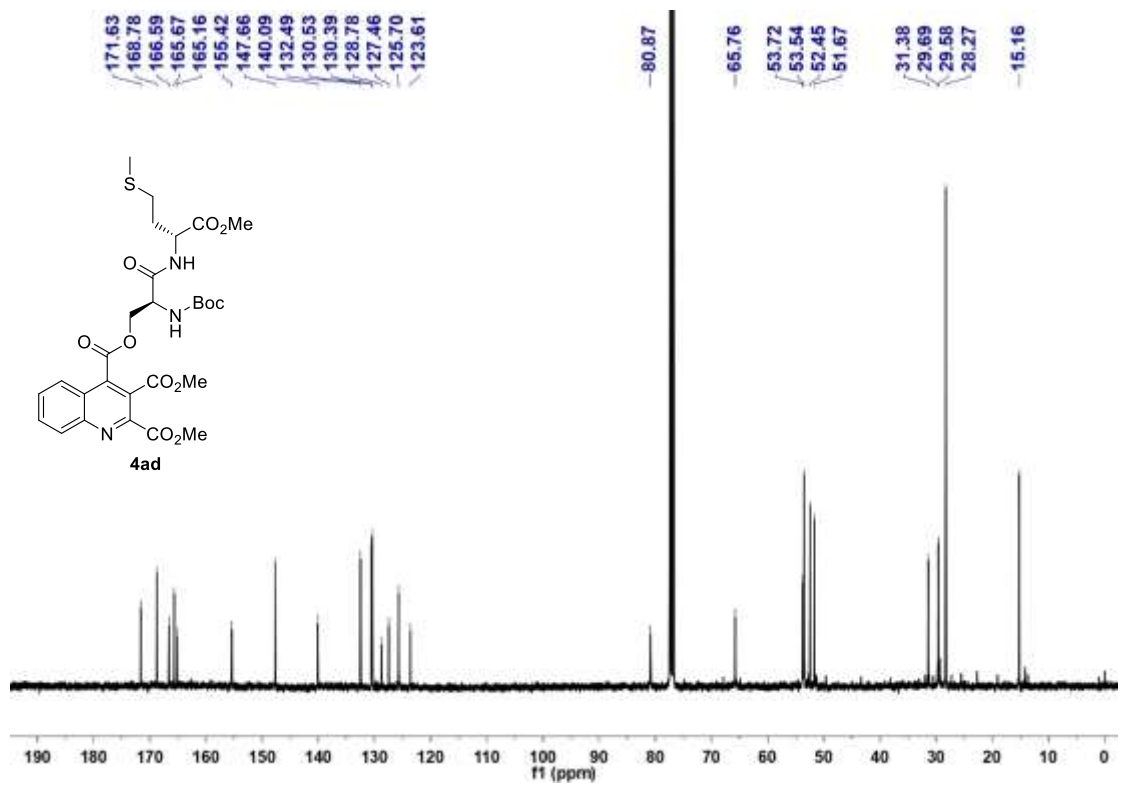

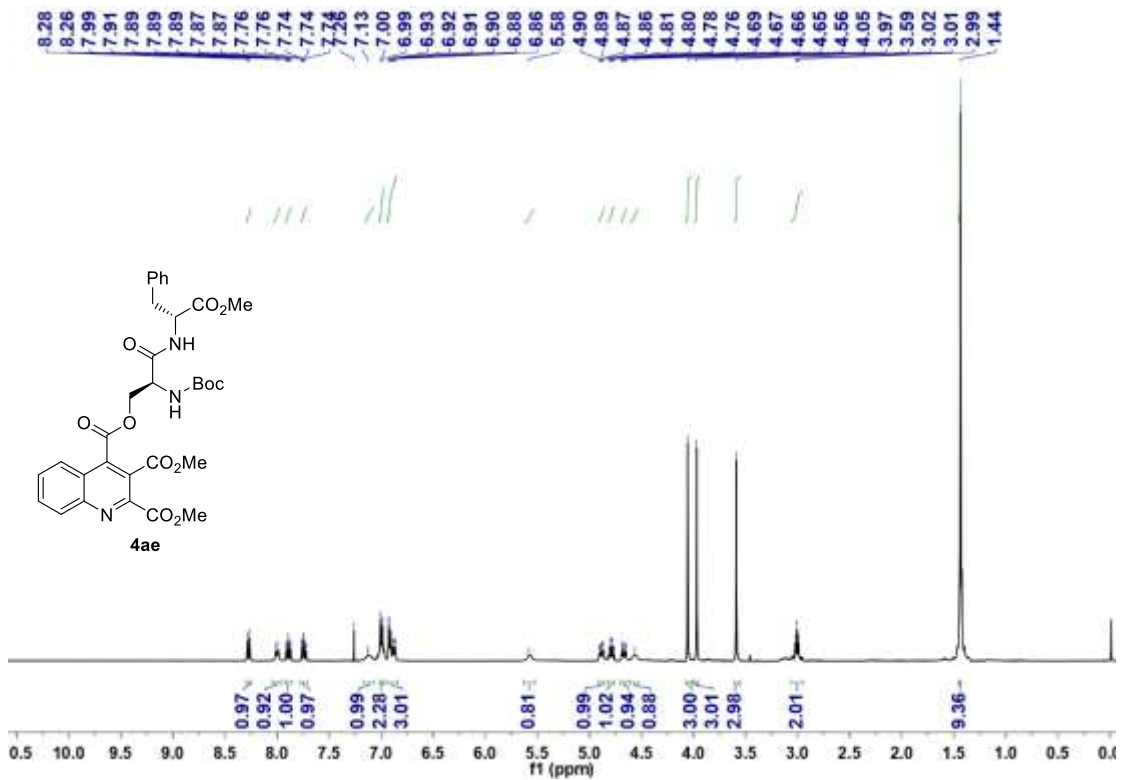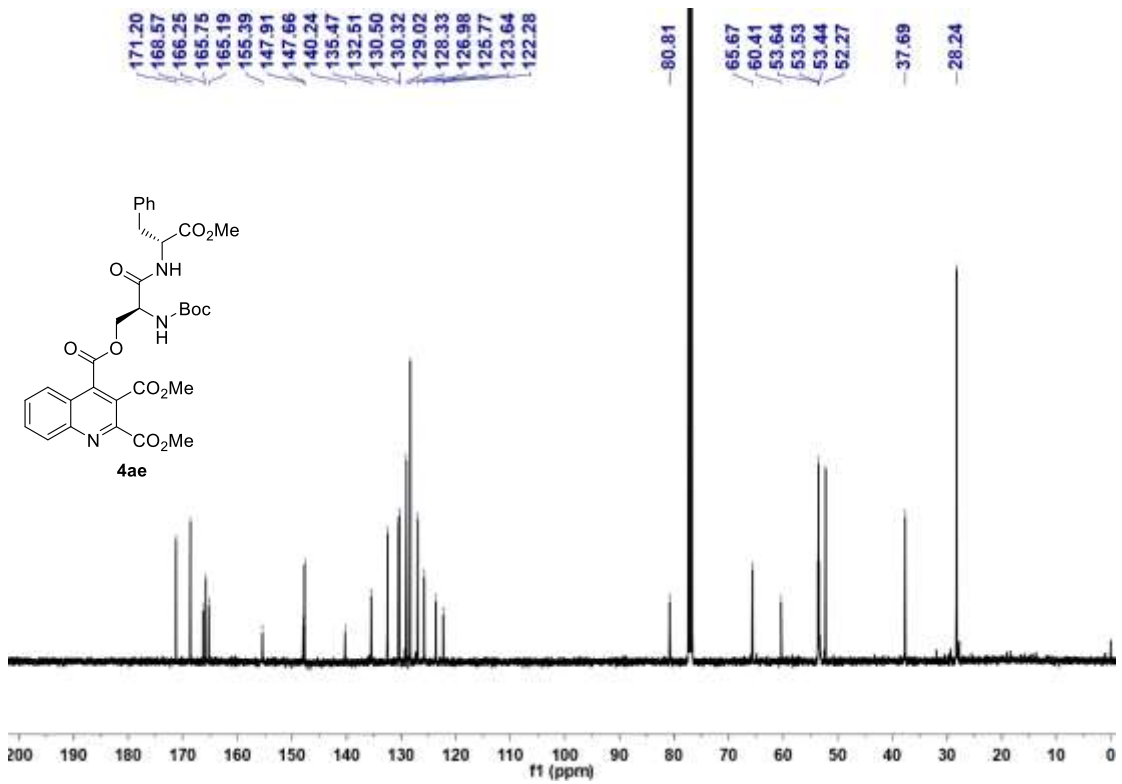

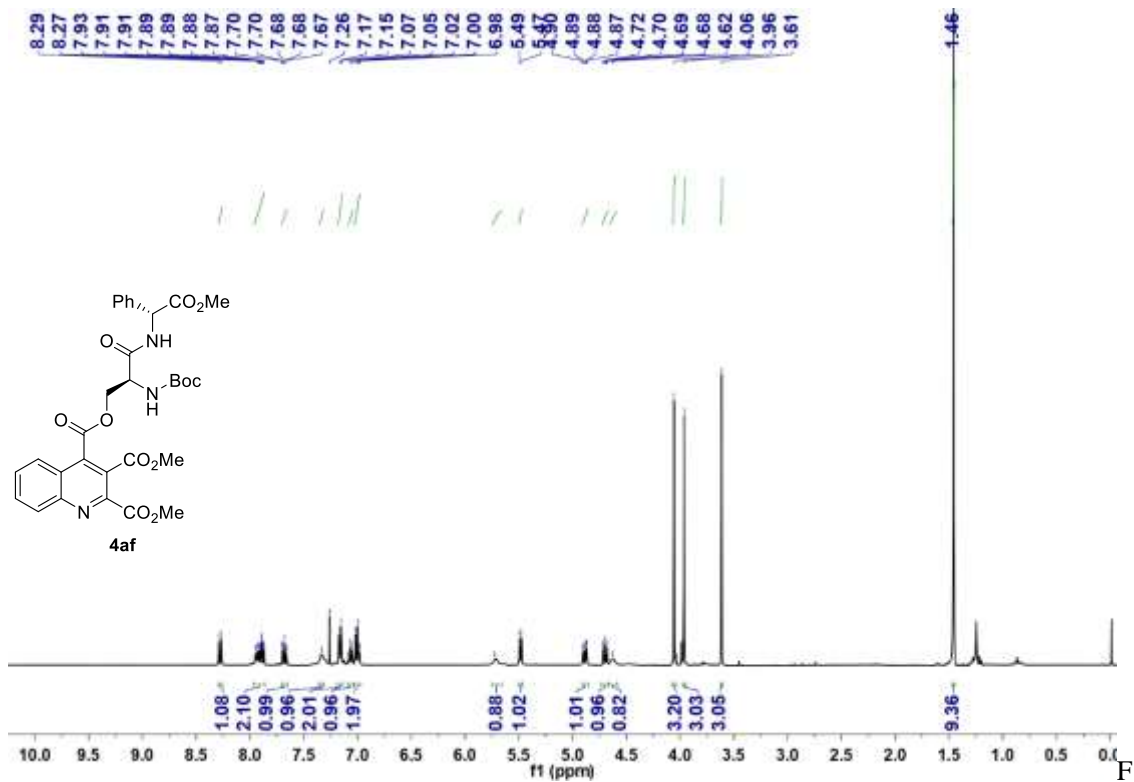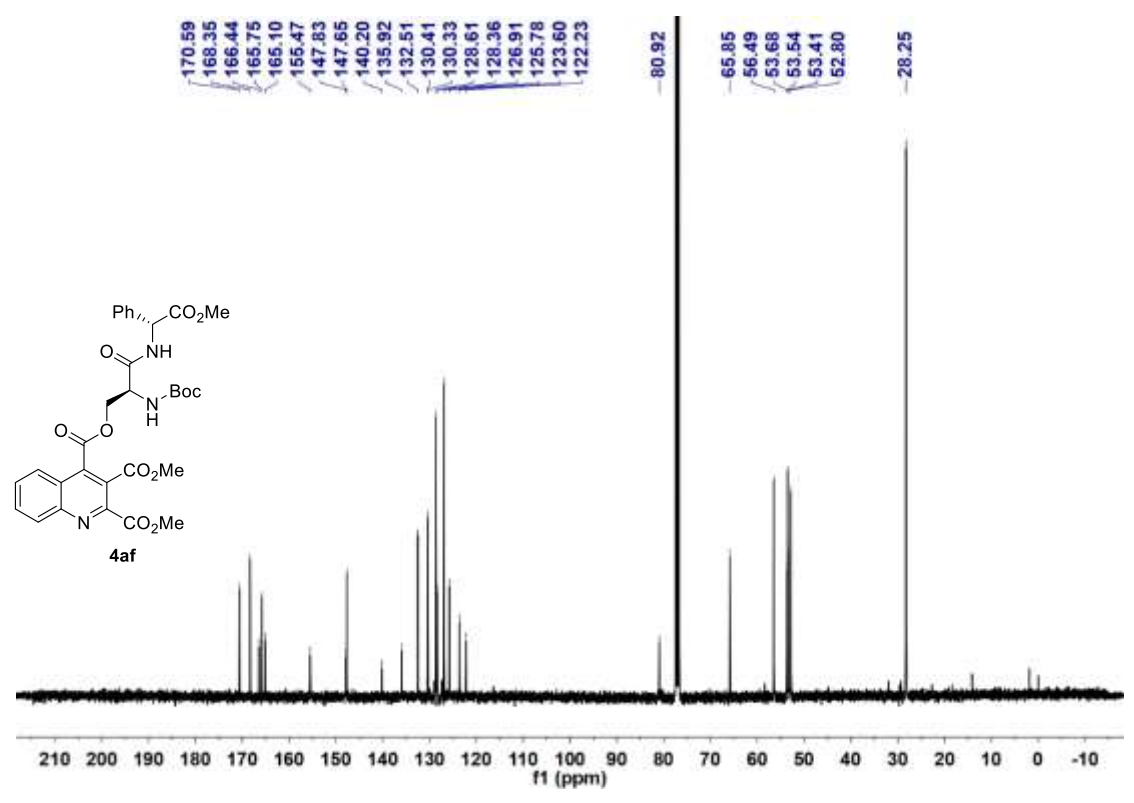

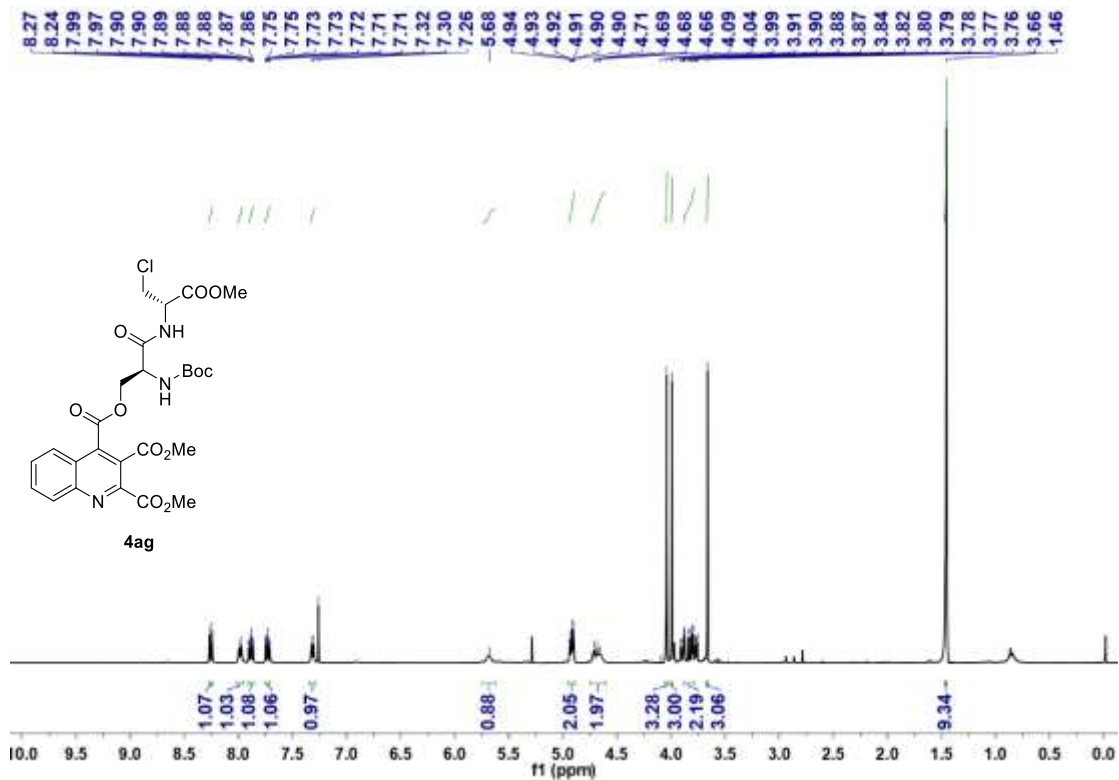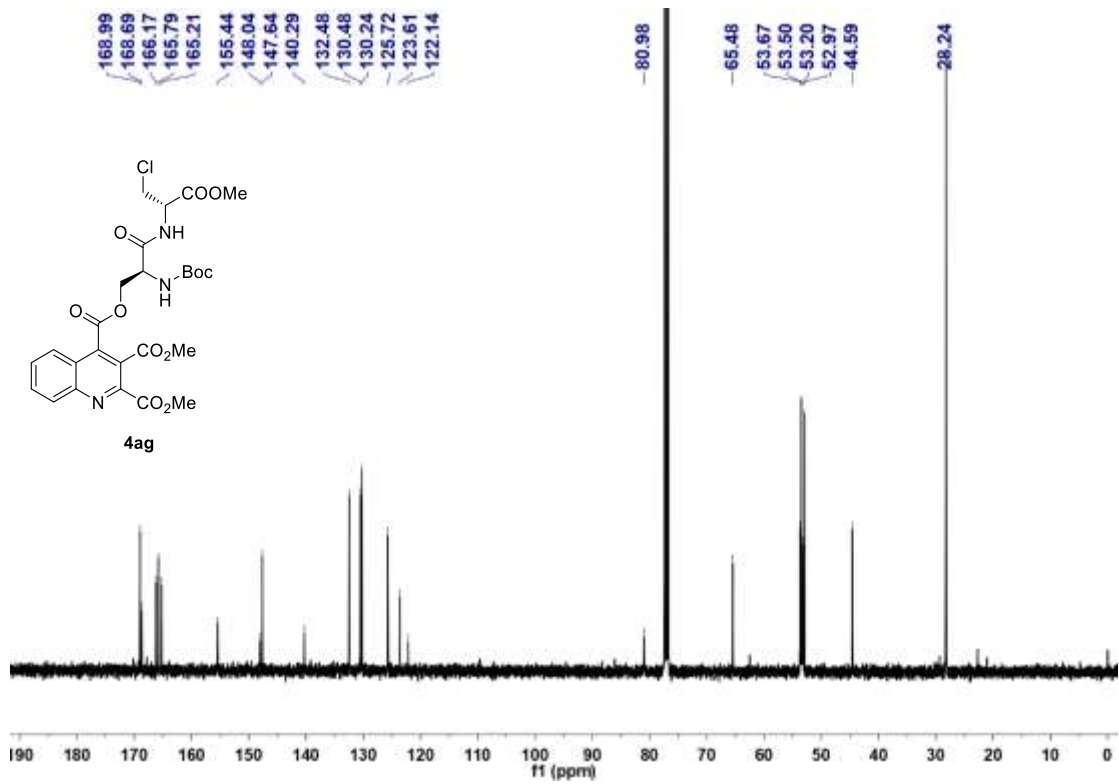

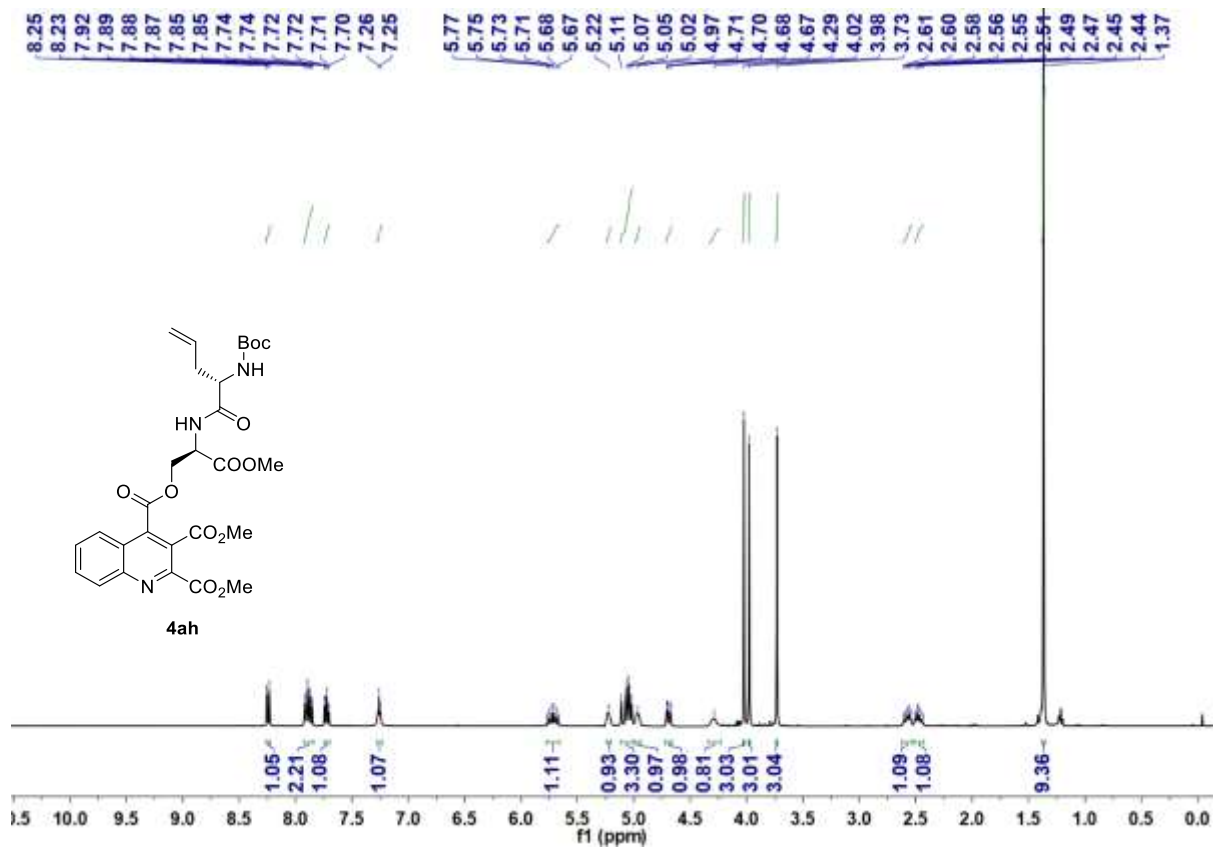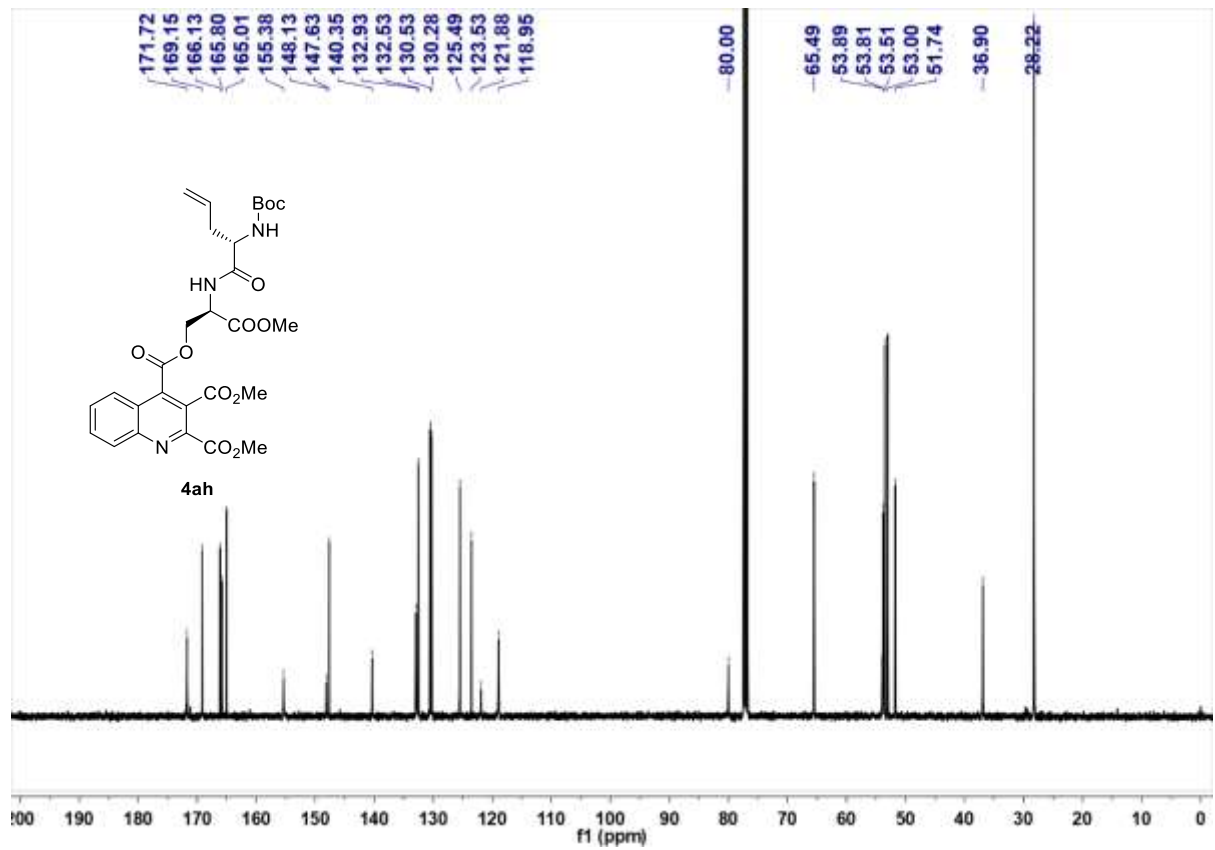



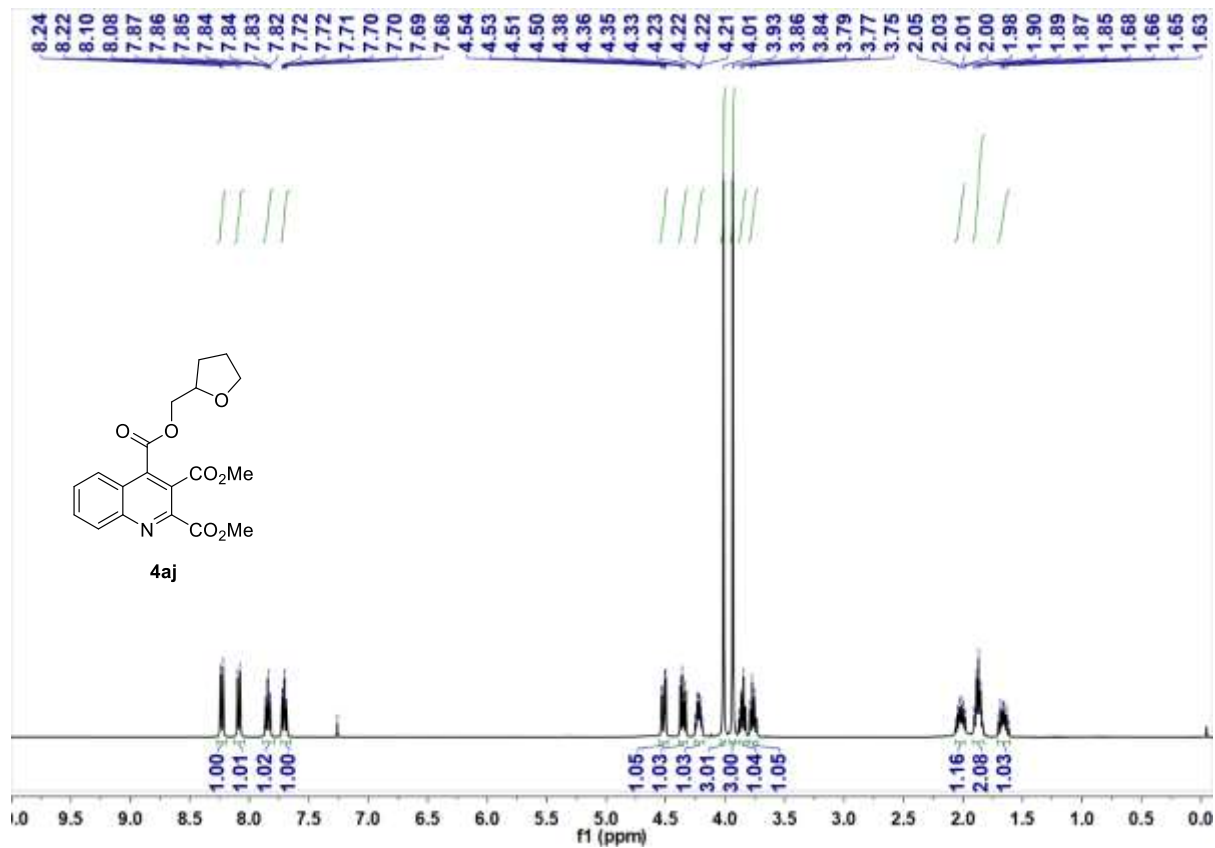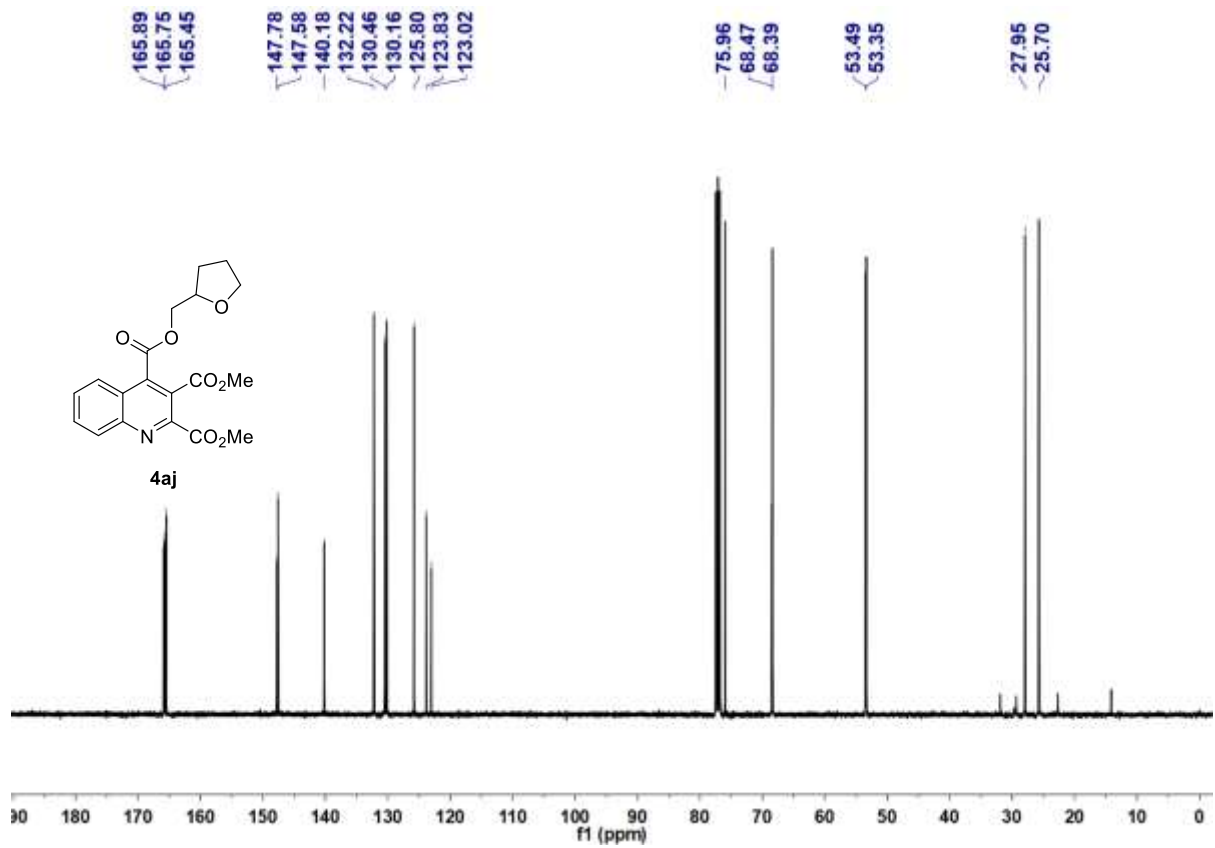

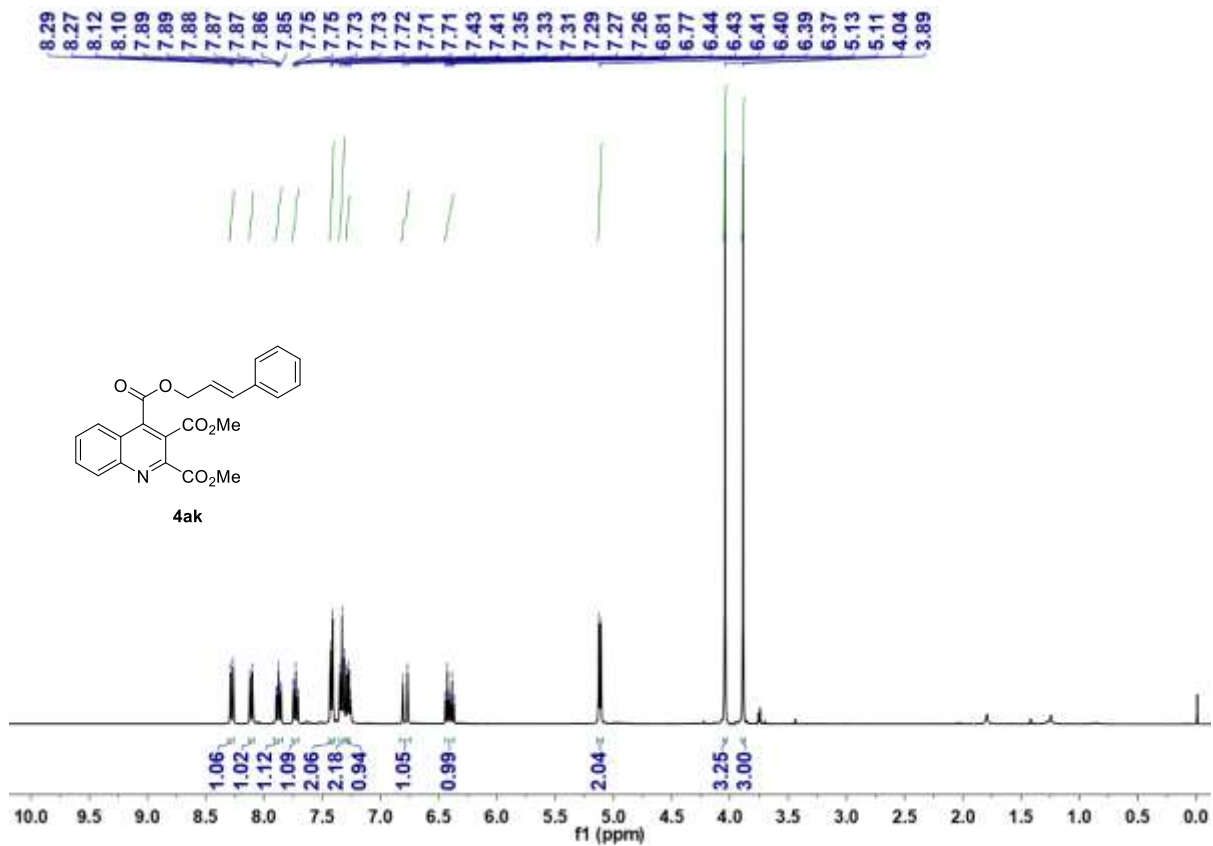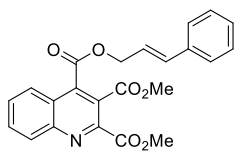

4ak

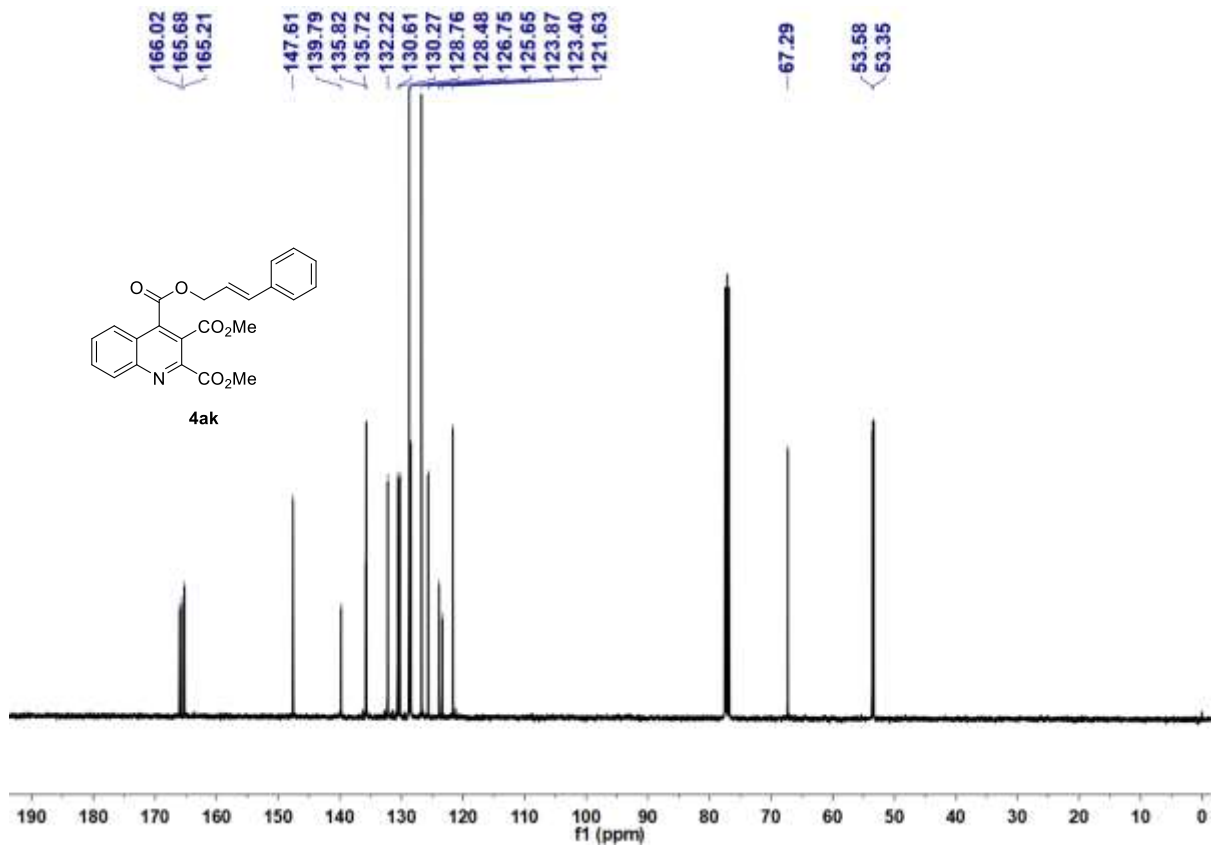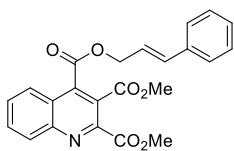

4ak

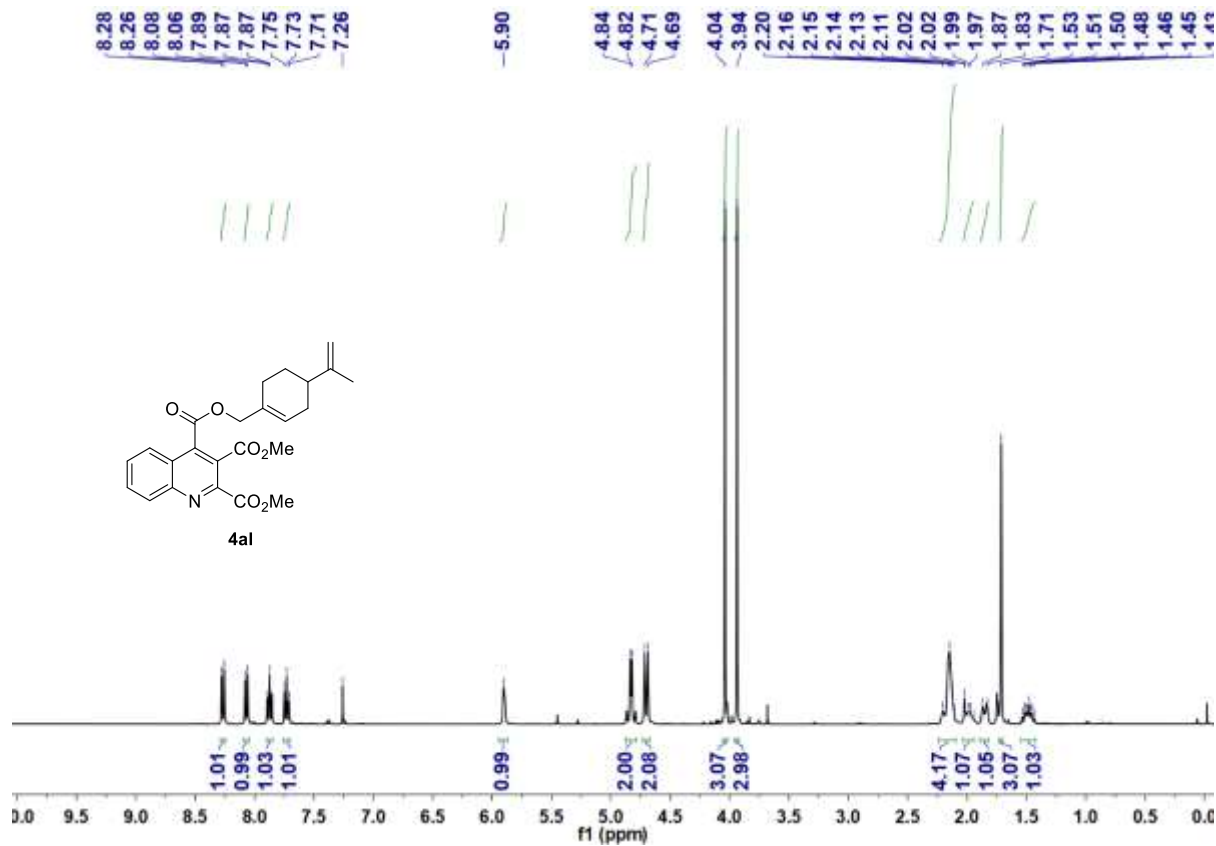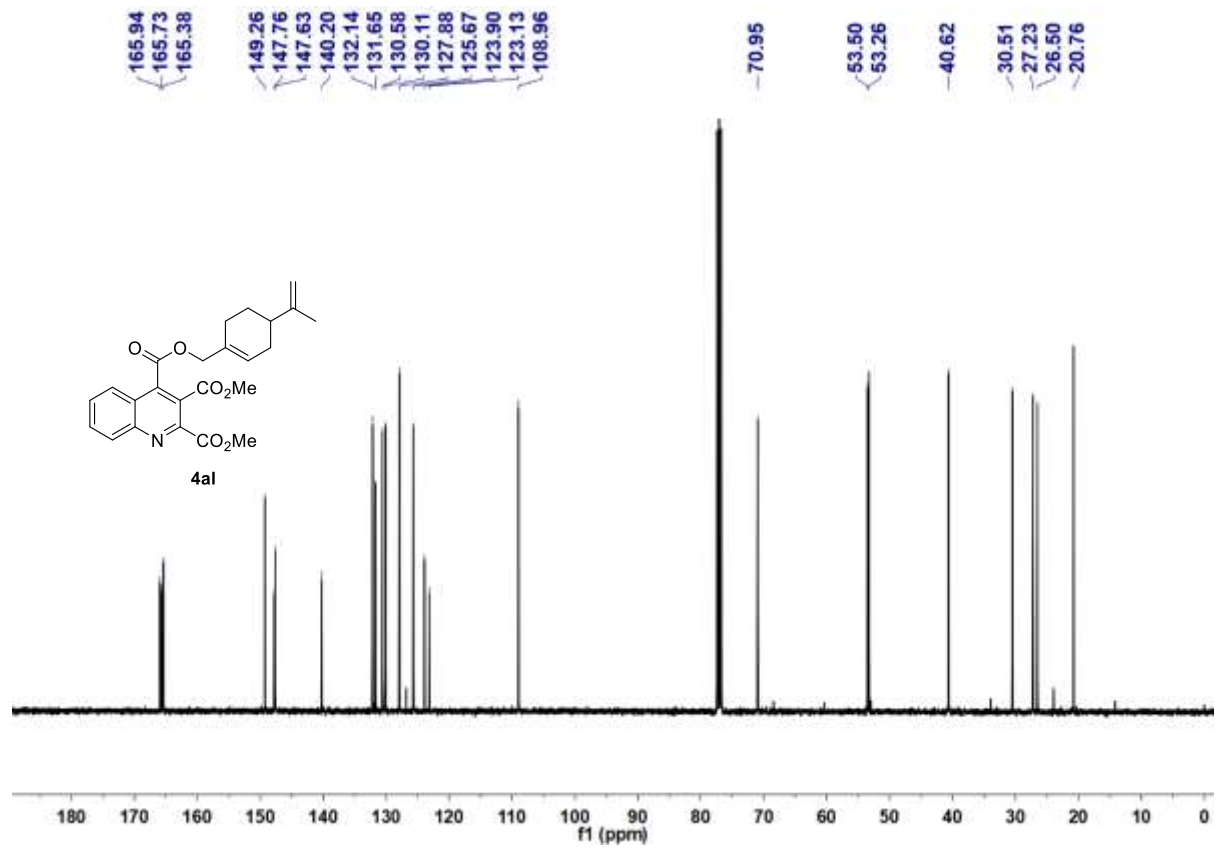

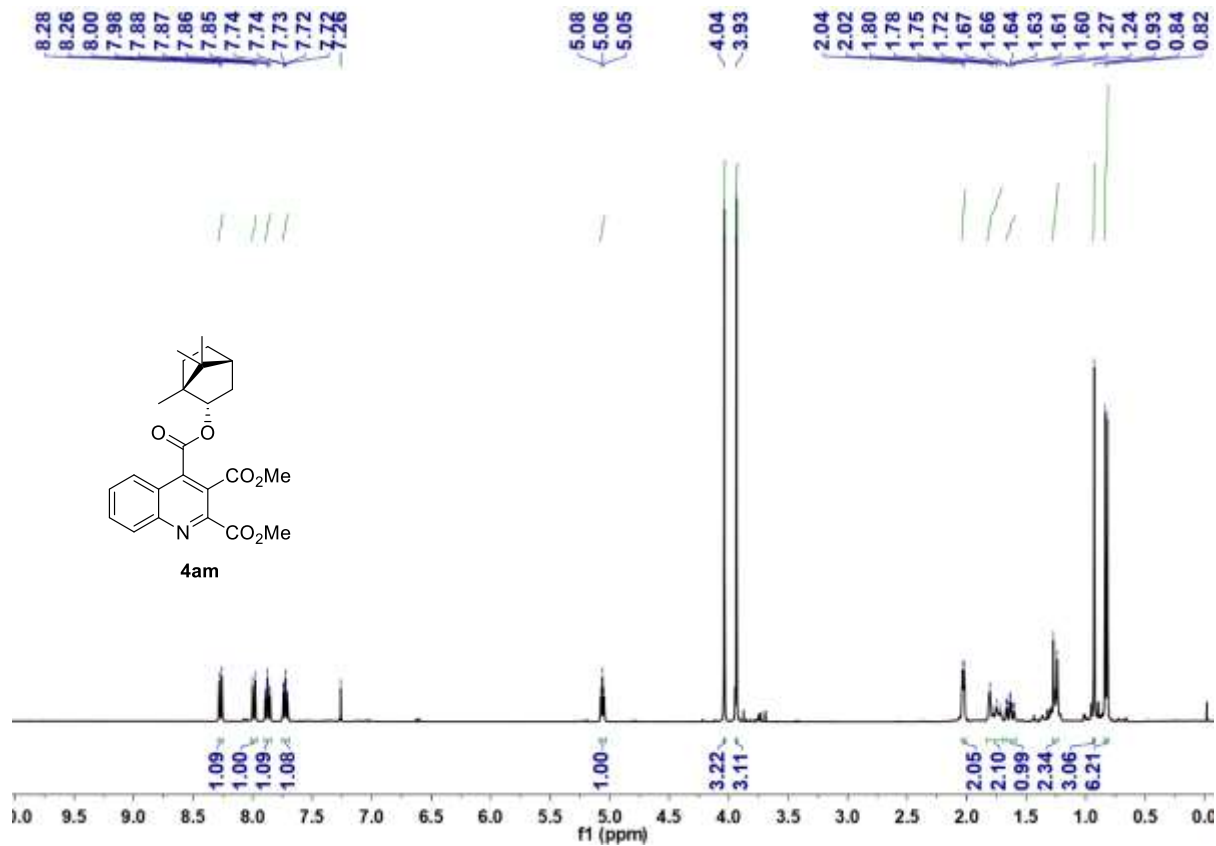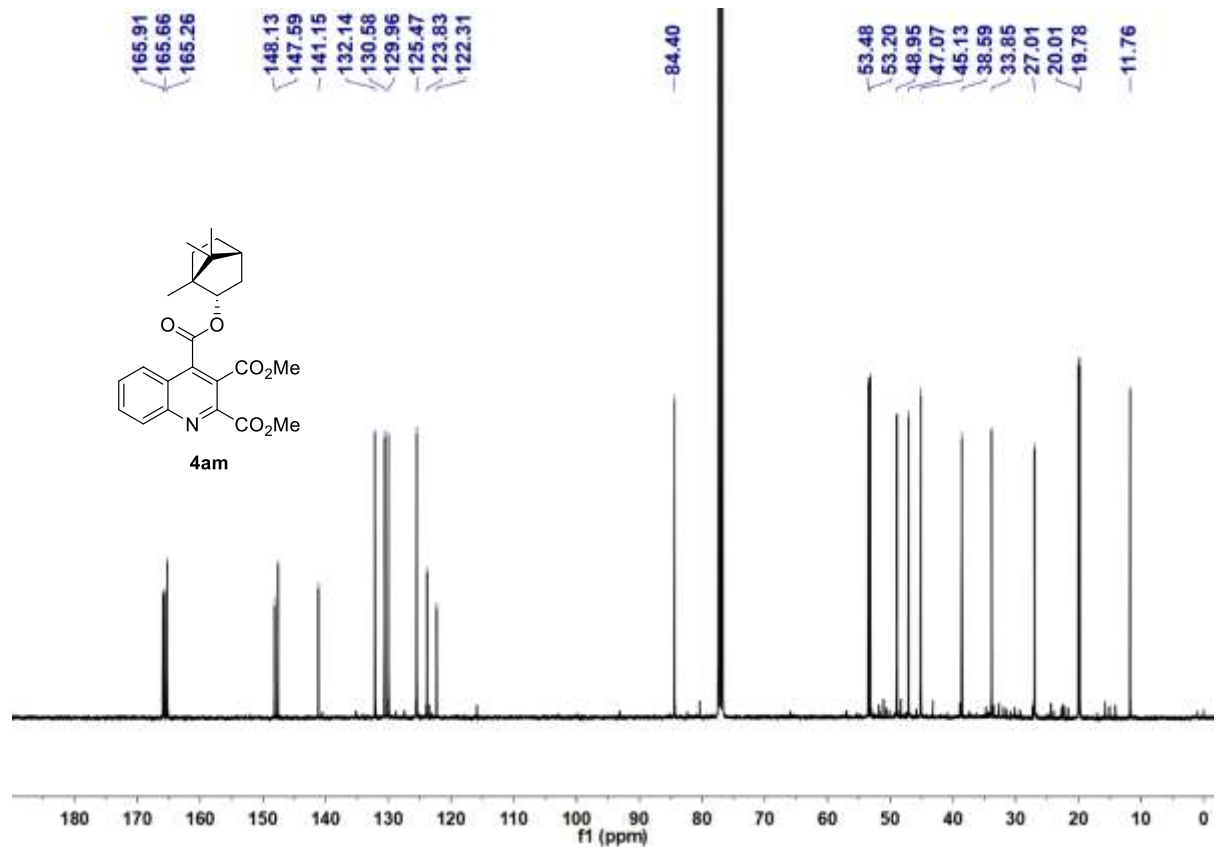

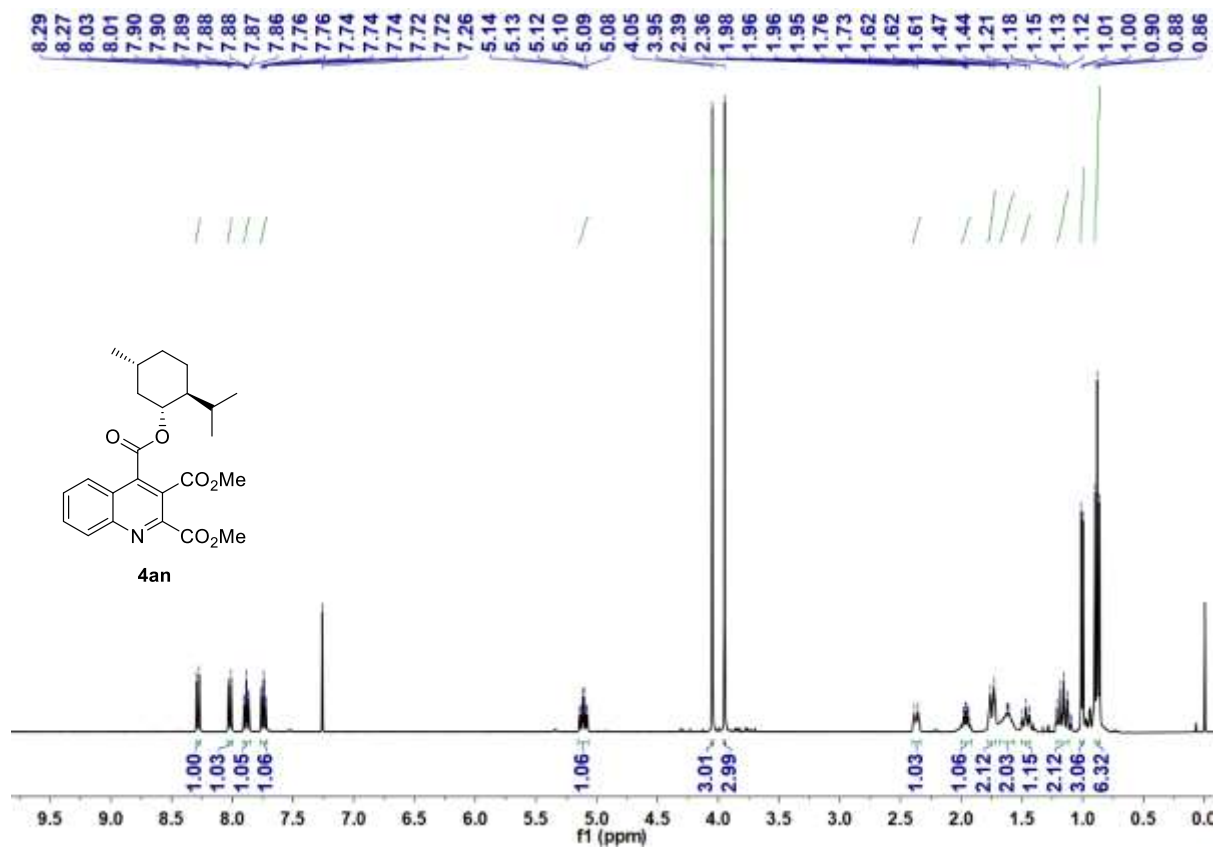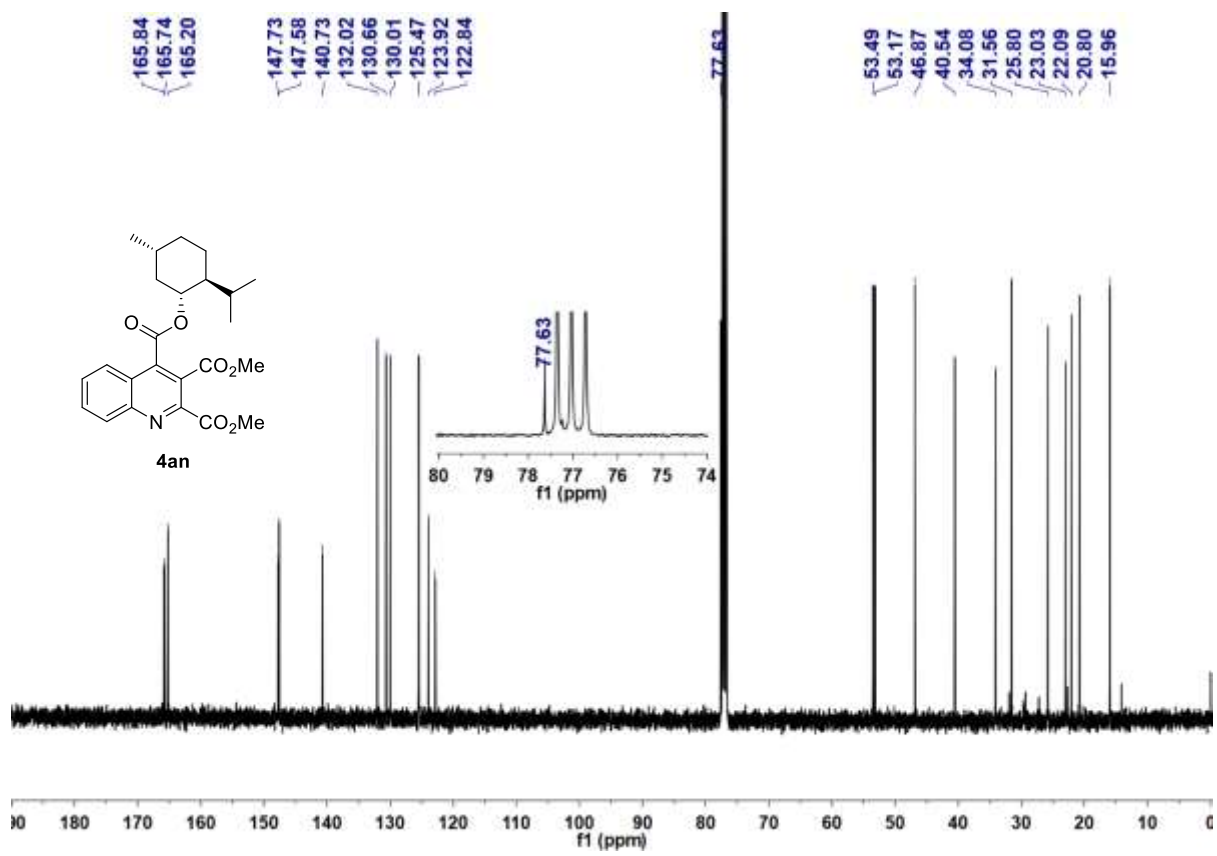

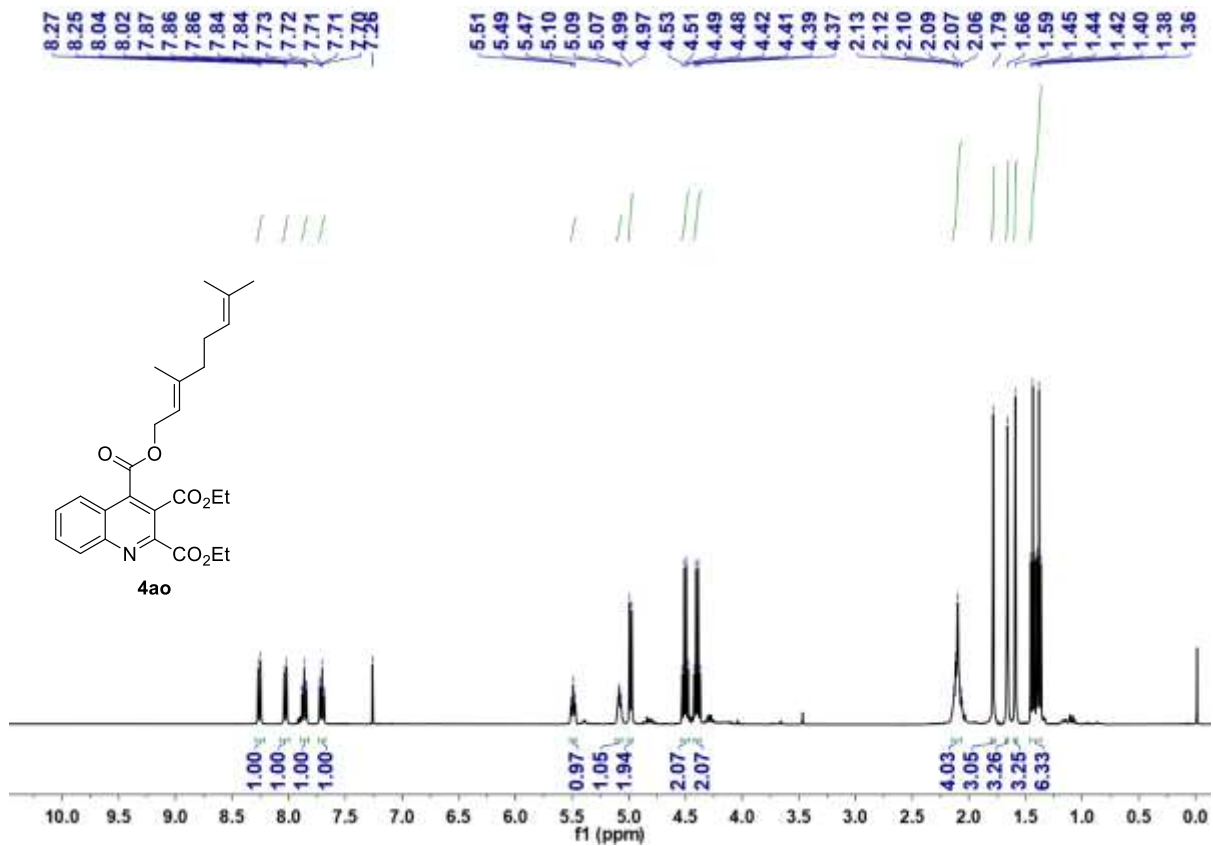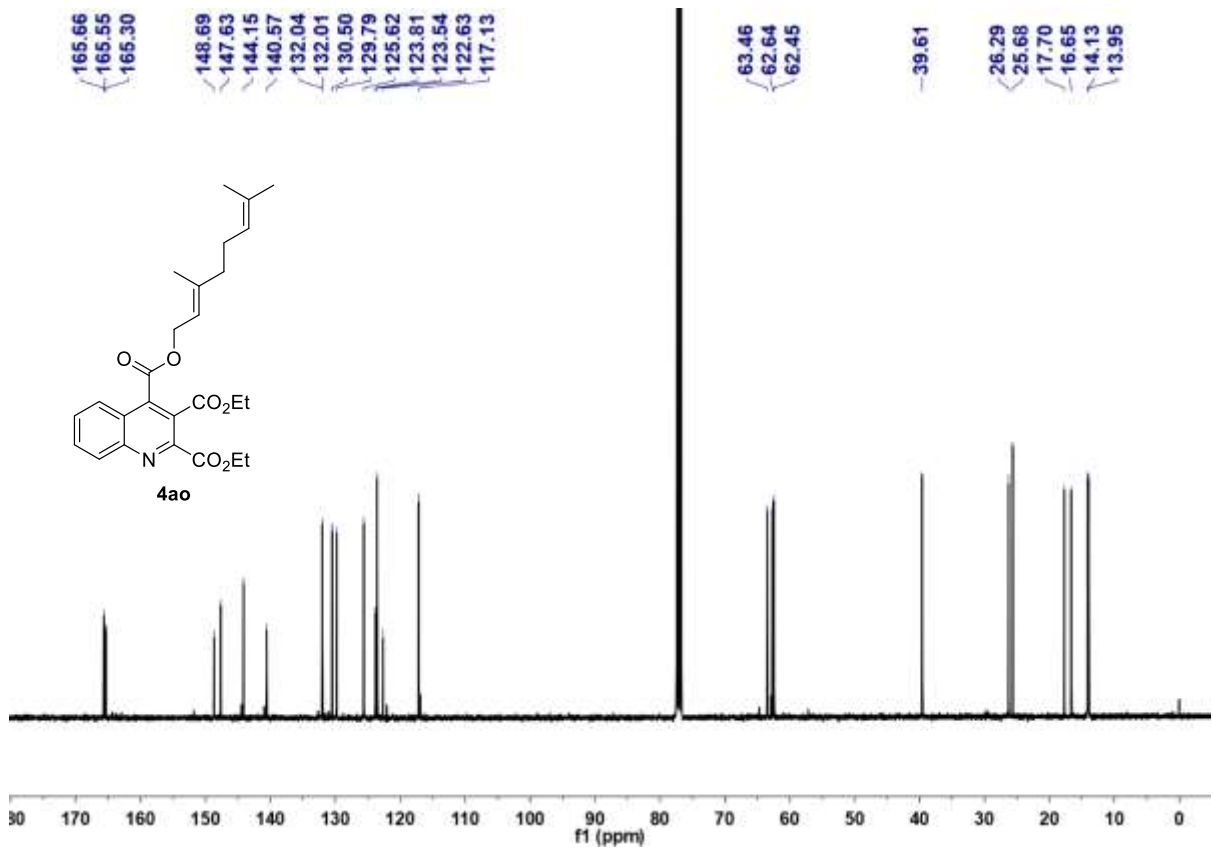

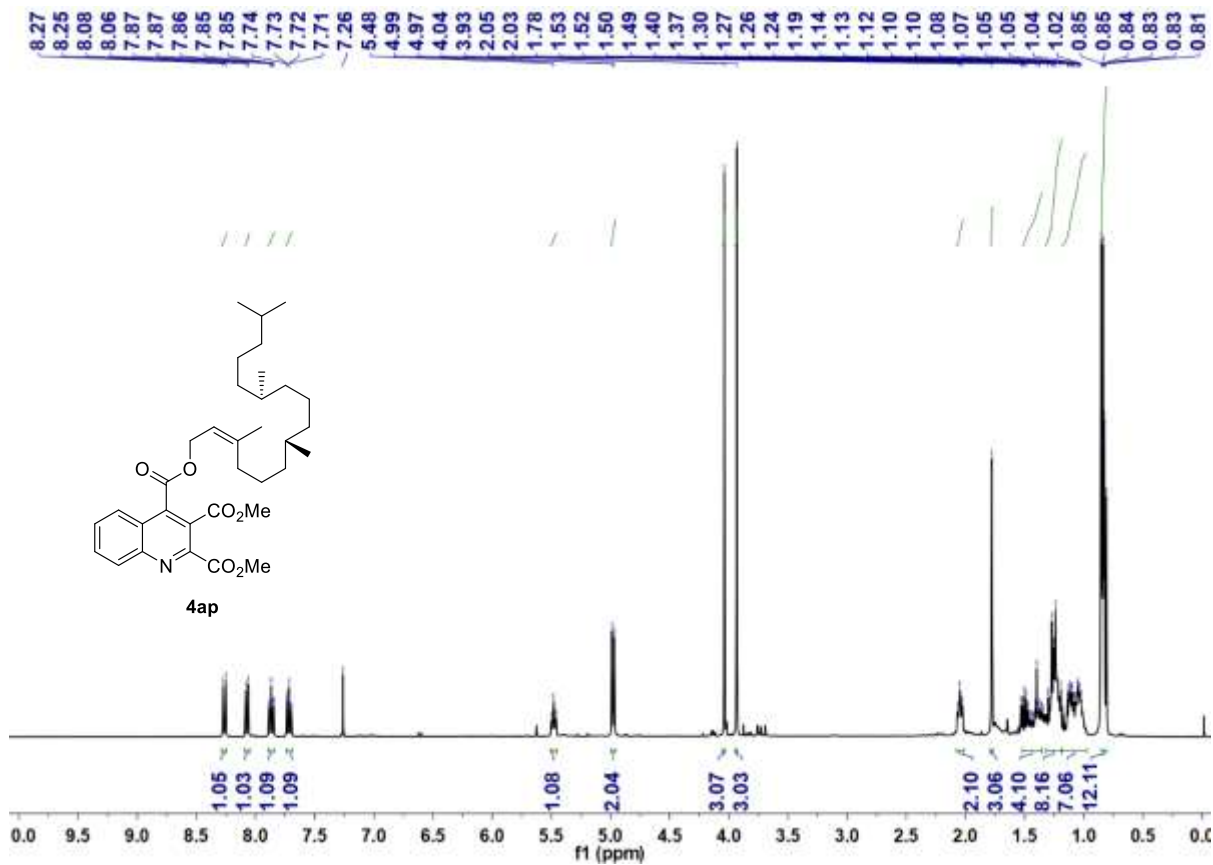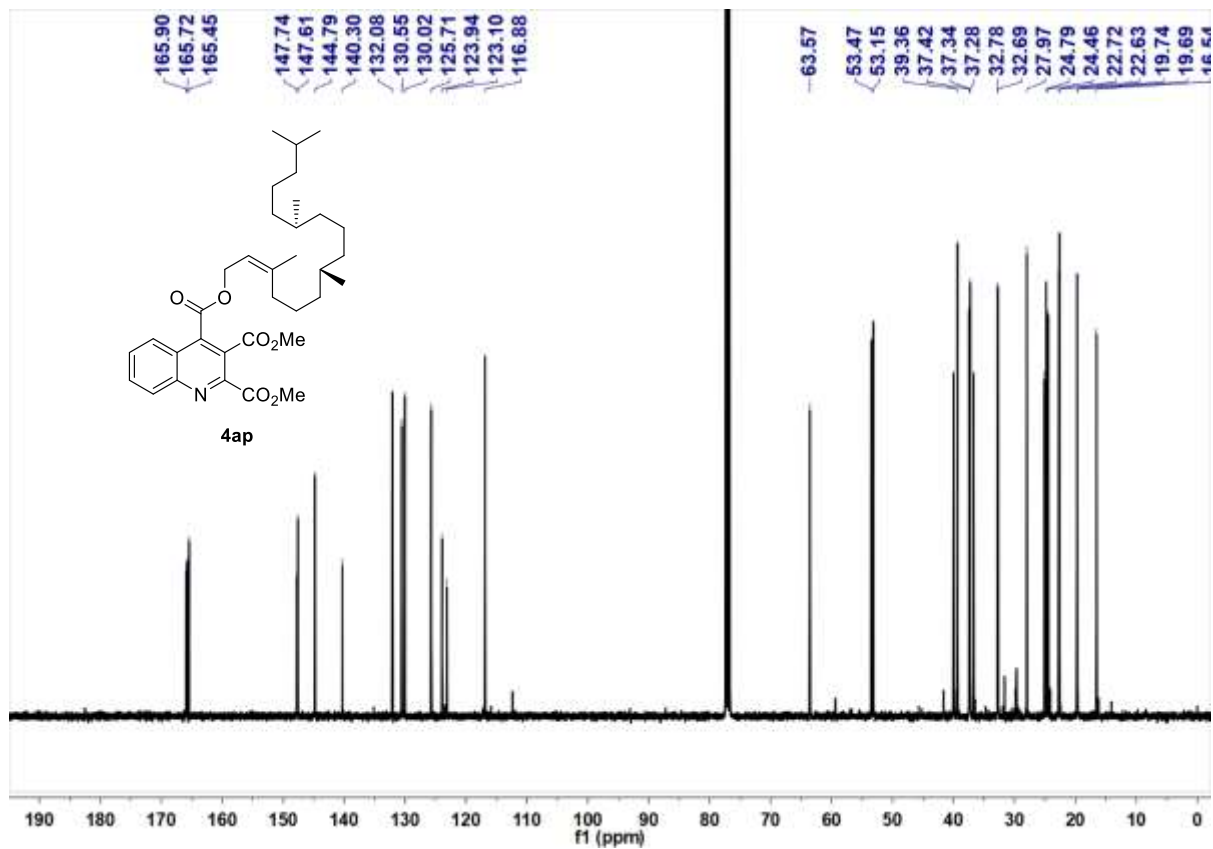



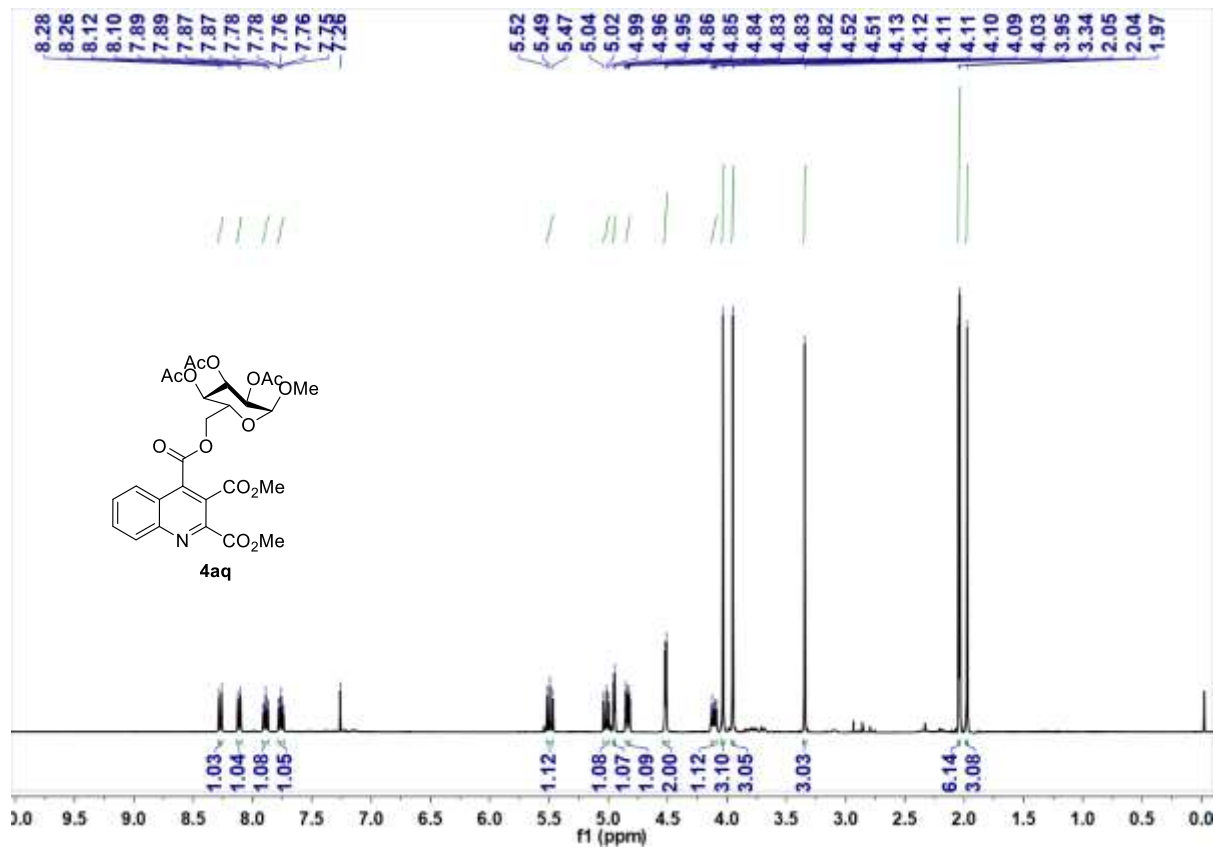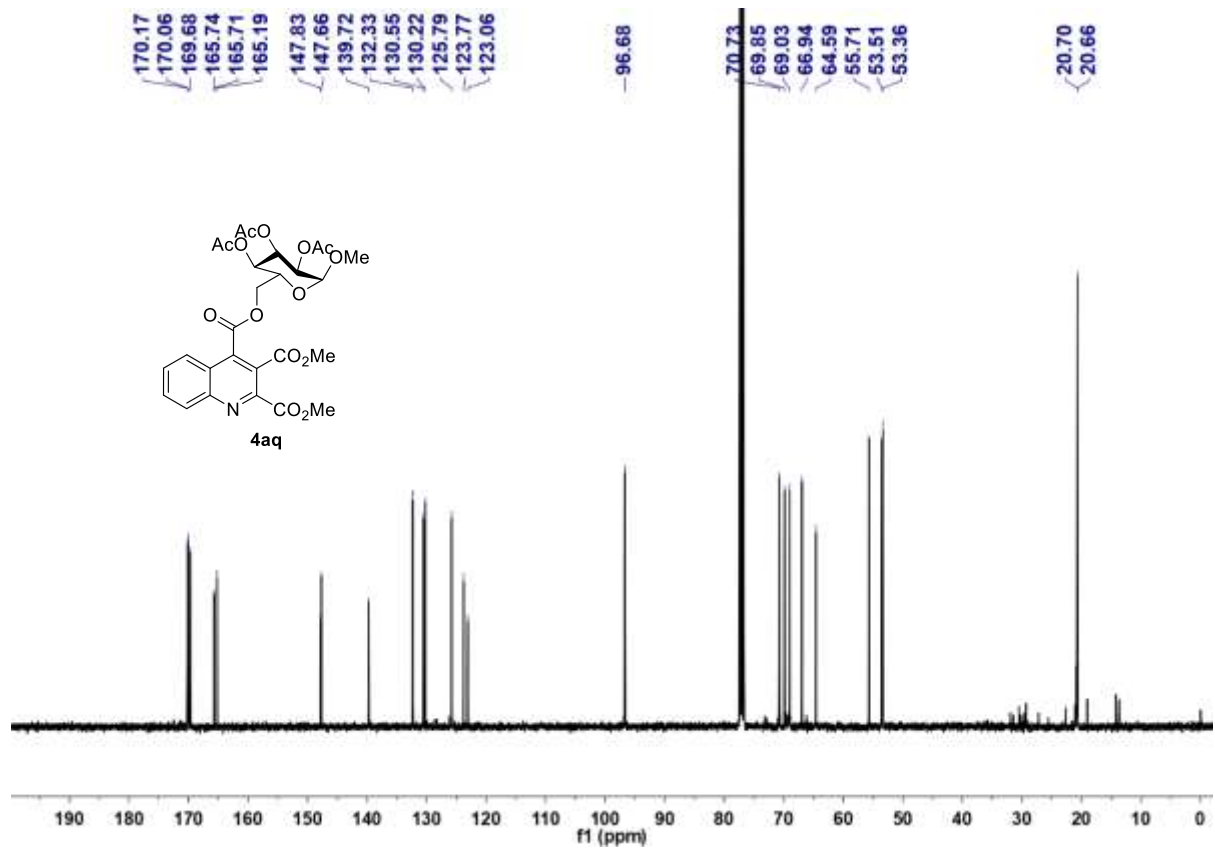



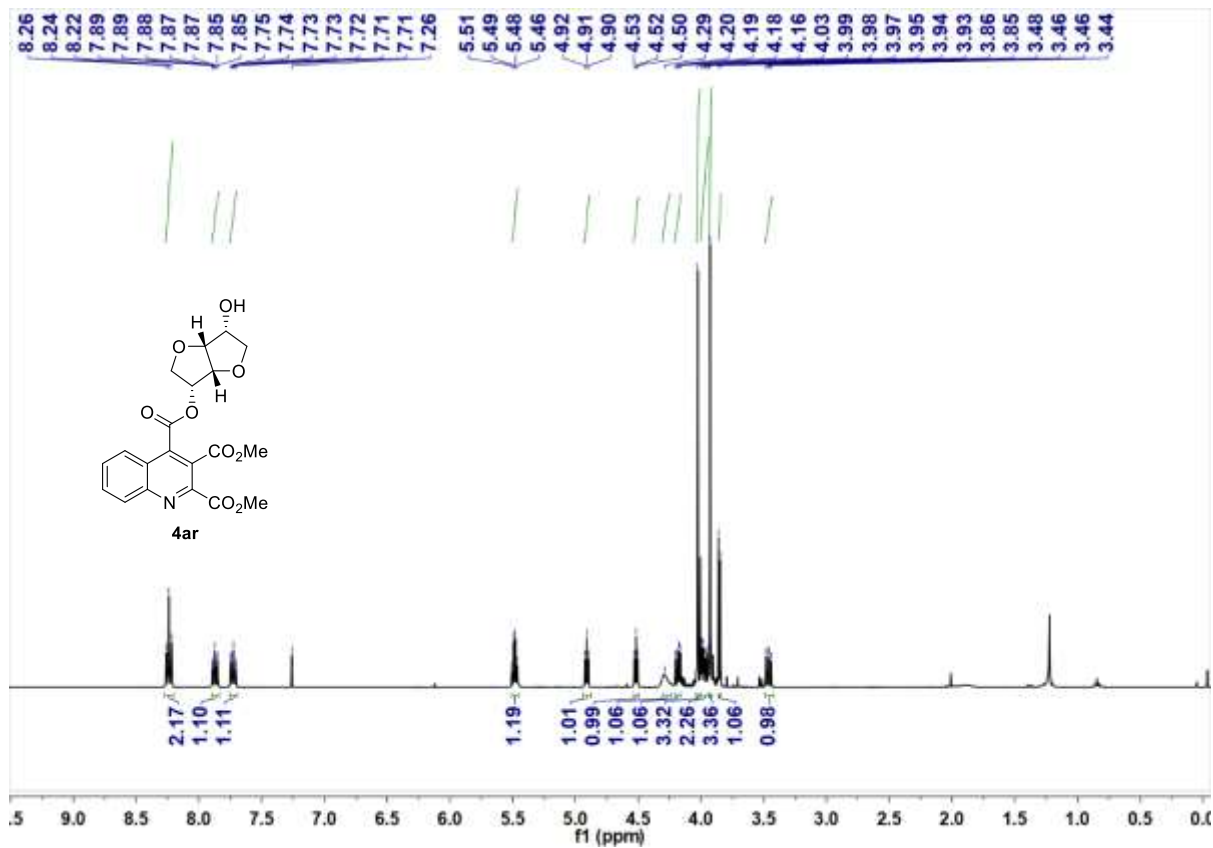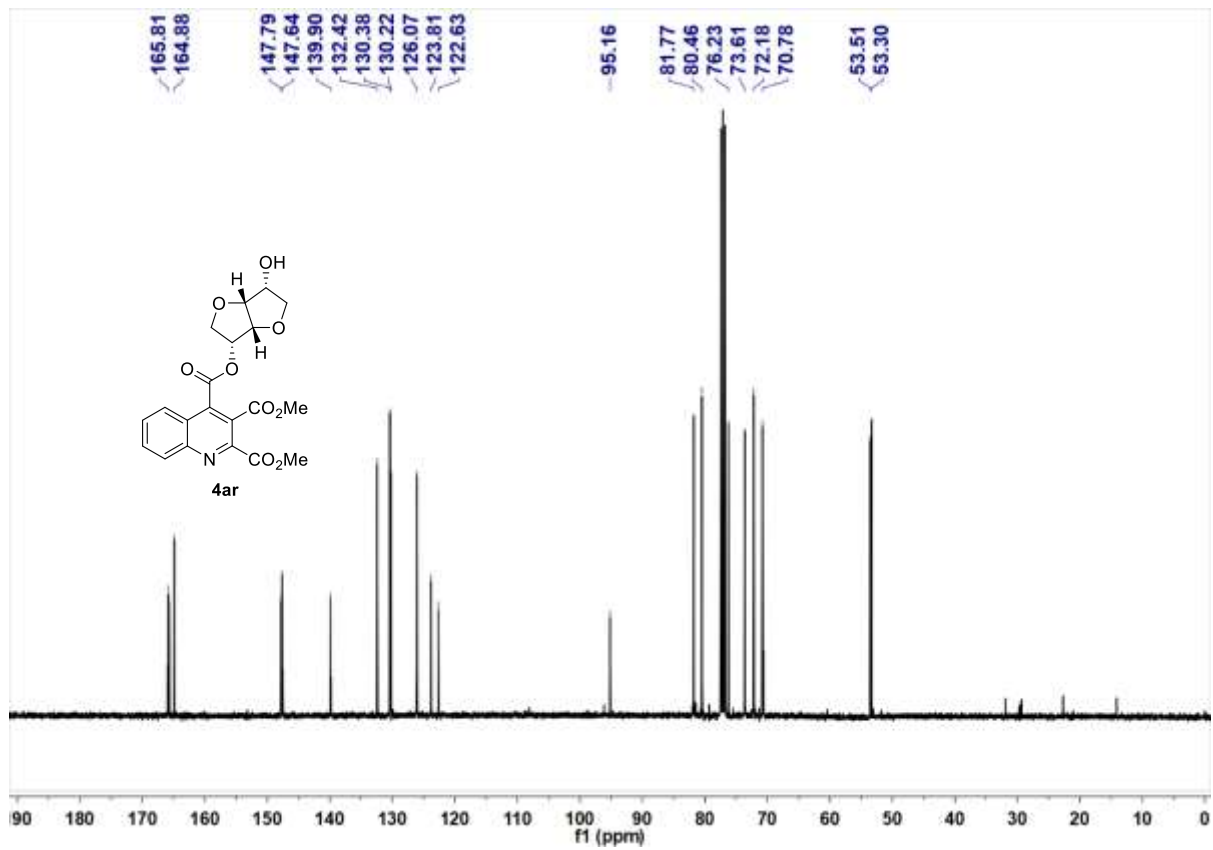

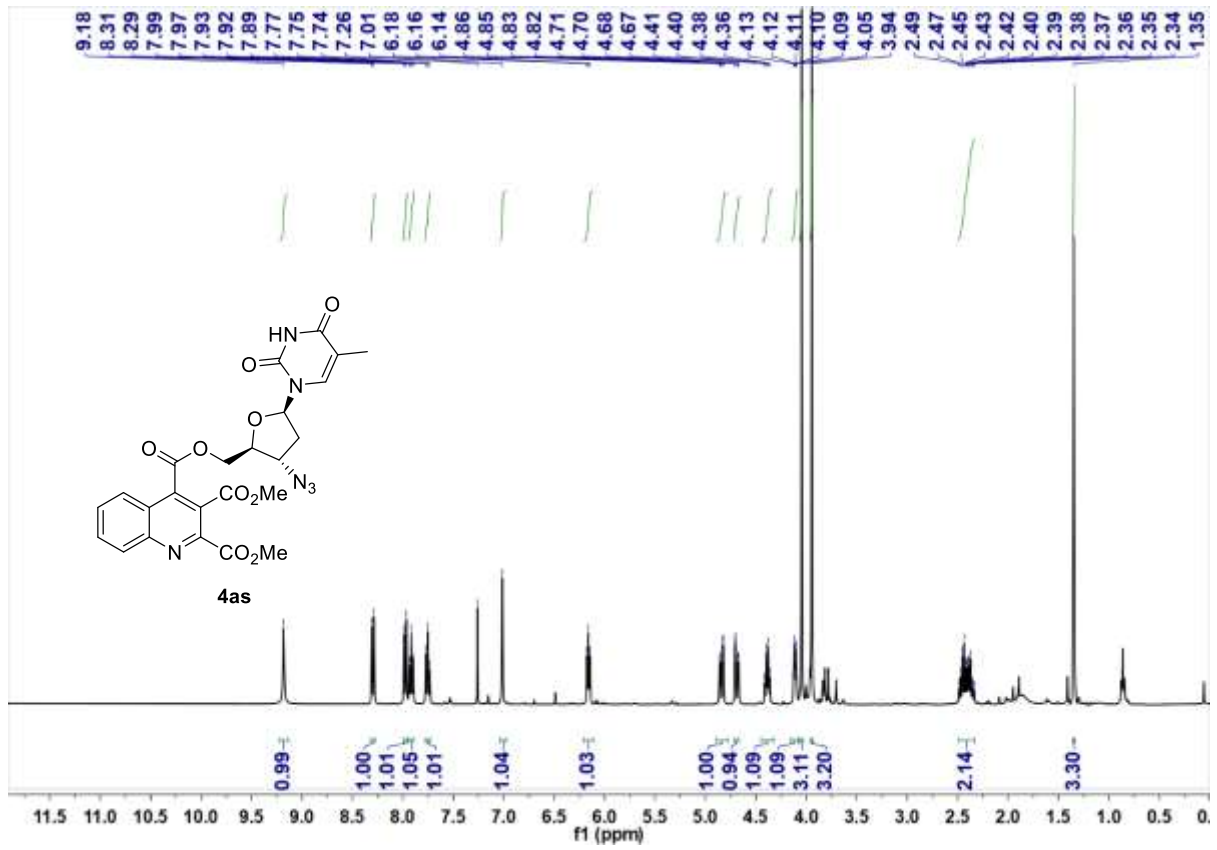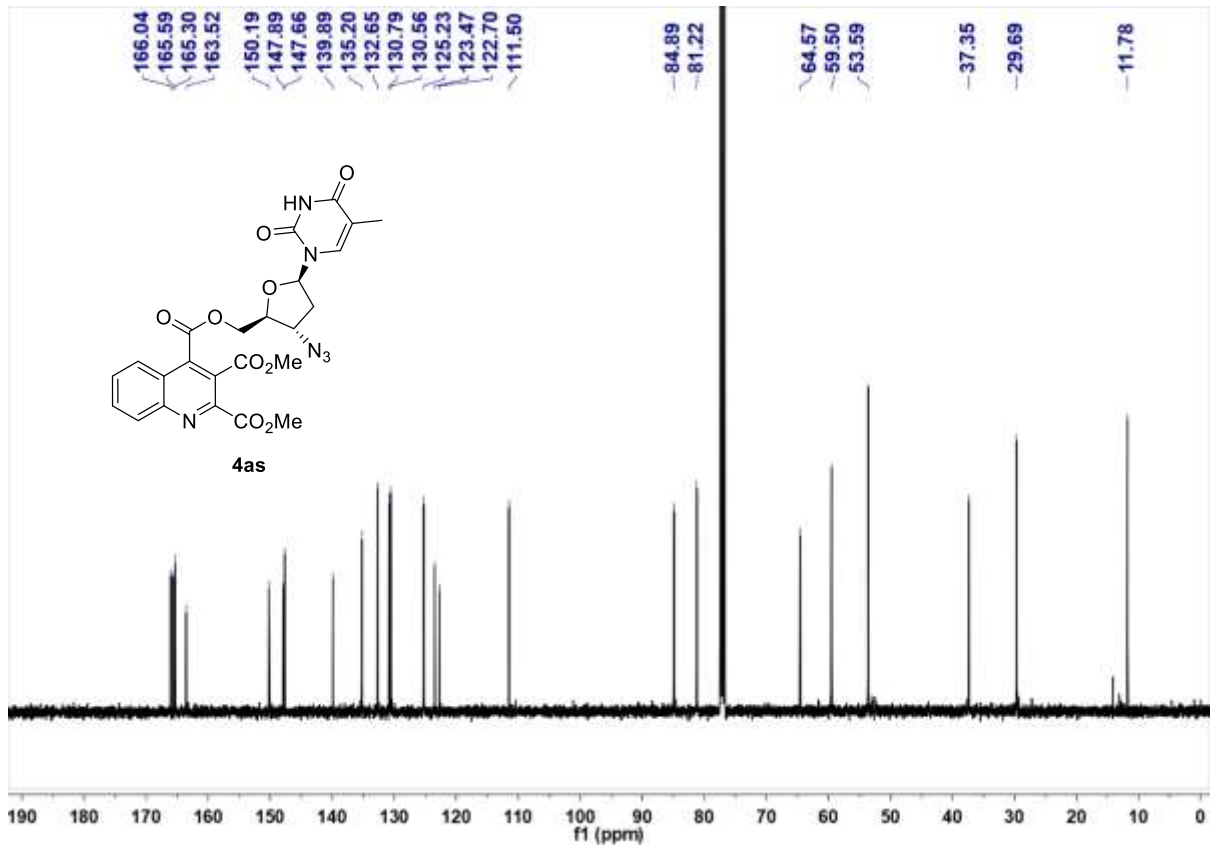

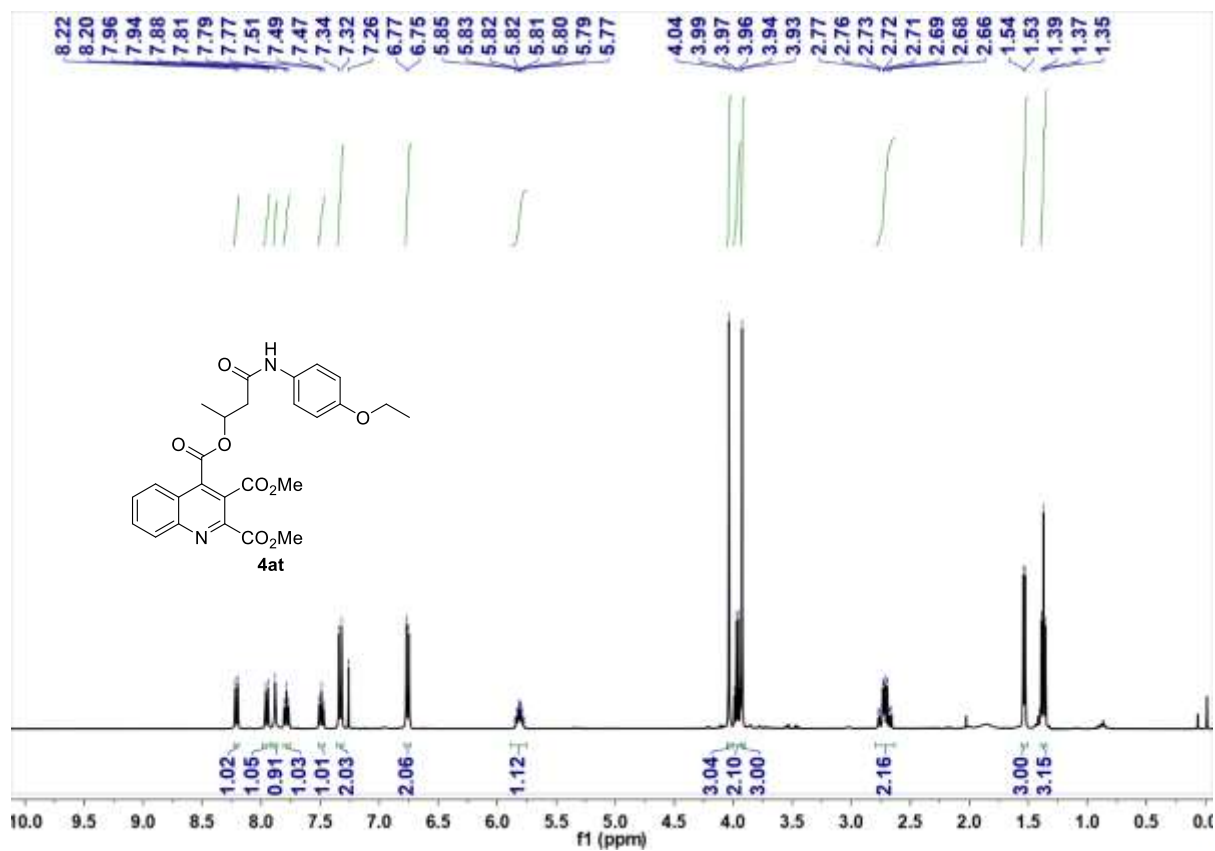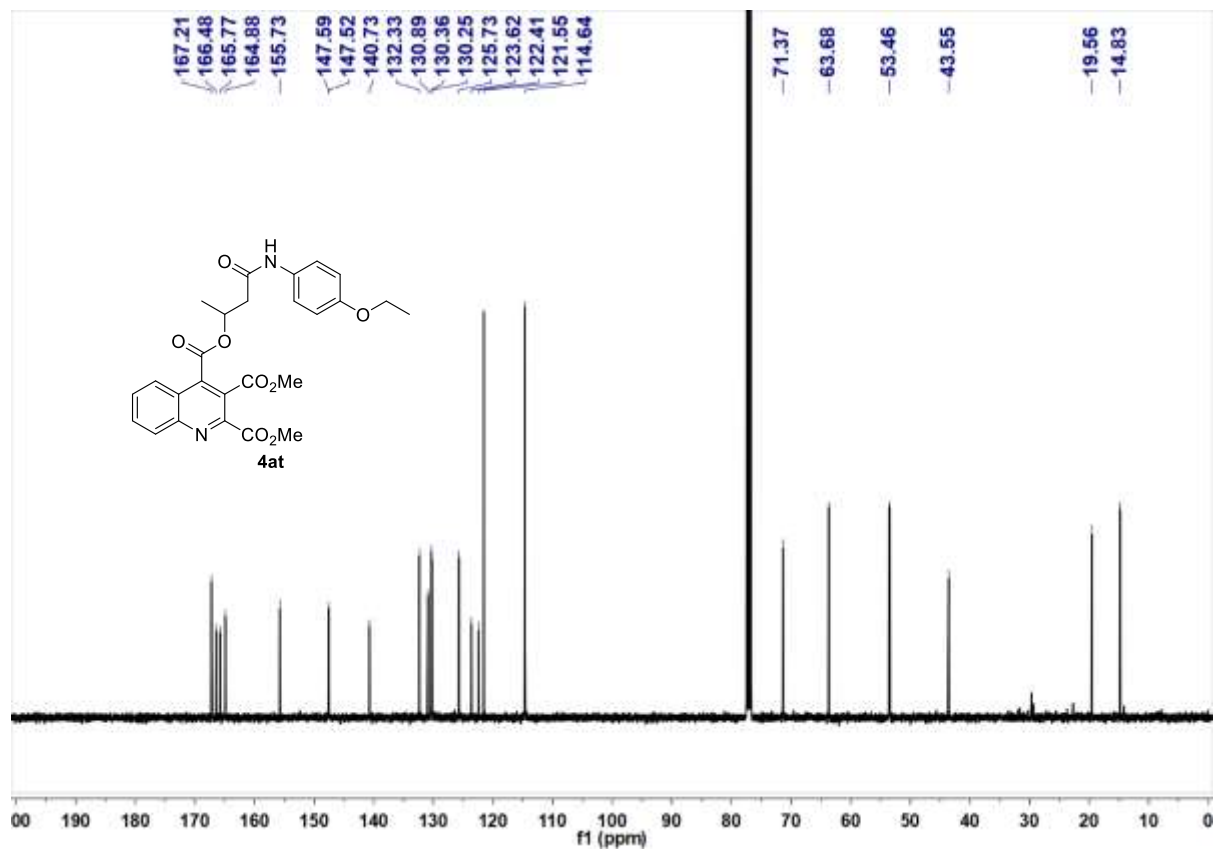

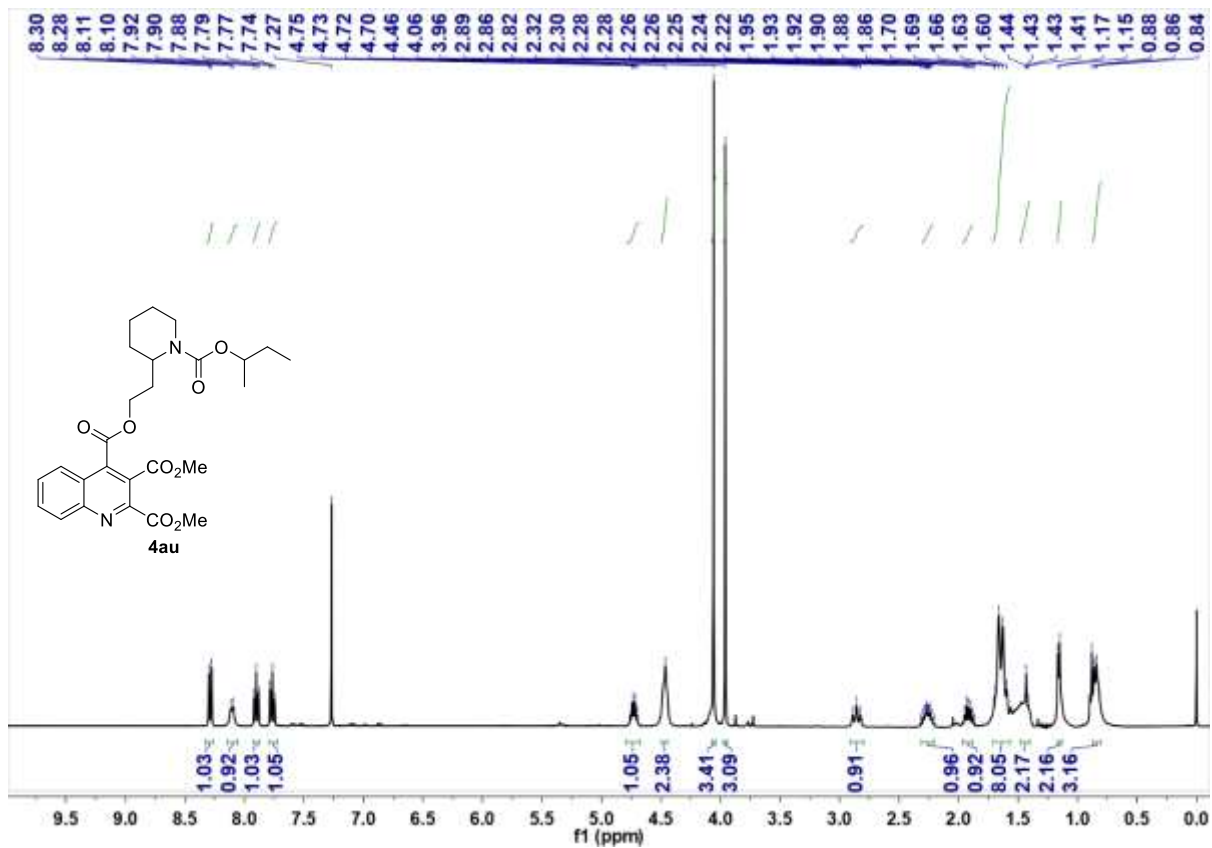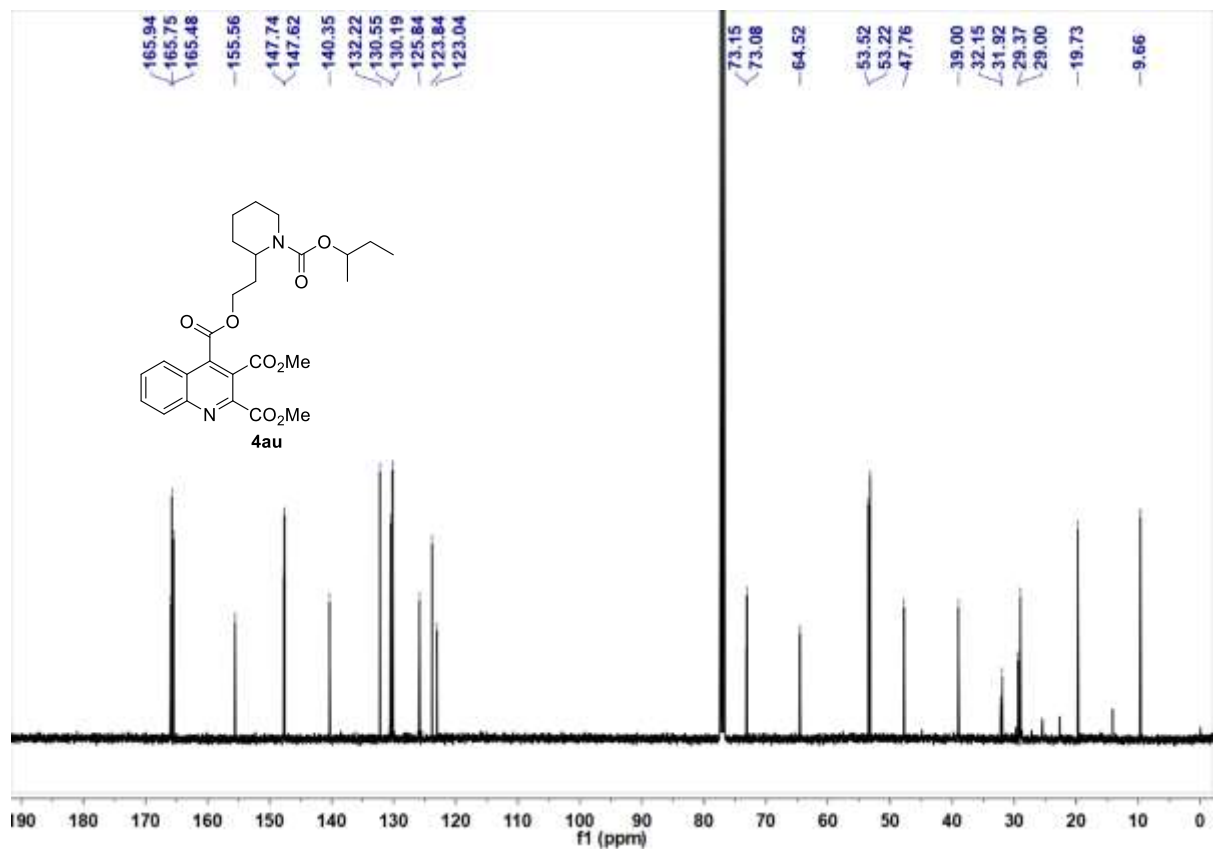

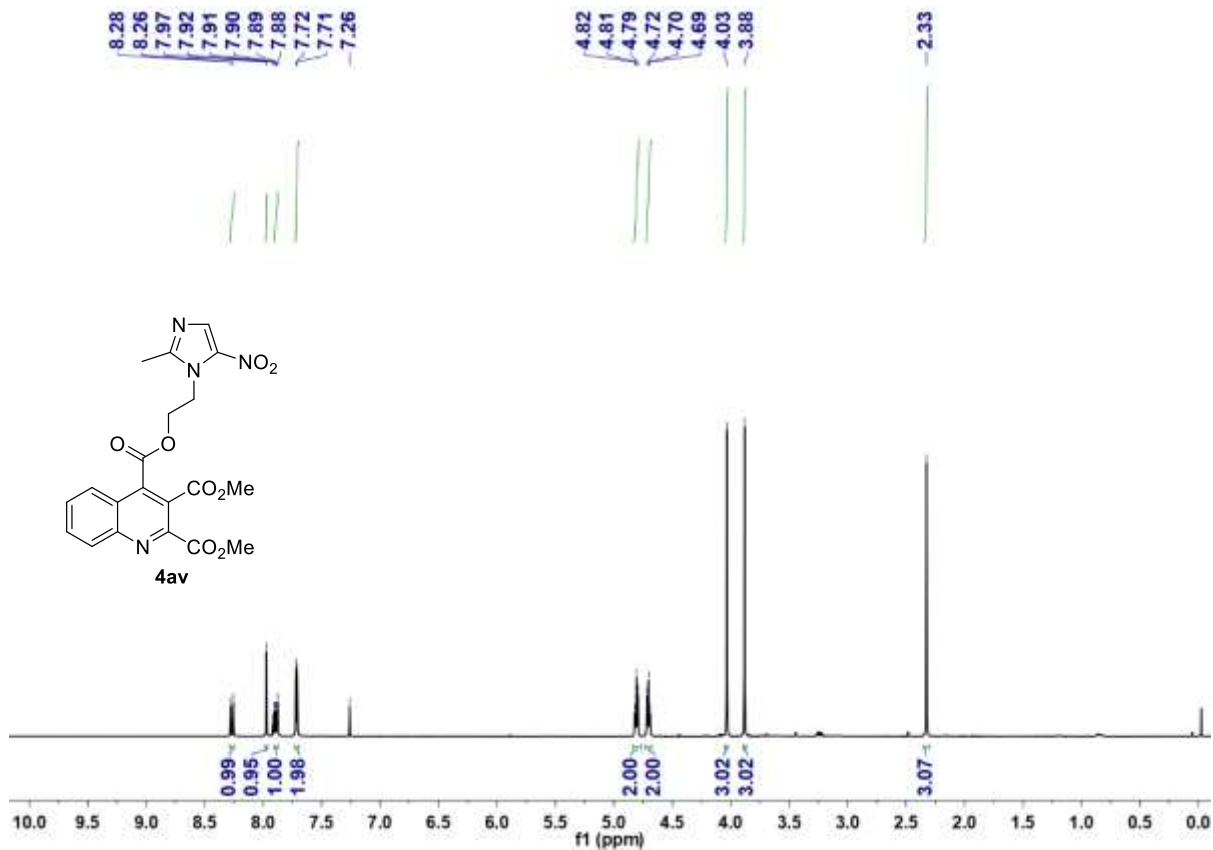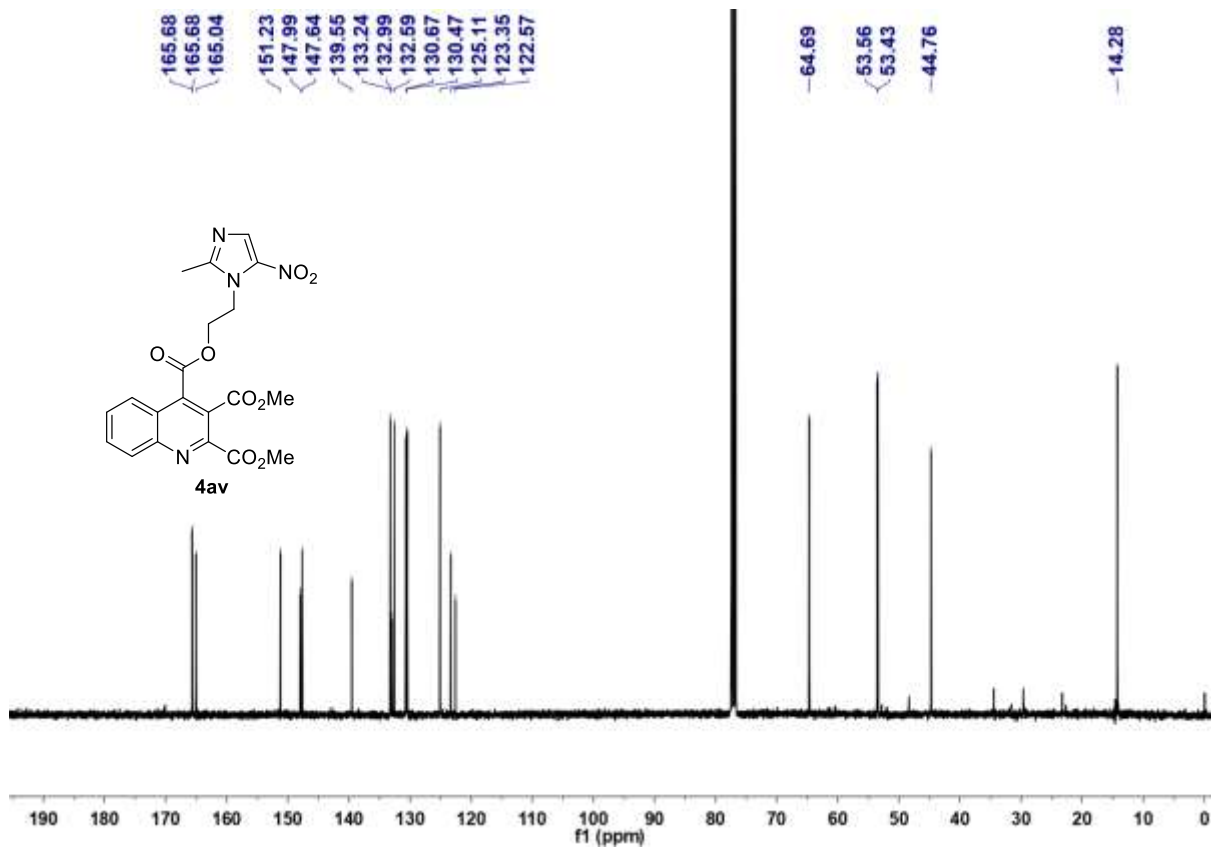

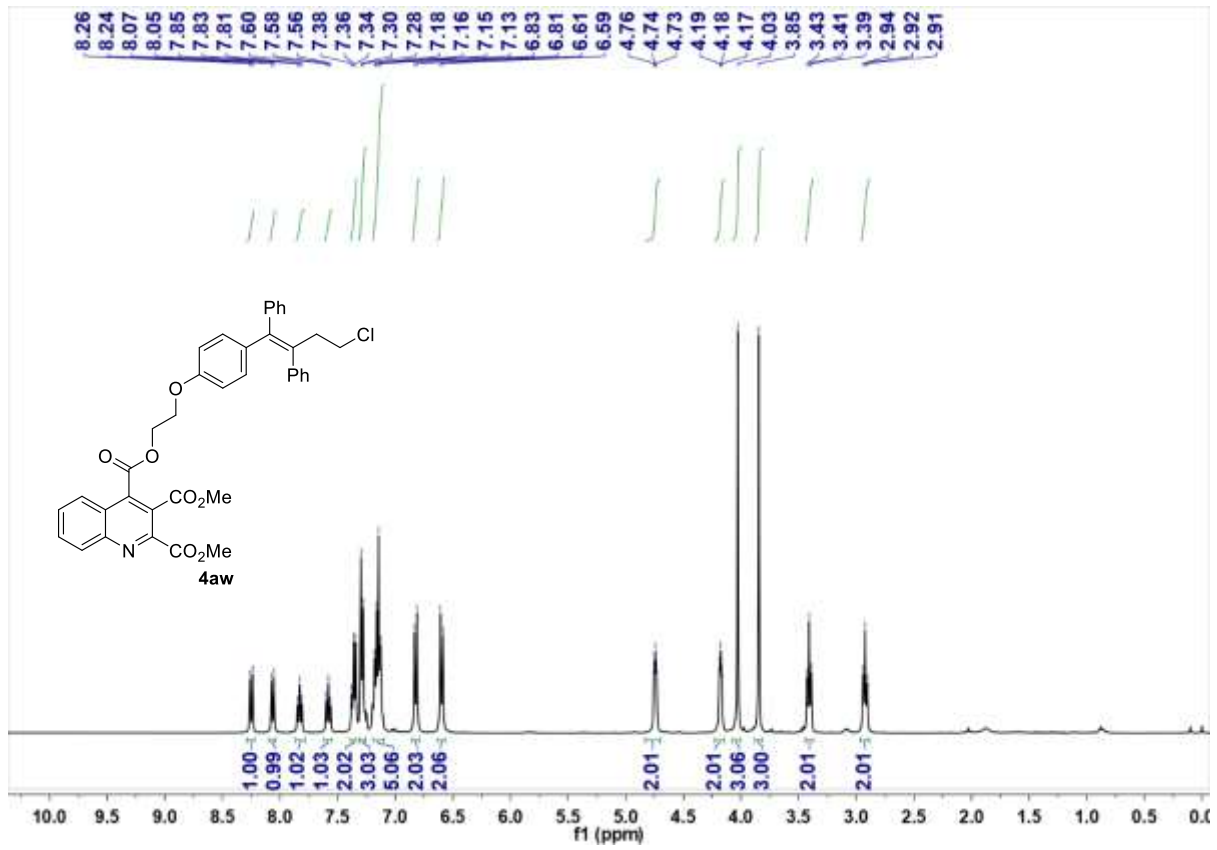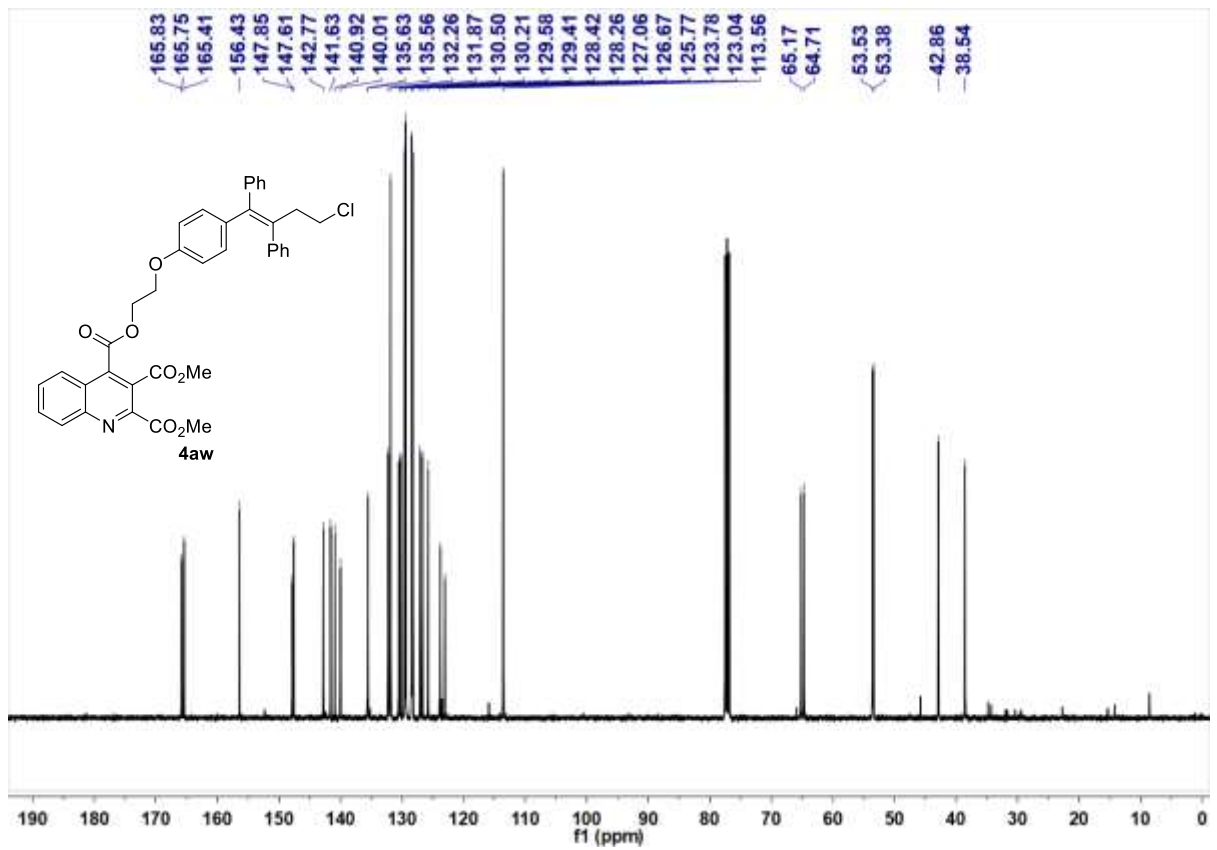

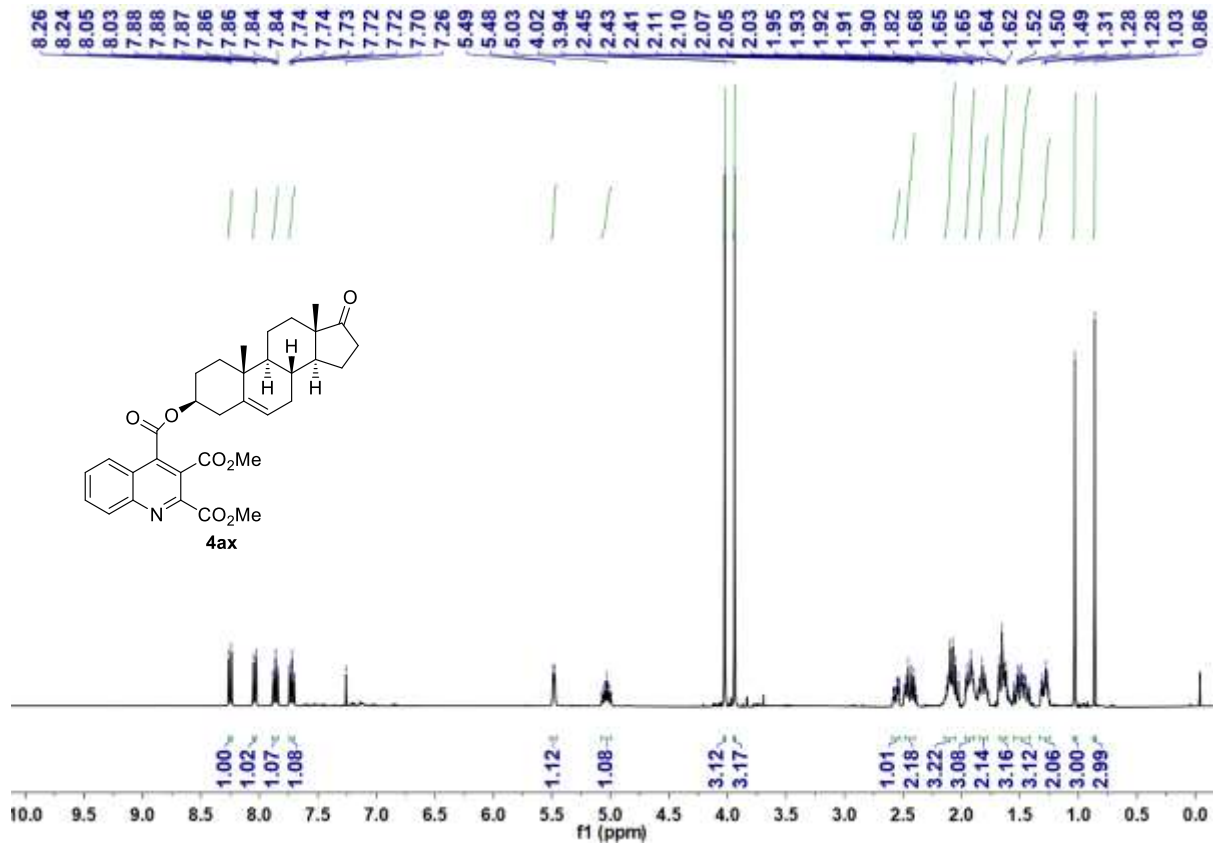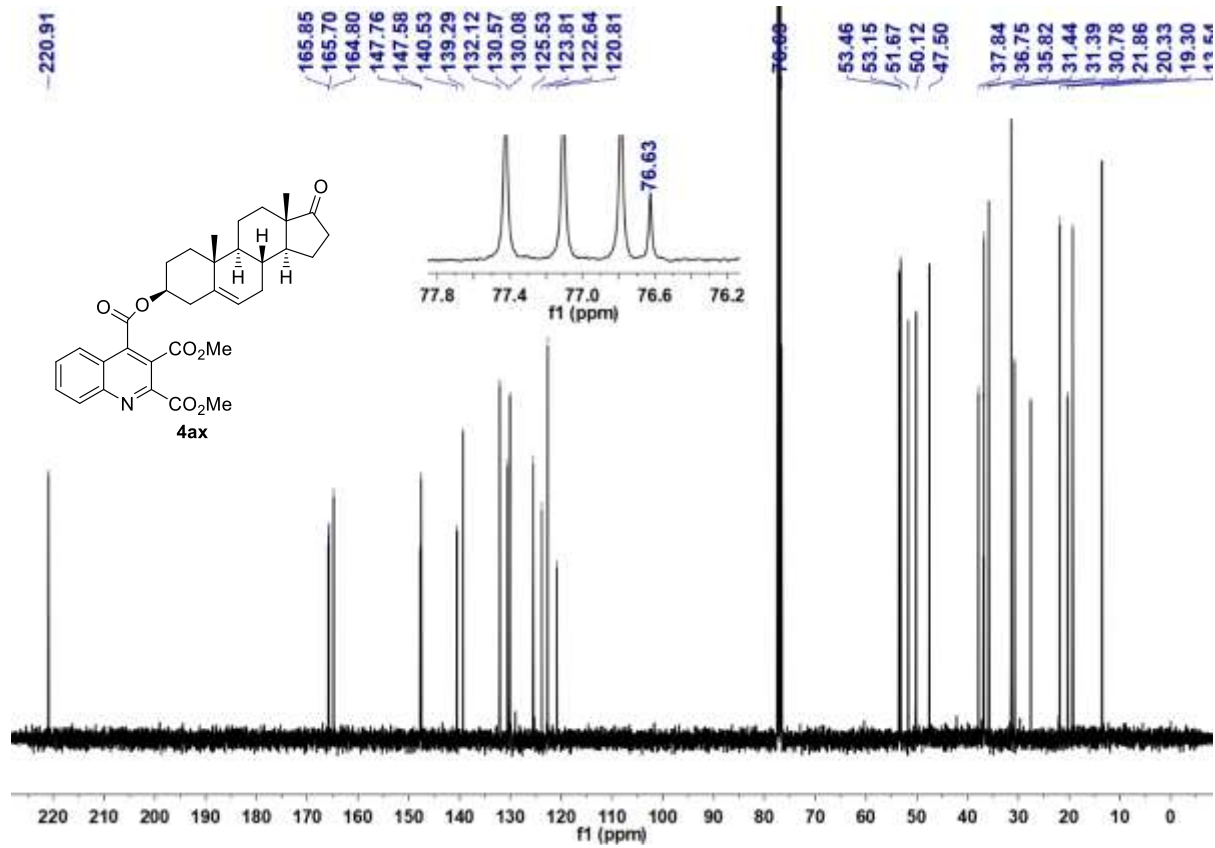



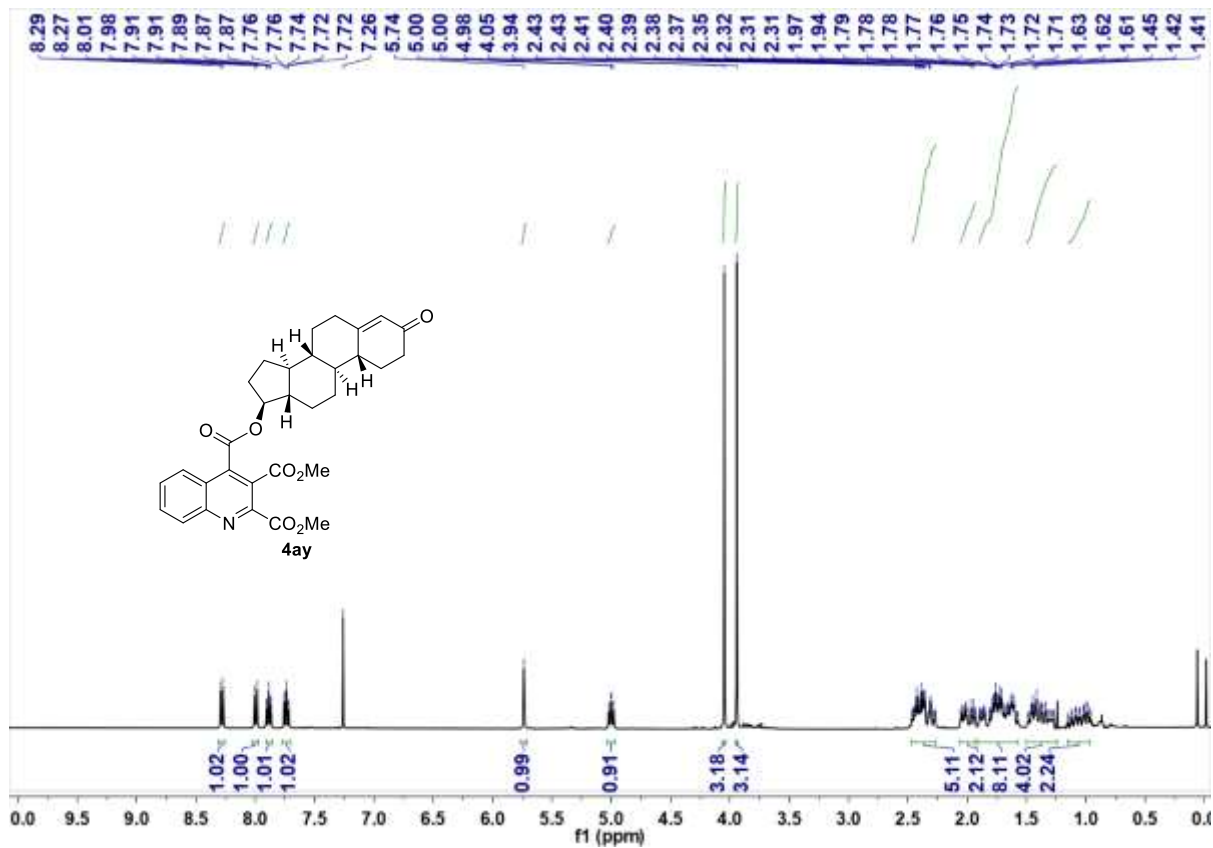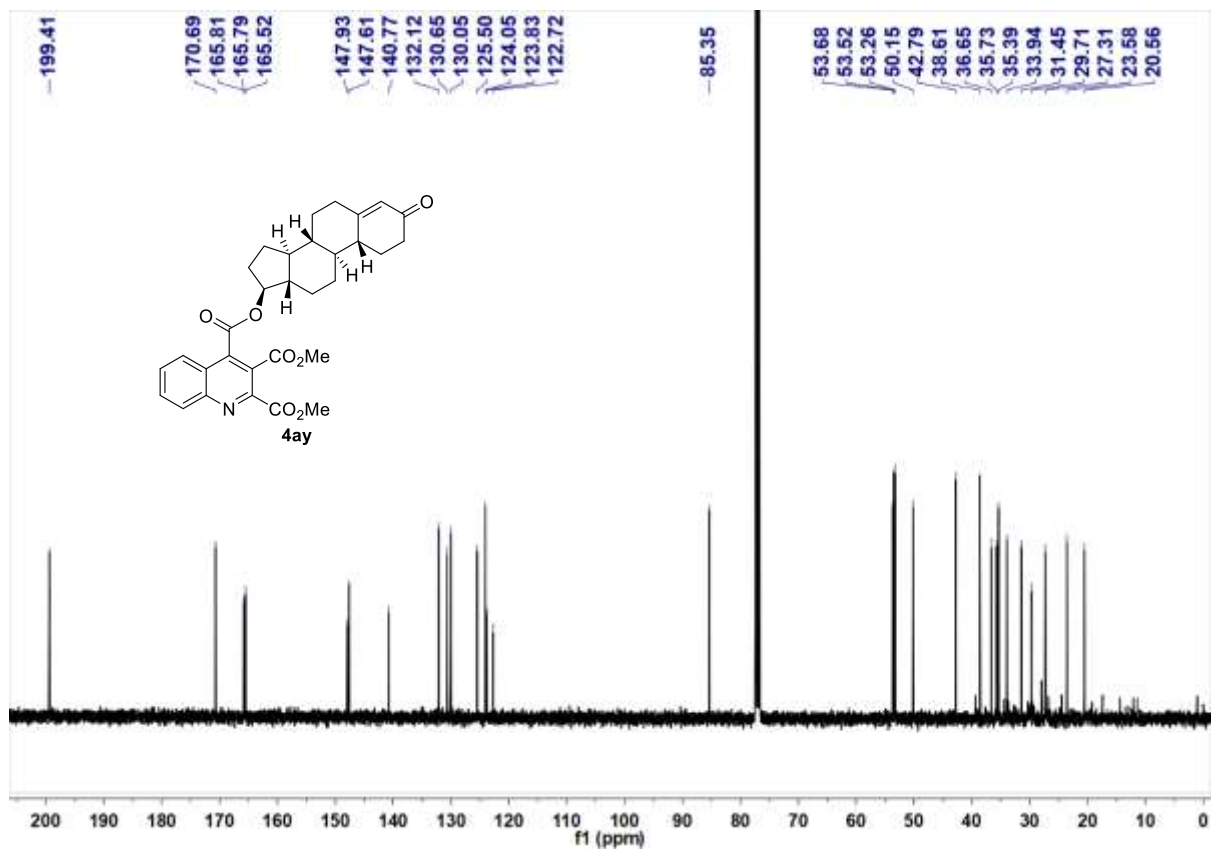



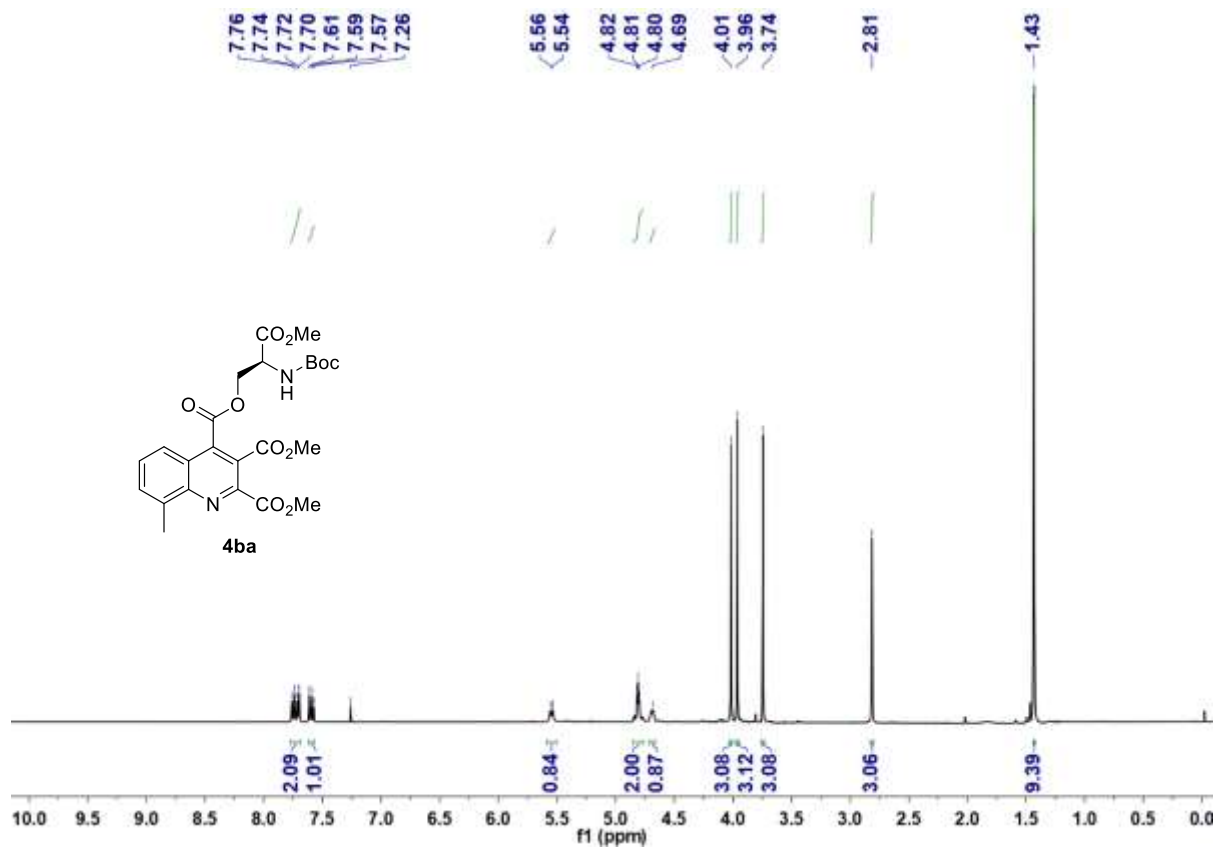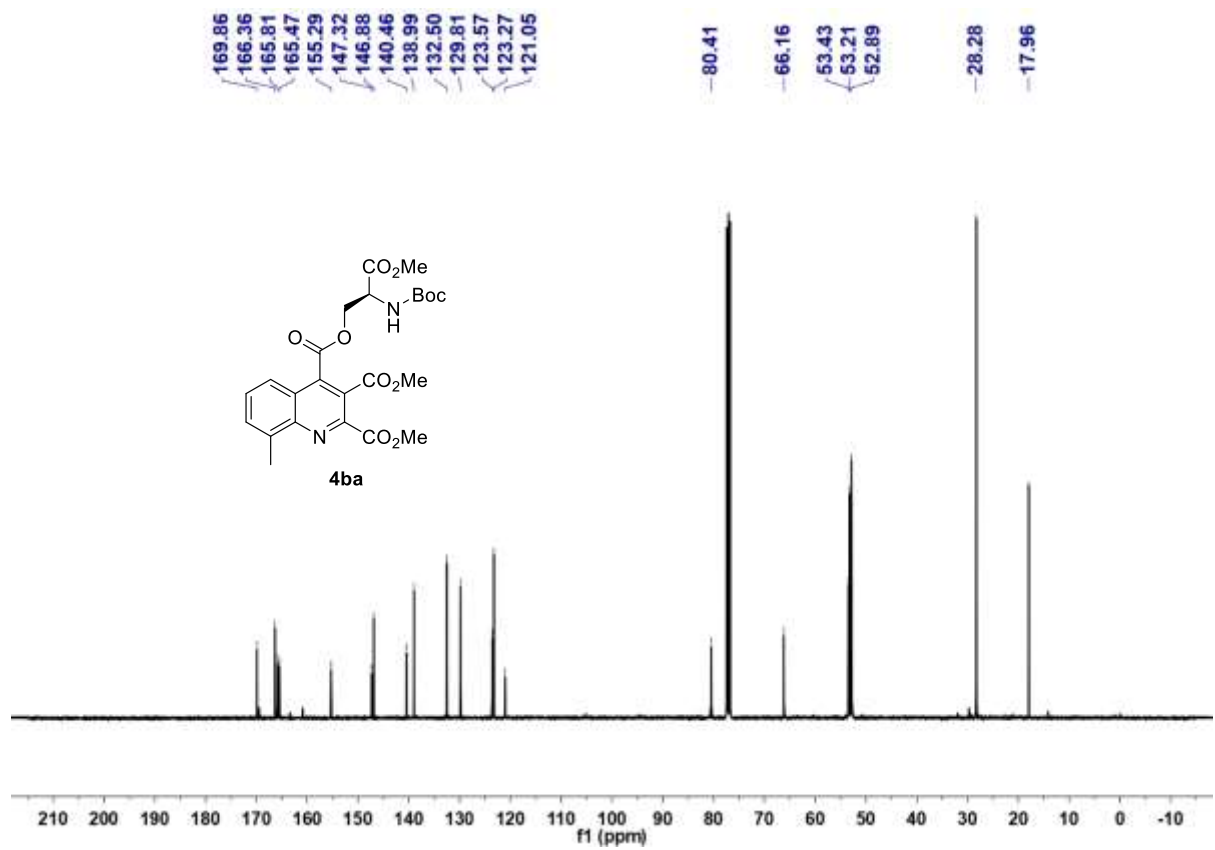

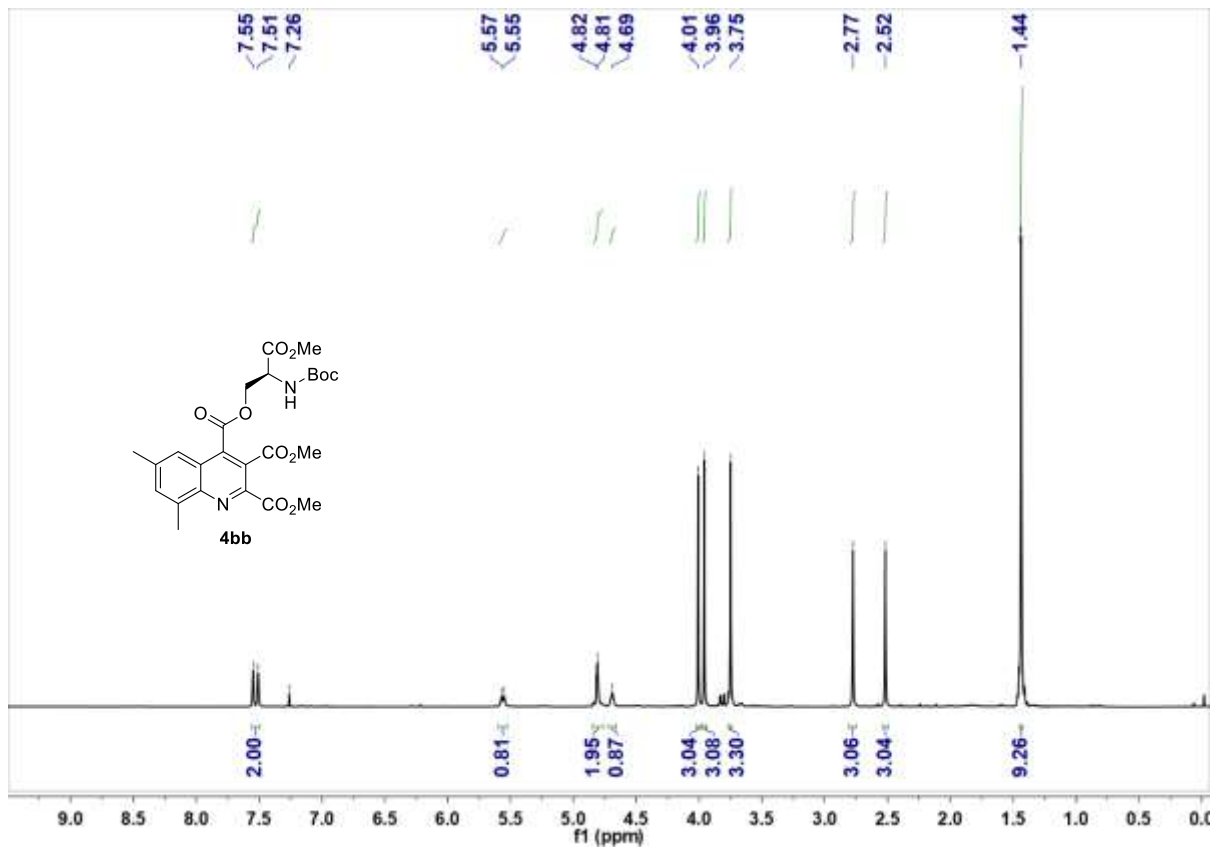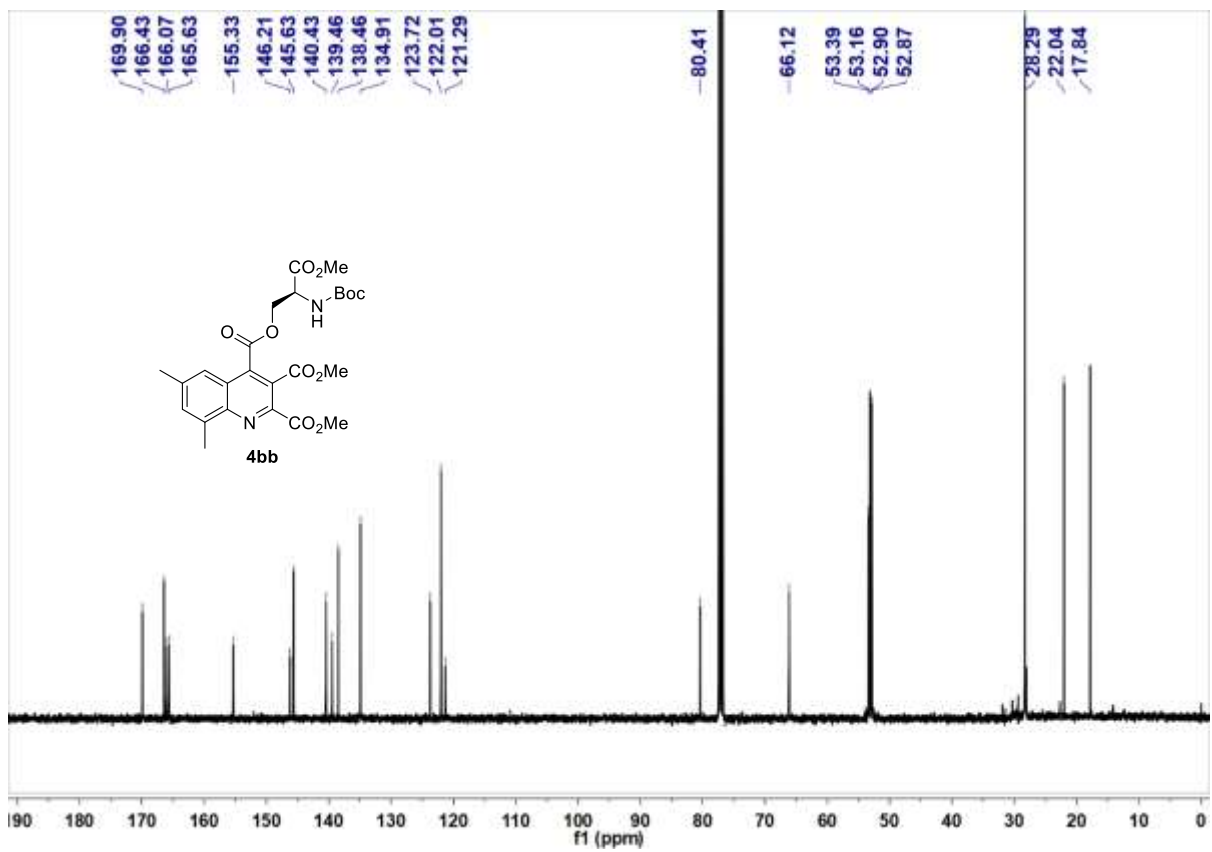

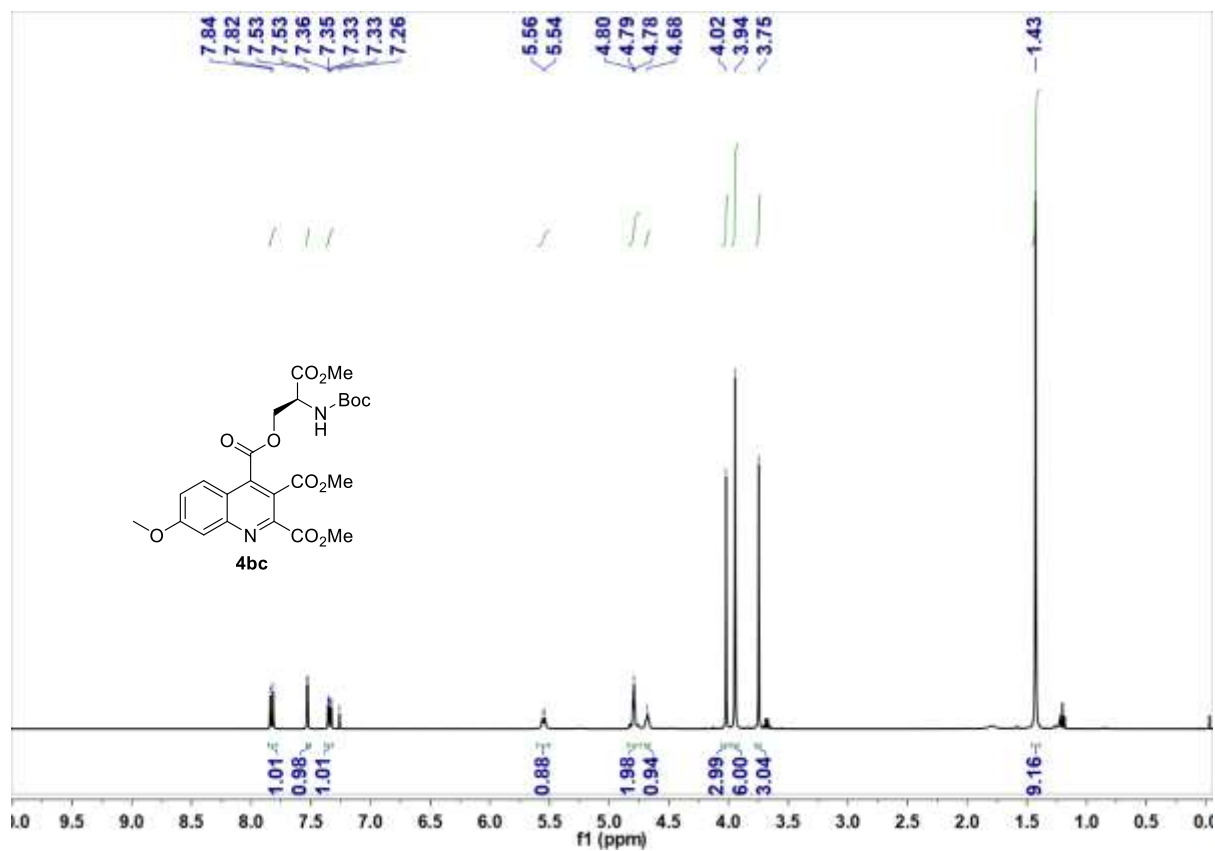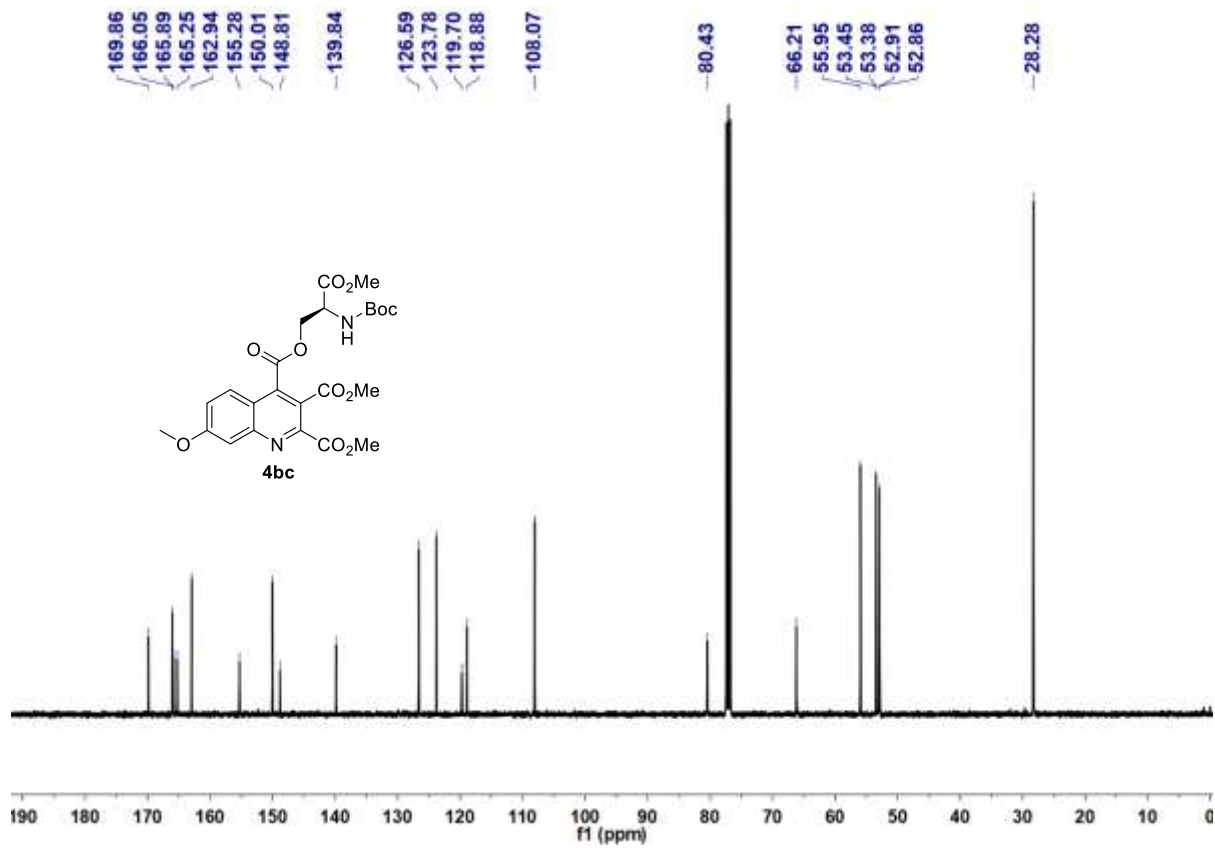

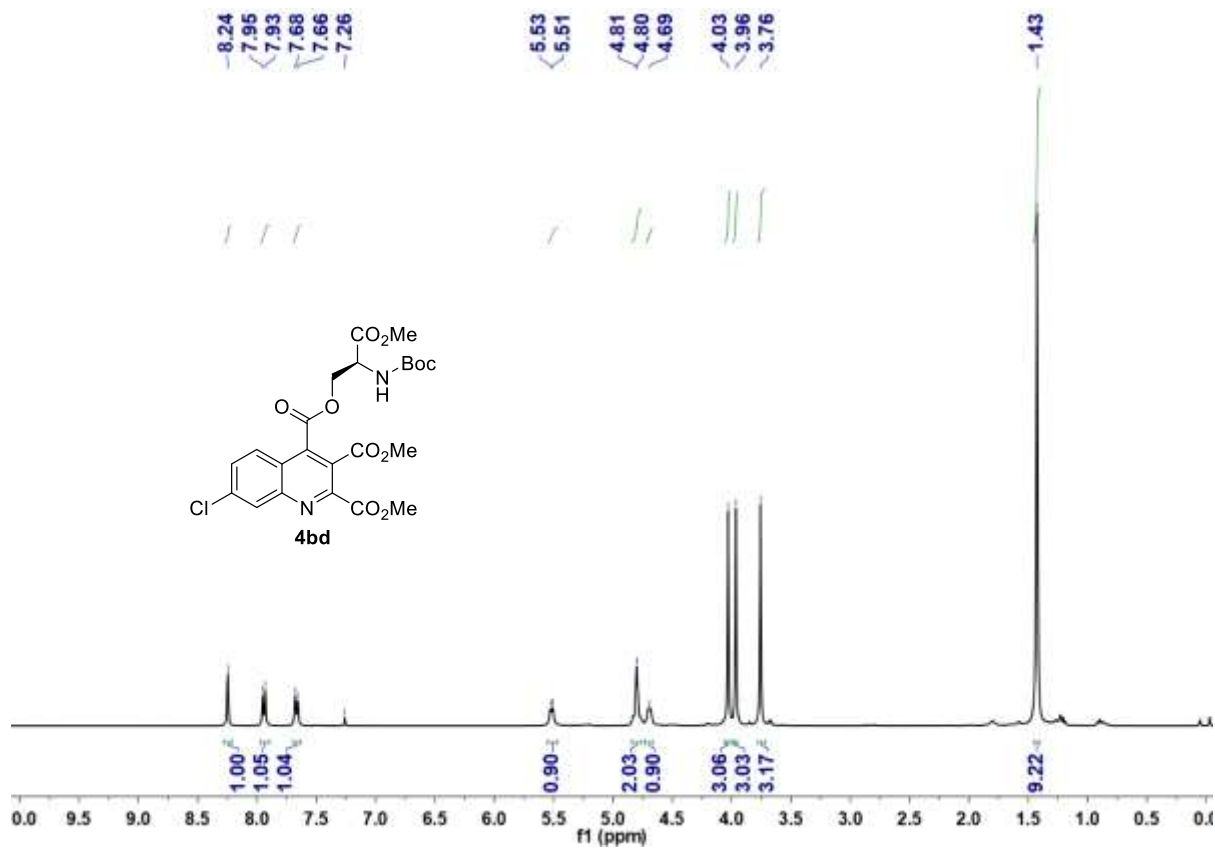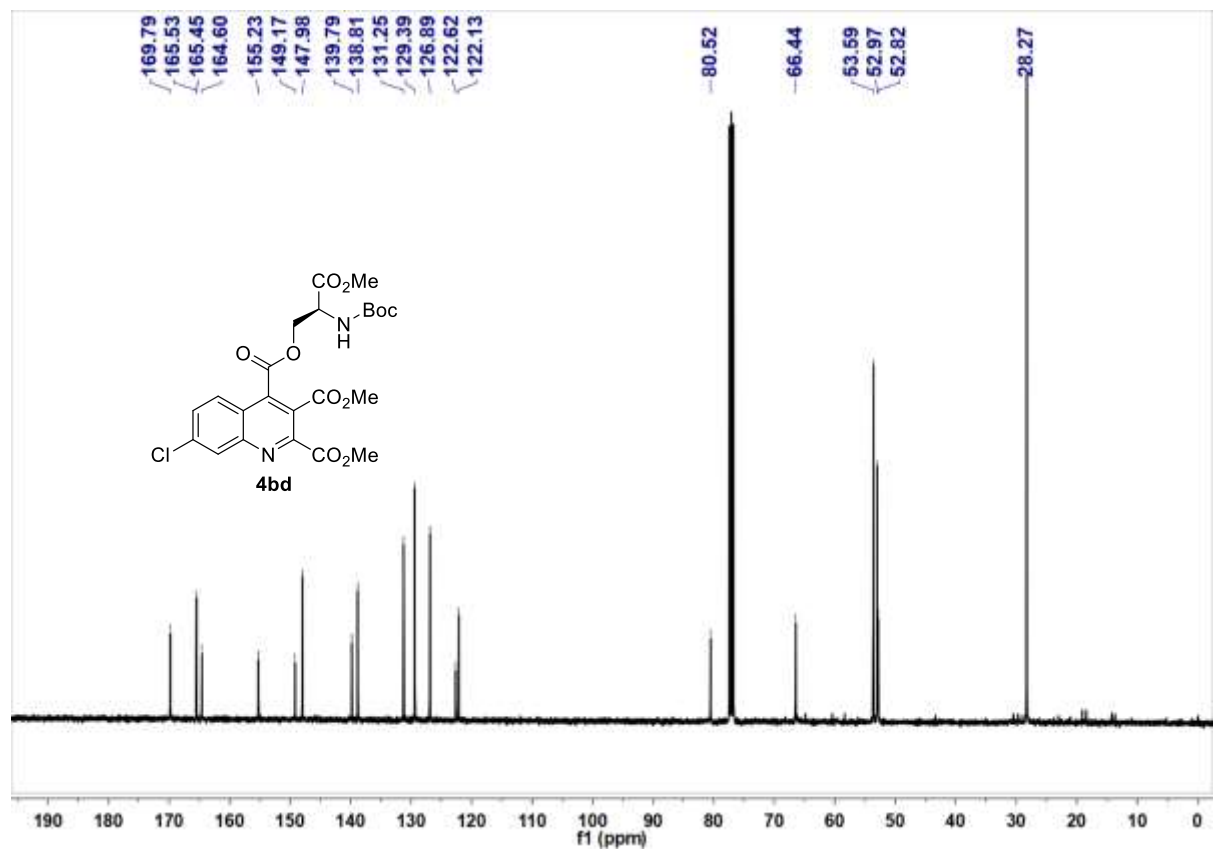

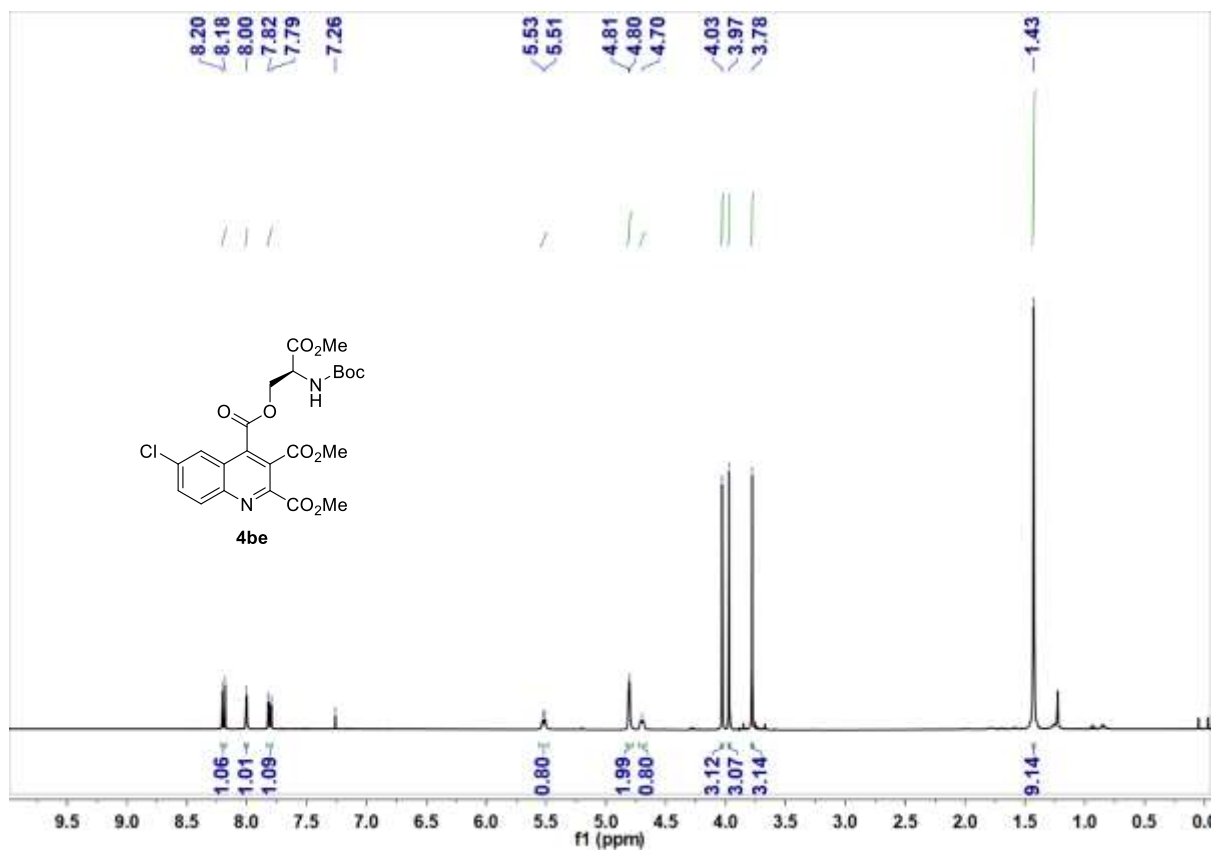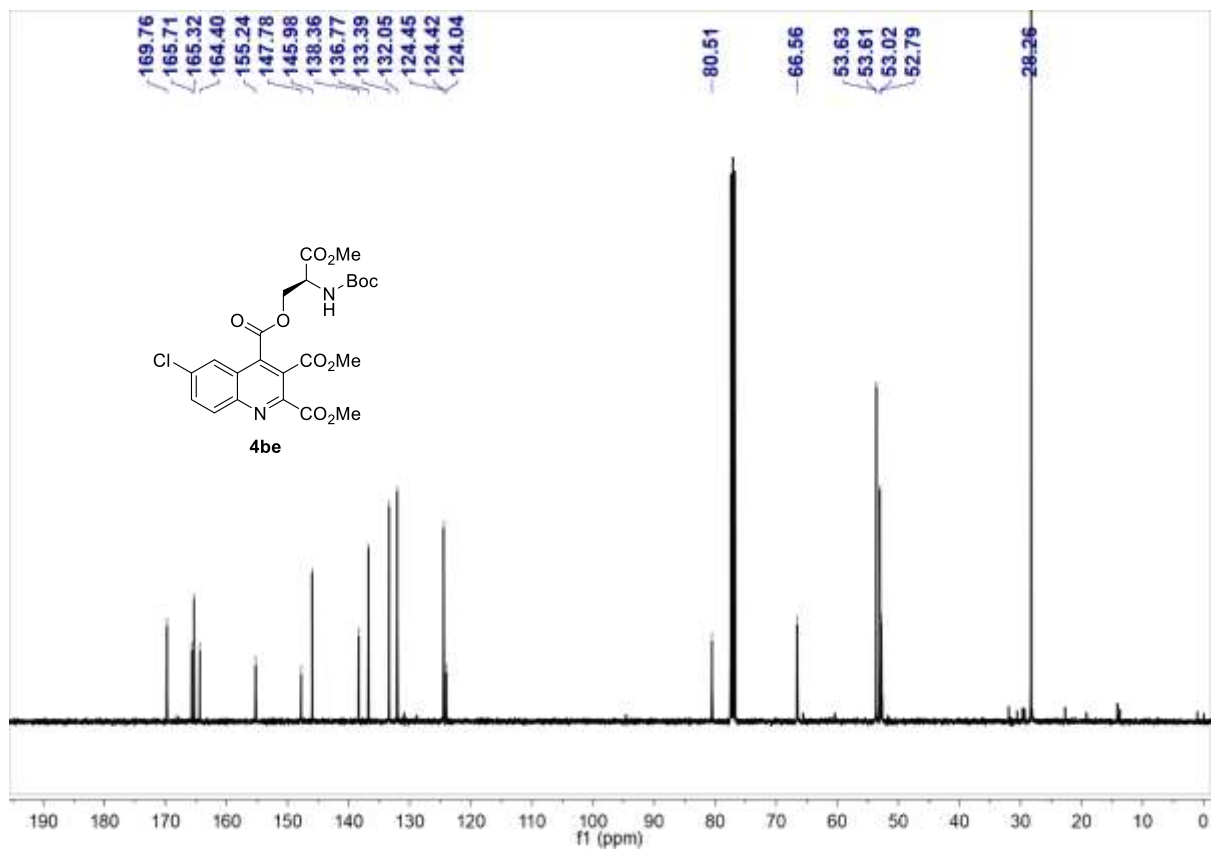

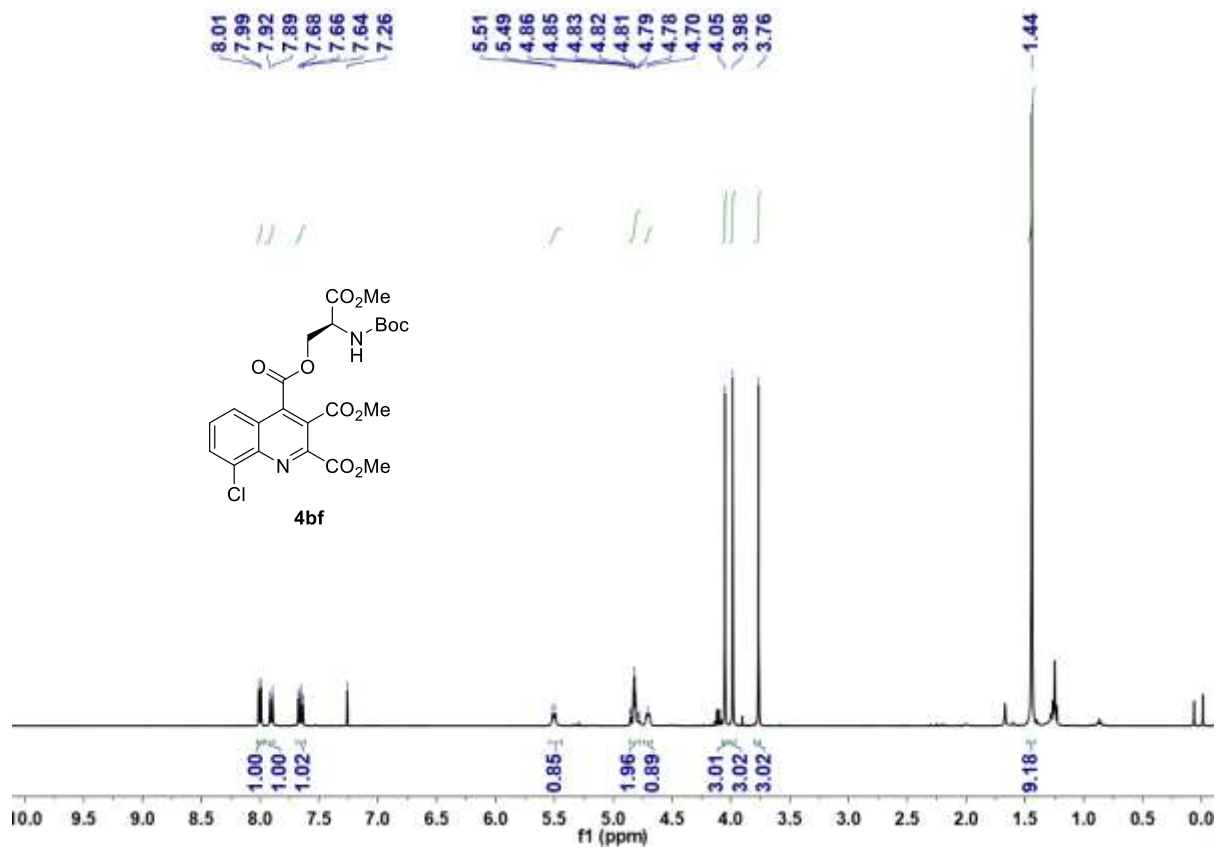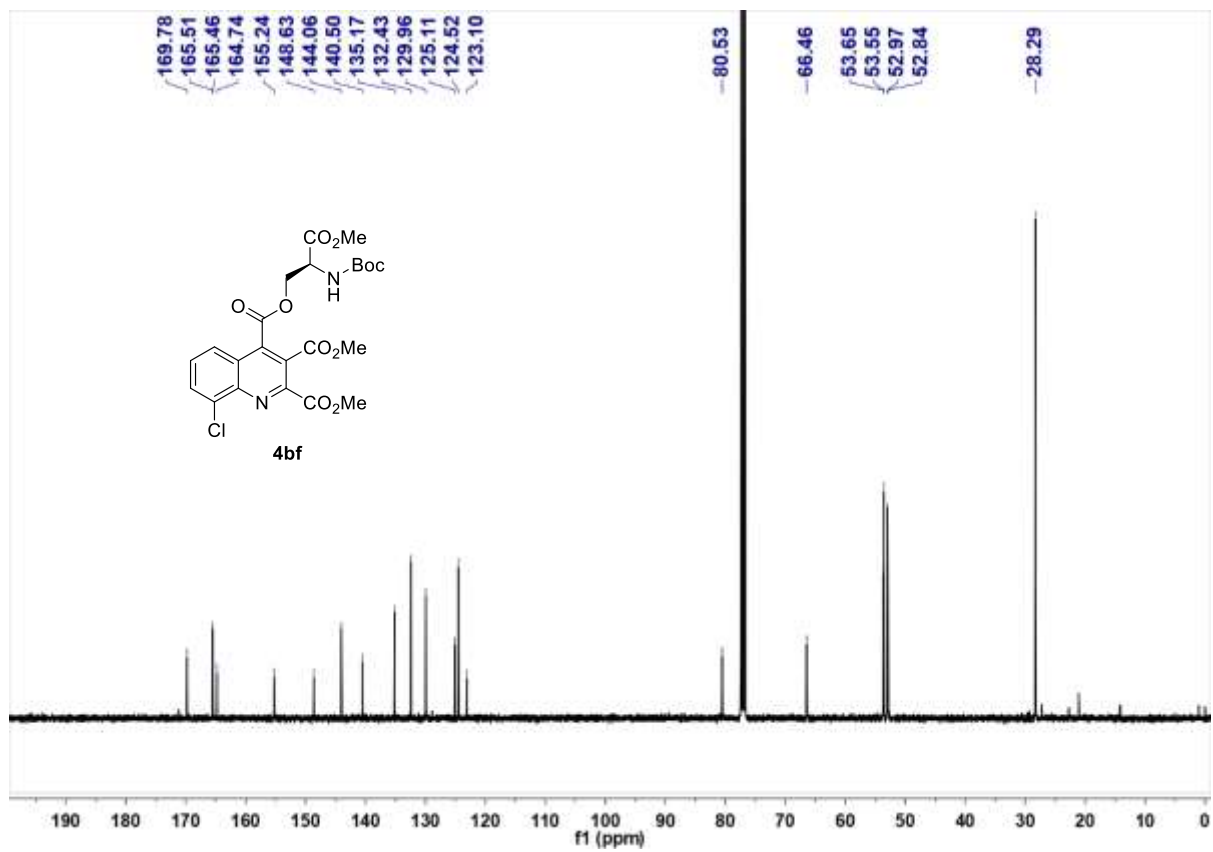

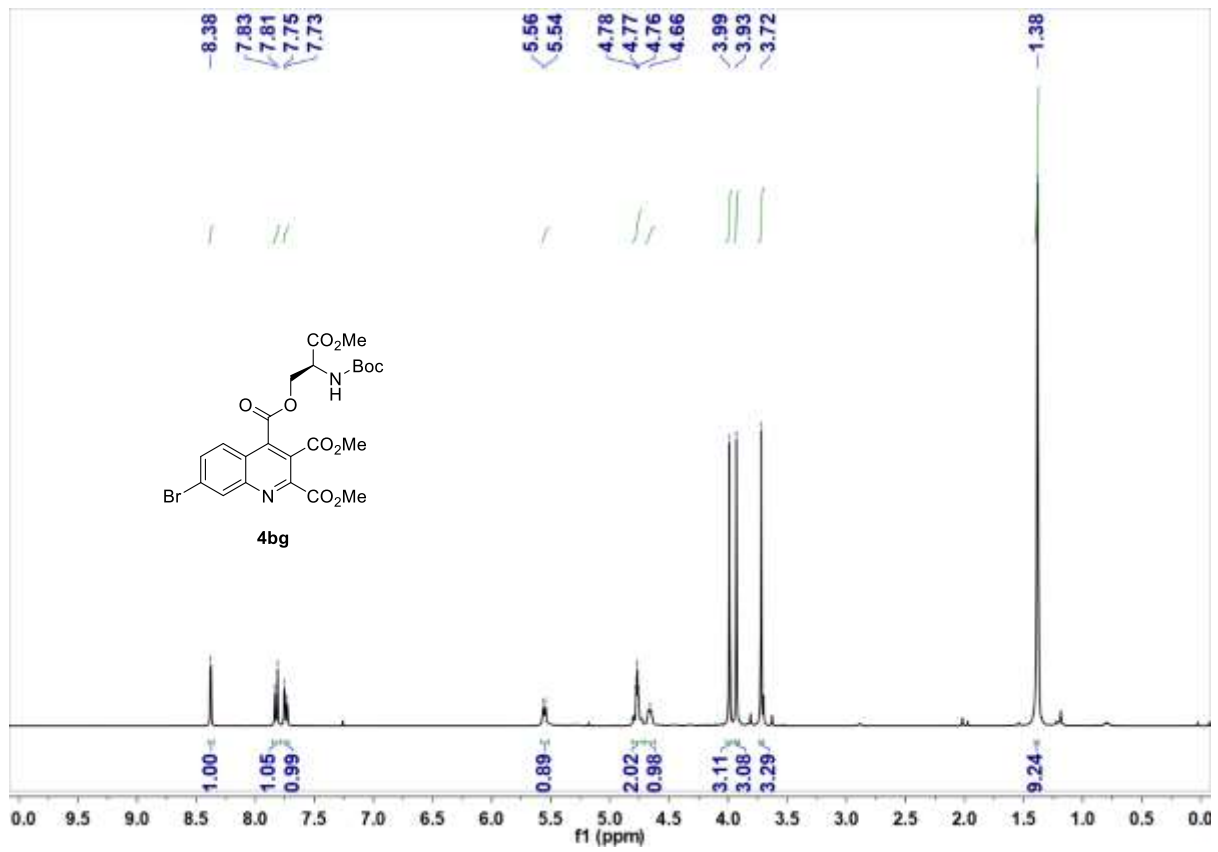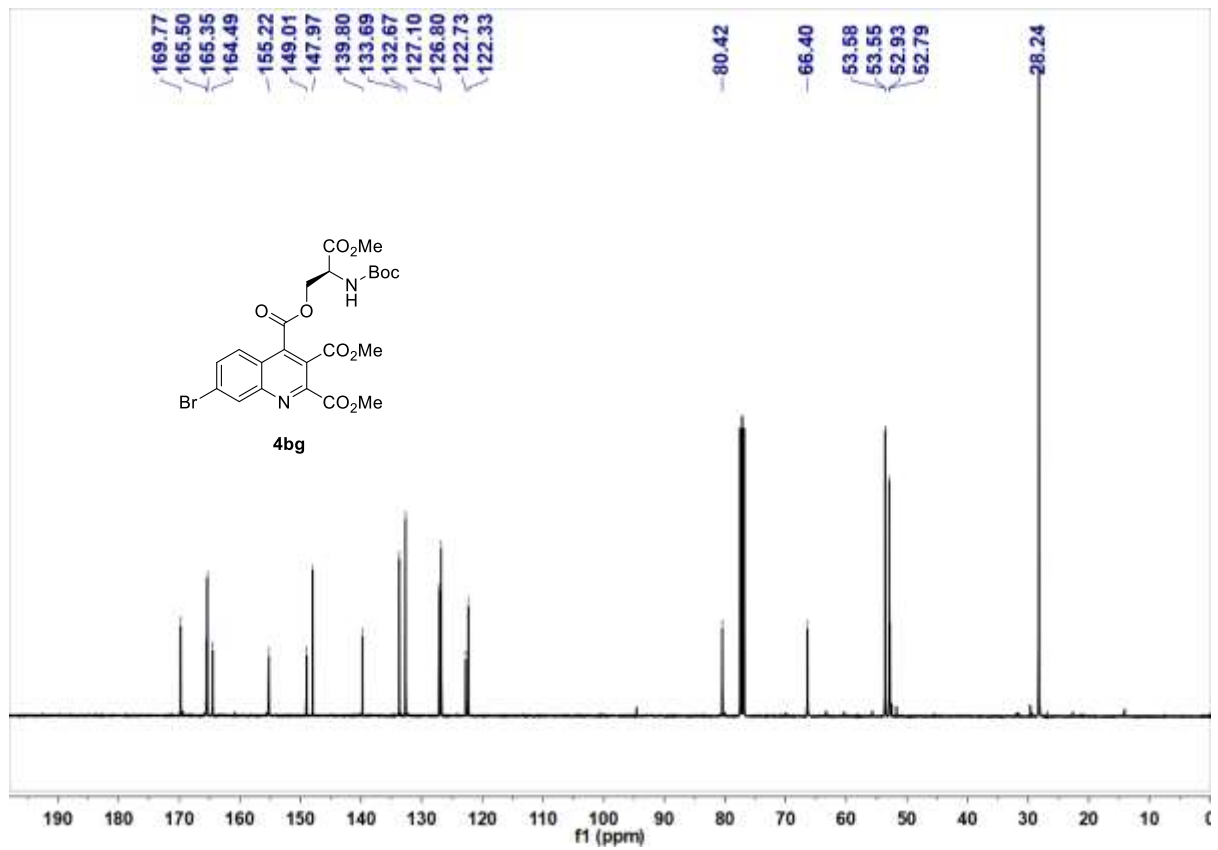

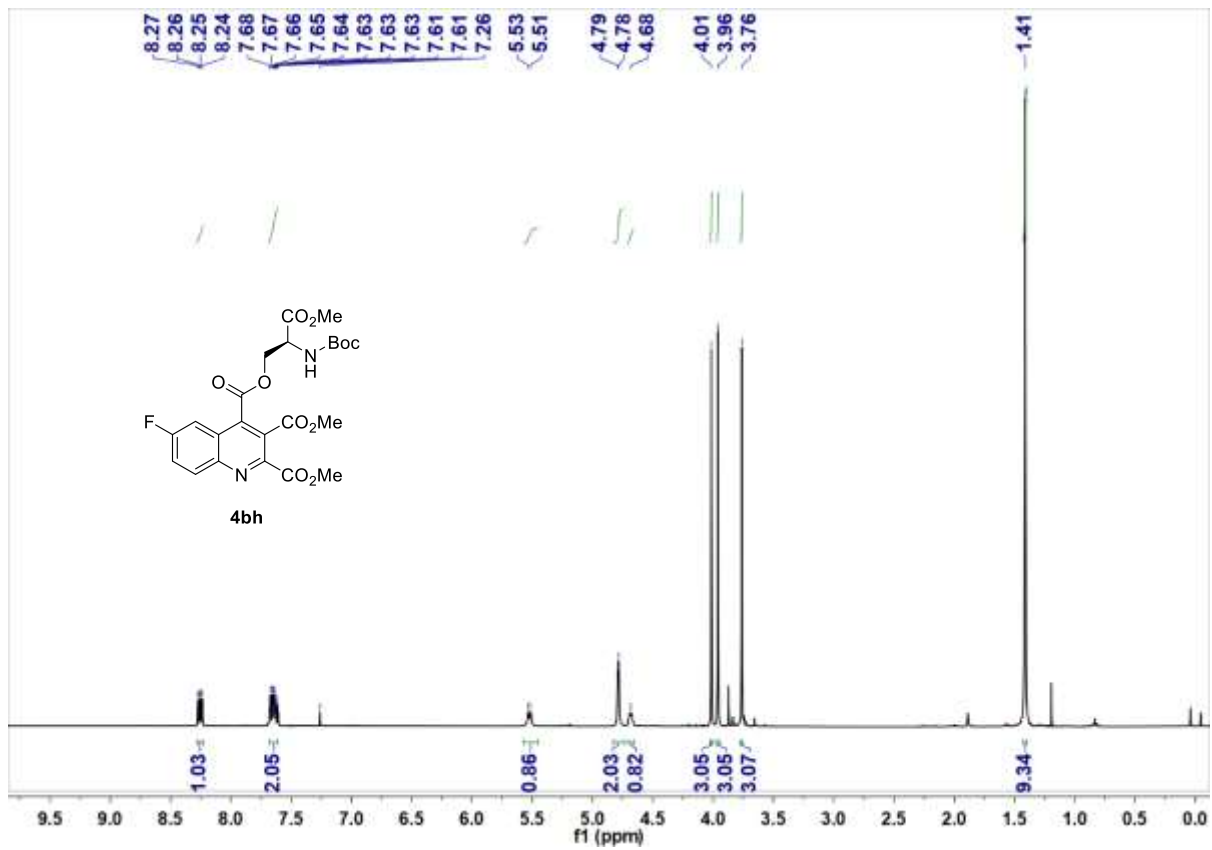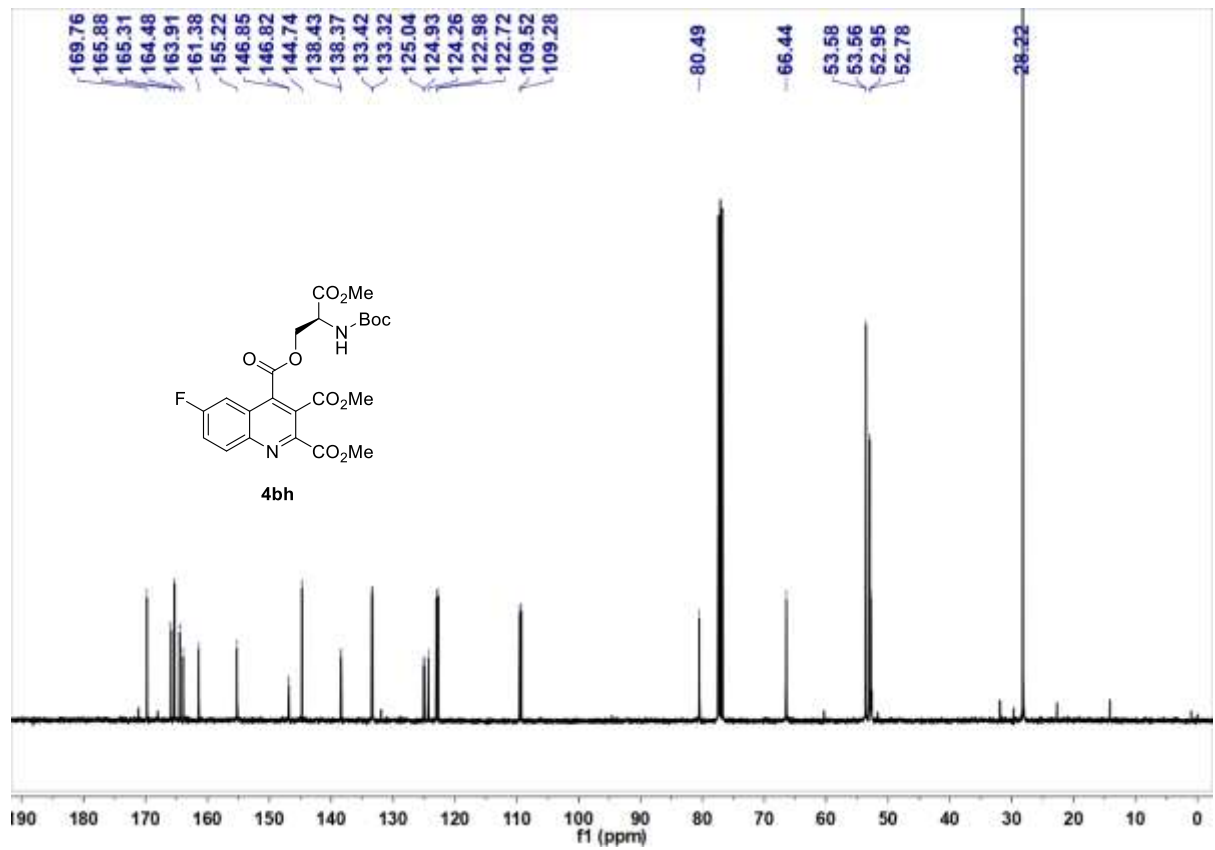



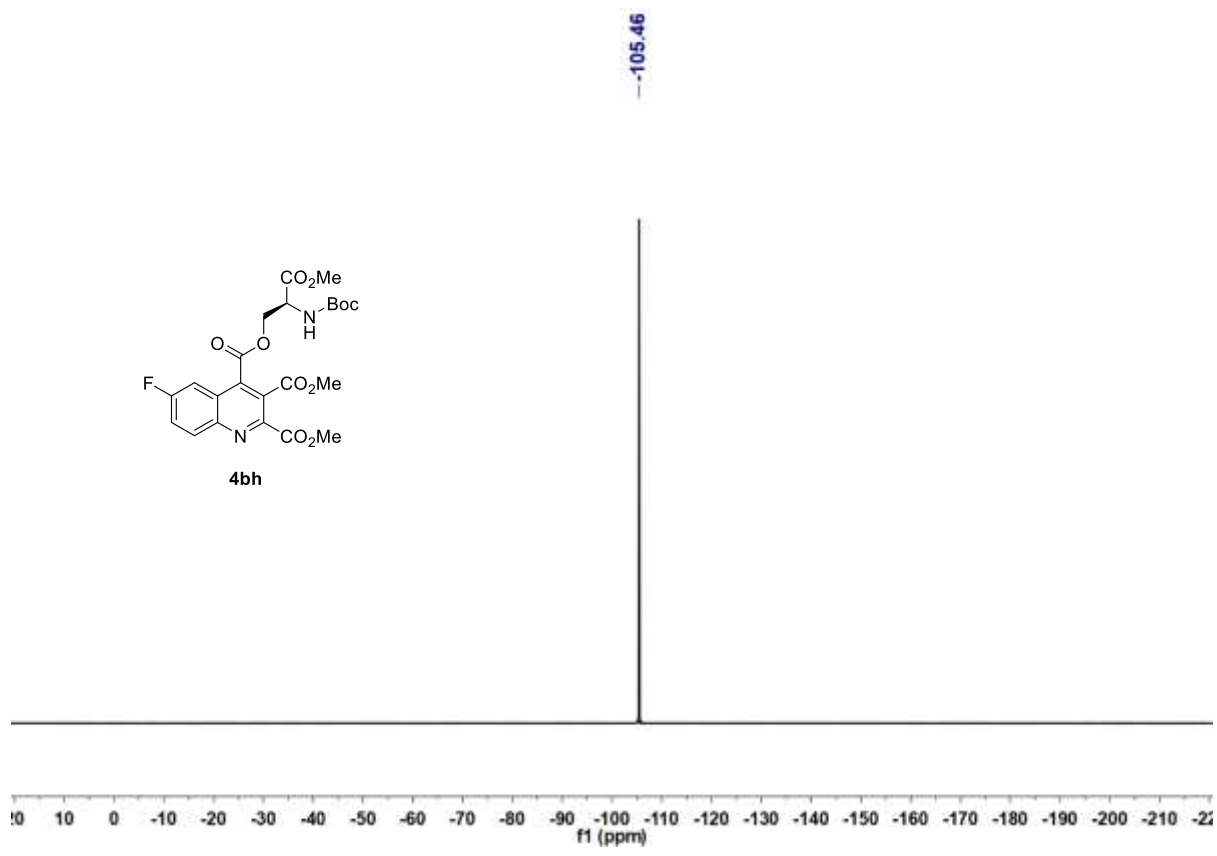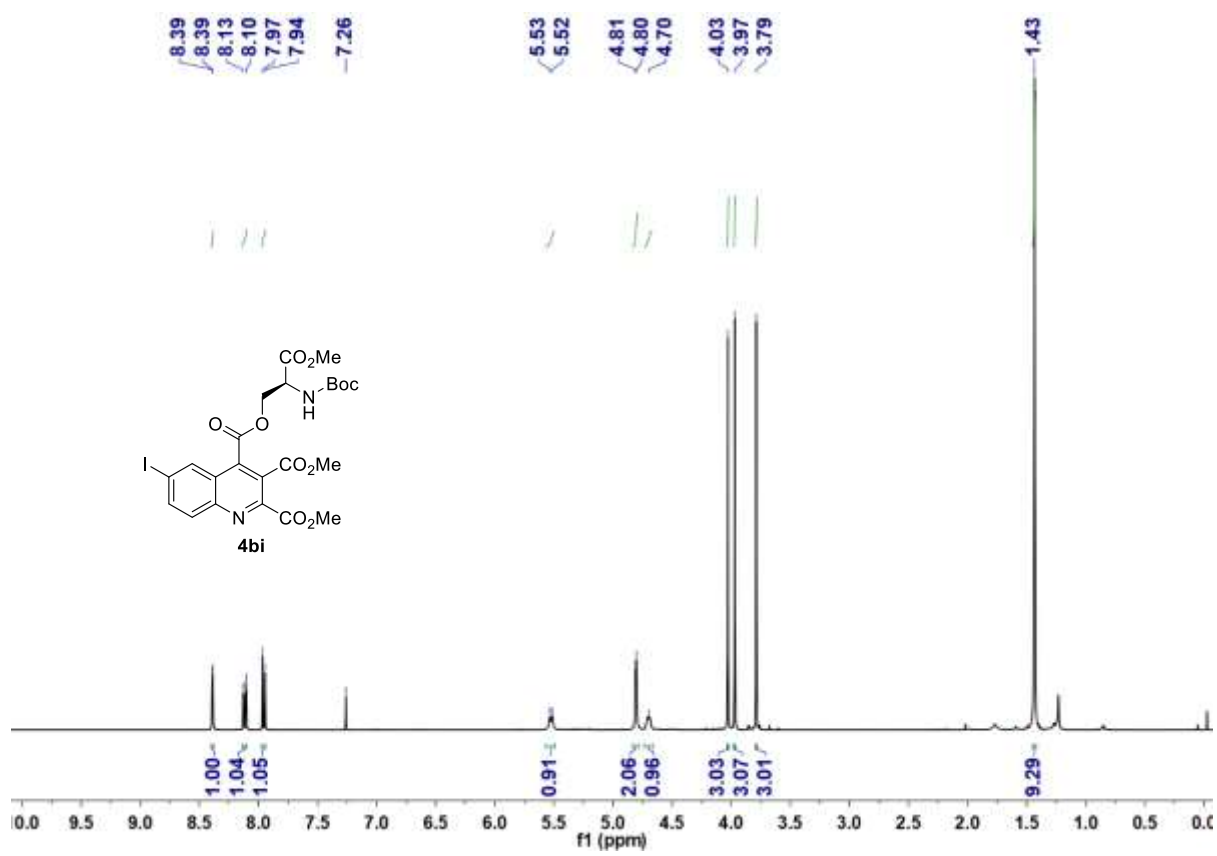

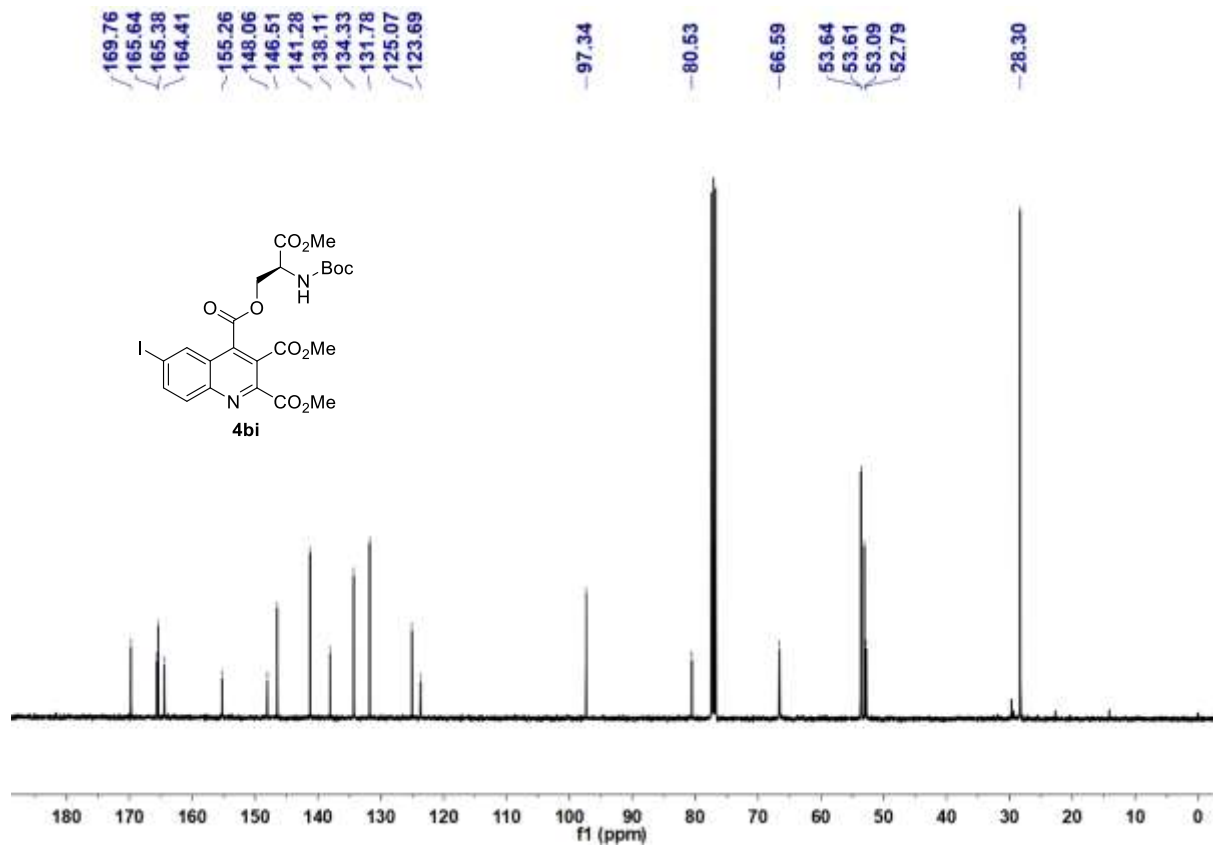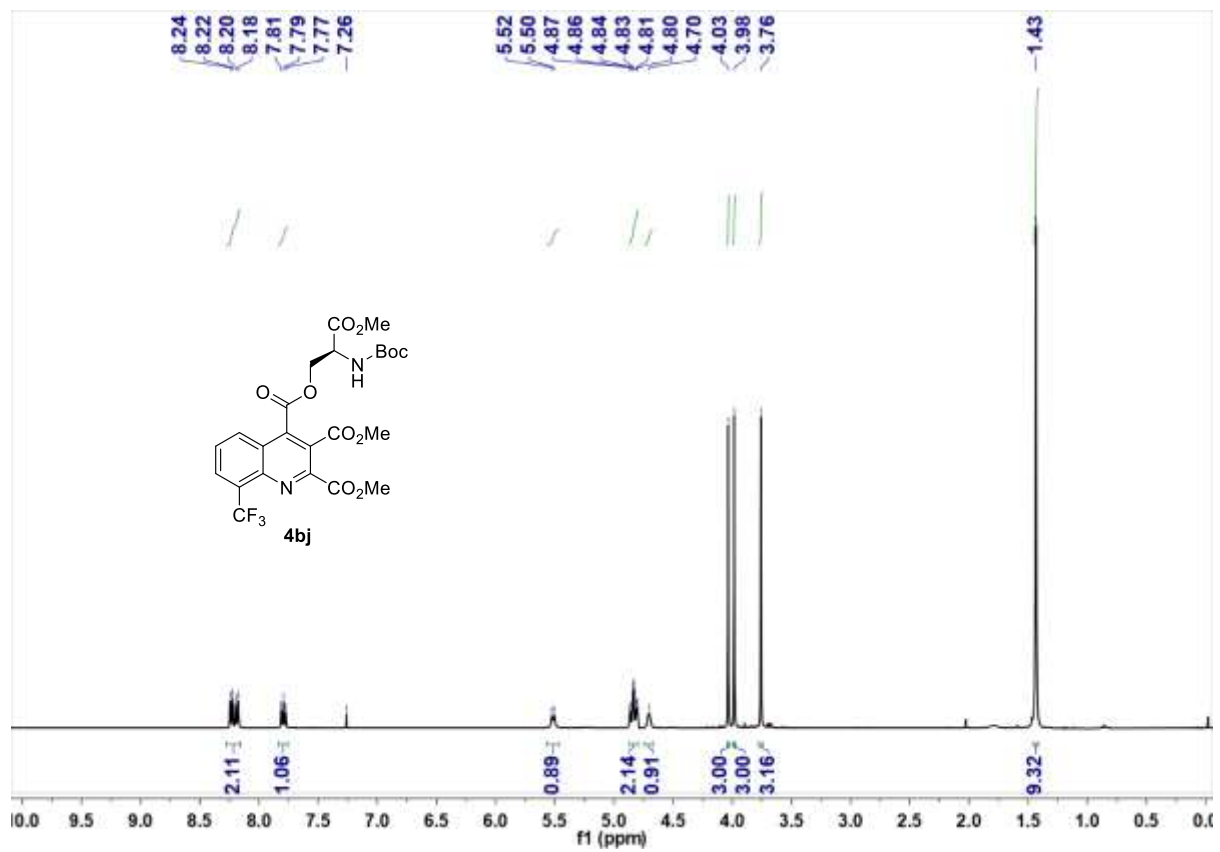

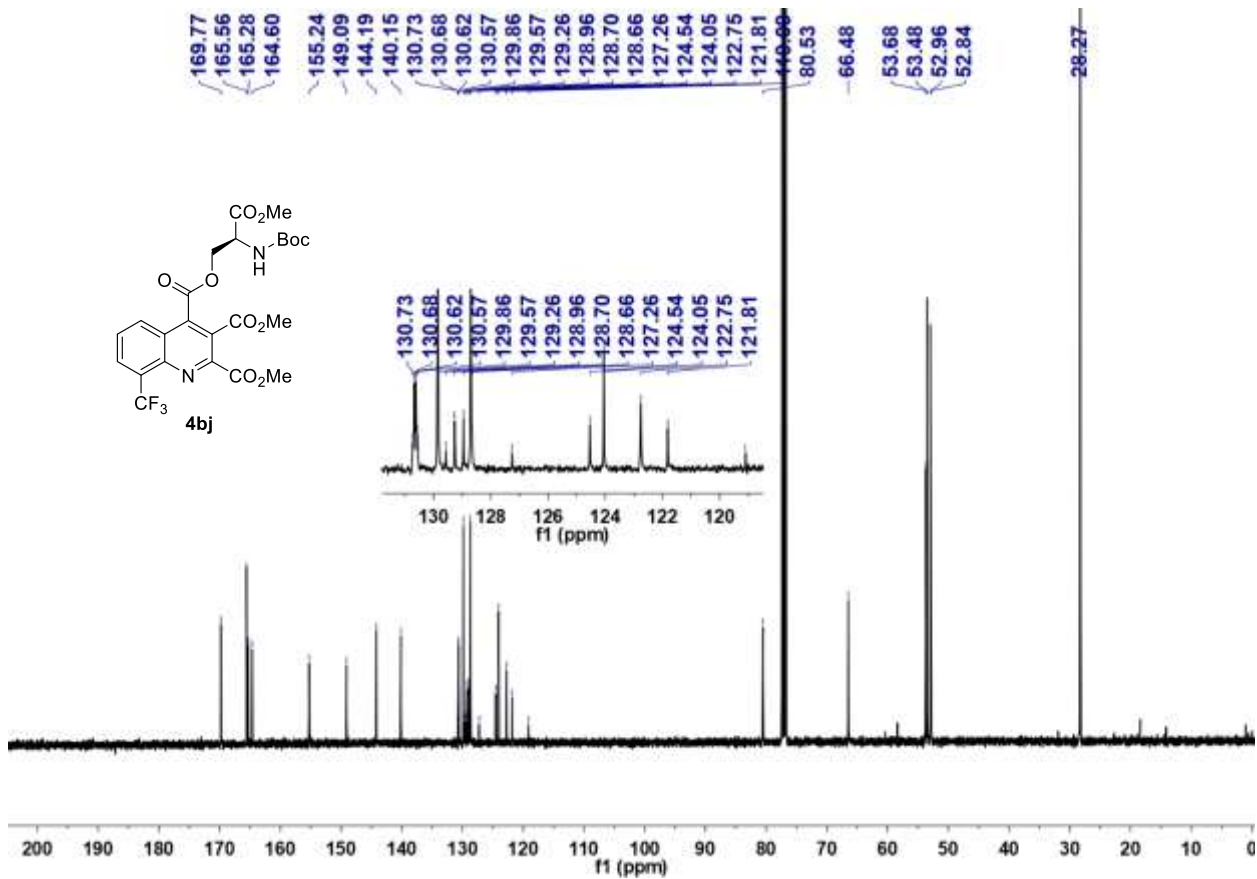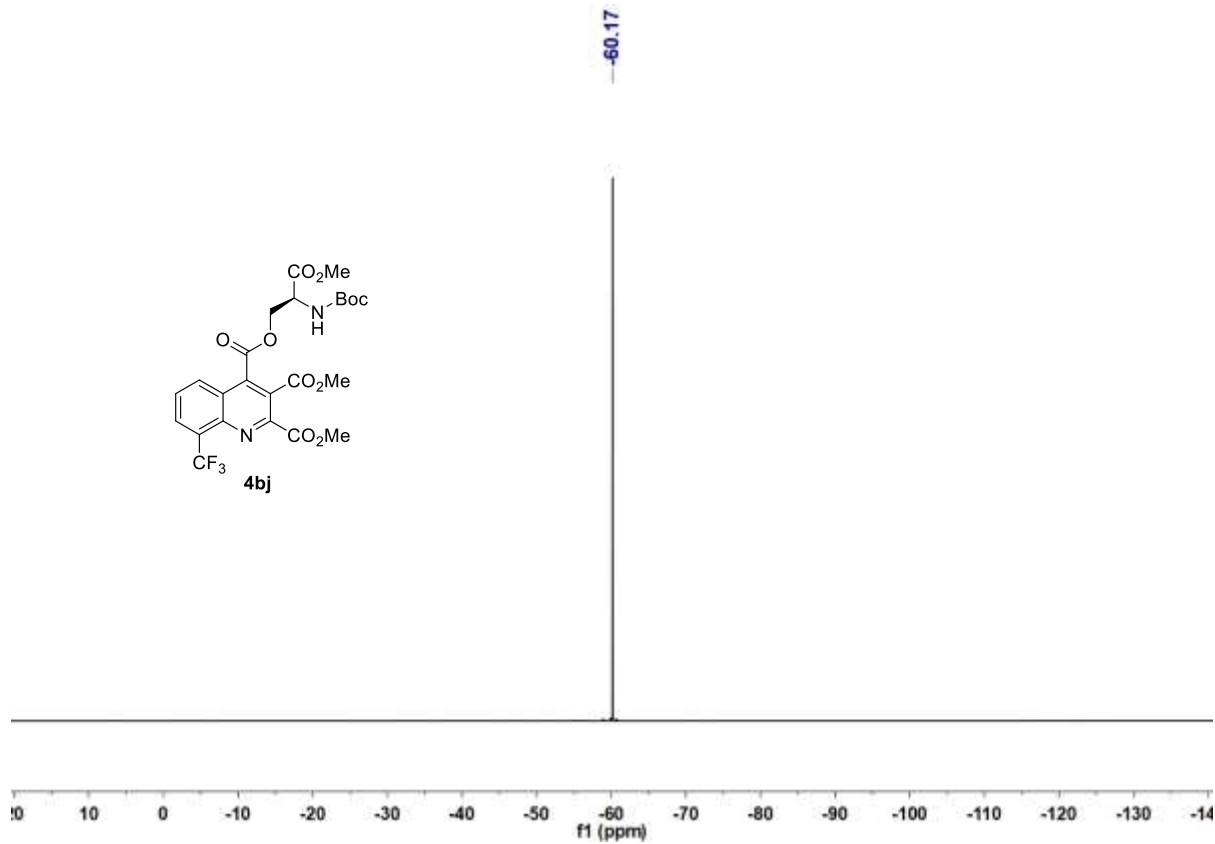

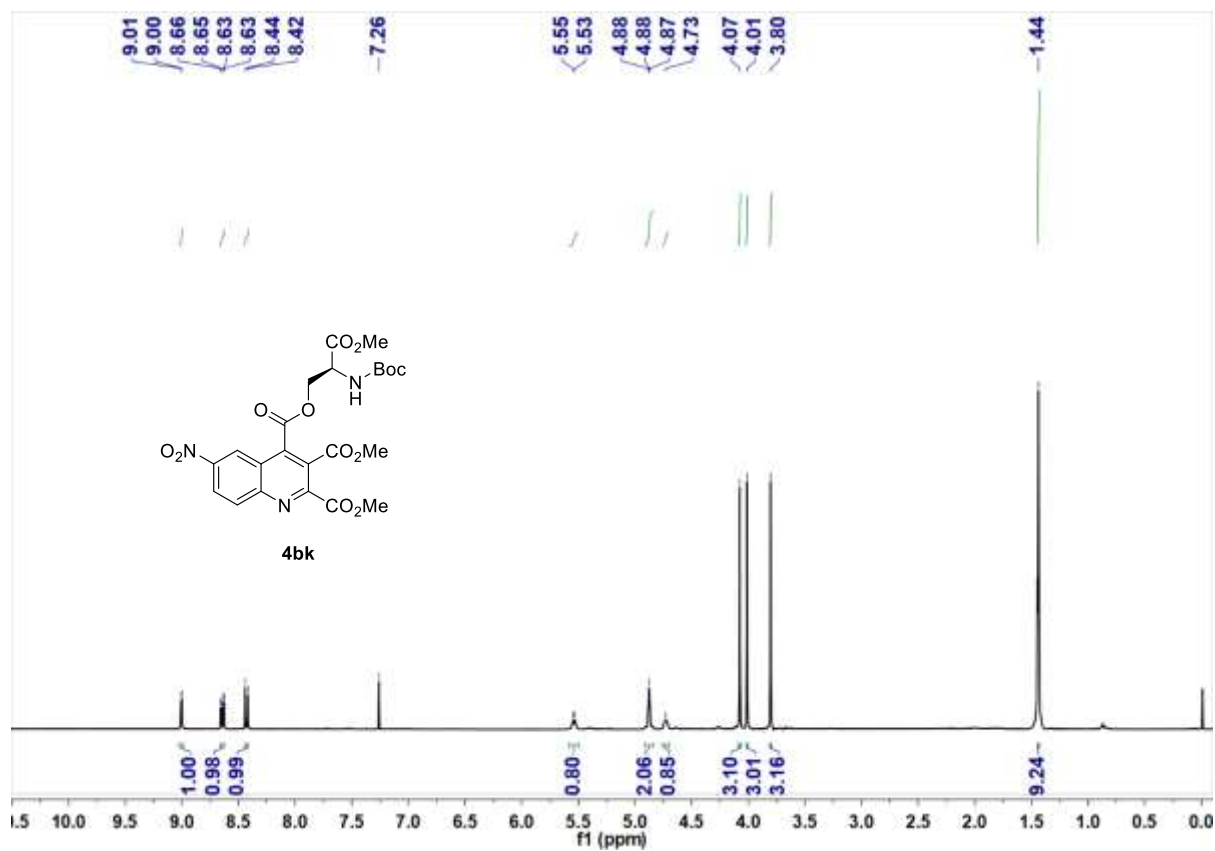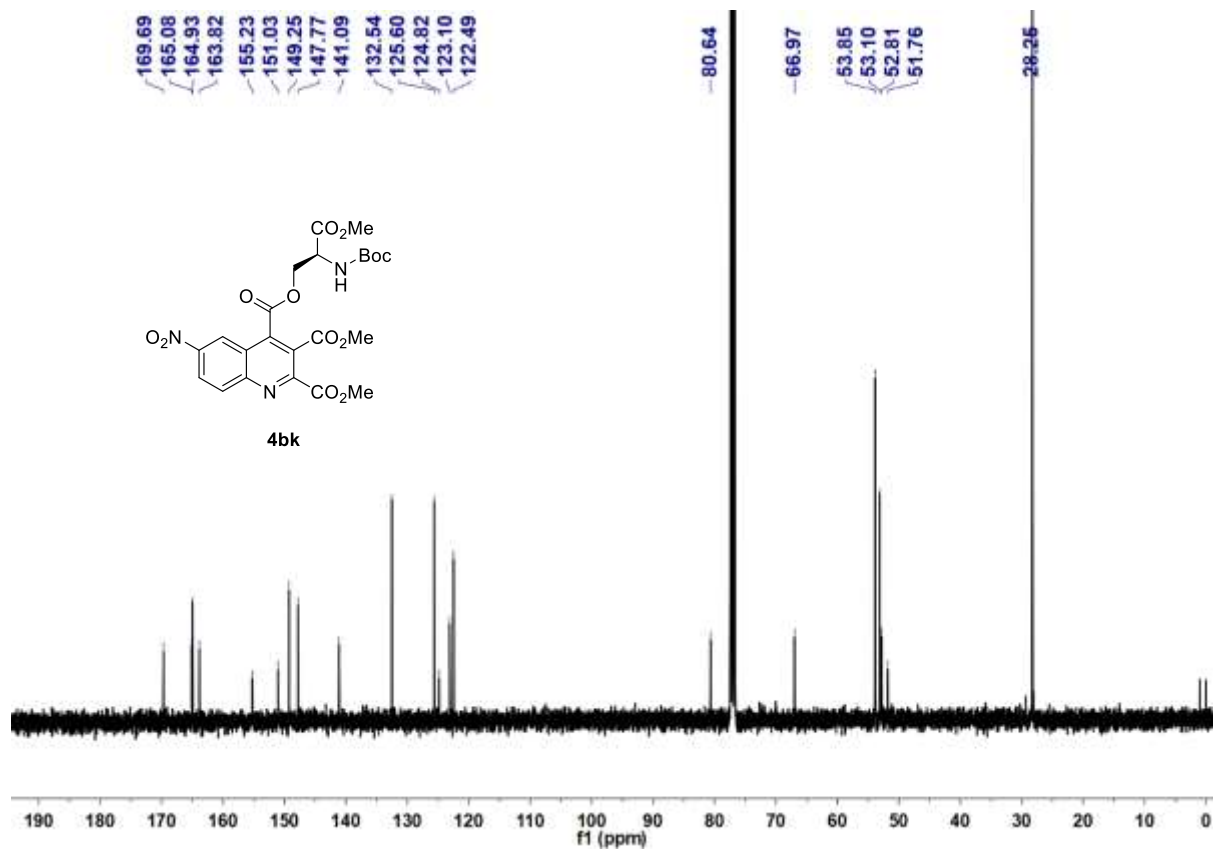

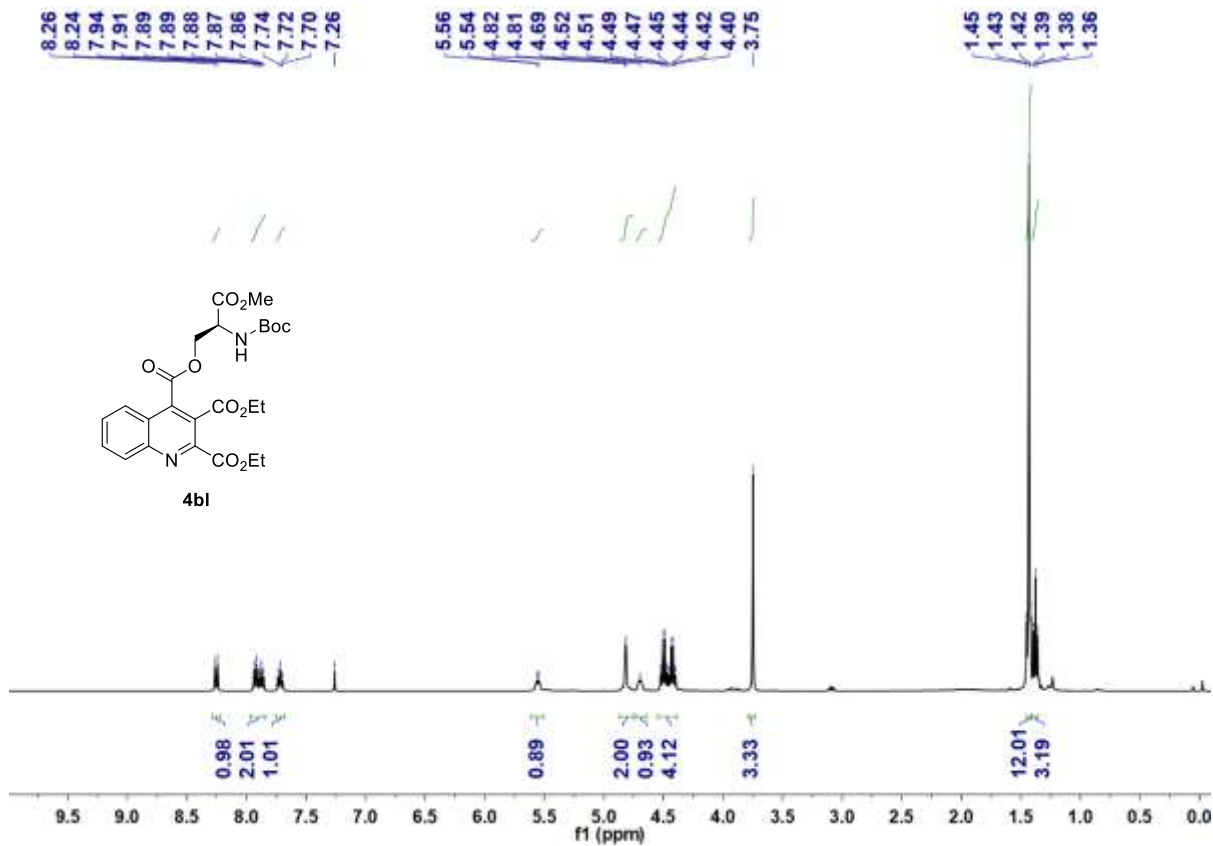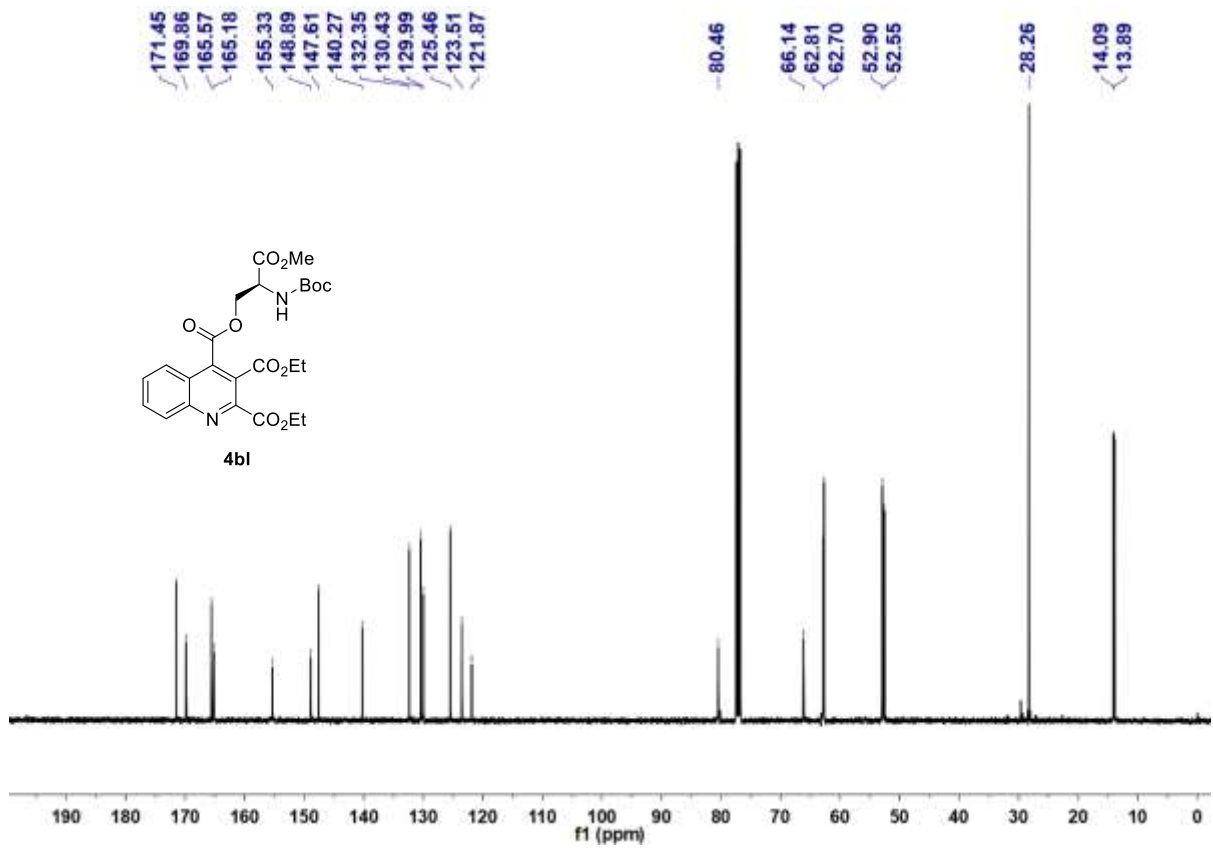

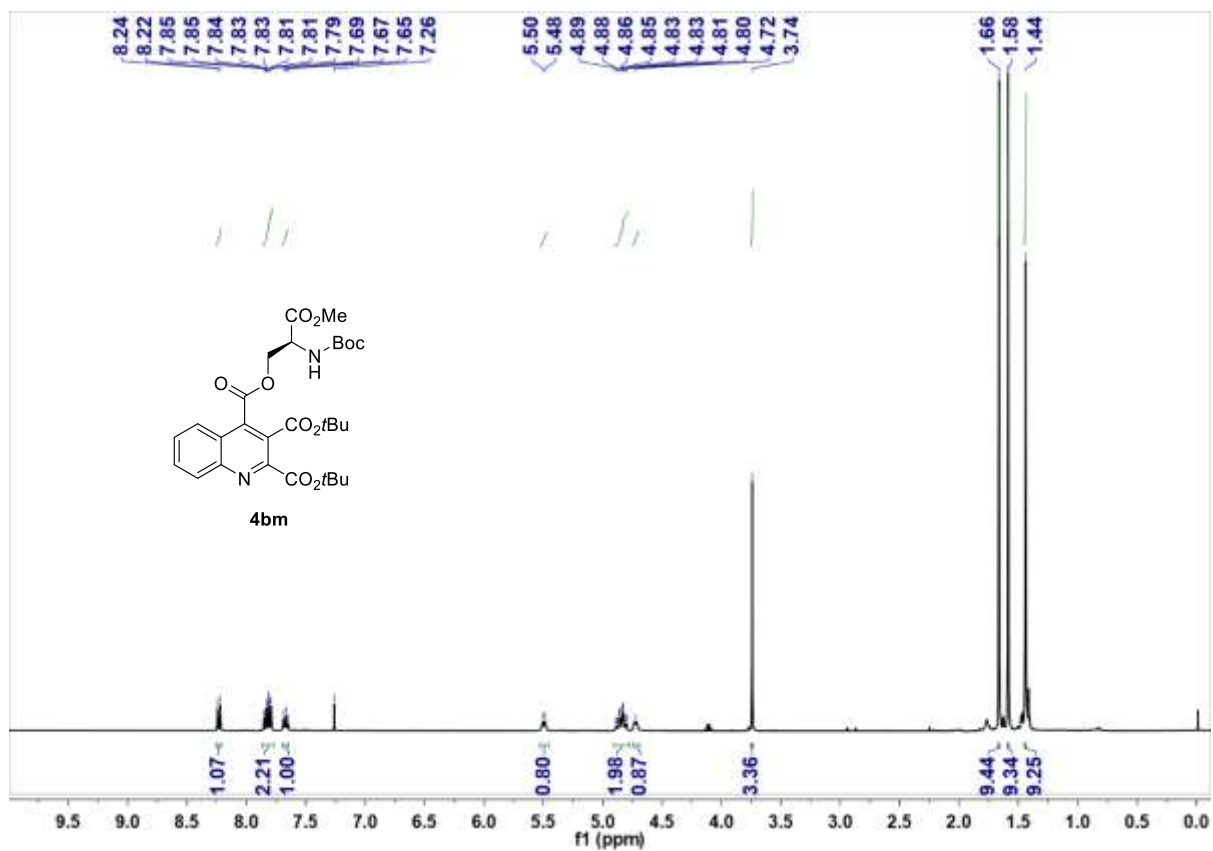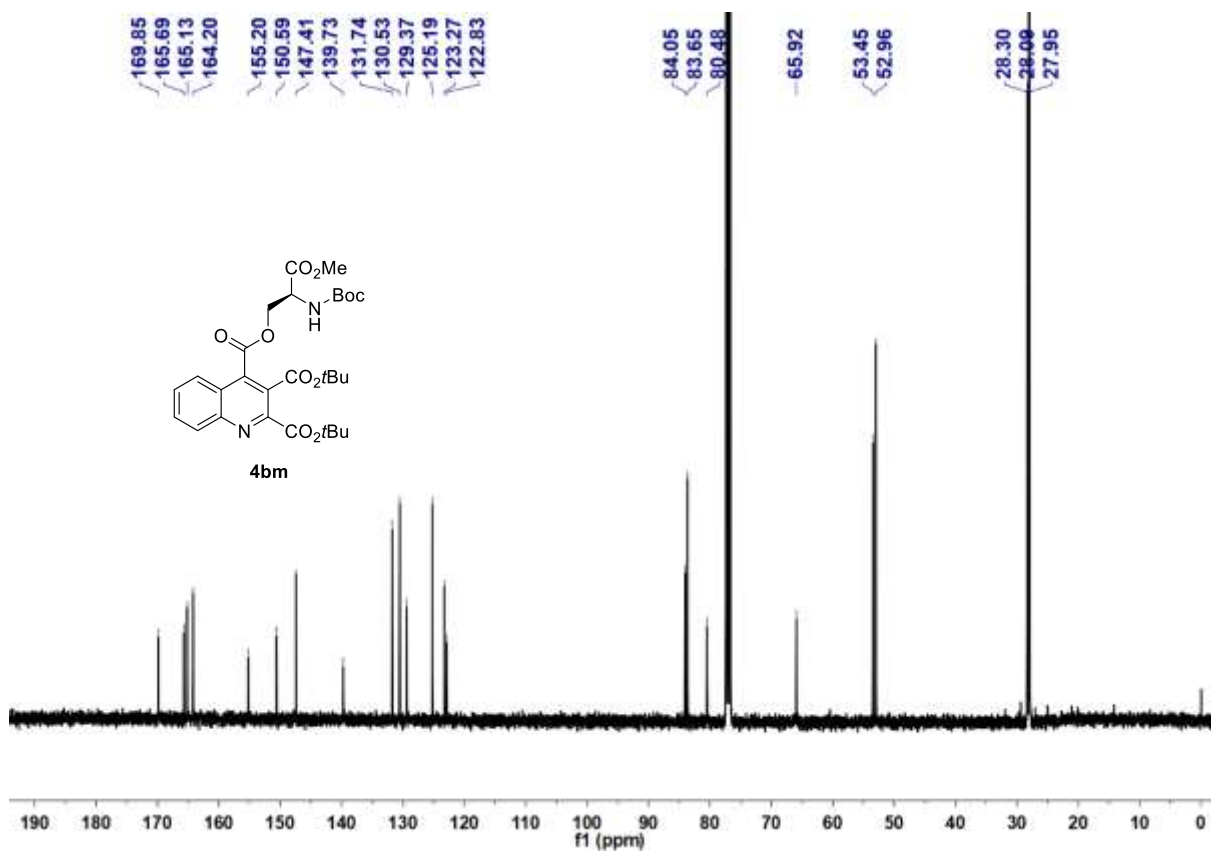

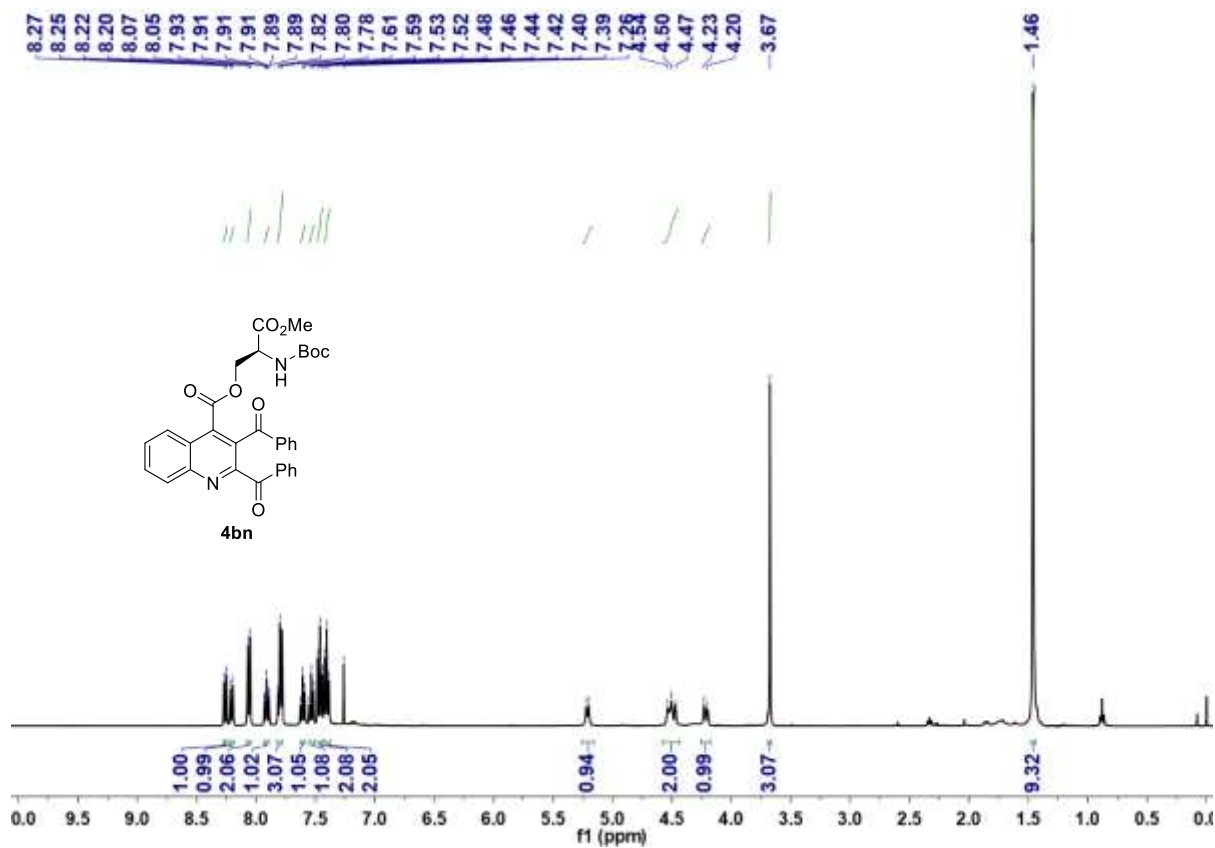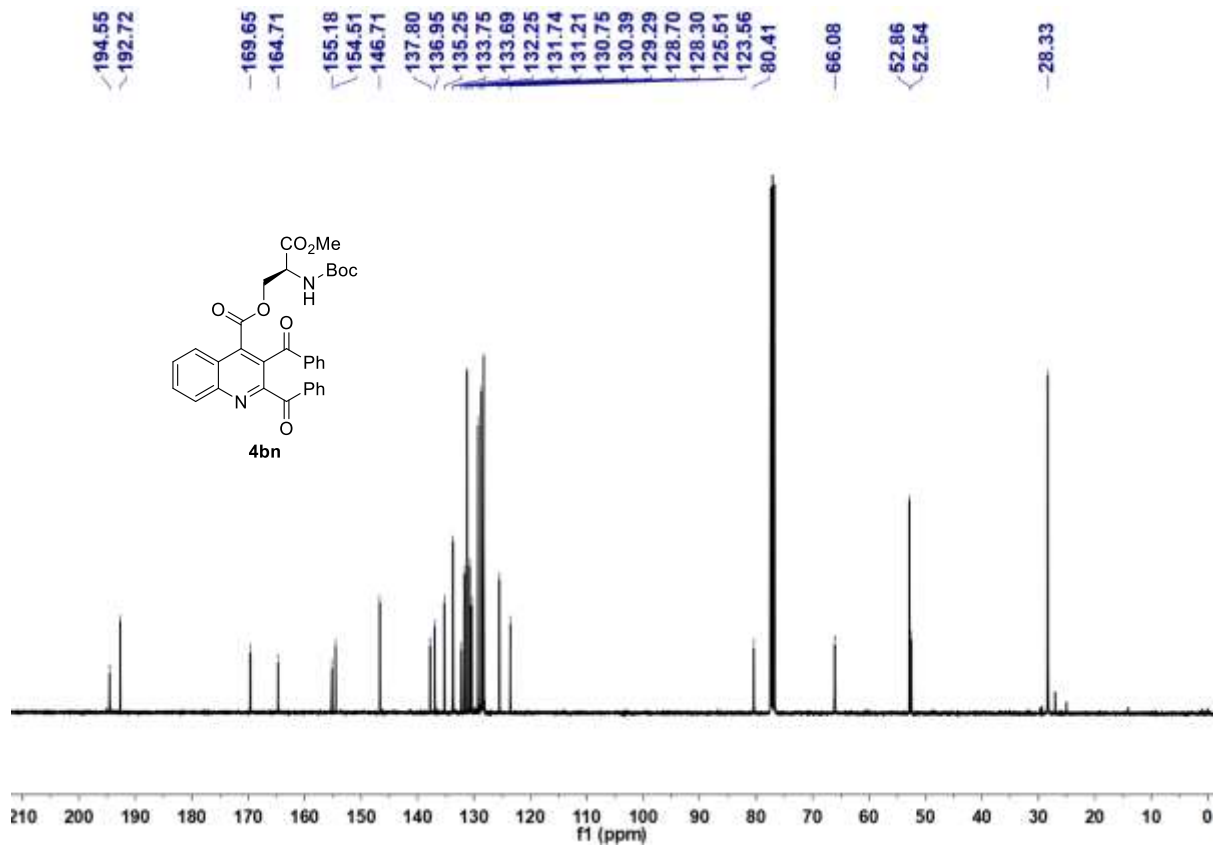

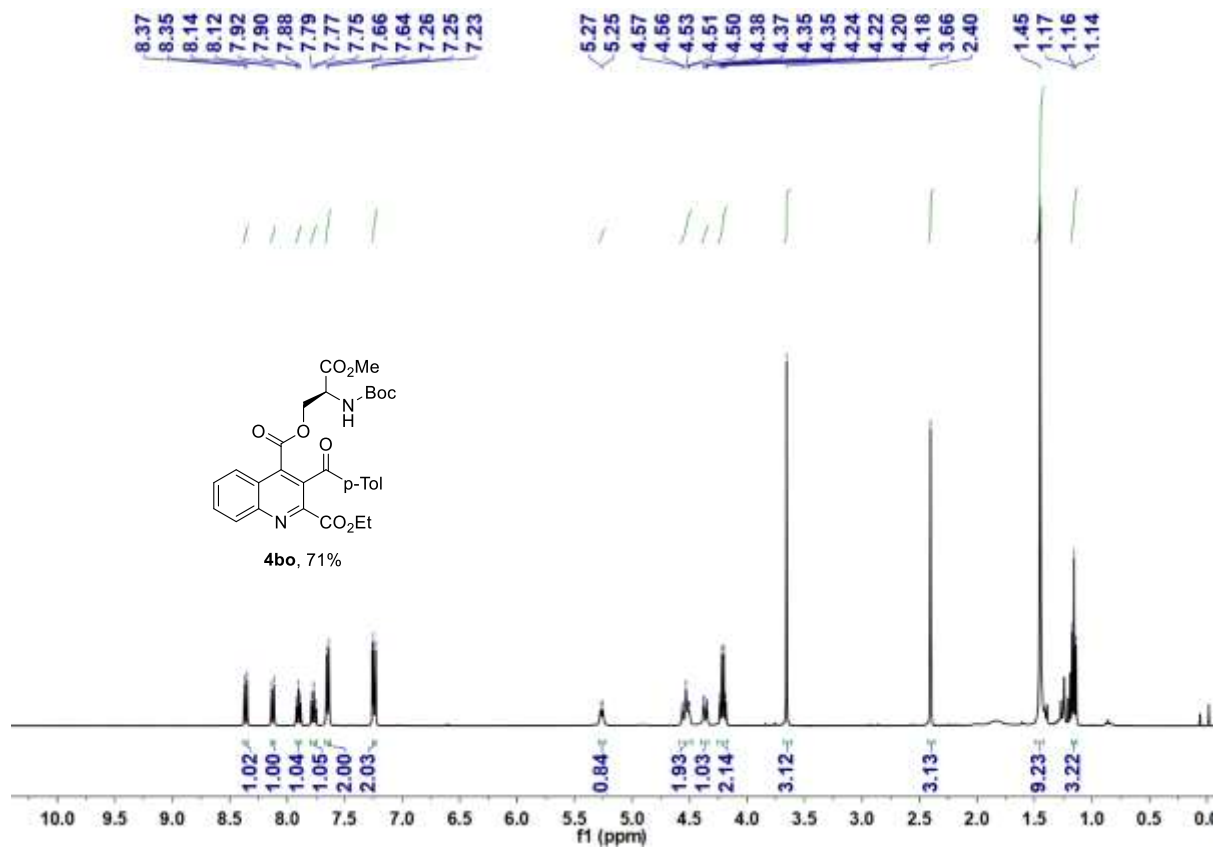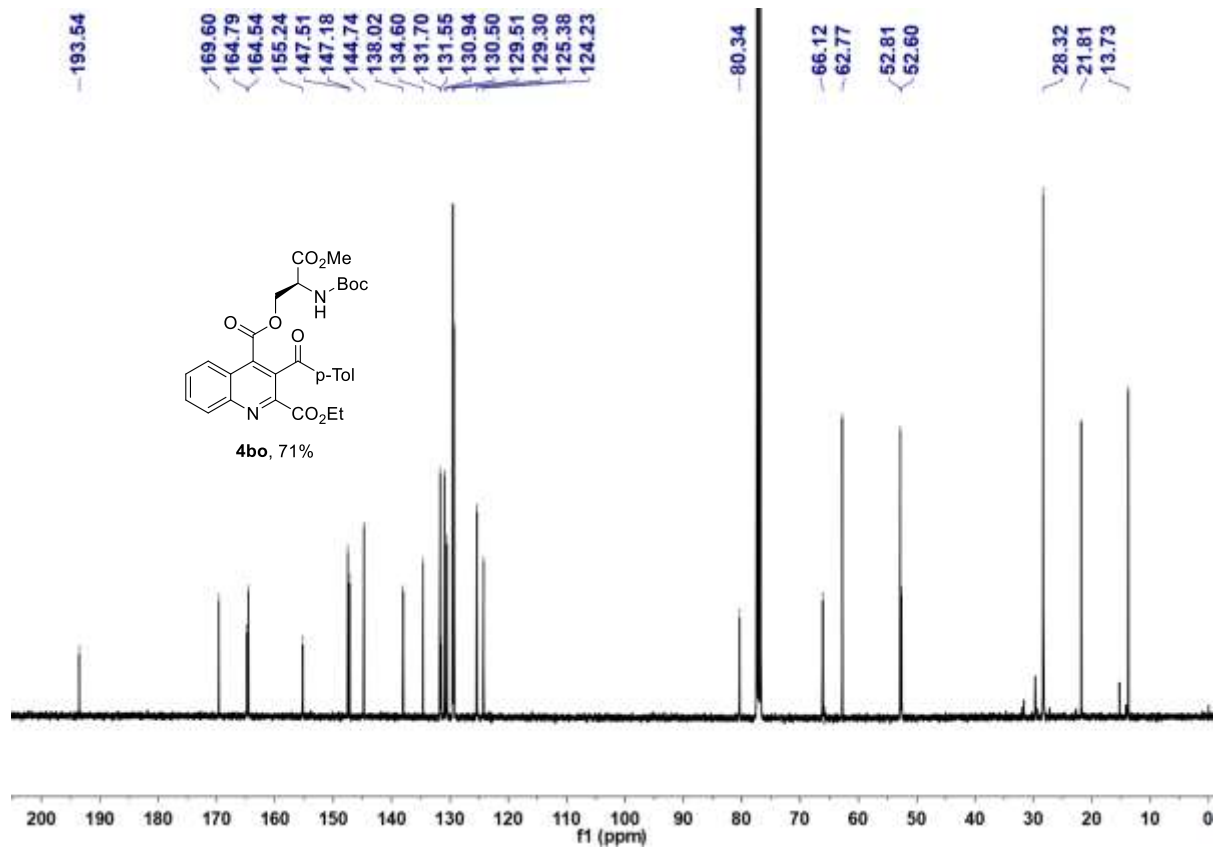



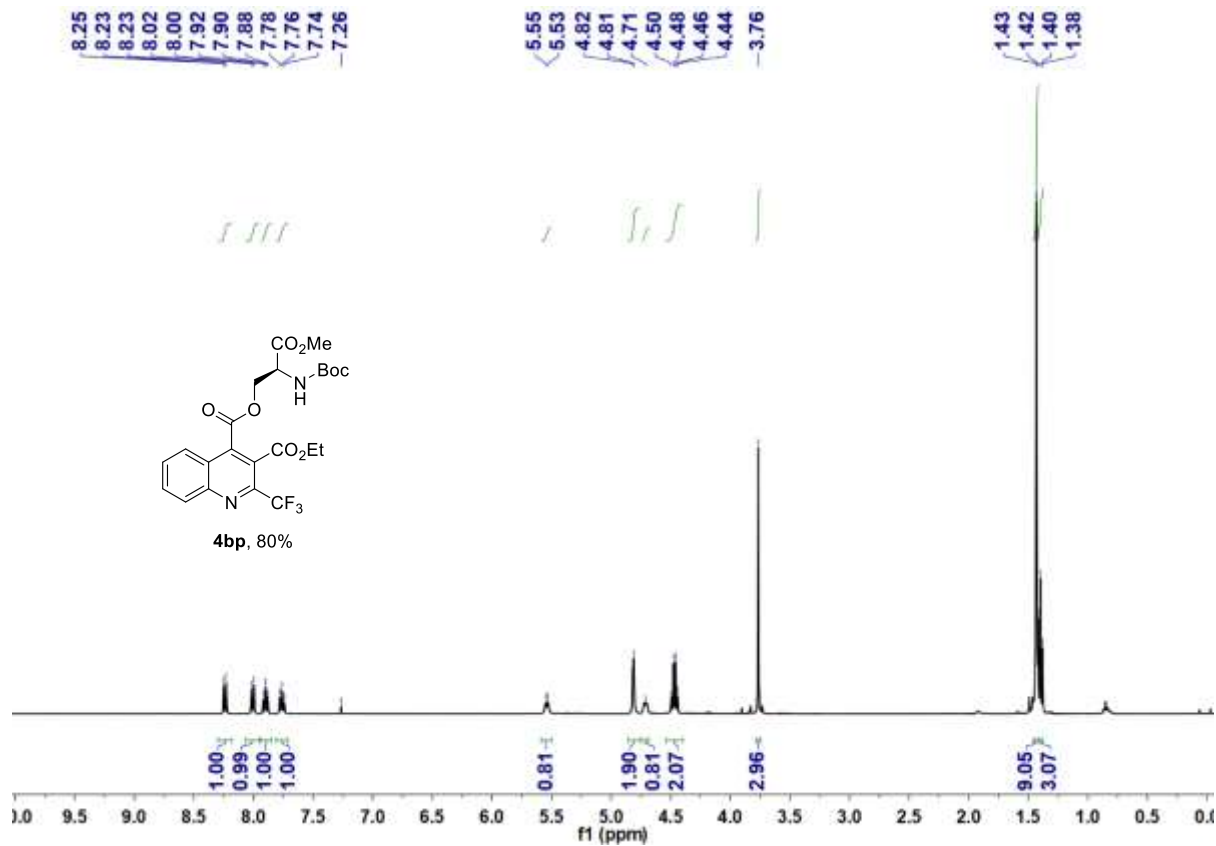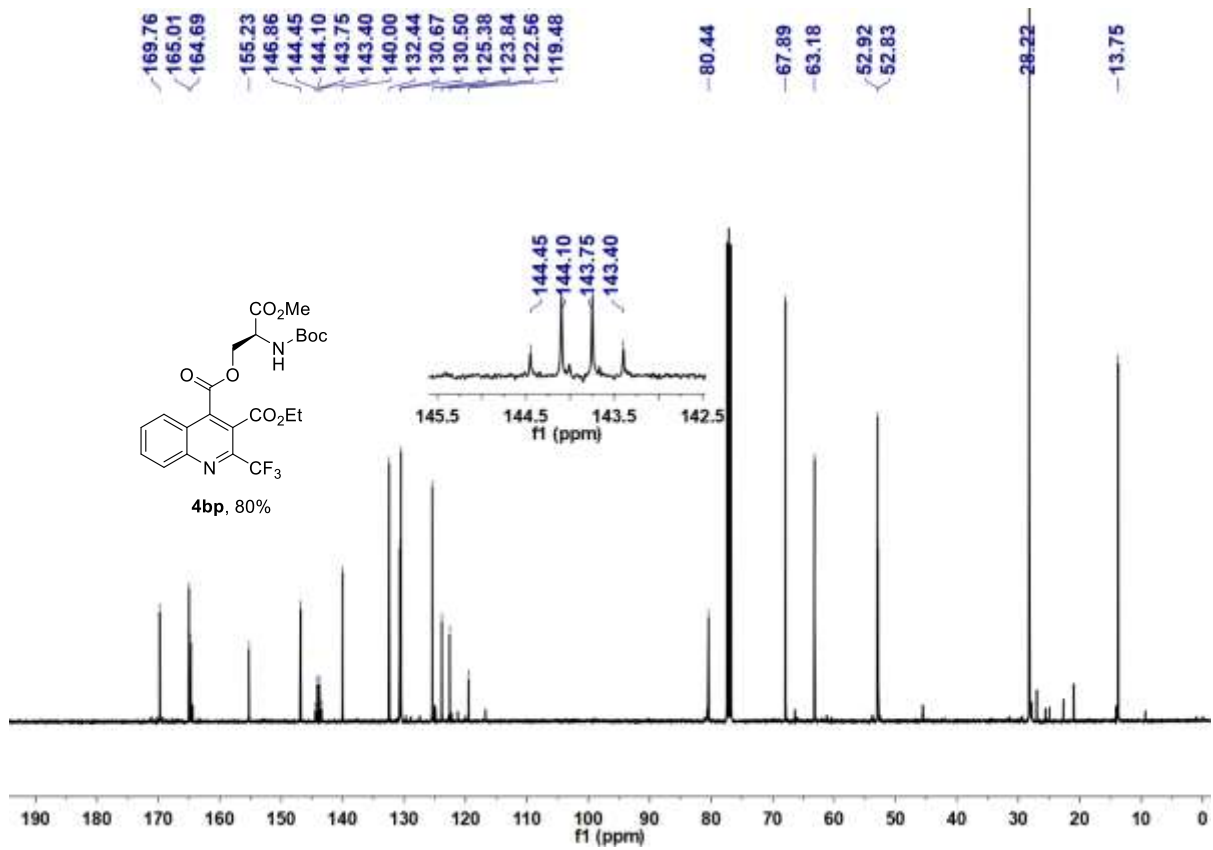

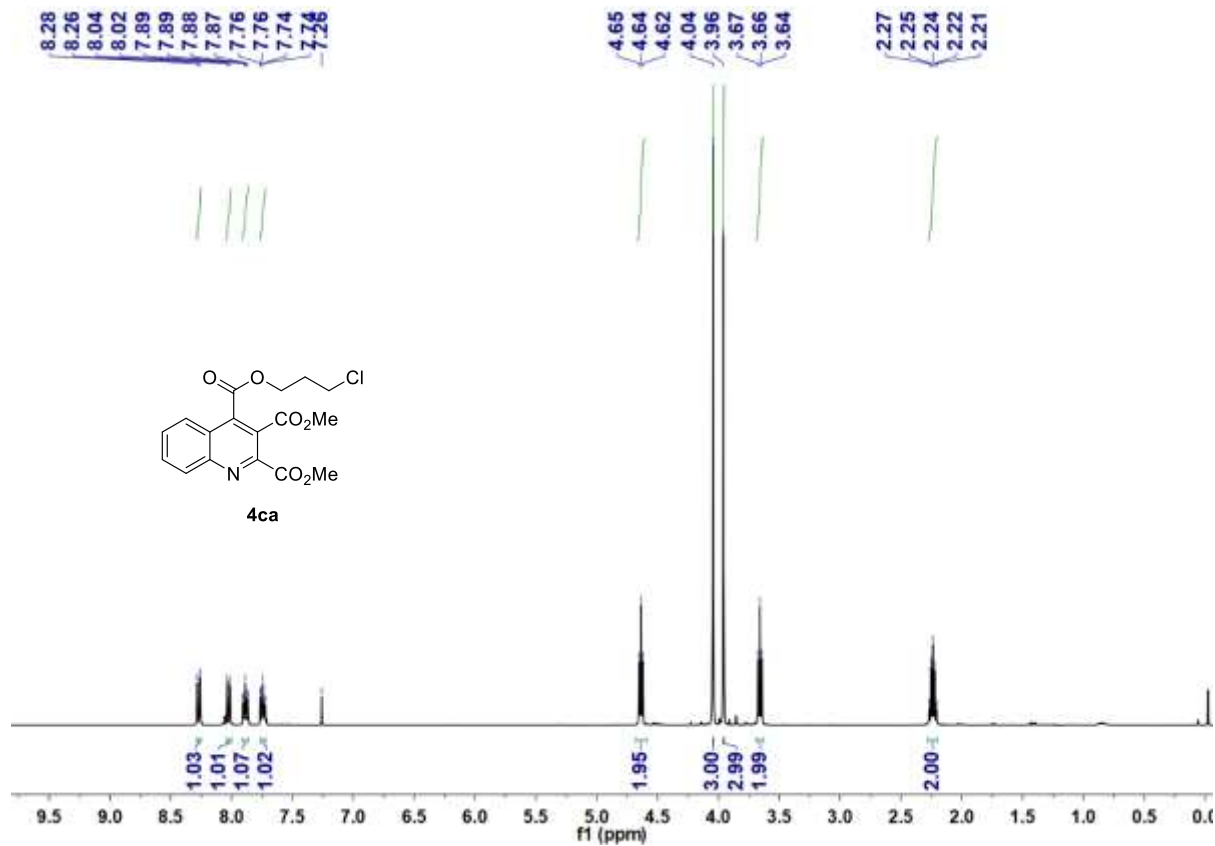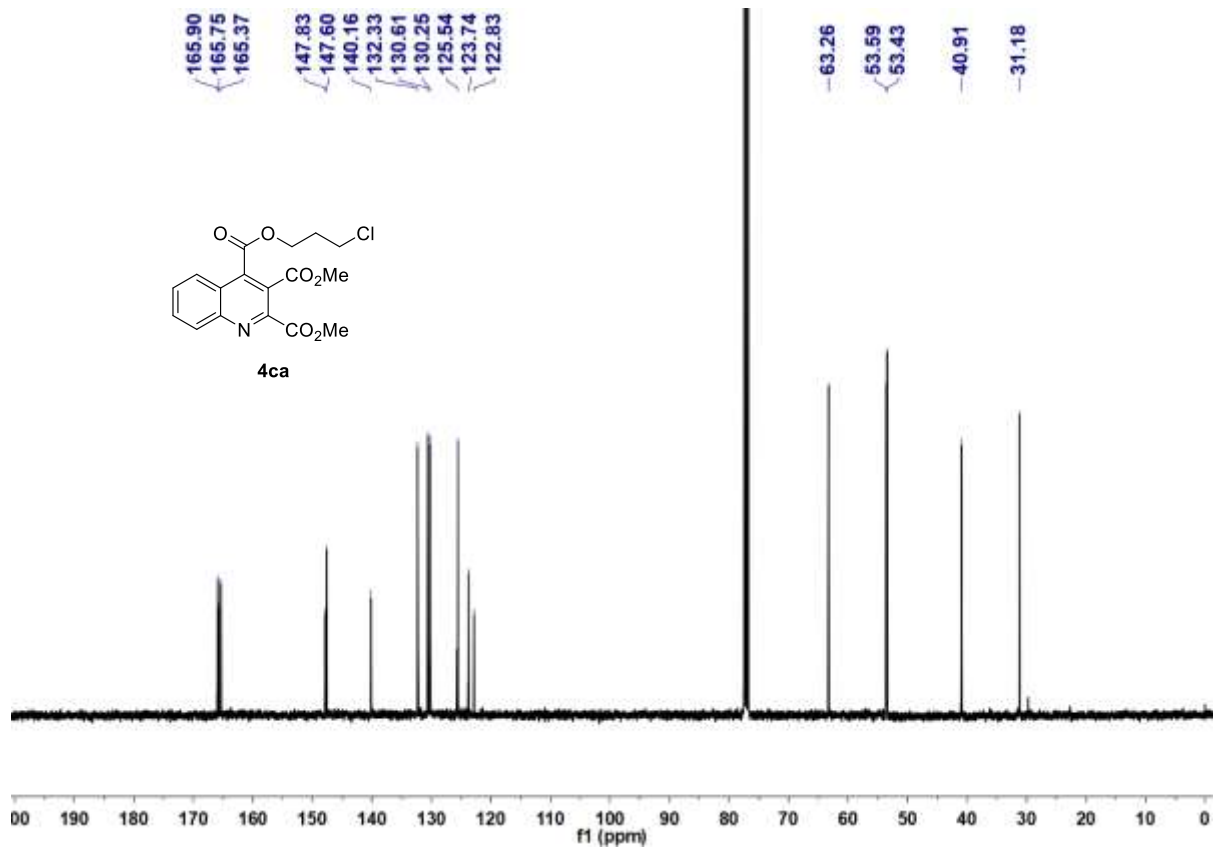

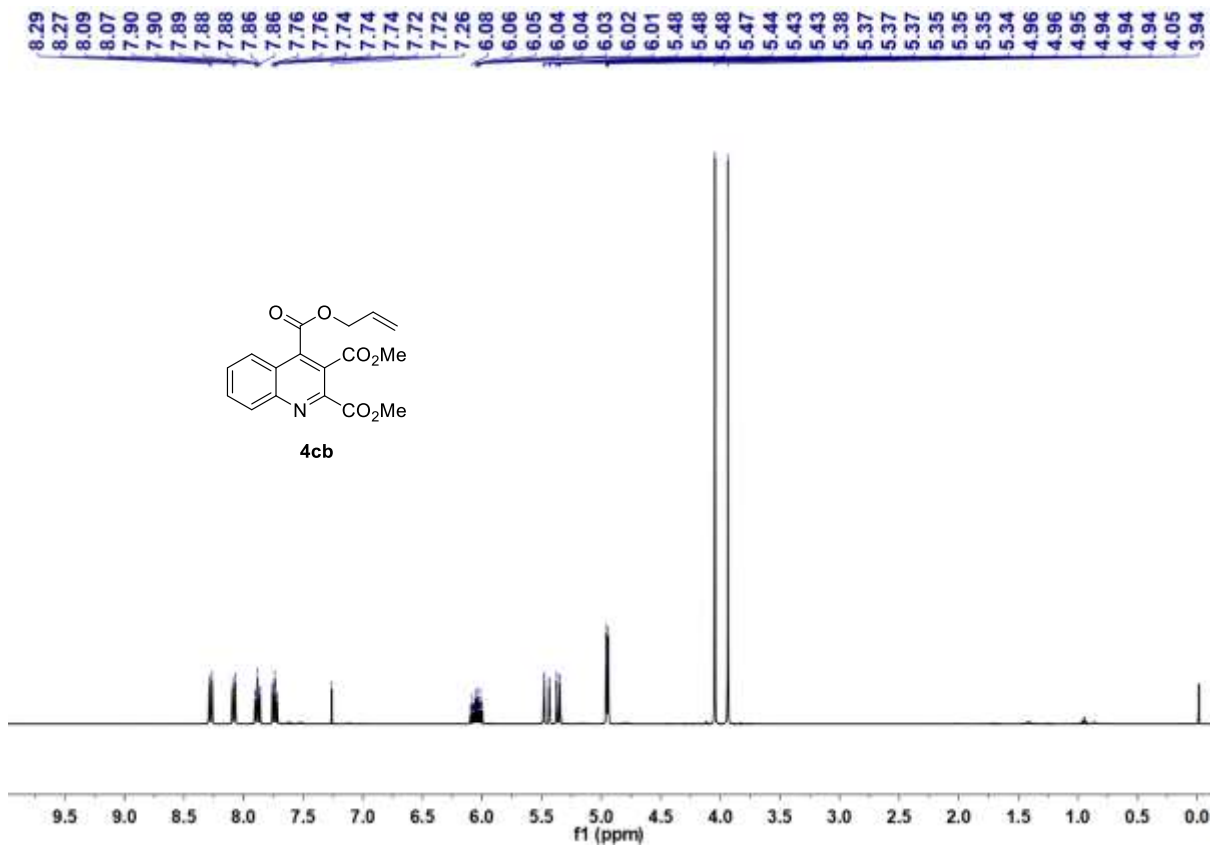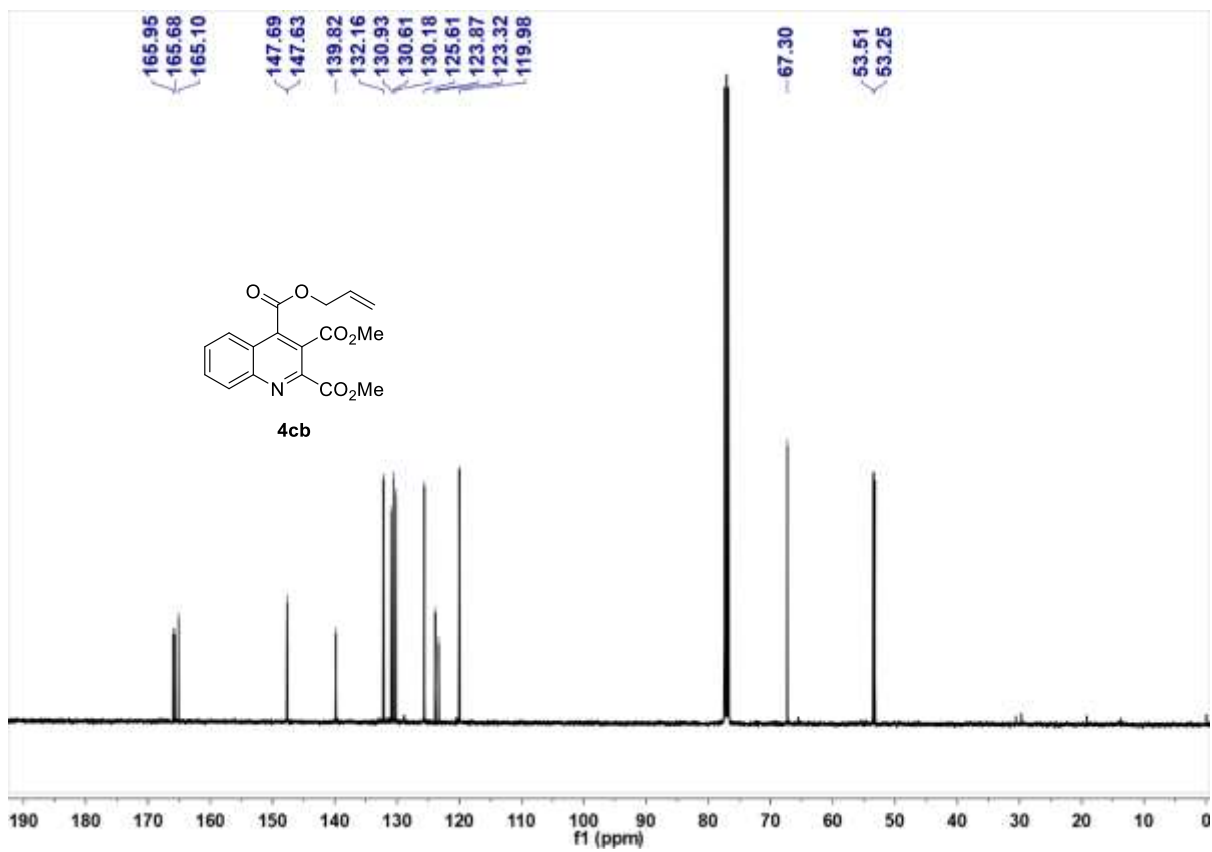

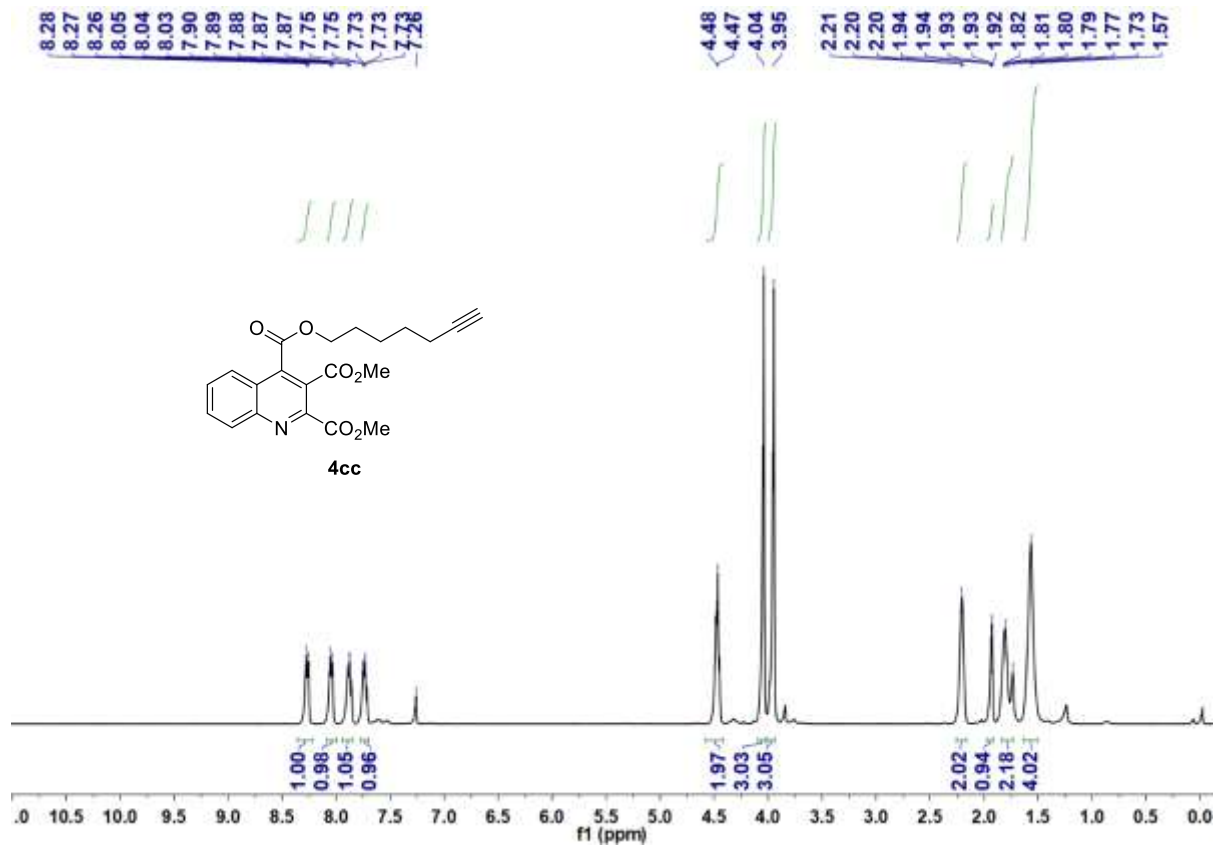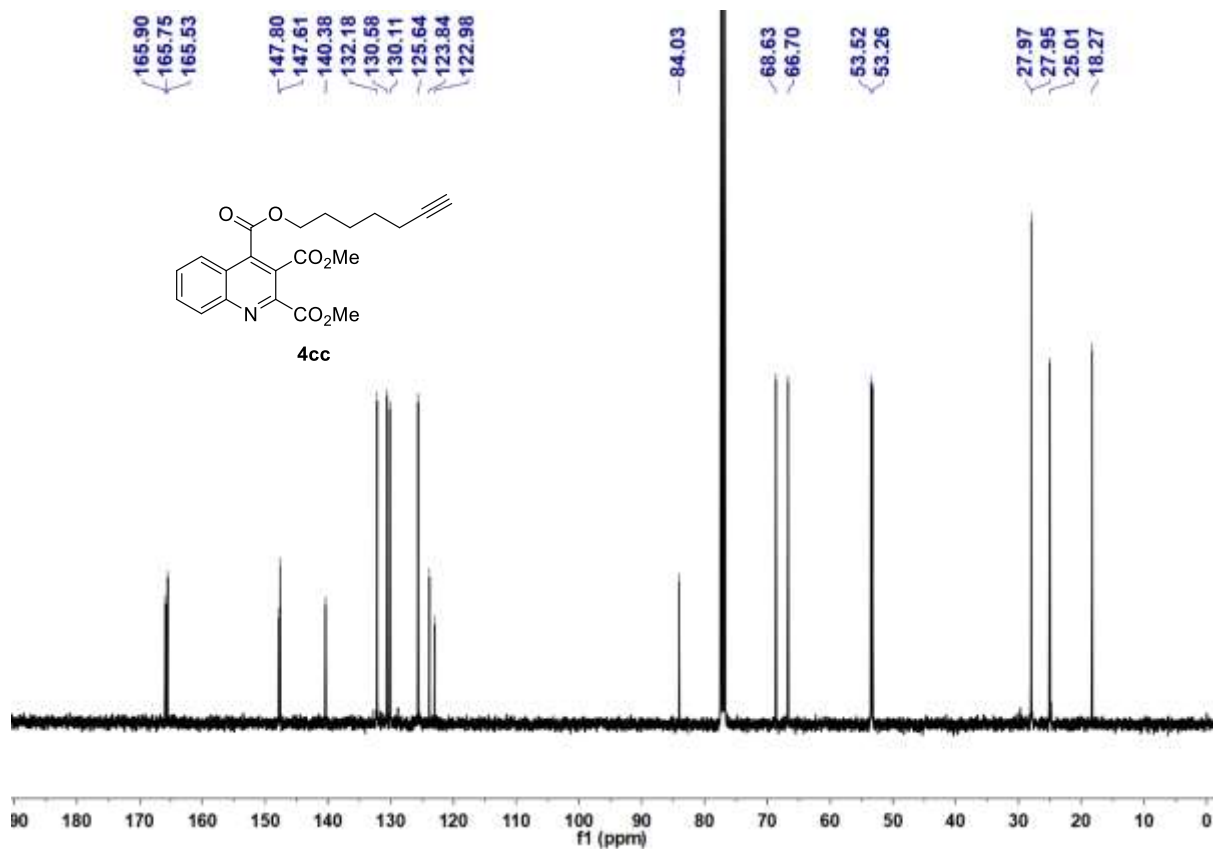

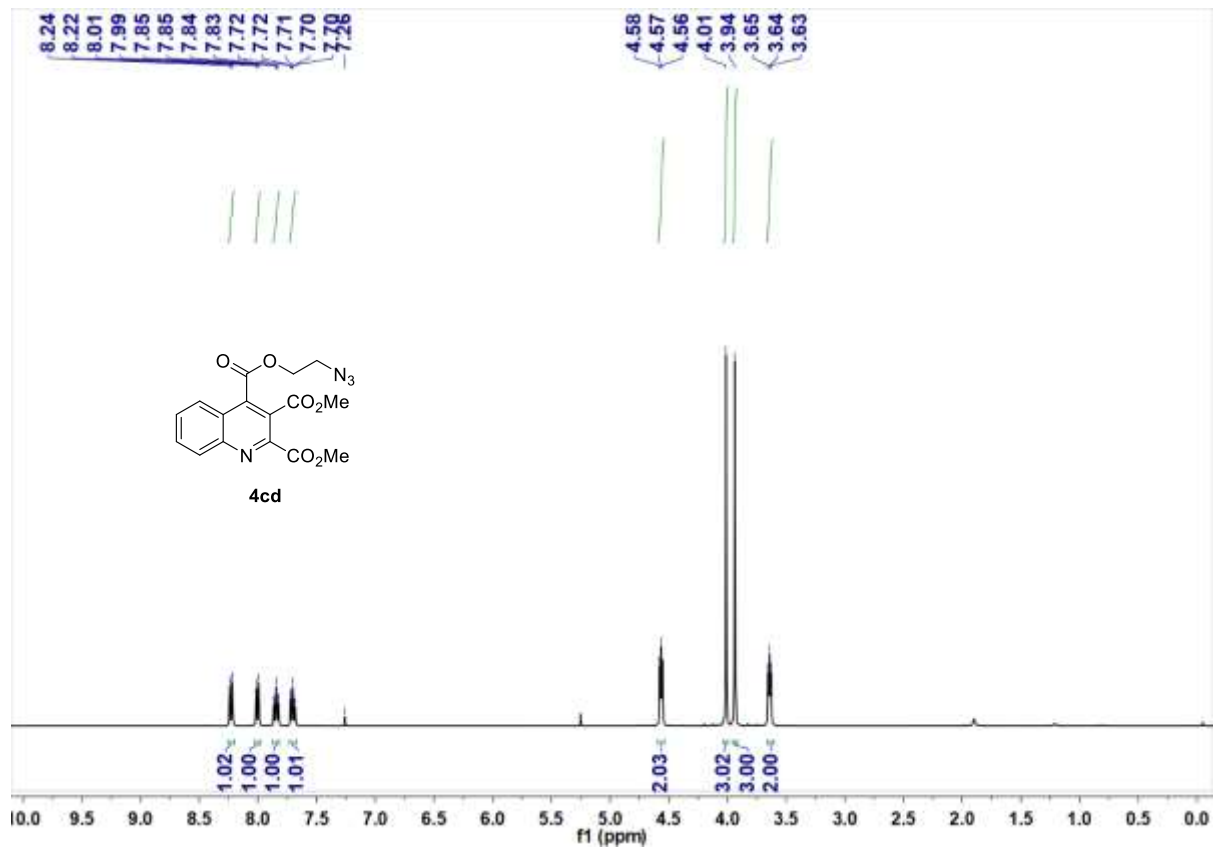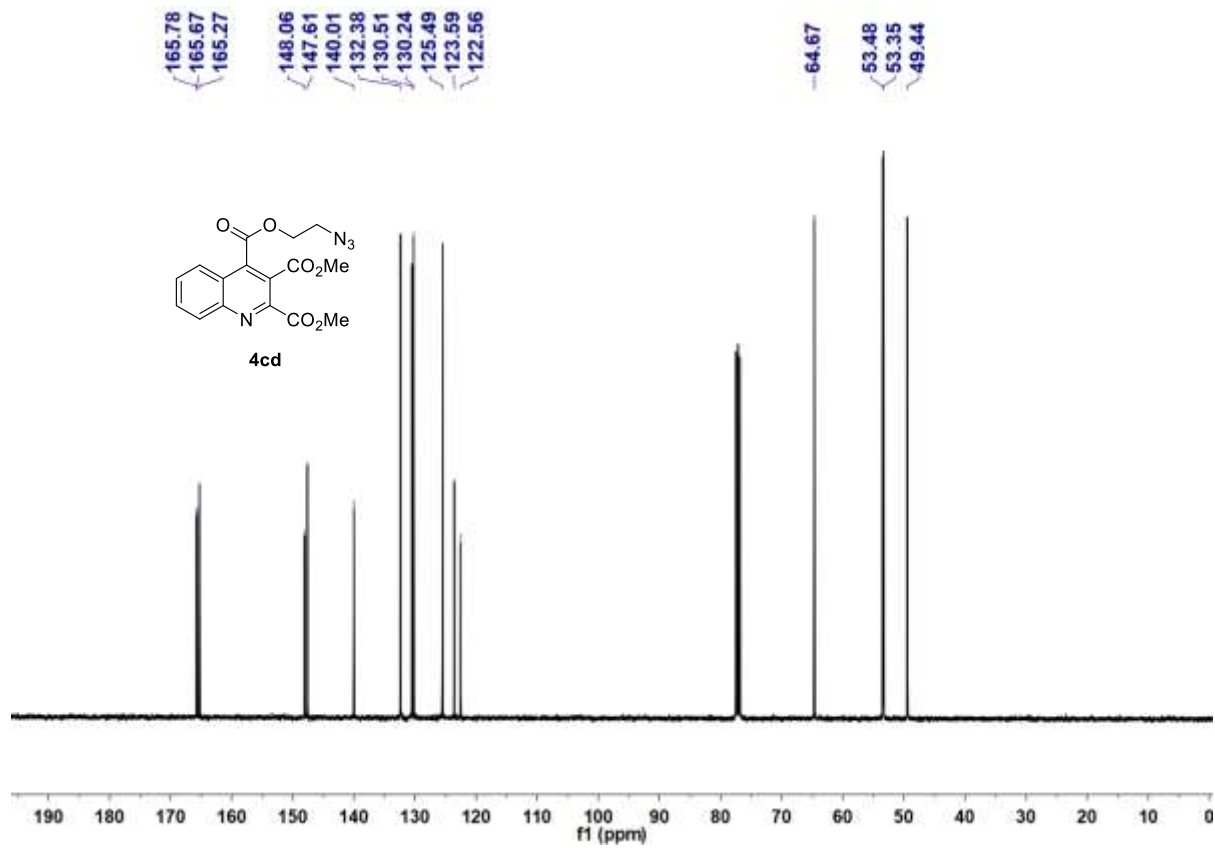

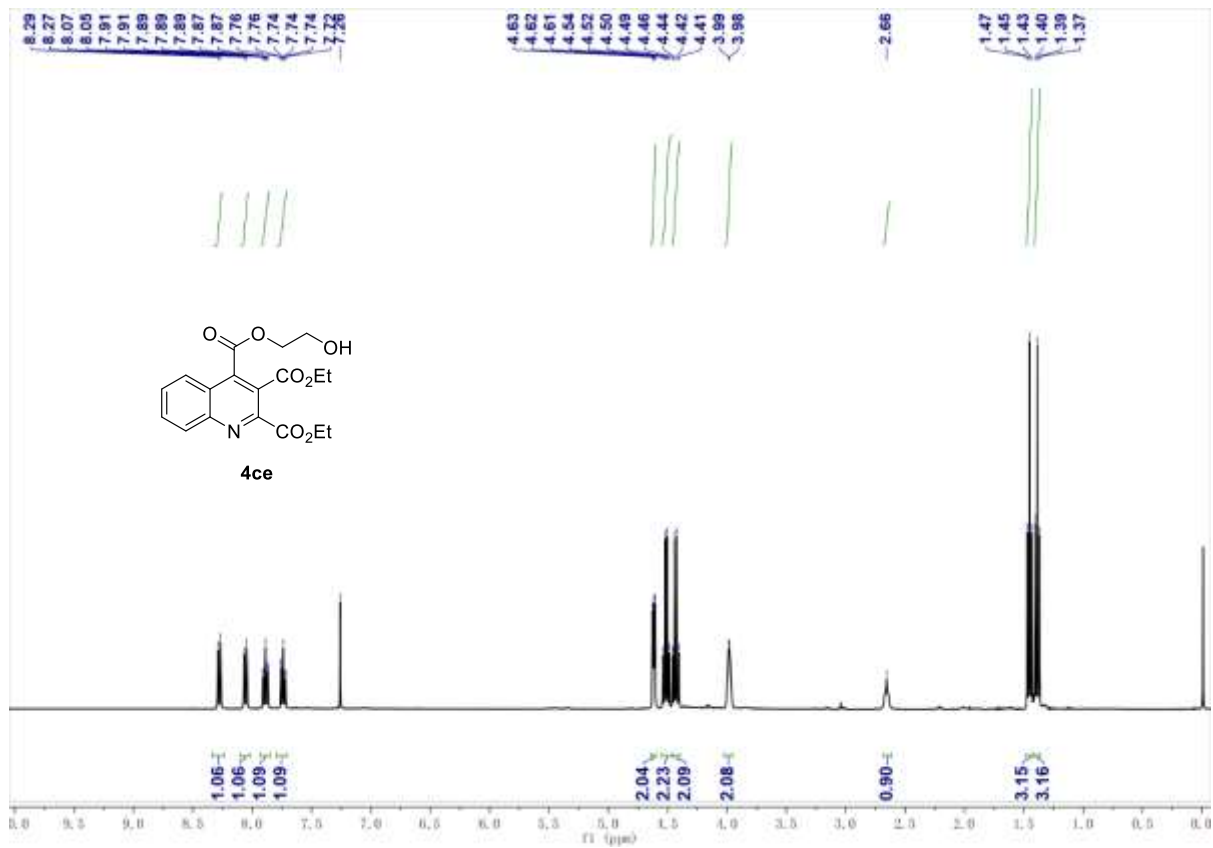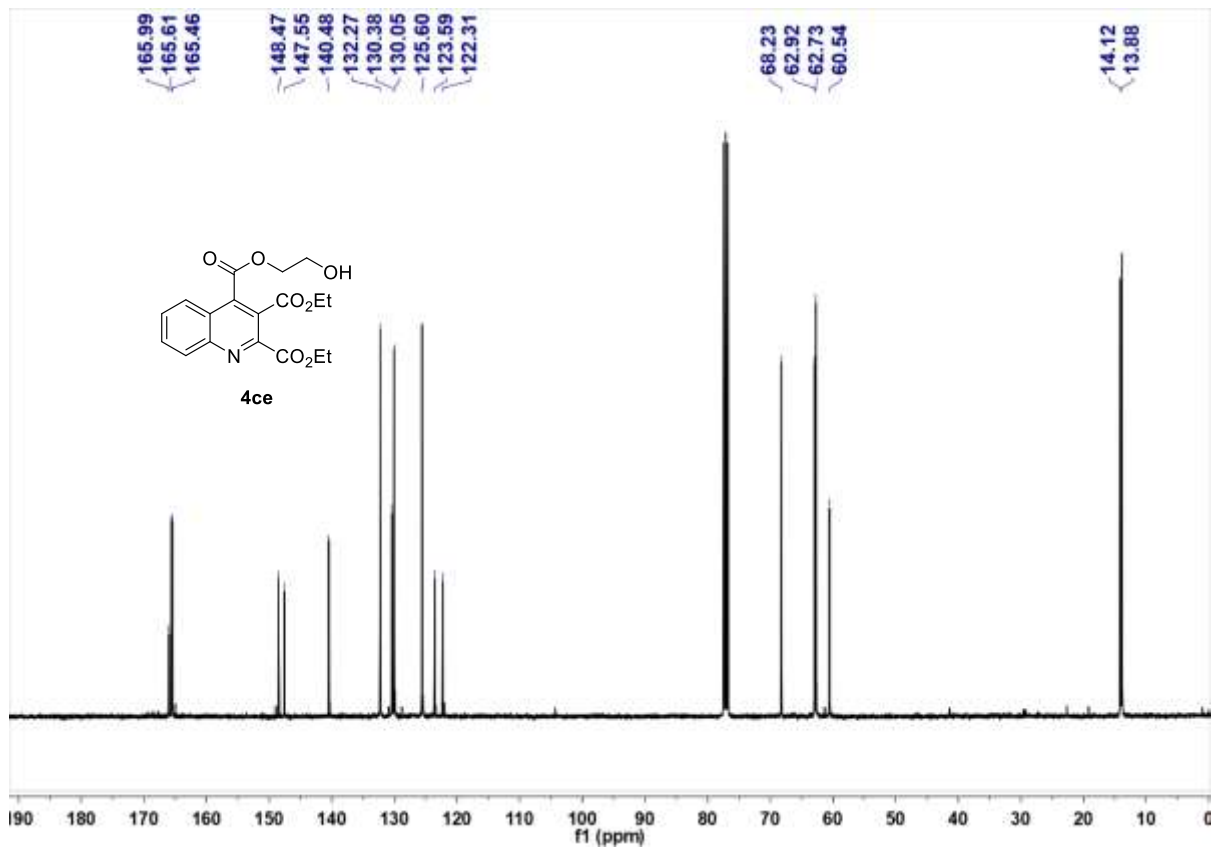

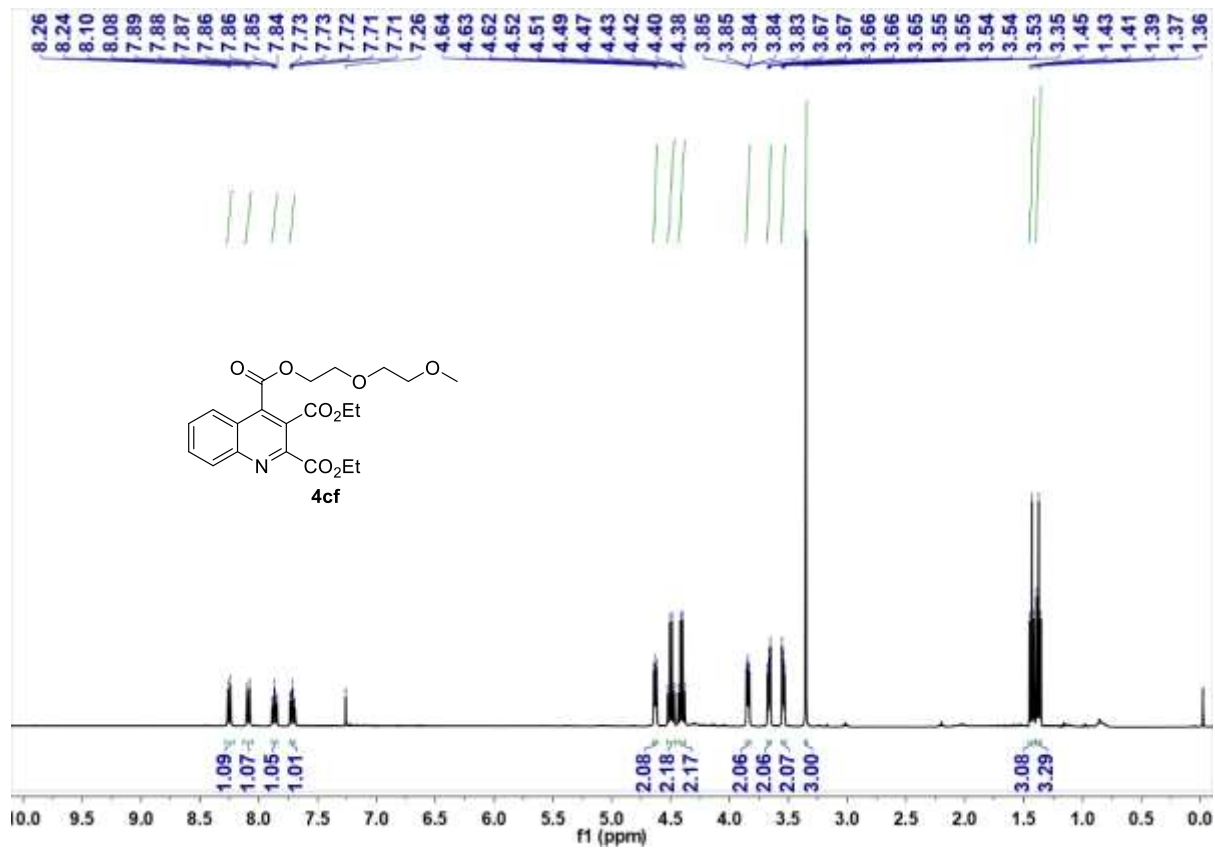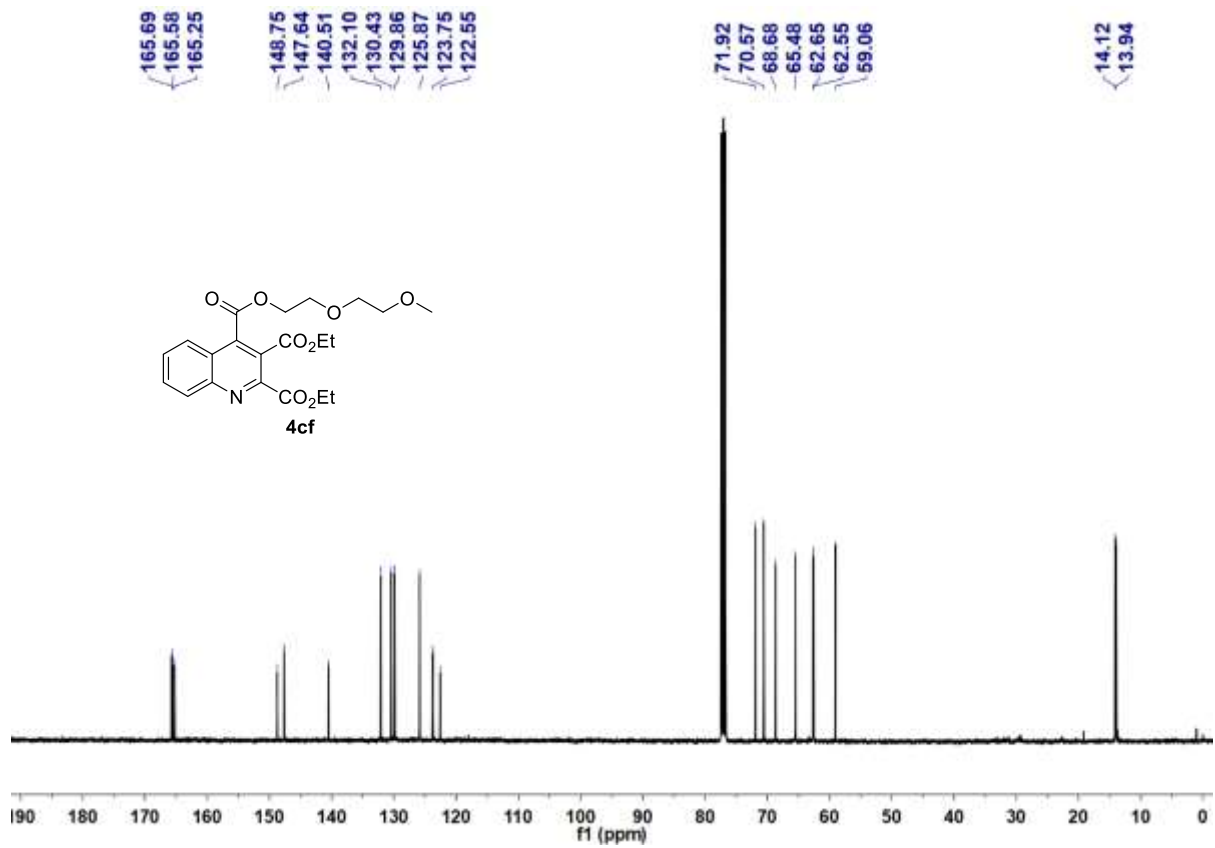

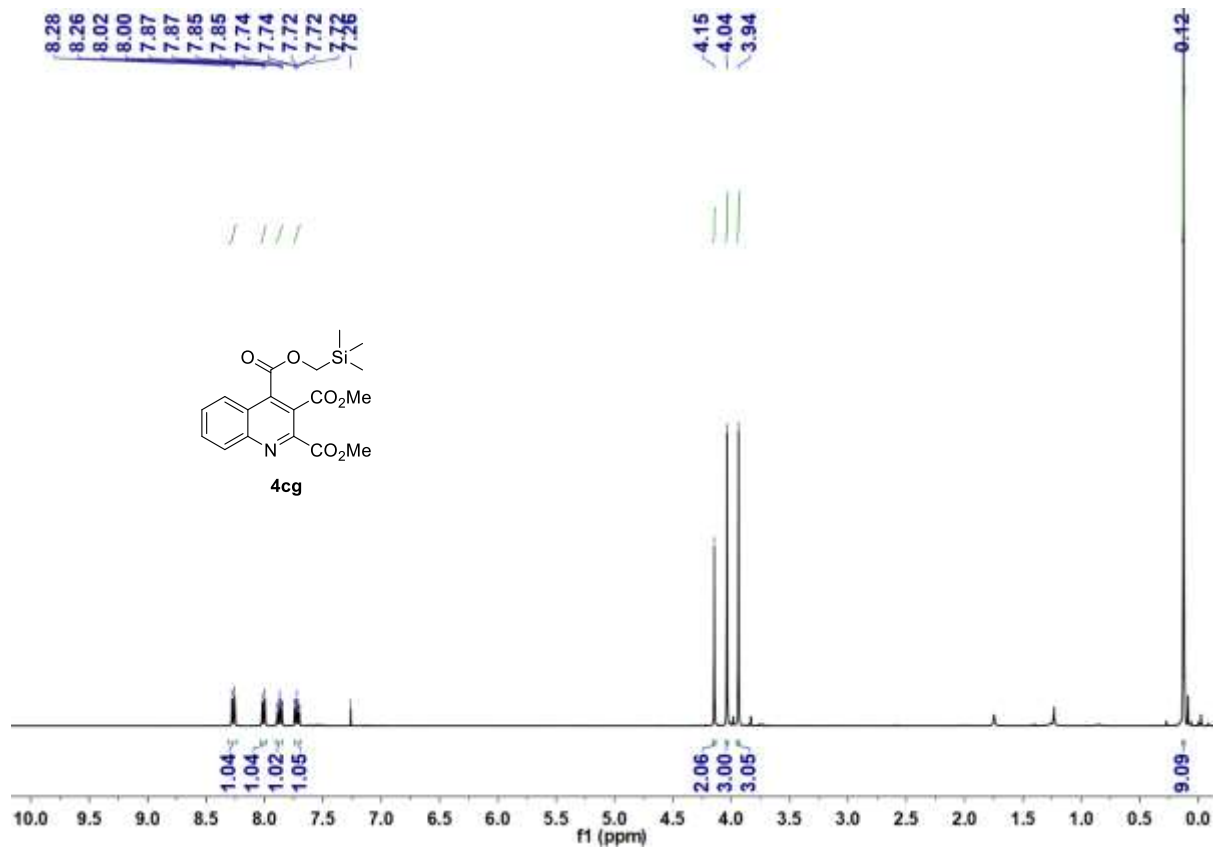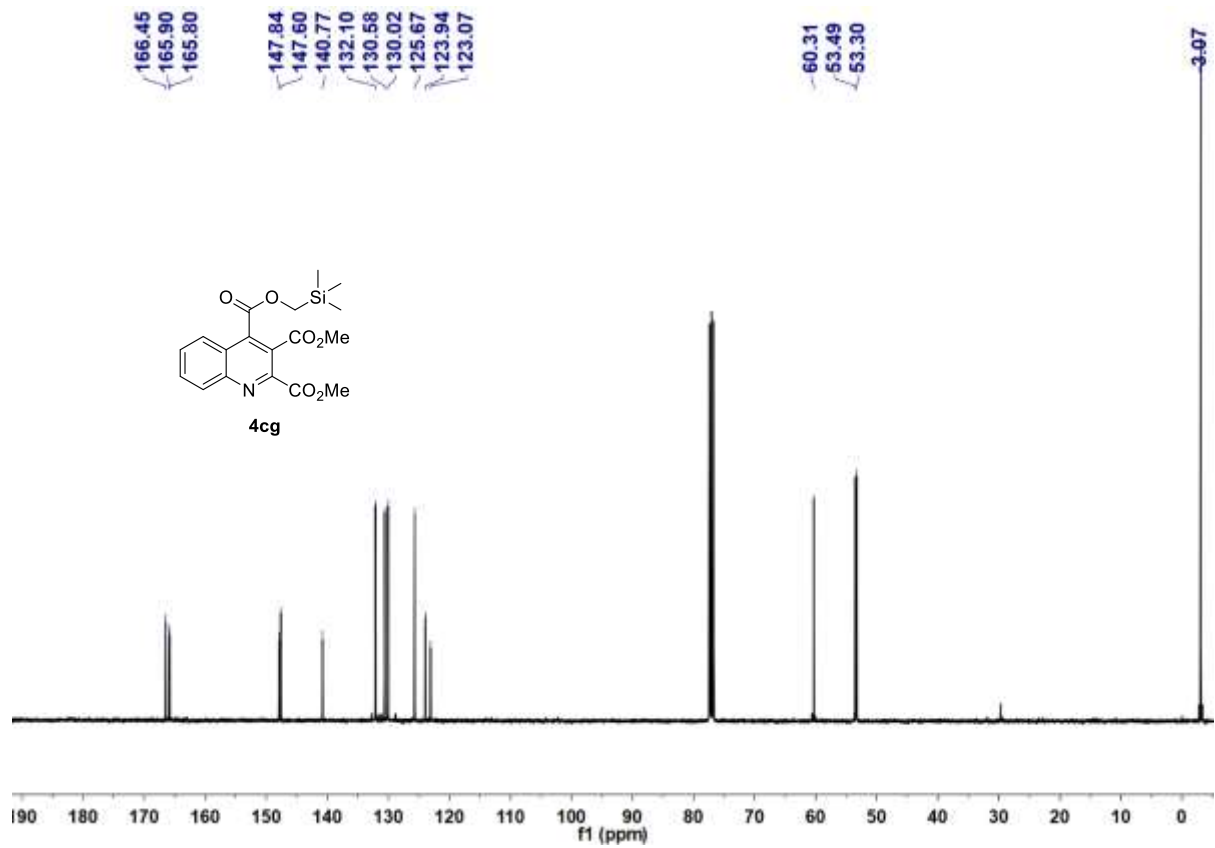



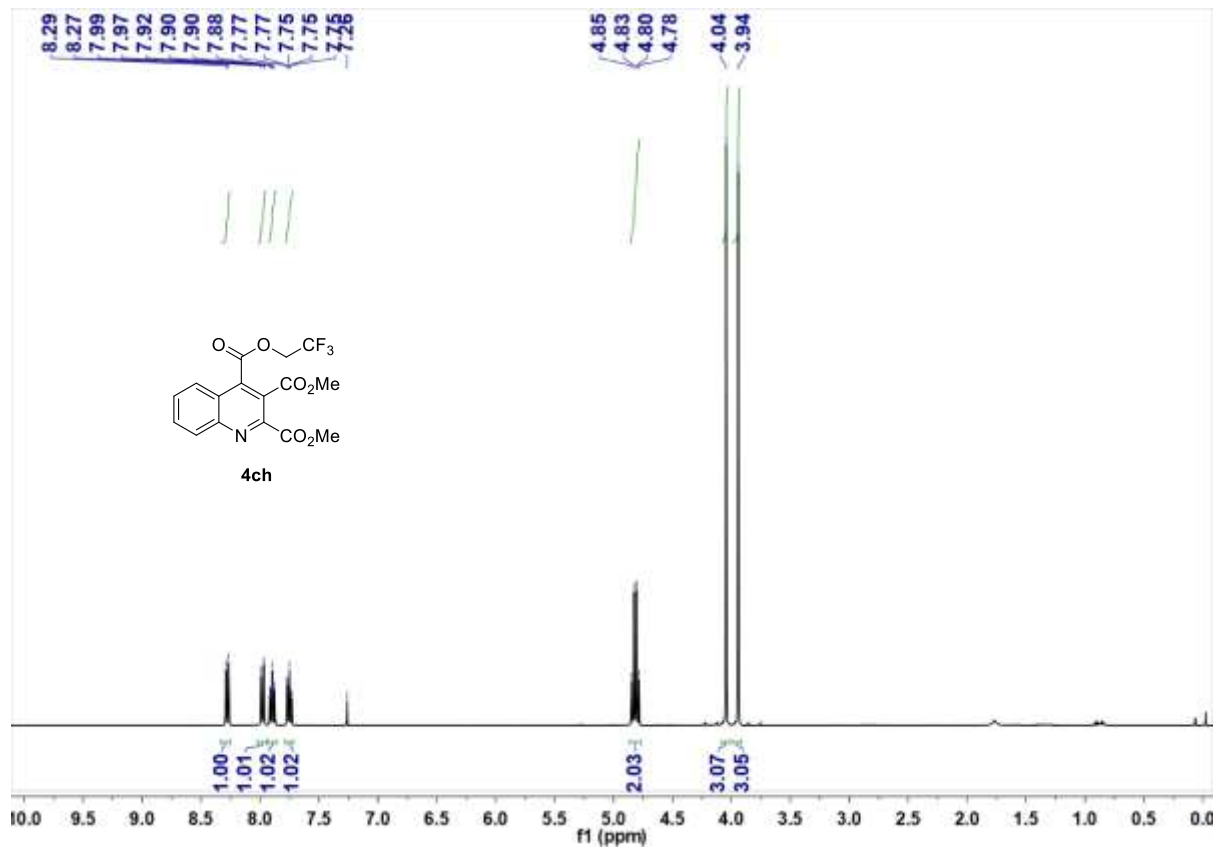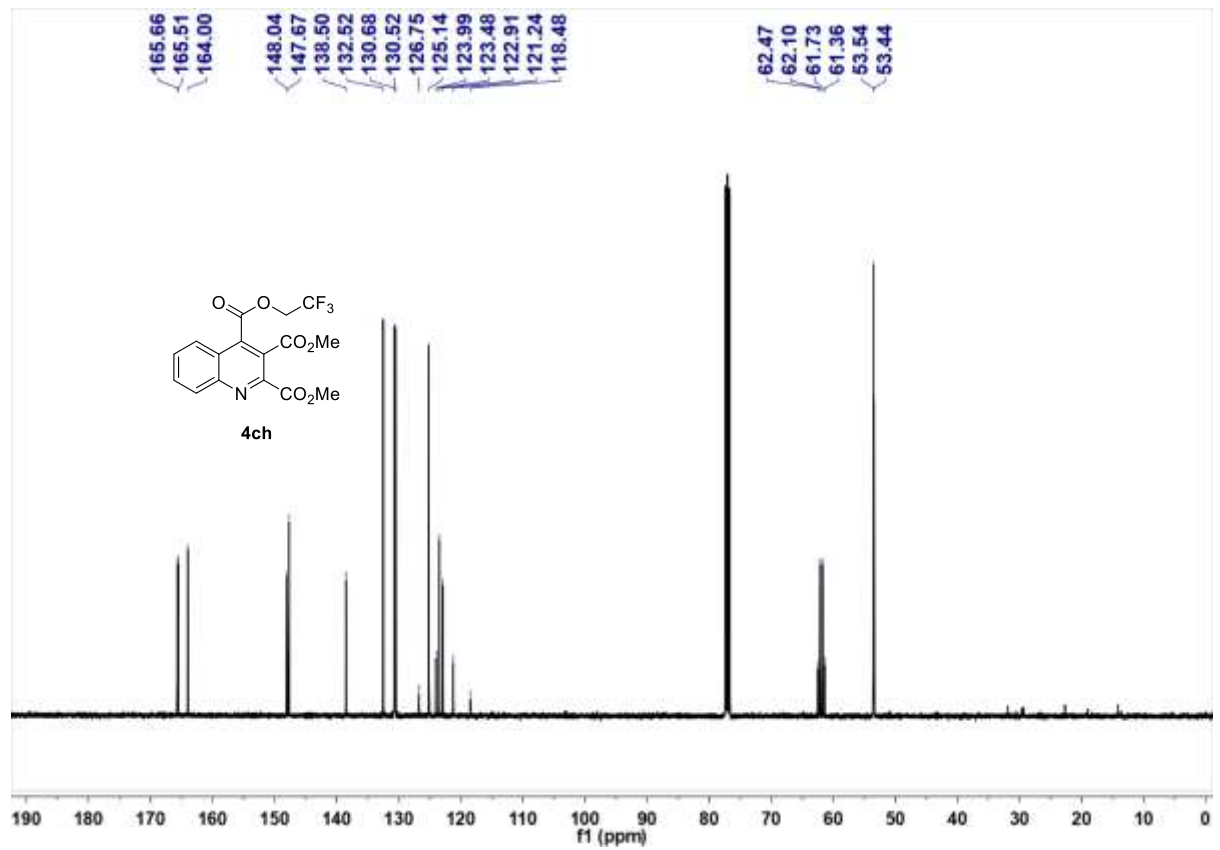

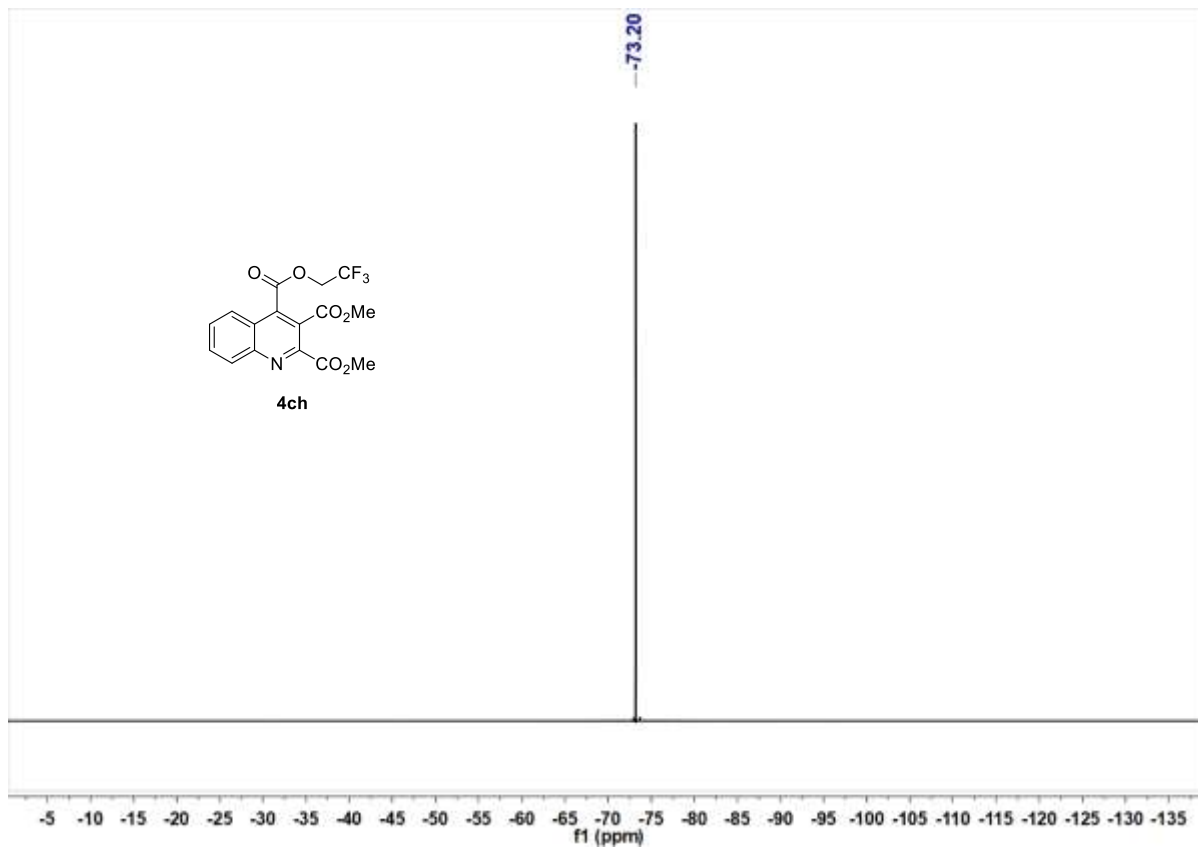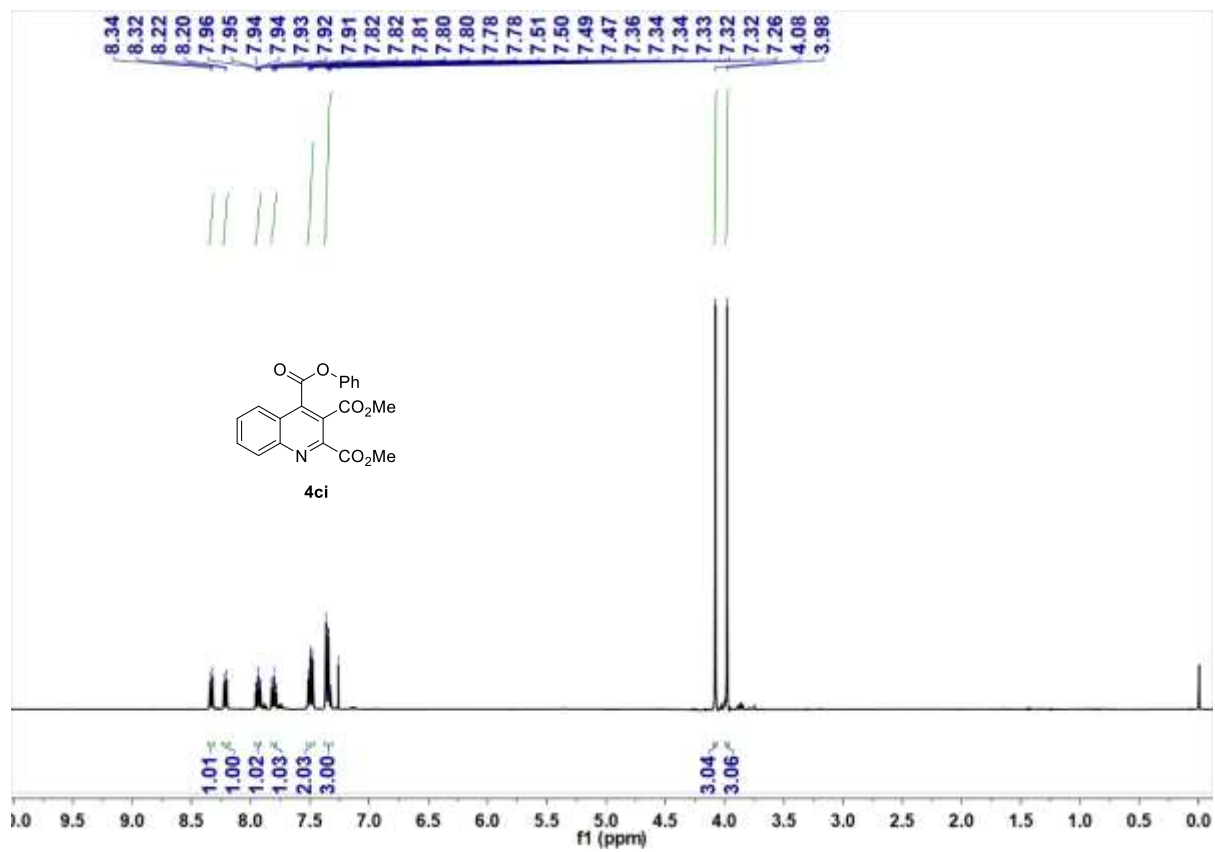

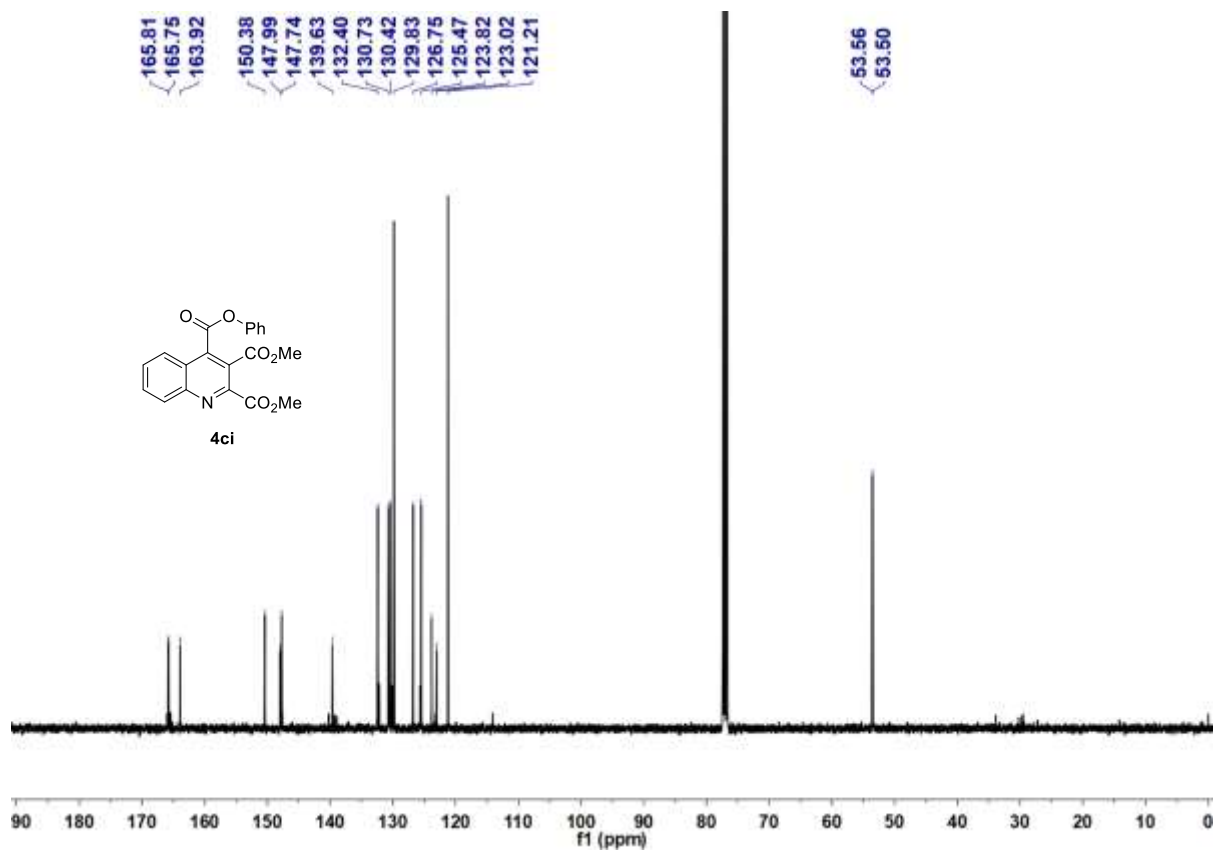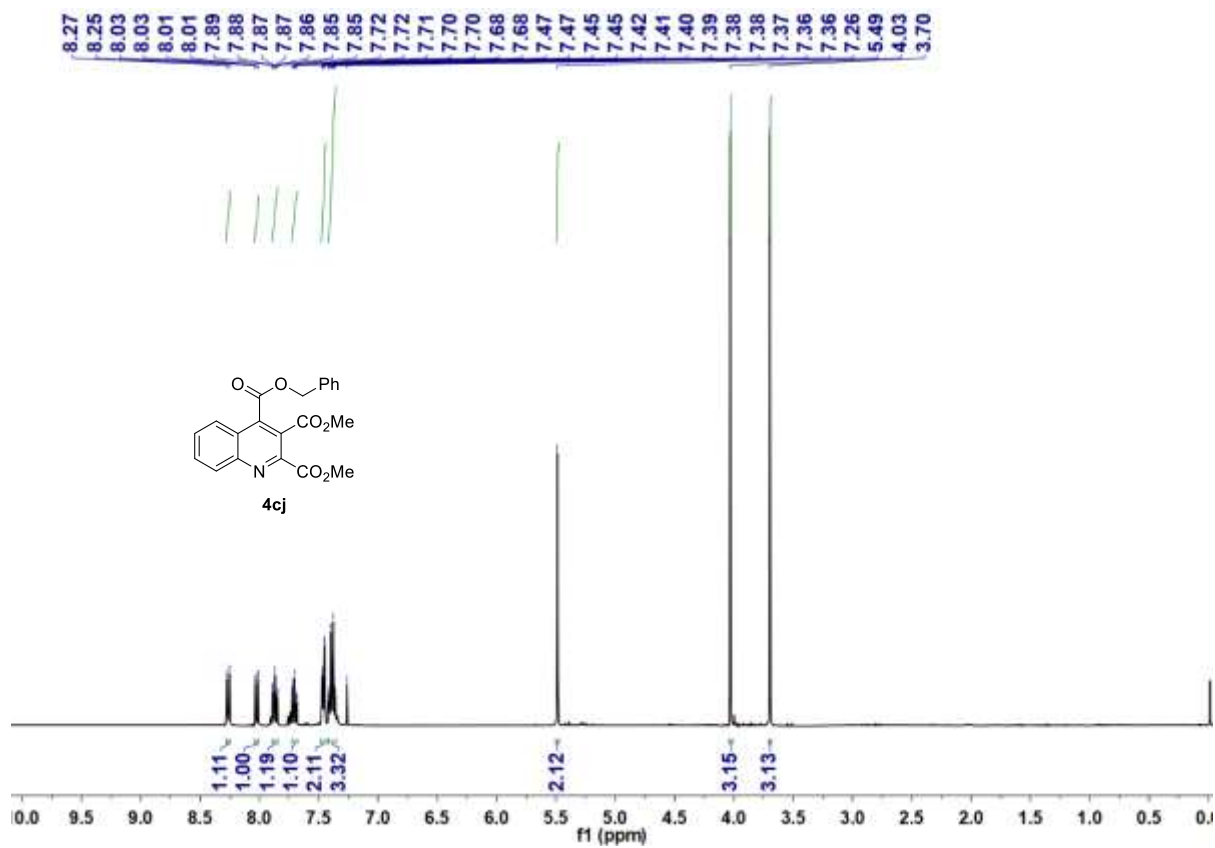

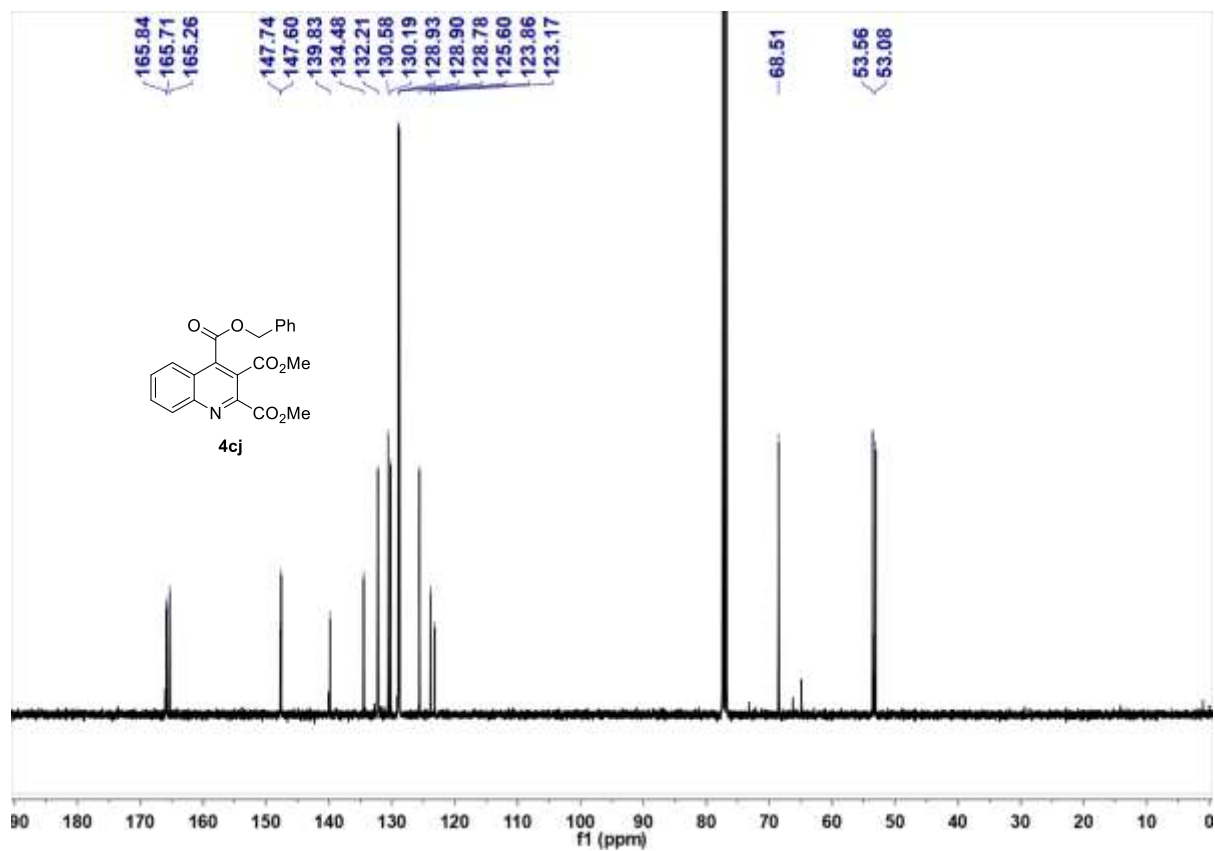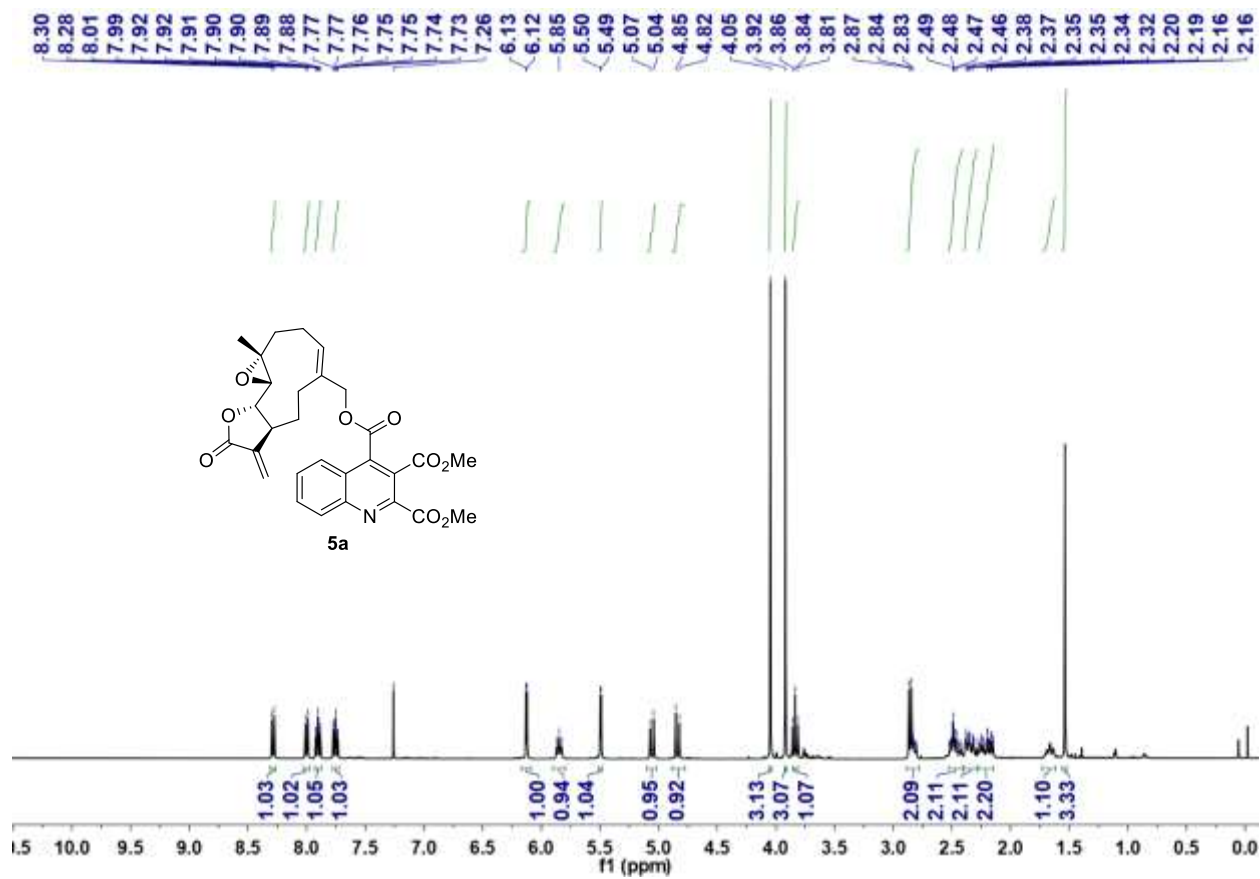

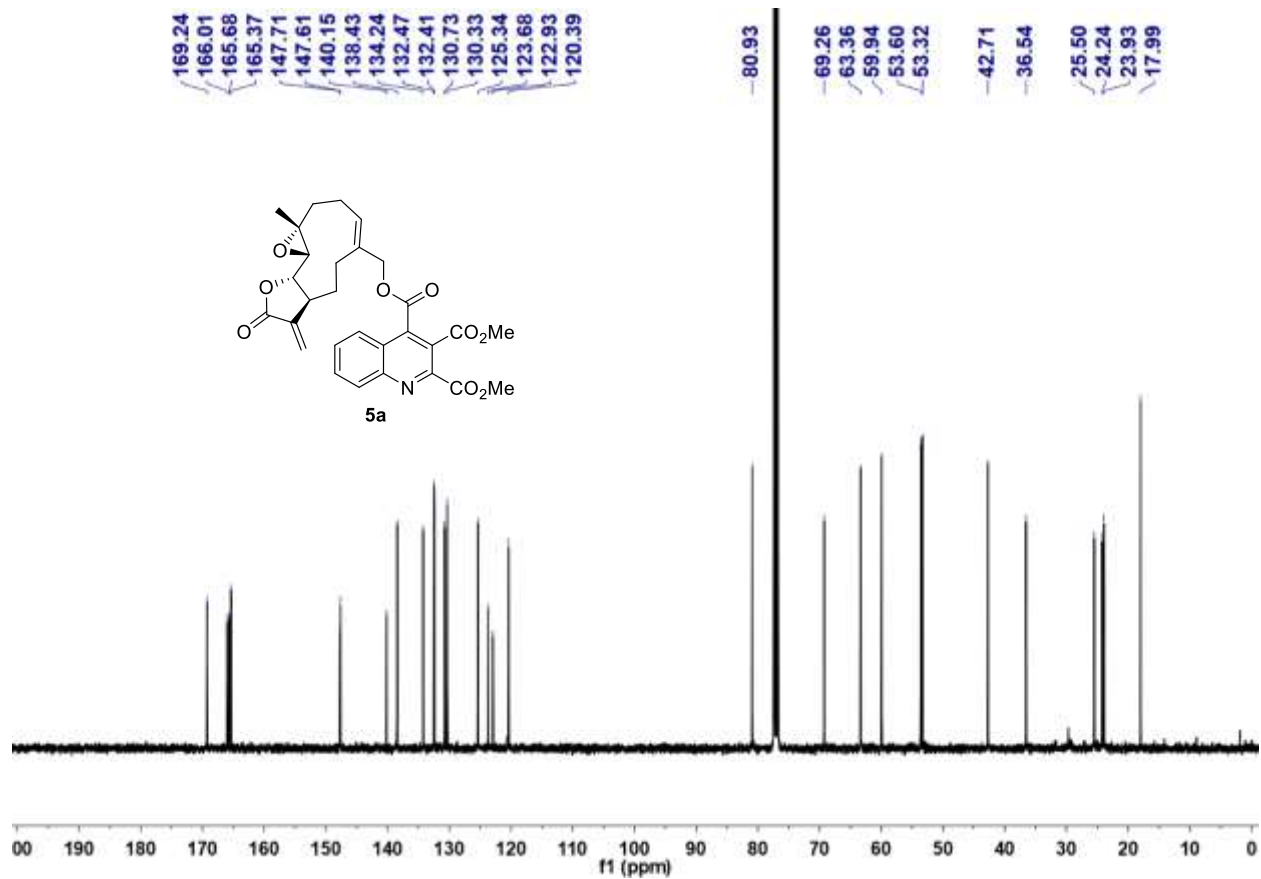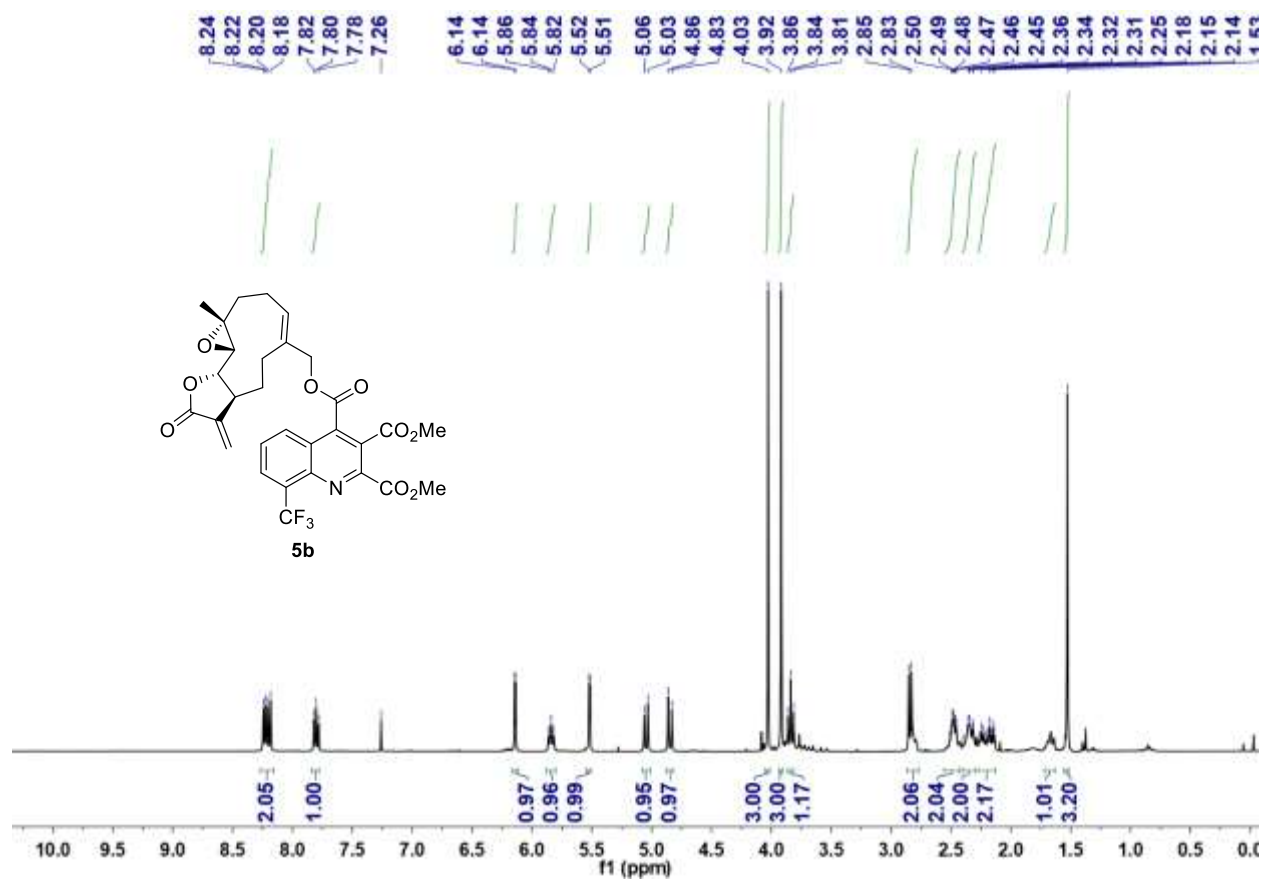

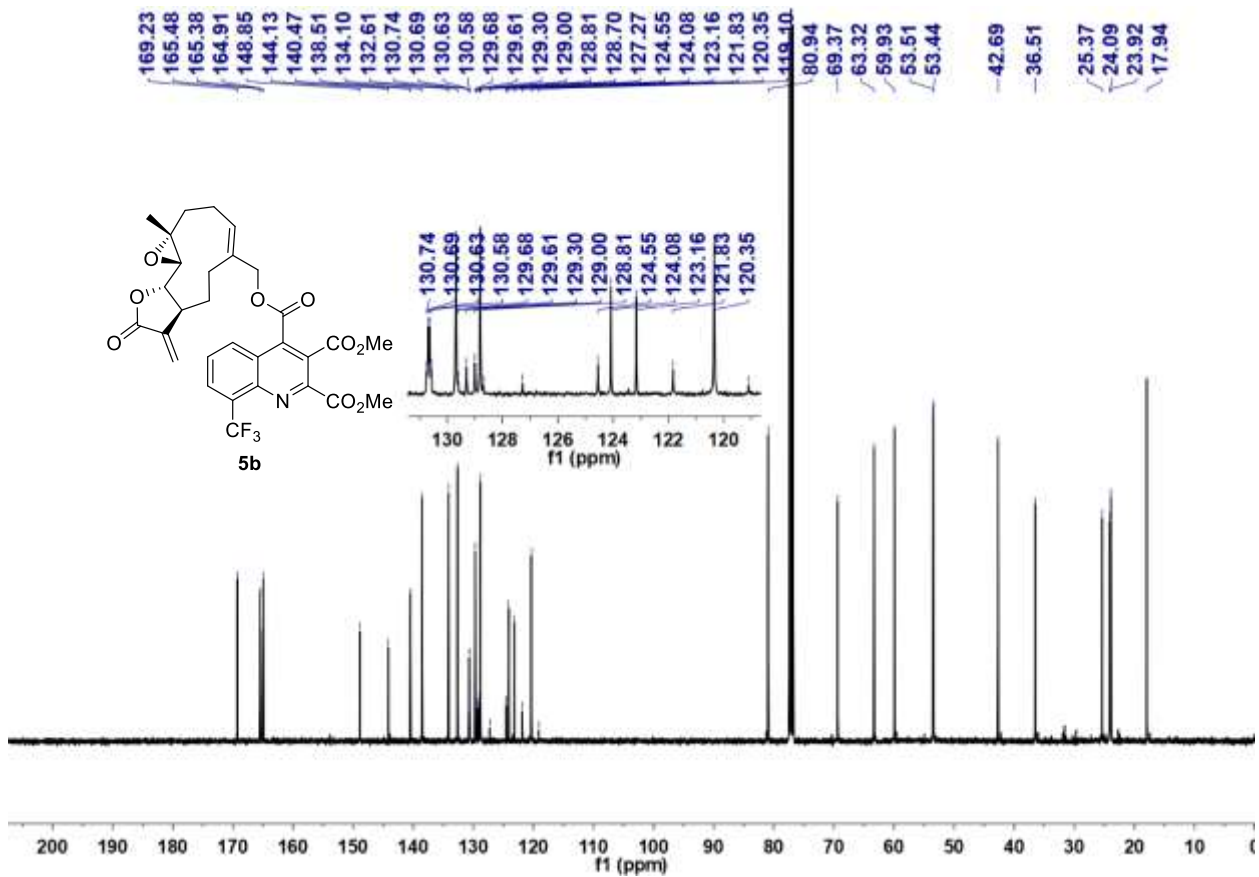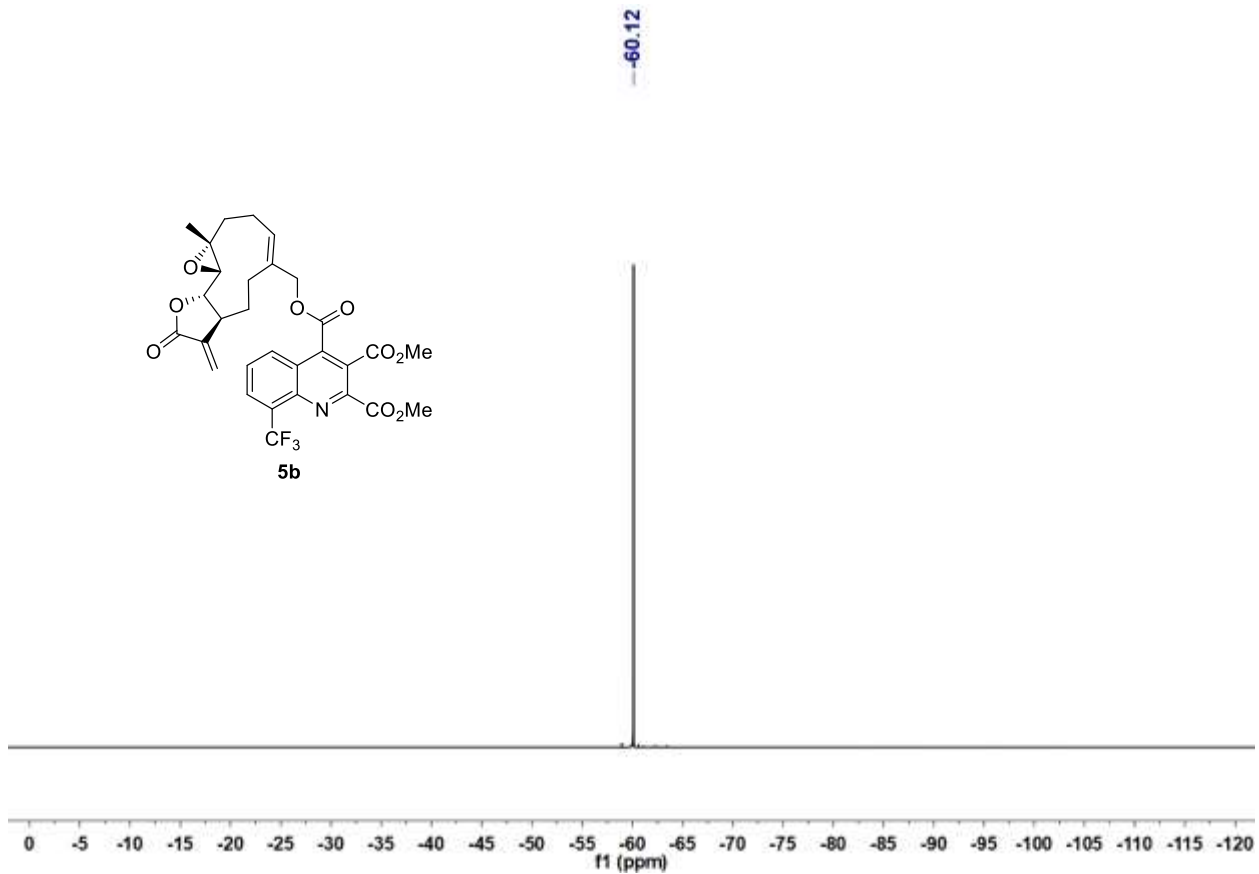

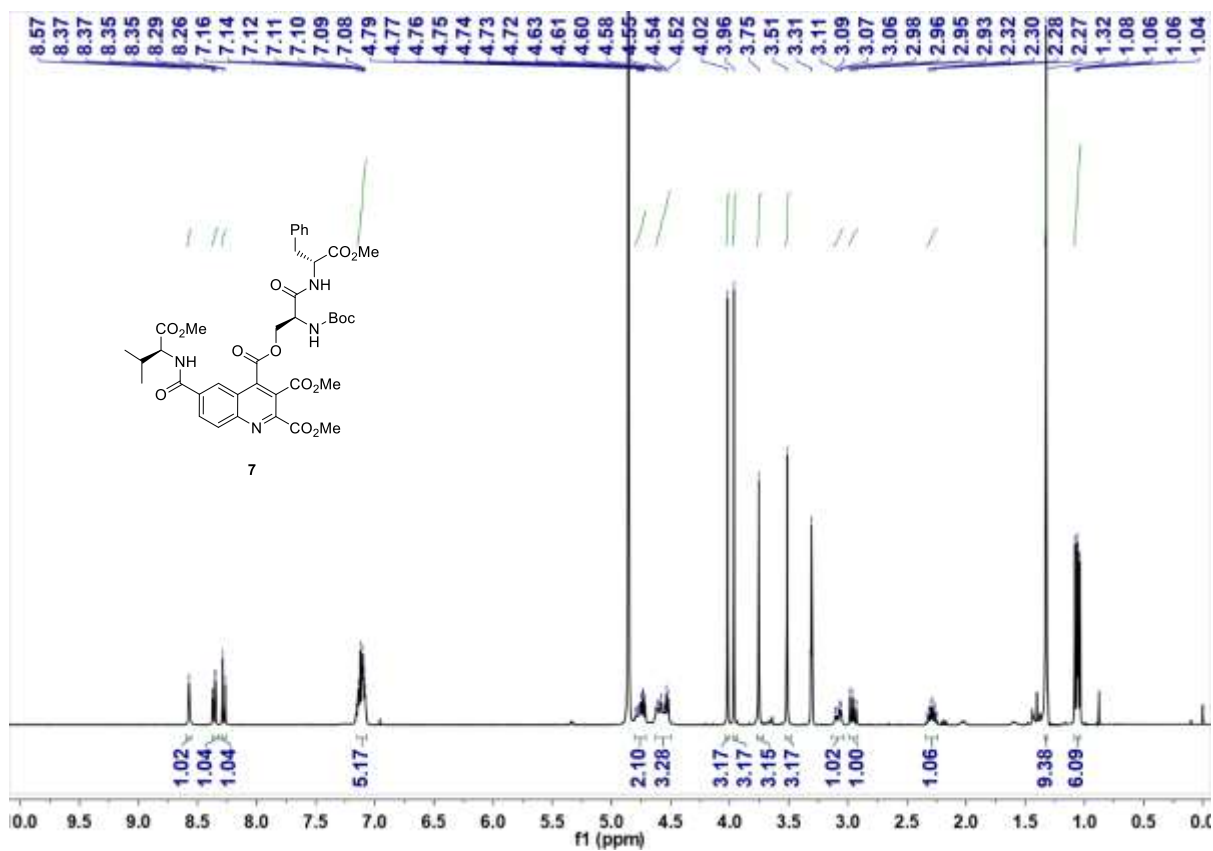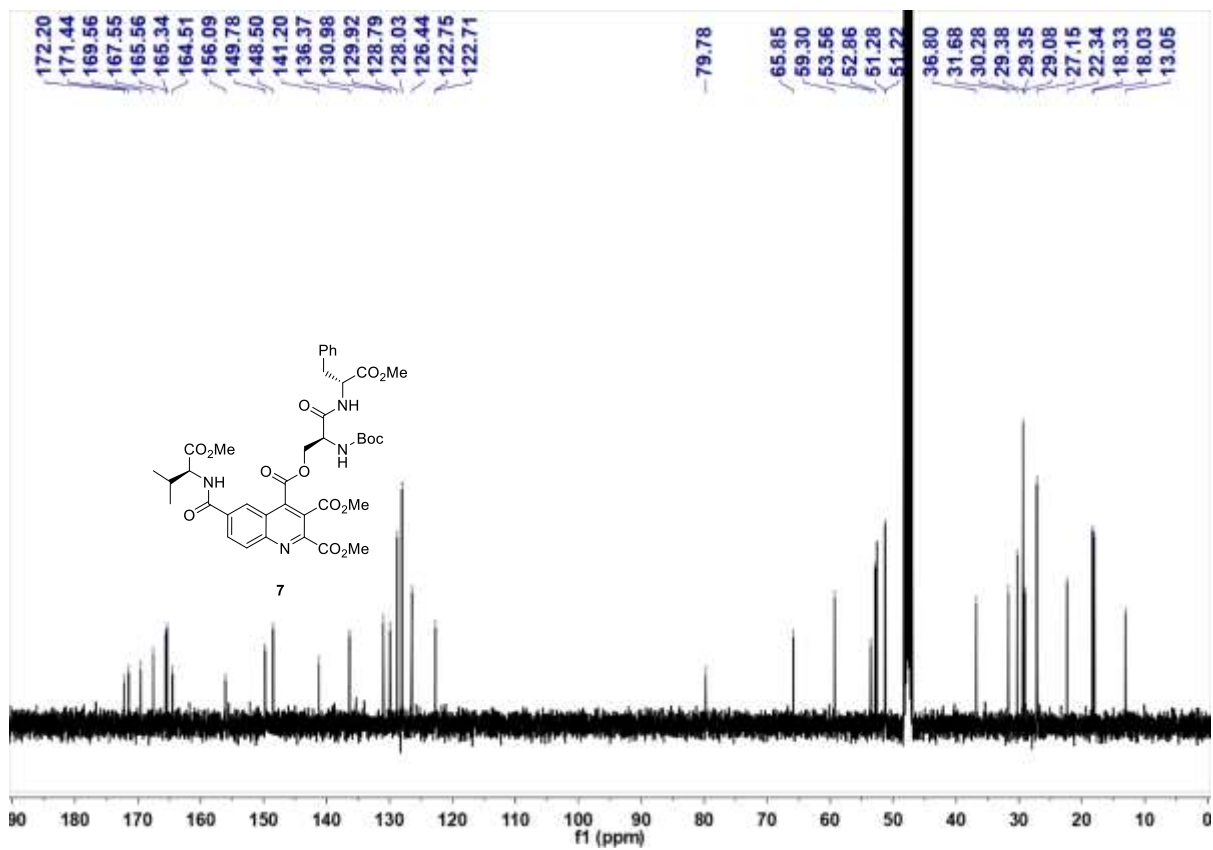

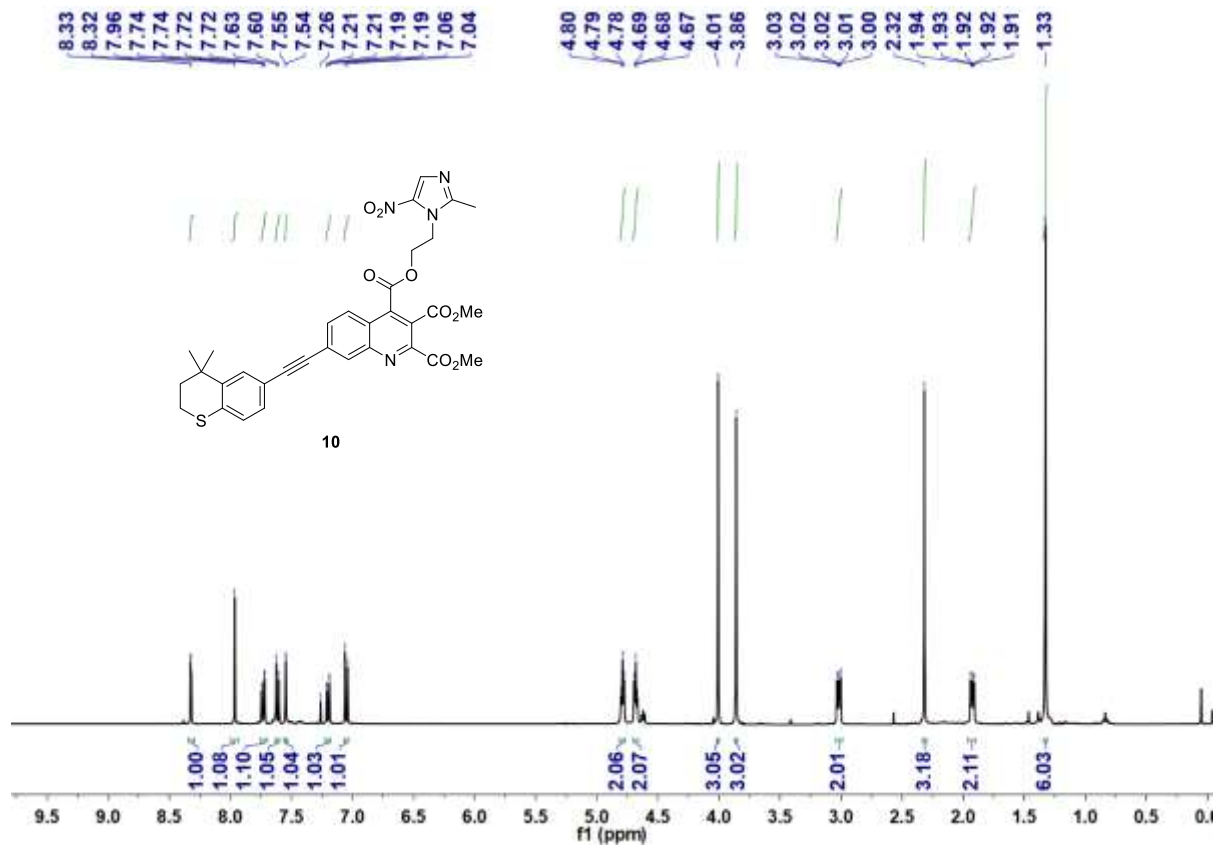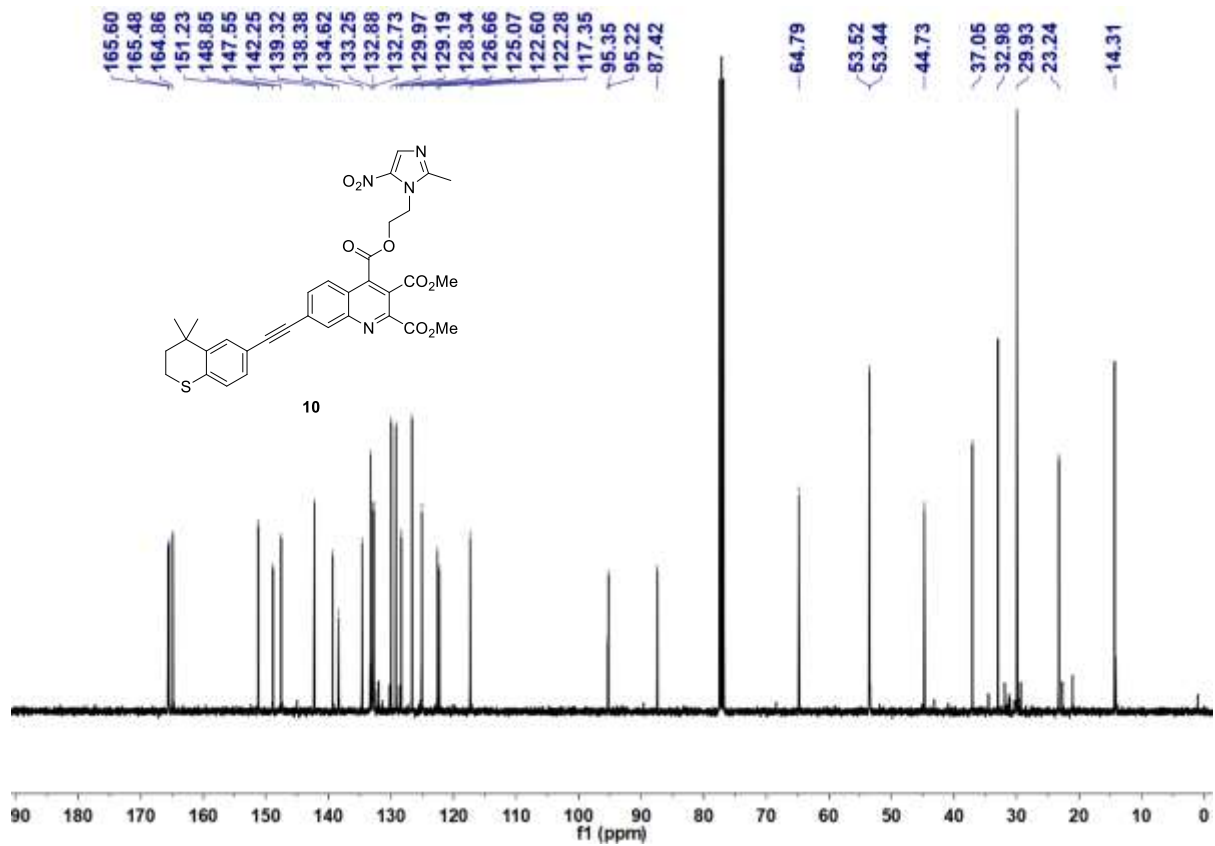



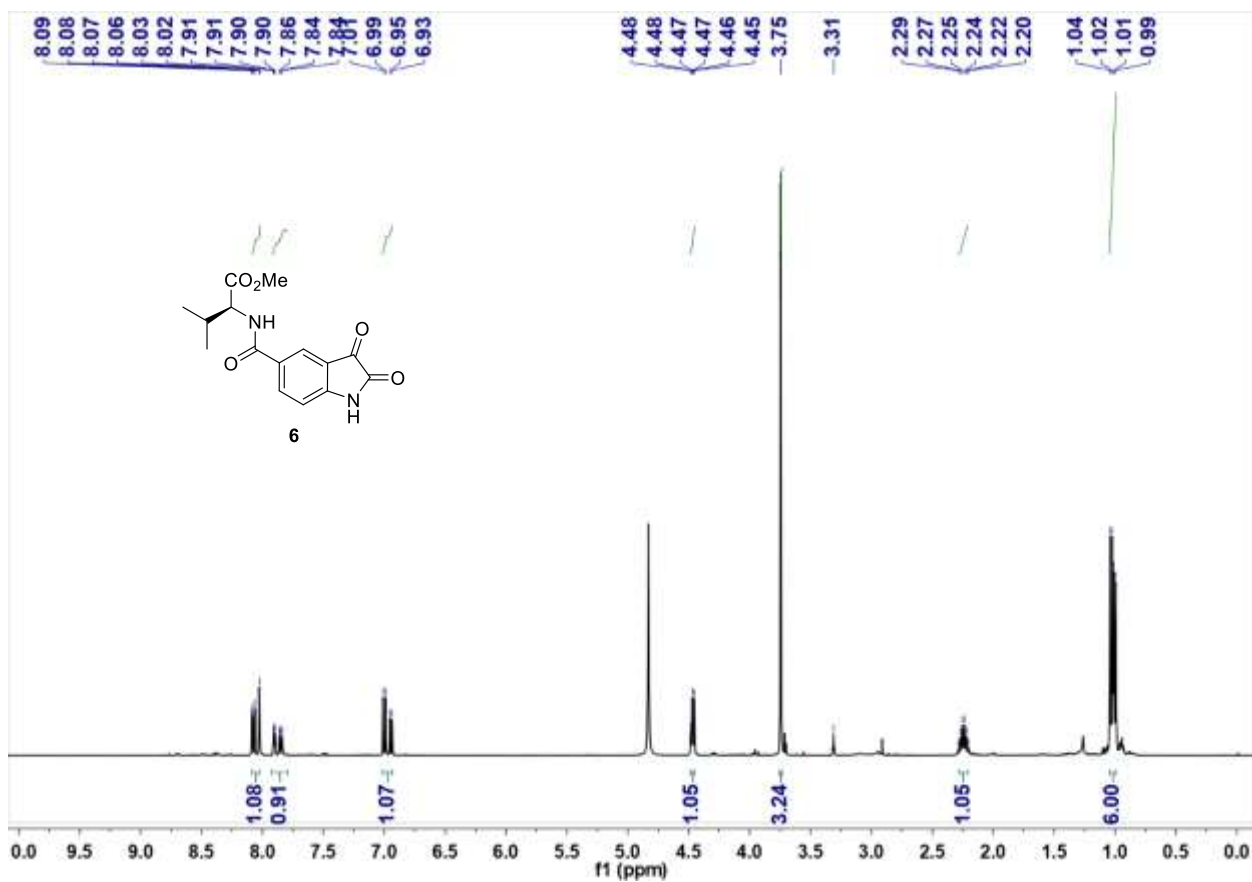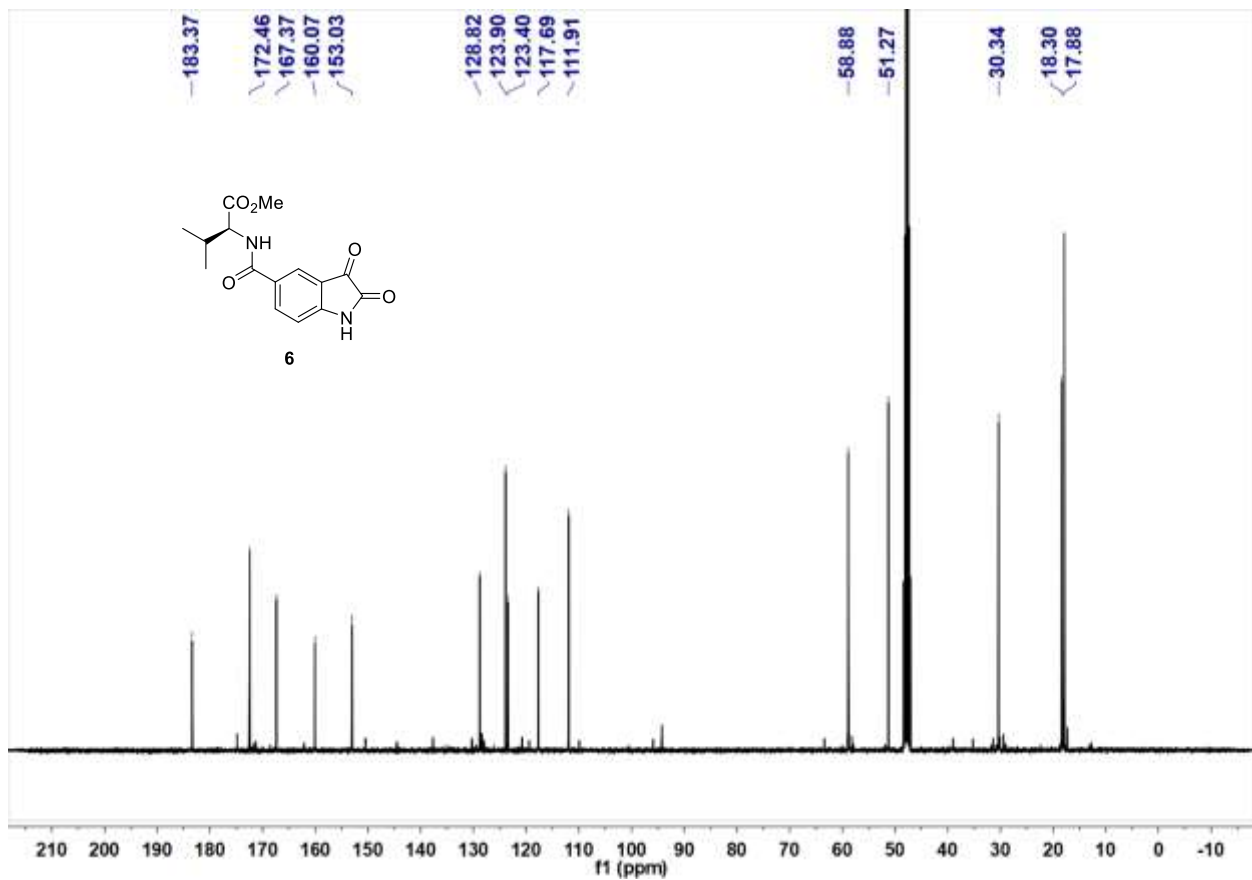

## 5.2 Fluorescence Measurement of selected Products

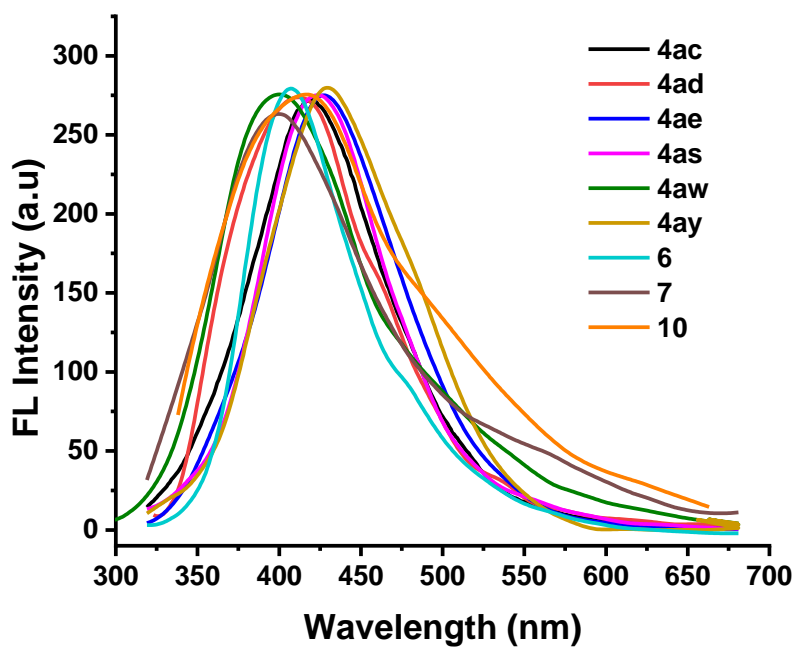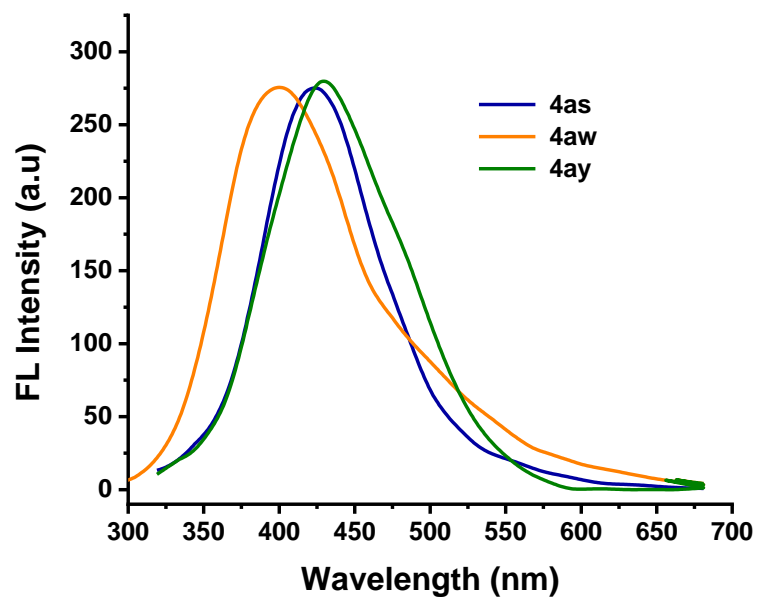

## 6. X-ray single-crystal data

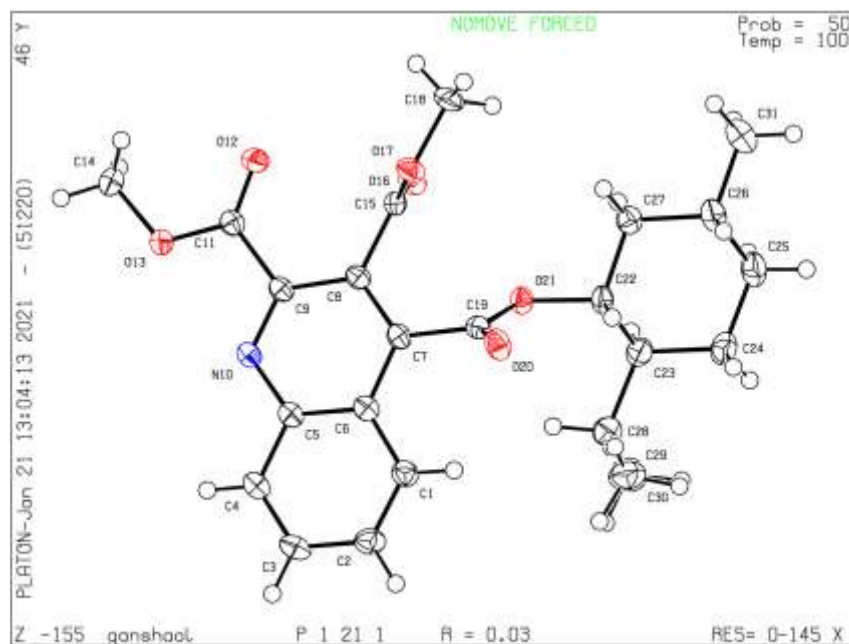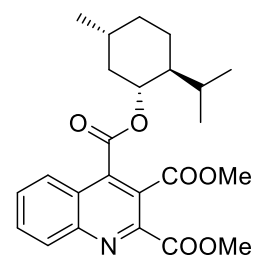

**4an : CCDC-2079883**

| CCDC-2079883                               |                                                 |
|--------------------------------------------|-------------------------------------------------|
| Formula                                    | C <sub>24</sub> H <sub>29</sub> NO <sub>6</sub> |
| Formula weight                             | 427.48                                          |
| Temperature / K                            | 100                                             |
| Crystal system                             | Monoclinic                                      |
| space group                                | <i>P</i> 1 21 1                                 |
| <i>a</i> / Å                               | 8.42220(10)                                     |
| <i>b</i> / Å                               | 8.60860(10)                                     |
| <i>c</i> / Å                               | 15.5730(2)                                      |
| <i>a</i> / °                               | 90                                              |
| <i>β</i> / °                               | 93.6740(10)                                     |
| <i>γ</i> / °                               | 90                                              |
| <i>V</i> / Å <sup>3</sup>                  | 1126.77(2)                                      |
| <i>Z</i>                                   | 2                                               |
| <i>D</i> <sub>x</sub> (g/cm <sup>3</sup> ) | 1.260                                           |
| <i>μ</i> / mm <sup>-1</sup>                | 0.741                                           |

|                                      |               |
|--------------------------------------|---------------|
| F (000)                              | 456.0         |
| Reflections collected                | 21426         |
| Independent reflections              | 4277          |
| R <sub>int</sub>                     | 0.0351        |
| GOF                                  | 1.040         |
| Final R indices ( $I > 2\sigma(I)$ ) | 0.0278,0.0717 |
| R indices (all data)                 | 0.0284,0.0723 |

## Datablock:

**Bond precision:** C-C = 0.0023 Å                      **Wavelength=1.54184**

Cell:                      a=8.4222(1) b=8.6086(1) c=15.5730(2)  
                               alpha=90 beta=93.674(1) gamma=90

Temperature:            100 K

|                                     | Calculated   | Reported     |
|-------------------------------------|--------------|--------------|
| Volume                              | 1126.77(2)   | 1126.77(2)   |
| Space group                         | P 21         | P 1 21 1     |
| Hall group                          | P 2yb        | P 2yb        |
| Moiety formula                      | C24 H29 N O6 | C24 H29 N O6 |
| Sum formula                         | C24 H29 N O6 | C24 H29 N O6 |
| Mr                                  | 427.48       | 427.48       |
| D <sub>x</sub> , g cm <sup>-3</sup> | 1.260        | 1.260        |
| Z                                   | 2            | 2            |
| Mu (mm <sup>-1</sup> )              | 0.741        | 0.741        |
| F000                                | 456.0        | 456.0        |
| F000'                               | 457.46       |              |
| h, k, l <sub>max</sub>              | 10, 10, 19   | 10, 10, 19   |
| N <sub>ref</sub>                    | 4573 [ 2447] | 4277         |
| T <sub>min</sub> , T <sub>max</sub> | 0.837, 0.929 | 0.890, 1.000 |
| T <sub>min</sub> '                  | 0.801        |              |

Correction method= # Reported T Limits: T<sub>min</sub>=0.890 T<sub>max</sub>=1.000  
 AbsCorr = MULTI-SCAN

Data completeness= 1.75/0.94                      Theta(max)= 73.984

R(reflections)= 0.0278( 4190)                      wR2(reflections)= 0.0723(  
 4277)

S = 1.040                                              N<sub>par</sub>= 285

The following ALERTS were generated. Each ALERT has the format  
**test-name\_ALERT\_alert-type\_alert-level.**  
 Click on the hyperlinks for more details of the test.

---

● **Alert level G**

|                                                                    |               |          |
|--------------------------------------------------------------------|---------------|----------|
| PLAT791_ALERT_4_G Model has Chirality at C22                       | (Sohnke SpGr) | R Verify |
| PLAT791_ALERT_4_G Model has Chirality at C23                       | (Sohnke SpGr) | S Verify |
| PLAT791_ALERT_4_G Model has Chirality at C26                       | (Sohnke SpGr) | R Verify |
| PLAT912_ALERT_4_G Missing # of FCF Reflections Above STh/L= 0.600  |               | 97 Note  |
| PLAT978_ALERT_2_G Number C-C Bonds with Positive Residual Density. |               | 2 Info   |
| PLAT992_ALERT_5_G Repd & Actual _reflns_number_gt Values Differ by |               | 2 Check  |

---

0 ALERT level A = Most likely a serious problem - resolve or explain  
0 ALERT level B = A potentially serious problem, consider carefully  
0 ALERT level C = Check. Ensure it is not caused by an omission or oversight  
6 ALERT level G = General information/check it is not something unexpected

0 ALERT type 1 CIF construction/syntax error, inconsistent or missing data  
1 ALERT type 2 Indicator that the structure model may be wrong or deficient  
0 ALERT type 3 Indicator that the structure quality may be low  
4 ALERT type 4 Improvement, methodology, query or suggestion  
1 ALERT type 5 Informative message, check

---

---
